# Supplementary material for: bicoid mRNA localises to the Drosophila oocyte anterior by random Dynein-mediated transport and anchoring
Source: eLife. 2016 Oct 28;5:e17537. doi: 10.7554/eLife.17537 (PMC5125753; doi:10.7554/eLife.17537)
Supplement: Figure 2—source data 1. — Includes the data in: Figure 2—figure supplement 1, panel B. DOI: http://dx.doi.org/10.7554/eLife.17537.012 [file elife-17537-fig2-data1.xlsx]

## Sheet: bcdTOMbcdTOM
Genotype	oocyte	movie	Distance from anterior (um)	Track distance (um)	speed (um/s)	angle (-90:+90)
bcdTOM/bcdTOM	1	1	1.534	1.45995	0.366333	-12.3798
bcdTOM/bcdTOM	1	1	1.915	1.6609	0.418667	59.6989
bcdTOM/bcdTOM	1	1	3.039	0.641974	0.239	-72.1295
bcdTOM/bcdTOM	1	1	5.964	2.17126	0.547	-86.4089
bcdTOM/bcdTOM	1	1	4.338	0.907662	0.227333	-35.4936
bcdTOM/bcdTOM	1	1	4.645	1.15015	0.288	-79.5303
bcdTOM/bcdTOM	1	1	4.082	0.576008	0.255	-78.2804
bcdTOM/bcdTOM	1	1	4.671	0.590479	0.158667	-33.7439
bcdTOM/bcdTOM	1	1	3.814	1.08289	0.279	-66.8917
bcdTOM/bcdTOM	1	1	3.09	1.65405	0.30925	65.5732
bcdTOM/bcdTOM	1	1	7.679	1.12278	0.419	-78.9603
bcdTOM/bcdTOM	1	1	3.333	1.2188	0.454	73.8996
bcdTOM/bcdTOM	1	1	2.471	0.739341	0.2755	43.0817
bcdTOM/bcdTOM	1	1	4.41	0.589085	0.147	-49.0611
bcdTOM/bcdTOM	1	1	8.985	0.976601	0.3645	-36.7995
bcdTOM/bcdTOM	1	1	3.799	1.11039	0.416	66.2052
bcdTOM/bcdTOM	1	1	8.339	1.84063	0.6855	88.5057
bcdTOM/bcdTOM	1	1	10.813	1.22877	0.4805	70.4591
bcdTOM/bcdTOM	1	1	9.984	0.674129	0.2595	-86.6834
bcdTOM/bcdTOM	1	1	4.601	0.671126	0.2505	-79.0919
bcdTOM/bcdTOM	1	1	4.001	1.59028	0.304	23.5345
bcdTOM/bcdTOM	1	1	9.5	0.905884	0.231667	-66.8595
bcdTOM/bcdTOM	1	2	6.755	0.603421	0.294	84.8657
bcdTOM/bcdTOM	1	2	4.271	1.89416	0.651	64.9502
bcdTOM/bcdTOM	1	2	5.769	3.14997	0.688429	74.2695
bcdTOM/bcdTOM	1	2	4.853	1.8551	0.684333	-72.786
bcdTOM/bcdTOM	1	2	9.361	1.39897	0.714	-30.451
bcdTOM/bcdTOM	1	2	15.973	3.10717	1.35175	58.0337
bcdTOM/bcdTOM	1	2	10.127	0.752814	0.359	-25.4077
bcdTOM/bcdTOM	1	2	8.382	2.88547	0.8484	-10.6245
bcdTOM/bcdTOM	1	2	5.875	2.97151	0.824167	-65.9709
bcdTOM/bcdTOM	1	2	12.399	1.38836	0.788	12.3945
bcdTOM/bcdTOM	1	2	4.566	1.26324	0.701667	10.7673
bcdTOM/bcdTOM	1	2	3.793	1.20354	0.674	-77.2801
bcdTOM/bcdTOM	1	2	2.775	1.04116	0.8835	-77.6324
bcdTOM/bcdTOM	1	2	4.304	1.97347	0.6634	19.2613
bcdTOM/bcdTOM	1	2	5.52	4.45897	0.931875	37.3633
bcdTOM/bcdTOM	1	2	7.323	0.723306	0.5975	-54.1124
bcdTOM/bcdTOM	1	2	5.353	1.62387	0.69875	75.339
bcdTOM/bcdTOM	1	2	9.461	0.825692	0.683	-5.4206
bcdTOM/bcdTOM	1	2	8.653	0.719928	0.5975	-13.1676
bcdTOM/bcdTOM	1	2	10.023	1.80656	0.6586	-73.3706
bcdTOM/bcdTOM	1	3	12.466	0.865772	0.3245	67.5227
bcdTOM/bcdTOM	1	3	5.032	1.03816	0.3855	10.4332
bcdTOM/bcdTOM	1	3	6.656	0.706375	0.2625	-38.7358
bcdTOM/bcdTOM	1	3	6.806	1.27261	0.24025	15.2156
bcdTOM/bcdTOM	1	3	5.093	1.64158	0.6165	39.0414
bcdTOM/bcdTOM	1	3	5.921	1.5994	0.597	-30.9269
bcdTOM/bcdTOM	1	3	5.026	1.69251	0.6345	18.9274
bcdTOM/bcdTOM	1	3	23.614	5.50335	0.590429	47.5848
bcdTOM/bcdTOM	1	4	7.473	2.00677	0.561333	83.7922
bcdTOM/bcdTOM	1	4	8.204	3.63604	1.0445	-34.3762
bcdTOM/bcdTOM	1	4	2.351	1.04859	0.3496	-60.2077
bcdTOM/bcdTOM	1	4	1.566	0.918029	0.391667	71.1901
bcdTOM/bcdTOM	1	4	3.116	0.644184	0.357	-22.0657
bcdTOM/bcdTOM	1	4	24.193	0.889074	0.459667	26.8821
bcdTOM/bcdTOM	1	4	3.817	1.19274	0.656667	35.9956
bcdTOM/bcdTOM	1	4	1.591	0.149164	0.318333	-76.4296
bcdTOM/bcdTOM	1	4	3.407	0.468885	0.267667	-28.2594
bcdTOM/bcdTOM	1	4	3.626	1.30685	1.0875	62.7683
bcdTOM/bcdTOM	1	4	1.943	1.07167	0.608667	-51.4404
bcdTOM/bcdTOM	1	4	3.784	1.64938	0.903	53.9777
bcdTOM/bcdTOM	2	5	7.698	1.91774	0.2525	46.6269
bcdTOM/bcdTOM	2	5	7.008	0.888708	0.246	-58.9036
bcdTOM/bcdTOM	2	5	6.821	0.658764	0.171	80.123
bcdTOM/bcdTOM	2	5	15.592	1.64003	0.432	-13.9007
bcdTOM/bcdTOM	2	5	18.103	0.39292	0.1605	-69.9048
bcdTOM/bcdTOM	2	5	4.162	0.679003	0.264	12.8491
bcdTOM/bcdTOM	2	5	6.542	2.46489	0.47925	-61.345
bcdTOM/bcdTOM	2	5	2.657	0.683345	0.2695	79.5452
bcdTOM/bcdTOM	2	5	1.924	0.871358	0.338	-15.1686
bcdTOM/bcdTOM	2	5	7.211	1.72326	0.450333	42.1306
bcdTOM/bcdTOM	2	5	4.958	0.708241	0.1385	29.8954
bcdTOM/bcdTOM	2	5	4.512	0.734137	0.191667	8.53848
bcdTOM/bcdTOM	2	5	2.086	0.646523	0.254	-87.6952
bcdTOM/bcdTOM	2	5	7.434	1.50321	0.398333	-68.3331
bcdTOM/bcdTOM	2	5	5.9	1.85553	0.2944	63.0483
bcdTOM/bcdTOM	2	5	6.975	1.99189	0.773	59.9982
bcdTOM/bcdTOM	2	5	7.839	0.979613	0.3895	-39.9479
bcdTOM/bcdTOM	2	6	7.27	0.900347	0.42875	-14.6691
bcdTOM/bcdTOM	2	6	7.479	0.852053	0.581333	75.5234
bcdTOM/bcdTOM	2	6	6.773	0.391812	0.477667	48.6215
bcdTOM/bcdTOM	2	6	6.747	1.34108	0.675333	-82.6312
bcdTOM/bcdTOM	2	6	5.076	1.74327	0.481333	17.0109
bcdTOM/bcdTOM	2	6	4.563	0.461684	0.3125	37.9621
bcdTOM/bcdTOM	2	6	15.645	3.49292	0.6965	10.3577
bcdTOM/bcdTOM	2	6	15.942	2.16127	0.865857	-83.8911
bcdTOM/bcdTOM	2	6	5.447	2.82462	0.456833	30.6507
bcdTOM/bcdTOM	2	6	10.582	0.971883	0.906	-59.107
bcdTOM/bcdTOM	2	6	8.718	0.793502	0.7395	-70.7202
bcdTOM/bcdTOM	2	6	8.602	0.604299	0.413667	-60.1258
bcdTOM/bcdTOM	3	7	2.546	4.72079	0.339	79.6517
bcdTOM/bcdTOM	3	7	3.468	1.82509	0.33925	-30.9638
bcdTOM/bcdTOM	3	7	8.993	1.58044	0.307	4.75461
bcdTOM/bcdTOM	3	7	5.818	1.31616	0.492	-83.2368
bcdTOM/bcdTOM	3	7	5.105	1.6819	0.6235	-75.1871
bcdTOM/bcdTOM	3	7	2.464	2.34566	0.574333	-7.79157
bcdTOM/bcdTOM	3	7	0.66	1.52737	0.5615	27.32
bcdTOM/bcdTOM	3	7	3.01	1.10869	0.272333	-10.8133
bcdTOM/bcdTOM	3	7	4.938	1.74567	0.6375	-47.1589
bcdTOM/bcdTOM	3	7	2.935	0.601606	0.2395	34.2976
bcdTOM/bcdTOM	3	7	3.945	6.34129	0.9314	50.1308
bcdTOM/bcdTOM	3	7	2.434	1.50429	0.368	9.8756
bcdTOM/bcdTOM	3	7	4.608	1.40511	0.3955	24.5587
bcdTOM/bcdTOM	3	7	10.954	1.87004	0.34475	27.4831
bcdTOM/bcdTOM	3	7	3.119	2.18949	0.440286	-45.9252
bcdTOM/bcdTOM	3	7	3.74	1.6669	0.2448	77.2811
bcdTOM/bcdTOM	3	7	2.562	0.878053	0.214	14.7801
bcdTOM/bcdTOM	3	7	3.789	1.34038	0.24725	21.3966
bcdTOM/bcdTOM	3	7	3.587	0.735833	0.192	-50.4038
bcdTOM/bcdTOM	3	7	3.851	1.54337	0.564	-57.731
bcdTOM/bcdTOM	3	7	6.769	0.470814	0.172	54.8584
bcdTOM/bcdTOM	3	7	6.111	1.63492	0.3	41.5782
bcdTOM/bcdTOM	3	7	0.844	3.26404	0.599	10.914
bcdTOM/bcdTOM	3	7	3.872	2.75758	1.0205	81.8905
bcdTOM/bcdTOM	3	7	5.616	2.33899	0.8565	-50.047
bcdTOM/bcdTOM	3	7	2.237	1.12085	0.153	-10.7986
bcdTOM/bcdTOM	3	7	1.101	0.980672	0.1815	24.971
bcdTOM/bcdTOM	3	7	4.145	1.70272	0.6495	45.1904
bcdTOM/bcdTOM	3	7	2.564	1.99321	0.3755	-36.6572
bcdTOM/bcdTOM	3	7	3.209	1.429	0.1672	74.4952
bcdTOM/bcdTOM	3	7	3.531	0.749427	0.2735	55.8222
bcdTOM/bcdTOM	3	7	2.386	2.34566	0.3868	-7.79157
bcdTOM/bcdTOM	3	7	2.088	1.79374	0.34175	-2.52424
bcdTOM/bcdTOM	3	7	9.963	1.56629	0.402	-55.0619
bcdTOM/bcdTOM	3	7	0.703	0.668321	0.2435	-3.60307
bcdTOM/bcdTOM	3	7	11.553	0.912522	0.333	-40.7784
bcdTOM/bcdTOM	3	7	2.893	0.686543	0.252	-18.778
bcdTOM/bcdTOM	3	7	2.837	1.05208	0.3905	-50.0898
bcdTOM/bcdTOM	3	7	11.168	3.0022	1.097	-36.8623
bcdTOM/bcdTOM	3	7	30.592	0.969889	0.354	71.92
bcdTOM/bcdTOM	3	7	2.866	2.35258	0.599333	-27.382
bcdTOM/bcdTOM	3	7	1.9	2.38685	0.451	-8.60198
bcdTOM/bcdTOM	3	7	5.619	0.365833	0.134	55.919
bcdTOM/bcdTOM	3	7	5.39	0.876708	0.3205	-82.3967
bcdTOM/bcdTOM	3	7	2.679	0.639062	0.2475	16.7336
bcdTOM/bcdTOM	3	7	5.625	0.502299	0.1935	17.1363
bcdTOM/bcdTOM	3	7	4.529	0.811717	0.306	37.844
bcdTOM/bcdTOM	3	7	1.674	0.677414	0.2545	11.8407
bcdTOM/bcdTOM	3	8	5.311	4.52164	0.852667	4.45216
bcdTOM/bcdTOM	3	8	3.272	0.618181	0.5585	50.6454
bcdTOM/bcdTOM	3	8	3.072	0.303211	0.274	52.6388
bcdTOM/bcdTOM	3	8	3.063	0.859958	0.7755	3.86726
bcdTOM/bcdTOM	3	8	1.977	0.552014	0.511667	-89.5848
bcdTOM/bcdTOM	3	8	5.695	3.66063	0.747889	-48.8877
bcdTOM/bcdTOM	3	8	9.64	0.80598	0.315333	21.0885
bcdTOM/bcdTOM	3	8	8.462	0.980002	0.669	89.8831
bcdTOM/bcdTOM	3	8	5.374	1.02961	0.3864	28.4817
bcdTOM/bcdTOM	3	8	0.955	0.791122	0.649667	26.6622
bcdTOM/bcdTOM	3	8	5.126	1.86243	0.84625	-50.8838
bcdTOM/bcdTOM	3	8	1.22	0.623549	0.61	82.3507
bcdTOM/bcdTOM	3	8	1.626	0.871482	0.526	-55.7082
bcdTOM/bcdTOM	3	8	5.491	0.300541	0.2725	-44.326
bcdTOM/bcdTOM	3	8	5.417	1.31935	0.4834	-18.9293
bcdTOM/bcdTOM	3	8	1.446	0.906141	0.546333	-1.01174
bcdTOM/bcdTOM	3	8	1.187	1.41747	0.64525	-13.3794
bcdTOM/bcdTOM	3	8	1.649	0.590824	0.360667	-25.7844
bcdTOM/bcdTOM	3	8	2.947	1.00493	0.4755	-26.0296
bcdTOM/bcdTOM	3	8	6.971	0.813143	0.438333	79.2981
bcdTOM/bcdTOM	3	8	4.725	0.422962	0.245	33.9155
bcdTOM/bcdTOM	3	8	2.485	1.14963	0.423	14.3022
bcdTOM/bcdTOM	3	8	4.521	0.881083	0.535667	44.5402
bcdTOM/bcdTOM	3	8	3.451	3.05707	0.822286	61.7919
bcdTOM/bcdTOM	3	8	0.979	1.77804	1.08767	38.6296
bcdTOM/bcdTOM	3	8	6.747	0.270085	0.415667	19.24
bcdTOM/bcdTOM	3	8	7.785	0.742597	0.672	-58.7716
bcdTOM/bcdTOM	3	8	9.506	2.0854	1.002	-87.2515
bcdTOM/bcdTOM	3	8	3.117	0.642259	0.396	-71.4804
bcdTOM/bcdTOM	3	8	6.907	0.653903	0.419	-35.8534
bcdTOM/bcdTOM	3	8	11.465	1.47063	0.67325	-39.7307
bcdTOM/bcdTOM	3	8	9.712	0.810541	0.801	-8.79991
bcdTOM/bcdTOM	3	8	9.725	0.786618	0.7315	21.4768
bcdTOM/bcdTOM	3	8	2.389	0.349322	0.327	-87.5389
bcdTOM/bcdTOM	4	9	5.803	0.993265	0.1023	-46.795
bcdTOM/bcdTOM	4	9	3.148	1.84033	0.507	-1.08973
bcdTOM/bcdTOM	4	9	1.912	1.47225	0.325667	-51.4253
bcdTOM/bcdTOM	4	9	2.021	1.38419	0.299667	11.3749
bcdTOM/bcdTOM	4	9	5.681	1.0385	0.284667	66.8666
bcdTOM/bcdTOM	4	9	12.855	1.95295	0.403	59.9822
bcdTOM/bcdTOM	4	9	11.199	0.875615	0.245667	83.5081
bcdTOM/bcdTOM	4	9	3.271	1.40742	0.2334	-52.7963
bcdTOM/bcdTOM	4	9	5.597	0.628033	0.173333	40.156
bcdTOM/bcdTOM	4	9	6.484	1.2062	0.328333	56.4285
bcdTOM/bcdTOM	4	9	4.331	0.566591	0.188	23.3978
bcdTOM/bcdTOM	4	9	6.994	4.38578	0.47525	29.5051
bcdTOM/bcdTOM	4	9	8.583	0.959754	0.270333	58.4629
bcdTOM/bcdTOM	4	9	6.982	3.30335	0.312929	-48.6819
bcdTOM/bcdTOM	4	9	7.323	1.09997	0.307333	-75.3068
bcdTOM/bcdTOM	4	9	3.411	1.26425	0.2084	-88.8669
bcdTOM/bcdTOM	4	9	4.714	1.21613	0.503	-37.718
bcdTOM/bcdTOM	4	9	4.857	0.248823	0.204333	-52.3472
bcdTOM/bcdTOM	4	9	1.587	0.826395	0.3455	-19.29
bcdTOM/bcdTOM	4	9	4.031	0.530159	0.223	1.40509
bcdTOM/bcdTOM	4	9	4.143	0.627273	0.256	-37.7468
bcdTOM/bcdTOM	4	9	7.767	1.00225	0.2115	-65.2249
bcdTOM/bcdTOM	4	9	16.053	2.14766	0.594333	75.7955
bcdTOM/bcdTOM	4	9	15.269	6.5048	0.8945	56.6397
bcdTOM/bcdTOM	4	9	6.277	1.27392	0.212	-76.7492
bcdTOM/bcdTOM	4	9	12.638	0.764997	0.318	76.5451
bcdTOM/bcdTOM	4	9	8.275	1.06978	0.296333	-56.7853
bcdTOM/bcdTOM	4	9	28.011	1.93016	0.325	57.7838
bcdTOM/bcdTOM	4	9	10.972	7.52902	0.771875	-10.9876
bcdTOM/bcdTOM	4	9	22.787	1.20594	0.504	78.3267
bcdTOM/bcdTOM	4	9	18.107	0.839563	0.3525	-55.8746
bcdTOM/bcdTOM	4	9	4.353	2.13268	0.43675	71.2082
bcdTOM/bcdTOM	4	10	9.318	2.11051	0.661	71.6337
bcdTOM/bcdTOM	4	10	4.792	1.51388	0.499333	8.81522
bcdTOM/bcdTOM	4	10	13.165	3.21234	0.8345	49.153
bcdTOM/bcdTOM	4	10	2.25	1.04025	0.2135	-26.9838
bcdTOM/bcdTOM	4	10	5.478	0.980458	0.3775	-46.6531
bcdTOM/bcdTOM	4	10	5.251	1.23736	0.179111	-16.238
bcdTOM/bcdTOM	4	10	4.639	0.208828	0.1755	-37.8028
bcdTOM/bcdTOM	4	10	9.433	1.35624	0.8685	-81.6907
bcdTOM/bcdTOM	4	10	8.25	1.3688	0.406167	66.2628
bcdTOM/bcdTOM	4	10	29.663	1.13377	0.528	-70.8459
bcdTOM/bcdTOM	4	10	2.419	1.11386	0.4408	-44.0179
bcdTOM/bcdTOM	4	10	8.461	4.18694	0.7967	22.7925
bcdTOM/bcdTOM	4	10	3.367	1.09473	0.431667	29.7968
bcdTOM/bcdTOM	4	10	5.64	0.754801	0.477	73.8461
bcdTOM/bcdTOM	4	10	12.855	0.589456	0.378333	81.5125
bcdTOM/bcdTOM	4	10	17.552	0.156818	0.147	37.7468
bcdTOM/bcdTOM	4	10	12.878	0.5454	0.341667	-11.2069
bcdTOM/bcdTOM	5	11	34.356	1.74447	0.472333	-86.3847
bcdTOM/bcdTOM	5	11	14.676	1.77556	0.7175	-24.241
bcdTOM/bcdTOM	5	11	6.523	0.80823	0.2558	-4.25734
bcdTOM/bcdTOM	5	11	4.078	0.531	0.213	7.01671e-15
bcdTOM/bcdTOM	5	11	1.481	0.321076	0.117333	68.6294
bcdTOM/bcdTOM	5	11	28.222	1.91708	0.265333	12.9924
bcdTOM/bcdTOM	5	11	27.394	0.894926	0.369	66.07
bcdTOM/bcdTOM	5	11	38.585	0.629007	0.172	12.9537
bcdTOM/bcdTOM	5	11	11.891	2.01116	0.541333	17.507
bcdTOM/bcdTOM	5	11	10.909	0.814033	0.332	49.2842
bcdTOM/bcdTOM	5	11	11.867	3.26861	0.875333	-23.1687
bcdTOM/bcdTOM	5	11	11.194	2.39744	0.3898	39.3466
bcdTOM/bcdTOM	5	11	13.063	0.993114	0.399	-22.1228
bcdTOM/bcdTOM	5	11	10.81	2.77523	0.374833	20.1718
bcdTOM/bcdTOM	5	11	14.08	1.06942	0.4605	19.6718
bcdTOM/bcdTOM	5	11	6.51	1.63629	0.6575	-41.209
bcdTOM/bcdTOM	5	11	3.185	1.80396	0.7405	2.6689
bcdTOM/bcdTOM	5	11	5.066	0.998979	0.4015	40.2902
bcdTOM/bcdTOM	5	11	17.755	2.71934	0.2575	-42.8392
bcdTOM/bcdTOM	5	11	17.164	1.75639	0.36025	3.55802
bcdTOM/bcdTOM	5	12	3.999	3.11226	2.8995	45.7681
bcdTOM/bcdTOM	5	12	6.955	2.74634	0.596778	-43.2
bcdTOM/bcdTOM	5	12	1.083	0.523941	0.348	80.6635
bcdTOM/bcdTOM	5	12	17.544	0.488774	0.333667	59.2373
bcdTOM/bcdTOM	5	12	4.182	4.45632	2.775	45.4364
bcdTOM/bcdTOM	5	12	4.376	2.32463	2.1765	-26.7414
bcdTOM/bcdTOM	5	12	4.983	1.38846	0.950667	82.6344
bcdTOM/bcdTOM	5	12	9.282	1.20686	0.770667	32.9263
bcdTOM/bcdTOM	5	12	11.414	0.495891	0.311	15.4375
bcdTOM/bcdTOM	5	12	11.562	1.4268	0.56	21.1154
bcdTOM/bcdTOM	5	12	37.586	1.59328	0.746	-23.0569
bcdTOM/bcdTOM	5	12	38.065	1.57577	0.76575	-18.5384
bcdTOM/bcdTOM	5	12	38.324	0.951723	0.404	-35.3767
bcdTOM/bcdTOM	5	12	16.935	1.12547	0.54825	-36.2183
bcdTOM/bcdTOM	5	12	3.387	1.04762	0.660667	-64.6824
bcdTOM/bcdTOM	6	13	19.525	2.97353	0.440833	-78.9092
bcdTOM/bcdTOM	6	13	12.768	1.40186	0.2855	48.8756
bcdTOM/bcdTOM	6	13	13.12	0.871746	0.235	-55.7995
bcdTOM/bcdTOM	6	13	7.736	0.86214	0.336	-73.3517
bcdTOM/bcdTOM	6	13	9.295	1.48877	0.5855	-62.0407
bcdTOM/bcdTOM	6	13	2.85	3.61087	0.318333	19.007
bcdTOM/bcdTOM	6	13	9.968	0.528008	0.2055	-85.0021
bcdTOM/bcdTOM	6	13	7.815	1.88751	0.494	9.05311
bcdTOM/bcdTOM	6	13	10.472	1.12389	0.439	-27.0438
bcdTOM/bcdTOM	6	13	14.123	1.27897	0.253	34.4232
bcdTOM/bcdTOM	6	13	16.073	1.45666	0.398667	-45.2781
bcdTOM/bcdTOM	6	13	10.937	0.779965	0.3045	82.3374
bcdTOM/bcdTOM	6	13	31.893	2.12571	0.843	38.3525
bcdTOM/bcdTOM	6	13	33.168	1.48241	0.581	-38.5089
bcdTOM/bcdTOM	6	13	9.565	1.13464	0.24275	34.9507
bcdTOM/bcdTOM	6	13	30.112	0.882819	0.35	-63.0576
bcdTOM/bcdTOM	6	13	24.288	0.769708	0.3025	-15.1376
bcdTOM/bcdTOM	6	13	28.698	1.15758	0.303333	39.6725
bcdTOM/bcdTOM	6	13	19.382	1.15425	0.459	15.734
bcdTOM/bcdTOM	6	14	10.026	1.00444	0.286333	41.6099
bcdTOM/bcdTOM	6	14	14.898	5.14737	0.571143	-65.1028
bcdTOM/bcdTOM	6	14	20.973	1.76962	0.278	-52.8776
bcdTOM/bcdTOM	6	14	12.844	1.8538	0.716	-76.556
bcdTOM/bcdTOM	6	14	6.593	0.982472	0.38	-28.1823
bcdTOM/bcdTOM	6	14	6.509	4.67953	0.4575	61.9016
bcdTOM/bcdTOM	6	14	45.267	1.47205	0.2292	-7.02363
bcdTOM/bcdTOM	6	14	44.28	0.86057	0.2426	50.7059
bcdTOM/bcdTOM	6	14	45.162	0.832606	0.202125	33.7855
bcdTOM/bcdTOM	6	14	21.643	0.754006	0.291	-36.6419
bcdTOM/bcdTOM	6	14	19.521	1.04639	0.284	-2.95811
bcdTOM/bcdTOM	6	14	43.608	0.948996	0.248333	26.8081
bcdTOM/bcdTOM	6	14	43.996	0.652672	0.2575	29.8647
bcdTOM/bcdTOM	6	14	45.052	1.02509	0.1985	8.8099
bcdTOM/bcdTOM	7	15	17.495	2.61004	0.704	-50.0202
bcdTOM/bcdTOM	7	15	7.517	1.80788	0.7242	13.7595
bcdTOM/bcdTOM	7	15	8.522	1.55442	0.5326	-20.6035
bcdTOM/bcdTOM	7	15	8.494	1.21009	1.1295	-58.0699
bcdTOM/bcdTOM	7	15	3.576	0.692752	0.7065	42.8356
bcdTOM/bcdTOM	7	15	14.723	1.4878	0.932333	-28.4599
bcdTOM/bcdTOM	7	15	13.907	1.33322	0.51725	-88.9685
bcdTOM/bcdTOM	7	15	13.38	1.88594	1.18833	67.9504
bcdTOM/bcdTOM	7	15	16.411	4.24289	1.13771	83.6673
bcdTOM/bcdTOM	7	15	13.741	1.19077	1.137	45
bcdTOM/bcdTOM	7	15	19.006	1.2492	0.416111	12.6233
bcdTOM/bcdTOM	7	15	20.848	1.51468	0.72375	-85.494
bcdTOM/bcdTOM	7	15	18.059	0.99389	0.9285	52.3576
bcdTOM/bcdTOM	7	15	19.679	1.2768	0.804667	-46.555
bcdTOM/bcdTOM	7	15	16.987	0.835108	0.277316	2.95149
bcdTOM/bcdTOM	7	15	16.643	0.370342	0.379	-72.3968
bcdTOM/bcdTOM	7	15	16.616	1.36155	0.851	-67.1827
bcdTOM/bcdTOM	7	15	15.061	1.27945	0.8695	87.2673
bcdTOM/bcdTOM	7	15	24.477	2.3611	1.12475	-80.5417
bcdTOM/bcdTOM	7	15	25.163	1.33538	0.658	23.993
bcdTOM/bcdTOM	7	15	26.819	0.656696	0.374333	-31.4875
bcdTOM/bcdTOM	7	15	24.038	2.22745	0.89	-75.8639
bcdTOM/bcdTOM	7	15	23.225	0.875518	0.551	-51.5855
bcdTOM/bcdTOM	7	15	29.087	2.22854	0.3705	84.6962
bcdTOM/bcdTOM	7	15	32.032	0.355928	0.291875	47.1632
bcdTOM/bcdTOM	7	15	30.034	1.32687	0.825667	-29.1343
bcdTOM/bcdTOM	7	15	17.226	0.575142	0.460667	-50.2199
bcdTOM/bcdTOM	7	15	7.584	1.31619	0.637	-18.9305
bcdTOM/bcdTOM	7	15	9.515	0.562694	0.529	-42.4792
bcdTOM/bcdTOM	7	15	31.231	1.16814	0.746	8.26883
bcdTOM/bcdTOM	7	15	25.636	0.366292	0.347	82.3123
bcdTOM/bcdTOM	7	15	26.143	2.08359	0.9715	25.3475
bcdTOM/bcdTOM	7	15	17.236	2.67514	0.806857	-49.0015
bcdTOM/bcdTOM	7	15	16.449	2.88283	0.66675	5.61369
bcdTOM/bcdTOM	7	15	15.644	0.454059	0.438	-27.976
bcdTOM/bcdTOM	7	15	16.159	1.00919	0.632333	15.8128
bcdTOM/bcdTOM	7	15	20.656	1.35812	0.5072	-16.38
bcdTOM/bcdTOM	7	15	19.314	1.467	0.918333	49.5893
bcdTOM/bcdTOM	7	15	16.601	0.609152	0.4416	-83.3066
bcdTOM/bcdTOM	7	15	8.026	0.837153	0.7905	-66.0375
bcdTOM/bcdTOM	7	15	13.693	0.634054	0.428	-4.61355
bcdTOM/bcdTOM	7	15	26.088	1.24778	0.778667	26.0517
bcdTOM/bcdTOM	7	15	25.44	1.43248	0.72425	-79.1764
bcdTOM/bcdTOM	7	15	7.261	0.567776	0.5605	-22.9071
bcdTOM/bcdTOM	7	15	9.59	1.84156	0.453	-58.9082
bcdTOM/bcdTOM	7	15	22.287	4.33318	0.633769	-45.2057
bcdTOM/bcdTOM	7	15	24.017	0.446534	0.471	-47.2689
bcdTOM/bcdTOM	7	15	34.775	1.46543	0.5636	27.8241
bcdTOM/bcdTOM	7	16	16.227	1.79837	0.480333	23.1149
bcdTOM/bcdTOM	7	16	8.731	1.07762	0.431	3.13854
bcdTOM/bcdTOM	7	16	22.89	1.44947	0.3035	24.4963
bcdTOM/bcdTOM	7	16	23.815	1.13509	0.4545	-74.7272
bcdTOM/bcdTOM	7	16	28.209	1.01353	0.406	21.9589
bcdTOM/bcdTOM	7	16	8.525	2.66691	0.53625	-25.9021
bcdTOM/bcdTOM	7	16	16.135	5.9741	0.686857	-46.4379
bcdTOM/bcdTOM	7	16	11.851	1.13158	0.303667	-37.8927
bcdTOM/bcdTOM	7	16	13.268	0.551589	0.222	45.7345
bcdTOM/bcdTOM	7	16	8.841	0.80272	0.321	8.45312
bcdTOM/bcdTOM	7	16	14.286	1.74291	0.6975	10.9811
bcdTOM/bcdTOM	7	16	16.785	5.90365	0.9512	-16.3813
bcdTOM/bcdTOM	7	16	25.982	1.20999	0.4855	32.1008
bcdTOM/bcdTOM	7	16	24.081	1.09728	0.4705	-13.4917
bcdTOM/bcdTOM	7	16	19.414	2.21531	0.89	29.0295
bcdTOM/bcdTOM	7	16	28.426	1.5377	0.371	-55.0904
bcdTOM/bcdTOM	7	16	2.69	2.47711	0.3998	41.3339
bcdTOM/bcdTOM	7	16	26.346	1.7408	0.6985	53.1499
bcdTOM/bcdTOM	7	16	9.33	1.22054	0.349	27.2579
bcdTOM/bcdTOM	7	16	14.519	0.96454	0.395	51.6092
bcdTOM/bcdTOM	7	16	18.007	3.15719	0.849667	-70.4402
bcdTOM/bcdTOM	7	16	22.724	1.52048	0.6085	-21.9763
bcdTOM/bcdTOM	7	16	25.772	3.87199	0.77925	-27.4519
bcdTOM/bcdTOM	7	16	27.953	1.32516	0.354	-24.3795
bcdTOM/bcdTOM	7	16	8.692	0.596041	0.477	12.0075
bcdTOM/bcdTOM	7	16	21.922	1.81484	0.485	-15.5985
bcdTOM/bcdTOM	8	17	23.58	0.260967	0.488	-40.6489
bcdTOM/bcdTOM	8	17	21.075	2.01942	0.435889	-85.0856
bcdTOM/bcdTOM	8	17	18.838	4.72864	1.27186	80.7389
bcdTOM/bcdTOM	8	17	22.731	1.55595	0.984667	61.3925
bcdTOM/bcdTOM	8	17	13.982	3.52917	0.963286	81.7895
bcdTOM/bcdTOM	8	17	14.729	1.18186	1.1145	-23.9625
bcdTOM/bcdTOM	8	17	12.845	1.17551	0.316167	19.9456
bcdTOM/bcdTOM	8	17	4.808	2.60515	0.867	-40.3293
bcdTOM/bcdTOM	8	17	5.058	0.932934	0.876	15.0343
bcdTOM/bcdTOM	8	17	4.742	0.824335	0.513667	39.2894
bcdTOM/bcdTOM	8	17	4.3	2.2663	0.431273	-35.9344
bcdTOM/bcdTOM	8	17	6.085	1.39301	0.868333	-4.85928
bcdTOM/bcdTOM	8	17	4.007	0.802577	0.501667	-51.3736
bcdTOM/bcdTOM	8	17	5.874	1.40149	0.440714	58.896
bcdTOM/bcdTOM	8	17	7.08	1.14921	0.565	-76.6167
bcdTOM/bcdTOM	8	17	10.869	1.10417	0.712	-43.4955
bcdTOM/bcdTOM	8	17	12.685	1.60552	0.75325	6.86828
bcdTOM/bcdTOM	8	17	33.912	2.48663	0.9404	79.1284
bcdTOM/bcdTOM	8	17	22.977	1.30973	0.833333	68.5479
bcdTOM/bcdTOM	8	17	14.327	1.64832	1.547	87.7052
bcdTOM/bcdTOM	8	17	20.492	0.715061	0.463	-76.7411
bcdTOM/bcdTOM	8	17	18.788	0.980849	0.610333	-58.4652
bcdTOM/bcdTOM	8	17	9.239	0.900348	0.841	-51.1315
bcdTOM/bcdTOM	8	17	7.291	1.74364	1.10933	-32.7787
bcdTOM/bcdTOM	8	17	5.855	1.5566	0.985667	-52.2025
bcdTOM/bcdTOM	8	17	4.472	1.99753	0.989667	-28.528
bcdTOM/bcdTOM	8	17	6.723	0.998393	0.9355	21.0128
bcdTOM/bcdTOM	8	17	1.711	0.613013	0.573	-61.5536
bcdTOM/bcdTOM	8	17	10.899	0.681567	0.453	61.3292
bcdTOM/bcdTOM	8	17	5.23	0.719078	0.672	-28.4896
bcdTOM/bcdTOM	8	18	3.539	2.70831	0.462182	-45.4787
bcdTOM/bcdTOM	8	18	6.026	0.369986	0.348	41.0548
bcdTOM/bcdTOM	8	18	2.749	1.27146	0.852	45.6373
bcdTOM/bcdTOM	8	19	6.437	4.31711	0.6698	34.9159
bcdTOM/bcdTOM	8	19	4.766	1.37216	0.353333	-31.0139
bcdTOM/bcdTOM	8	19	5.187	5.08455	0.7842	66.0009
bcdTOM/bcdTOM	8	19	6.633	0.773886	0.303	85.9988
bcdTOM/bcdTOM	8	19	3.524	0.63299	0.2435	-42.0545
bcdTOM/bcdTOM	8	19	15.82	2.04069	0.527333	2.33101
bcdTOM/bcdTOM	8	19	41.504	2.44888	0.629667	16.1704
bcdTOM/bcdTOM	8	19	11.403	1.28268	0.2214	-51.0123
bcdTOM/bcdTOM	8	19	3.601	0.666179	0.174	39.6404
bcdTOM/bcdTOM	8	19	28.555	3.25509	0.853333	47.5025
bcdTOM/bcdTOM	8	19	32.008	2.30638	0.603	-47.3369
bcdTOM/bcdTOM	9	20	20.768	0.388624	0.3735	32.7087
bcdTOM/bcdTOM	9	20	19.916	1.1881	1.0955	44.0452
bcdTOM/bcdTOM	9	20	21.9	2.17771	1.0905	-48.4997
bcdTOM/bcdTOM	9	20	6.164	3.04688	0.819143	22.8875
bcdTOM/bcdTOM	9	20	8.296	1.62812	1.05967	72.4108
bcdTOM/bcdTOM	9	20	2.677	1.81428	0.6762	16.2274
bcdTOM/bcdTOM	9	20	3.713	2.12464	0.5938	24.2609
bcdTOM/bcdTOM	9	20	6.826	4.08297	0.632667	72.6878
bcdTOM/bcdTOM	9	20	8.485	0.547848	0.5255	-32.7038
bcdTOM/bcdTOM	9	20	4.683	0.635857	0.389667	-10.603
bcdTOM/bcdTOM	9	20	6.3	1.1967	0.731	32.6144
bcdTOM/bcdTOM	9	20	28.269	0.706168	0.433667	-72.1039
bcdTOM/bcdTOM	9	20	27.099	1.36892	1.2725	-63.3975
bcdTOM/bcdTOM	9	20	27.445	2.33977	1.0885	-66.5795
bcdTOM/bcdTOM	9	20	22.712	1.62117	1.04533	58.2119
bcdTOM/bcdTOM	9	20	35.608	2.21968	0.597714	13.2036
bcdTOM/bcdTOM	9	20	15.579	5.66084	1.28471	83.2843
bcdTOM/bcdTOM	9	20	8.457	0.666292	0.4555	71.5379
bcdTOM/bcdTOM	9	20	10.536	1.29162	0.355571	41.3904
bcdTOM/bcdTOM	9	20	14.037	0.755201	0.499	53.2363
bcdTOM/bcdTOM	9	20	15.368	0.618561	0.577	60.2436
bcdTOM/bcdTOM	9	20	9.243	2.05112	0.96025	-81.0245
bcdTOM/bcdTOM	9	20	7.159	0.656215	0.6015	-74.7143
bcdTOM/bcdTOM	9	20	7.389	0.564711	0.351	22.1594
bcdTOM/bcdTOM	9	20	5.711	0.754634	0.467667	51.186
bcdTOM/bcdTOM	9	20	4.377	3.33722	0.609125	48.6445
bcdTOM/bcdTOM	9	20	8.046	3.99141	0.929286	7.52919
bcdTOM/bcdTOM	9	20	9.352	1.66695	1.03567	24.9816
bcdTOM/bcdTOM	9	20	4.971	0.771286	0.2688	1.5602
bcdTOM/bcdTOM	9	20	3.906	0.481922	0.469	76.1944
bcdTOM/bcdTOM	9	20	5.458	0.560889	0.517	4.70426
bcdTOM/bcdTOM	9	20	10.105	1.22753	0.776667	14.5796
bcdTOM/bcdTOM	9	20	11.126	0.703143	0.657	9.74364
bcdTOM/bcdTOM	9	20	28.859	0.653423	0.6075	-62.7683
bcdTOM/bcdTOM	9	20	29.918	0.820664	0.504	-59.623
bcdTOM/bcdTOM	9	20	12.955	1.4296	0.899667	-20.0447
bcdTOM/bcdTOM	9	20	10.065	1.1157	0.698333	41.0023
bcdTOM/bcdTOM	9	20	9.024	0.91846	0.568333	73.3605
bcdTOM/bcdTOM	9	20	9.297	0.515563	0.337333	-46.0216
bcdTOM/bcdTOM	9	20	17.567	2.73671	0.8395	12.7718
bcdTOM/bcdTOM	9	20	13.855	1.96612	0.9145	-41.3915
bcdTOM/bcdTOM	9	20	9.07	1.27581	0.61125	73.9374
bcdTOM/bcdTOM	9	20	6.597	1.47334	0.905333	-59.0829
bcdTOM/bcdTOM	9	20	1.289	0.989353	0.621	-29.1559
bcdTOM/bcdTOM	9	20	3.572	0.493024	0.4655	-24.9537
bcdTOM/bcdTOM	9	20	1.998	0.565828	0.26025	53.6972
bcdTOM/bcdTOM	9	20	4.835	1.23178	0.753667	45.1316
bcdTOM/bcdTOM	9	20	19.287	1.25757	0.775	-13.6605
bcdTOM/bcdTOM	9	20	26.107	1.26769	0.4936	48.1976
bcdTOM/bcdTOM	9	20	27.062	1.20377	0.4562	22.5173
bcdTOM/bcdTOM	9	20	12.525	1.16065	0.53375	-70.0506
bcdTOM/bcdTOM	9	20	26.034	1.43465	1.3155	5.92121
bcdTOM/bcdTOM	9	20	27.562	2.606	1.213	-85.5102
bcdTOM/bcdTOM	9	20	19.543	1.01051	0.631	39.2974
bcdTOM/bcdTOM	9	20	6.382	1.27705	0.793667	9.37381
bcdTOM/bcdTOM	9	20	11.553	2.27004	0.36	47.1779
bcdTOM/bcdTOM	9	20	9.075	1.85218	1.134	-20.5778
bcdTOM/bcdTOM	9	20	30.629	1.12547	0.688667	-53.7817
bcdTOM/bcdTOM	9	20	36.167	0.418208	0.383	-70.0052
bcdTOM/bcdTOM	9	20	26.911	2.15288	1.975	-85.0971
bcdTOM/bcdTOM	9	20	35.436	0.704119	0.490667	-62.052
bcdTOM/bcdTOM	9	20	26.989	0.632179	0.662	45.5127
bcdTOM/bcdTOM	9	20	23.55	0.599955	0.583	55.5948
bcdTOM/bcdTOM	9	20	7.854	1.5711	0.969	78.9547
bcdTOM/bcdTOM	9	20	14.879	1.16569	0.4586	-1.96646
bcdTOM/bcdTOM	9	21	13.223	1.28261	0.333	-31.8065
bcdTOM/bcdTOM	9	21	12.617	3.11106	0.59675	-33.4755
bcdTOM/bcdTOM	9	21	4.392	1.28783	0.324	-44.0247
bcdTOM/bcdTOM	9	21	13.849	3.46753	0.5244	-32.8514
bcdTOM/bcdTOM	9	21	9.18	2.75675	0.5265	-55.2838
bcdTOM/bcdTOM	9	21	15.69	0.114127	0.2158	-61.1892
bcdTOM/bcdTOM	9	21	5.645	0.898223	0.3435	1.27586
bcdTOM/bcdTOM	9	21	10.74	2.51047	0.9465	-88.0369
bcdTOM/bcdTOM	9	21	13.856	1.65389	0.6315	-38.5191
bcdTOM/bcdTOM	9	21	9.024	1.08196	0.4145	35.0267
bcdTOM/bcdTOM	9	21	10.983	2.29409	0.577667	4.17459
bcdTOM/bcdTOM	9	21	15.175	0.681091	0.2575	-22.9887
bcdTOM/bcdTOM	9	21	11.562	1.33605	0.511	66.5818
bcdTOM/bcdTOM	9	21	12.852	2.45541	0.3746	-73.0705
bcdTOM/bcdTOM	9	21	5.152	0.908644	0.343	80.8176
bcdTOM/bcdTOM	9	21	6.556	0.52256	0.1105	-33.0514
bcdTOM/bcdTOM	9	21	18.507	1.18336	0.4465	-65.0592
bcdTOM/bcdTOM	9	21	26.284	1.96043	0.7405	14.9578
bcdTOM/bcdTOM	9	21	22.969	1.91096	0.487667	13.7745
bcdTOM/bcdTOM	9	21	24.23	1.51697	0.578	-71.9114
bcdTOM/bcdTOM	9	21	12.846	1.81854	0.458333	-15.6641
bcdTOM/bcdTOM	9	21	4.409	1.24021	0.47	42.3203
bcdTOM/bcdTOM	9	21	14.454	0.646586	0.2435	-83.9632
bcdTOM/bcdTOM	9	21	10.544	0.754303	0.208	-13.6494
bcdTOM/bcdTOM	9	21	30.057	0.743334	0.28	-81.4121
bcdTOM/bcdTOM	9	21	6.306	0.315057	0.0846667	13.7716
bcdTOM/bcdTOM	9	21	22.01	1.40899	0.538	-76.664
bcdTOM/bcdTOM	10	22	19.194	1.91144	0.7545	38.3508
bcdTOM/bcdTOM	10	22	12.866	2.24962	0.7136	-88.65
bcdTOM/bcdTOM	10	22	4.794	1.20087	0.95	-64.1818
bcdTOM/bcdTOM	10	22	3.748	0.694208	0.543	17.5214
bcdTOM/bcdTOM	10	22	8.42	0.499797	0.3995	-24.7191
bcdTOM/bcdTOM	10	22	7.444	0.609016	0.476	66.3814
bcdTOM/bcdTOM	10	22	16.187	1.94883	0.616	-11.604
bcdTOM/bcdTOM	10	22	17.024	0.760263	0.396333	-63.4349
bcdTOM/bcdTOM	10	22	15.429	2.66014	1.386	-79.4293
bcdTOM/bcdTOM	10	22	5.492	1.71003	0.556	-50.7907
bcdTOM/bcdTOM	10	22	5.387	1.56939	1.2245	1.2779
bcdTOM/bcdTOM	10	22	21.861	2.5825	1.0205	-31.7514
bcdTOM/bcdTOM	11	22	1.647	3.75407	0.839429	22.1103
bcdTOM/bcdTOM	11	22	41.056	2.37531	1.239	61.7303
bcdTOM/bcdTOM	11	22	36.584	1.26425	1.0125	-24.4365
bcdTOM/bcdTOM	11	22	0.872	1.84315	0.71975	-10.3771
bcdTOM/bcdTOM	11	22	0.732	0.819793	0.425333	-51.886
bcdTOM/bcdTOM	11	22	2.223	0.748647	0.446	-12.1054
bcdTOM/bcdTOM	11	22	0.523	0.543493	0.4595	5.49031
bcdTOM/bcdTOM	12	22	16.448	2.61899	1.01775	-63.9535
bcdTOM/bcdTOM	12	22	14.906	1.59803	0.821333	-68.911
bcdTOM/bcdTOM	12	22	18.593	1.98342	1.55	-41.2593
bcdTOM/bcdTOM	12	22	21.844	1.46463	0.791	38.2627
bcdTOM/bcdTOM	12	22	28.678	1.5217	0.61675	20.1021
bcdTOM/bcdTOM	12	22	10.669	1.43592	0.5775	-10.4726
bcdTOM/bcdTOM	12	22	1.7	5.49949	0.957333	2.99143
bcdTOM/bcdTOM	12	22	2.667	2.10869	0.550167	17.3265
bcdTOM/bcdTOM	12	22	2.785	1.84629	0.71025	-2.85621
bcdTOM/bcdTOM	12	22	9.222	0.20969	0.1835	-48.4799
bcdTOM/bcdTOM	12	22	8.961	0.456242	0.32	-46.5098
bcdTOM/bcdTOM	12	22	8.107	2.27706	0.518286	33.4458
bcdTOM/bcdTOM	12	22	2.772	0.652347	0.502	-34.1285
bcdTOM/bcdTOM	12	22	2.981	0.891166	0.495667	-49.7334
bcdTOM/bcdTOM	12	22	2.693	0.41814	0.333	-75.5982
bcdTOM/bcdTOM	12	22	2.327	0.925433	0.474	-36.387
bcdTOM/bcdTOM	12	22	19.011	2.00202	0.539	-70.144
bcdTOM/bcdTOM	12	22	16.448	1.45355	0.5705	37.7056
bcdTOM/bcdTOM	12	22	20.737	0.847189	0.455	81.1047
bcdTOM/bcdTOM	12	22	18.497	2.58408	1.00525	-74.7429
bcdTOM/bcdTOM	12	22	8.577	3.99579	1.2428	56.2145
bcdTOM/bcdTOM	12	22	11.898	2.27456	0.602	8.59678
bcdTOM/bcdTOM	12	22	14.278	1.15129	0.885	-1.29404
bcdTOM/bcdTOM	12	22	4.986	1.094	0.44325	-22.4627
bcdTOM/bcdTOM	12	22	8.473	0.78091	0.408667	-23.7092
bcdTOM/bcdTOM	12	22	10.129	0.912064	0.7565	83.3893
bcdTOM/bcdTOM	12	22	7.409	0.873808	0.6905	-4.59484
bcdTOM/bcdTOM	12	22	8.107	0.828785	0.648	-75.3937
bcdTOM/bcdTOM	12	22	2.131	0.805184	0.637	-42.9869
bcdTOM/bcdTOM	12	22	1.647	0.806551	0.414	40.4241
bcdTOM/bcdTOM	12	22	1.425	0.837	0.648	90
bcdTOM/bcdTOM	12	22	3.805	1.14158	0.588333	-50.1173
bcdTOM/bcdTOM	12	22	16.814	1.23014	0.9465	-87.5307
bcdTOM/bcdTOM	12	22	19.979	0.617224	0.4755	-53.6314
bcdTOM/bcdTOM	12	22	8.29	0.539157	0.4275	22.8079
bcdTOM/bcdTOM	12	22	33.132	0.921005	0.480667	-6.54629
bcdTOM/bcdTOM	12	22	33.08	10.6854	1.05475	34.7654
bcdTOM/bcdTOM	12	22	1.961	1.82541	0.938	25.4701
bcdTOM/bcdTOM	12	22	2.275	0.78075	0.603	13.5557
bcdTOM/bcdTOM	12	22	18.113	1.00257	0.774	-15.0897
bcdTOM/bcdTOM	12	22	3.896	0.587242	0.454	-18.1573
bcdTOM/bcdTOM	12	22	5.474	1.66393	0.855667	33.0311
bcdTOM/bcdTOM	12	22	4.69	1.55253	0.798333	87.4527
bcdTOM/bcdTOM	12	22	2.022	0.966708	0.753	-27.9435
bcdTOM/bcdTOM	13	22	1.586	1.70033	0.5248	26.8514
bcdTOM/bcdTOM	13	22	19.682	2.22537	1.712	-57.7954
bcdTOM/bcdTOM	13	22	5.736	1.80858	1.392	63.0382
bcdTOM/bcdTOM	13	22	2.249	1.80128	0.69	62.3111
bcdTOM/bcdTOM	13	22	2.667	0.597001	0.4565	-6.63695
bcdTOM/bcdTOM	13	22	3.26	1.70574	1.304	40.8636
bcdTOM/bcdTOM	13	22	1.656	0.453154	0.347	22.7171
bcdTOM/bcdTOM	13	22	10.199	1.15744	0.897	83.5013
bcdTOM/bcdTOM	13	22	6.084	1.58109	0.832667	75.9813
bcdTOM/bcdTOM	13	22	5.213	1.79024	1.3975	6.70423
bcdTOM/bcdTOM	14	22	3.168	2.06878	1.02	18.6627
bcdTOM/bcdTOM	14	22	13.032	1.26763	0.626667	-61.0288
bcdTOM/bcdTOM	14	22	11.655	1.33472	0.986	72.6511
bcdTOM/bcdTOM	14	22	4.553	1.62721	0.391571	-42.4845
bcdTOM/bcdTOM	14	22	8.94	1.11186	0.814	-43.6881
bcdTOM/bcdTOM	14	22	9.801	1.16099	0.8565	56.3099
bcdTOM/bcdTOM	14	22	5.271	1.83947	0.677	12.3362
bcdTOM/bcdTOM	14	22	4.781	2.67158	0.9885	75.6309
bcdTOM/bcdTOM	14	22	5.431	0.951187	0.6985	-10.9083
bcdTOM/bcdTOM	14	22	6.692	1.70245	0.522	64.609
bcdTOM/bcdTOM	14	22	2.748	1.5746	1.163	-2.58439
bcdTOM/bcdTOM	14	22	11.843	1.37405	0.672667	33.1812
bcdTOM/bcdTOM	14	22	13.4	1.44048	1.247	55.3501
bcdTOM/bcdTOM	14	22	12.965	1.70626	0.858	-43.3377
bcdTOM/bcdTOM	14	22	2.768	1.84823	0.926667	22.6246
bcdTOM/bcdTOM	14	22	5.608	4.0037	1.1756	27.1987
bcdTOM/bcdTOM	14	22	3.435	2.15252	1.05567	-23.4328
bcdTOM/bcdTOM	14	22	25.376	0.877565	0.434667	-80.6879
bcdTOM/bcdTOM	14	22	7.743	2.58201	0.95575	-89.8225
bcdTOM/bcdTOM	14	22	3.254	1.23393	0.9035	-49.7664
bcdTOM/bcdTOM	14	22	2.999	0.916472	0.72	-83.7358
bcdTOM/bcdTOM	14	22	6.171	2.36455	1.163	-35.0813
bcdTOM/bcdTOM	14	22	7.217	0.949558	0.3248	69.5993
bcdTOM/bcdTOM	14	22	3.853	0.642548	0.5005	-49.418
bcdTOM/bcdTOM	14	22	8.63	0.915459	0.674	-59.0362
bcdTOM/bcdTOM	14	22	7.845	14.0714	0.5012	-29.1353
bcdTOM/bcdTOM	14	22	4.446	2.42278	0.89525	32.6471
bcdTOM/bcdTOM	14	22	10.669	0.885863	0.445667	-53.8157
bcdTOM/bcdTOM	14	22	26.83	2.10428	0.6314	-83.8071
bcdTOM/bcdTOM	14	22	25.017	1.08157	0.528	-88.1456
bcdTOM/bcdTOM	14	22	15.062	1.0787	0.7985	22.8568
bcdTOM/bcdTOM	14	22	16.213	5.65407	1.39767	87.3441
bcdTOM/bcdTOM	14	22	6.956	1.01509	0.7855	-74.0469
bcdTOM/bcdTOM	14	22	4.55	1.65387	0.623	71.5651
bcdTOM/bcdTOM	14	22	2.842	3.19615	0.591	9.09098
bcdTOM/bcdTOM	14	22	3.347	8.64412	0.42475	-7.99981
bcdTOM/bcdTOM	14	22	1.621	0.533436	0.321333	78.6479
bcdTOM/bcdTOM	14	22	5.858	1.30824	0.9625	-16.2462
bcdTOM/bcdTOM	14	22	1.831	0.797873	0.602	58.3219
bcdTOM/bcdTOM	14	22	11.454	0.661233	0.4865	71.4828
bcdTOM/bcdTOM	14	22	8.769	1.66818	1.221	-63.9726
bcdTOM/bcdTOM	14	22	7.095	1.39676	1.0655	2.87265
bcdTOM/bcdTOM	14	22	7.505	1.8461	0.6875	-12.2595
bcdTOM/bcdTOM	14	22	3.033	0.597013	0.446	74.7533
bcdTOM/bcdTOM	14	22	0.75	1.16476	0.9445	51.0636
bcdTOM/bcdTOM	14	22	4.045	1.58069	1.16	55.7771
bcdTOM/bcdTOM	14	22	9.702	0.456304	0.225333	66.3562
bcdTOM/bcdTOM	14	22	3.434	0.596208	0.444	20.6235
bcdTOM/bcdTOM	14	22	8.281	0.725516	0.5335	54.8204
bcdTOM/bcdTOM	14	22	3.086	1.58061	1.158	41.4349
bcdTOM/bcdTOM	14	22	3.766	1.19114	0.8735	8.83759
bcdTOM/bcdTOM	14	22	2.354	0.854153	0.484333	66.6164
bcdTOM/bcdTOM	14	22	4.411	0.803545	0.592	-55.598
bcdTOM/bcdTOM	14	22	0.854	0.272591	0.218	39.9401
bcdTOM/bcdTOM	14	22	4.097	1.2364	0.947	-40.4405
bcdTOM/bcdTOM	14	22	2.589	0.729332	0.534	-75.4684
bcdTOM/bcdTOM	14	22	2.38	0.986116	0.722	57.97
bcdTOM/bcdTOM	14	22	2.981	0.903421	0.452667	-67.8924
bcdTOM/bcdTOM	14	22	2.615	2.11273	1.04233	31.3126
bcdTOM/bcdTOM	14	22	3.365	0.253842	0.1885	-16.0074
bcdTOM/bcdTOM	14	22	1.491	1.40141	0.698333	-36.6737
bcdTOM/bcdTOM	14	22	1.621	0.863046	0.425667	-43.3098
bcdTOM/bcdTOM	14	22	13.302	0.499797	0.3655	-65.2809
bcdTOM/bcdTOM	14	22	13.833	0.538624	0.405	22.9472
bcdTOM/bcdTOM	14	22	3.243	0.842444	1.234	7.09127
bcdTOM/bcdTOM	14	22	3.975	2.85477	1.41	8.41962
bcdTOM/bcdTOM	14	23	20.693	2.18423	1.057	16.7093
bcdTOM/bcdTOM	14	23	10.931	9.00177	1.21936	87.7781
bcdTOM/bcdTOM	14	23	20.903	2.581	0.959	-90
bcdTOM/bcdTOM	14	23	17.834	2.3849	0.7256	-15.2425
bcdTOM/bcdTOM	14	23	15.882	3.37624	1.23475	-51.7112
bcdTOM/bcdTOM	14	23	3.4	1.93355	1.0618	-25.6506
bcdTOM/bcdTOM	14	23	15.254	1.59262	0.838667	-66.8156
bcdTOM/bcdTOM	14	23	4.48	0.964148	0.372	-77.4196
bcdTOM/bcdTOM	14	23	9.885	1.61001	0.779333	4.95278
bcdTOM/bcdTOM	14	23	13.023	1.10237	0.654667	71.5979
bcdTOM/bcdTOM	14	23	11.314	2.26608	0.6594	30.5258
bcdTOM/bcdTOM	14	23	17.242	1.30168	0.499	-82.3181
bcdTOM/bcdTOM	14	23	9.71	2.0519	0.7505	9.79284
bcdTOM/bcdTOM	14	23	15.638	0.813956	0.400667	-80.1674
bcdTOM/bcdTOM	14	23	9.222	2.6314	1.28733	55.247
bcdTOM/bcdTOM	14	23	16.963	0.753369	0.366	13.3537
bcdTOM/bcdTOM	14	23	36.532	0.837	0.606	-90
bcdTOM/bcdTOM	14	23	6.015	2.33702	0.8645	88.3081
bcdTOM/bcdTOM	14	23	3.4	1.40865	1.02	-15.1017
bcdTOM/bcdTOM	14	23	11.977	2.35218	0.8655	78.026
bcdTOM/bcdTOM	15	24	15.952	0.970895	0.7315	68.9328
bcdTOM/bcdTOM	15	24	10.233	1.59977	0.582	-73.5134
bcdTOM/bcdTOM	15	24	6.747	2.31574	1.6965	-71.5729
bcdTOM/bcdTOM	15	24	3.33	0.804876	0.398	-72.353
bcdTOM/bcdTOM	15	24	1.909	0.947114	0.2788	50.6127
bcdTOM/bcdTOM	15	24	4.106	1.19363	0.872	-61.2018
bcdTOM/bcdTOM	15	24	4.515	1.01688	0.7465	67.8742
bcdTOM/bcdTOM	15	24	2.759	1.01446	0.746	21.9378
bcdTOM/bcdTOM	15	24	10.547	0.837731	0.6215	87.6055
bcdTOM/bcdTOM	15	24	3.033	0.757476	0.553	-14.605
bcdTOM/bcdTOM	15	24	5.3	0.800546	0.2955	-78.6901
bcdTOM/bcdTOM	15	24	8.107	2.88288	0.707	-3.6594
bcdTOM/bcdTOM	15	24	4.969	2.10822	1.532	7.11153
bcdTOM/bcdTOM	15	24	8.185	3.61445	1.0564	-52.0458
bcdTOM/bcdTOM	15	24	6.799	1.1253	0.819	1.32393
bcdTOM/bcdTOM	15	24	2.641	0.658635	0.4865	-6.80131
bcdTOM/bcdTOM	15	24	3.216	1.83882	0.67625	-29.8415
bcdTOM/bcdTOM	15	24	2.667	3.65579	1.0788	32.9424
bcdTOM/bcdTOM	15	24	6.224	1.20986	0.45	-11.635
bcdTOM/bcdTOM	15	24	3.504	0.718391	0.354	-75.9831
bcdTOM/bcdTOM	15	24	15.777	1.46784	0.739667	52.7241
bcdTOM/bcdTOM	15	24	3.539	1.59836	1.161	39.2364
bcdTOM/bcdTOM	15	24	6.276	0.982367	0.486	-25.1825
bcdTOM/bcdTOM	15	24	2.022	1.76709	1.303	22.0362
bcdTOM/bcdTOM	15	24	8.969	1.07326	0.3915	-87.2229
bcdTOM/bcdTOM	15	24	6.084	0.951488	0.711	-66.2637
bcdTOM/bcdTOM	15	24	4.315	0.909787	0.6835	71.5451
bcdTOM/bcdTOM	15	24	3.208	0.769172	0.378	76.8491
bcdTOM/bcdTOM	15	24	3.739	0.544629	0.396	35.2075
bcdTOM/bcdTOM	15	24	4.602	0.979529	0.712	-43.8832
bcdTOM/bcdTOM	15	24	3.687	0.970976	0.727	27.2776
bcdTOM/bcdTOM	15	24	5.77	1.14534	0.8325	-26.1624
bcdTOM/bcdTOM	15	24	2.911	0.604003	0.2305	-43.7925
bcdTOM/bcdTOM	16	24	6.041	3.43539	0.8625	-74.1027
bcdTOM/bcdTOM	16	24	3.853	2.57794	0.370833	66.886
bcdTOM/bcdTOM	16	24	17.625	2.8455	1.42	-53.9637
bcdTOM/bcdTOM	16	24	1.935	2.04668	0.934	66.9301
bcdTOM/bcdTOM	16	24	12.674	1.01383	0.747	40.8404
bcdTOM/bcdTOM	16	24	5.204	3.34791	0.839167	1.33501
bcdTOM/bcdTOM	16	24	23.613	2.0253	0.773333	-78.8399
bcdTOM/bcdTOM	16	24	13.581	1.22403	0.45325	24.3665
bcdTOM/bcdTOM	16	24	5.858	3.43243	1.024	-3.50761
bcdTOM/bcdTOM	16	24	5.125	1.25127	0.621333	-10.825
bcdTOM/bcdTOM	16	24	10.146	2.96663	1.097	-80.8647
bcdTOM/bcdTOM	16	24	3.243	1.54096	0.761667	-14.7757
bcdTOM/bcdTOM	16	24	3.888	0.836	0.425667	0
bcdTOM/bcdTOM	16	24	11.907	0.966729	0.712	-82.75
bcdTOM/bcdTOM	16	24	13.04	2.43526	0.958	-49.363
bcdTOM/bcdTOM	16	24	9.954	2.03657	0.75375	32.0591
bcdTOM/bcdTOM	16	24	12.36	1.14162	0.561667	-82.9559
bcdTOM/bcdTOM	16	24	9.309	2.74187	1.35467	22.8337
bcdTOM/bcdTOM	16	24	12.569	1.93822	0.966667	-78.6031
bcdTOM/bcdTOM	16	24	14.958	2.55636	0.94825	-7.05552
bcdTOM/bcdTOM	16	24	6.328	1.10305	0.578	53.7015
bcdTOM/bcdTOM	16	24	3.452	1.20559	0.619333	12.503
bcdTOM/bcdTOM	16	24	1.059	0.668483	0.131778	23.0748
bcdTOM/bcdTOM	16	24	4.446	0.791991	0.5865	-7.61855
bcdTOM/bcdTOM	16	24	8.263	1.87537	0.921	-77.3718
bcdTOM/bcdTOM	16	24	9.859	1.1844	0.8755	-59.4511
bcdTOM/bcdTOM	16	24	3.504	0.628244	0.4705	16.9351
bcdTOM/bcdTOM	16	24	4.045	0.349414	0.264	2.78871
bcdTOM/bcdTOM	16	24	4.681	0.915369	0.451333	1.62764
bcdTOM/bcdTOM	16	24	4.55	0.632453	0.209	60.2326
bcdTOM/bcdTOM	16	24	1.586	1.15589	0.43775	23.127
bcdTOM/bcdTOM	16	24	3.452	0.947749	0.697	-50.566
bcdTOM/bcdTOM	17	25	10.094	1.23099	0.51425	-77.759
bcdTOM/bcdTOM	17	25	4.446	1.25612	0.6	-2.41823
bcdTOM/bcdTOM	17	25	22.402	0.736098	0.5285	-58.5557
bcdTOM/bcdTOM	17	25	19.787	1.00604	0.713	-75.9638
bcdTOM/bcdTOM	17	25	22.228	0.5222	0.378	36.826
bcdTOM/bcdTOM	17	25	24.354	1.40551	0.682	-66.6087
bcdTOM/bcdTOM	17	25	11.323	0.902358	0.6555	-60.452
bcdTOM/bcdTOM	17	25	3.609	1.09395	0.778	84.5448
bcdTOM/bcdTOM	17	25	1.556	0.619333	0.44	42.4479
bcdTOM/bcdTOM	17	25	4.106	1.26196	0.8985	55.9825
bcdTOM/bcdTOM	17	25	6.956	1.68812	1.2	-38.2888
bcdTOM/bcdTOM	17	25	26.795	1.70077	1.251	-45.8338
bcdTOM/bcdTOM	17	25	9.414	0.723246	0.5265	-12.5374
bcdTOM/bcdTOM	18	26	10.373	1.99072	0.970333	-87.0054
bcdTOM/bcdTOM	18	26	17.242	4.18739	1.5235	39.2432
bcdTOM/bcdTOM	18	26	36.715	2.15684	1.04133	83.7449
bcdTOM/bcdTOM	18	26	38.911	0.497733	0.382	-86.8904
bcdTOM/bcdTOM	18	26	12.186	2.9239	1.41133	42.8102
bcdTOM/bcdTOM	18	26	6.721	1.45236	0.717667	-13.5387
bcdTOM/bcdTOM	18	26	19.979	1.37023	0.508	13.2046
bcdTOM/bcdTOM	18	26	4.655	1.09123	0.788	-46.0025
bcdTOM/bcdTOM	18	26	1.987	1.16828	0.567667	-40.4524
bcdTOM/bcdTOM	18	26	2.798	1.03654	0.412	-46.9938
bcdTOM/bcdTOM	18	26	10.094	1.07651	0.552	-64.0538
bcdTOM/bcdTOM	18	26	4.585	0.926804	0.669	73.5791
bcdTOM/bcdTOM	18	26	4.254	0.670776	0.327667	-65.4217
bcdTOM/bcdTOM	18	26	3.957	1.59759	0.58625	-39.2591
bcdTOM/bcdTOM	18	26	8.263	1.17958	0.854	86.2085
bcdTOM/bcdTOM	18	26	2.981	1.11499	0.8075	39.2858
bcdTOM/bcdTOM	18	27	29.916	1.07739	0.801	67.1715
bcdTOM/bcdTOM	18	27	2.51	2.01571	0.383625	-22.8888
bcdTOM/bcdTOM	18	27	13.18	1.82106	0.526	50.839
bcdTOM/bcdTOM	18	27	9.466	1.65381	0.795667	-34.6798
bcdTOM/bcdTOM	18	27	3.086	2.4183	0.7216	33.2235
bcdTOM/bcdTOM	18	27	5.753	2.62575	1.272	-44.1822
bcdTOM/bcdTOM	18	27	29.785	1.86827	0.68175	-44.4362
bcdTOM/bcdTOM	18	27	7.479	0.580293	0.4155	-32.759
bcdTOM/bcdTOM	18	27	1.857	0.563586	0.4065	-21.8769
bcdTOM/bcdTOM	18	27	1.935	1.36025	0.663333	-1.09523
bcdTOM/bcdTOM	18	27	2.746	0.638346	0.318333	55.0153
bcdTOM/bcdTOM	18	27	0.994	1.46423	0.702667	88.9826
bcdTOM/bcdTOM	18	27	4.01	0.594032	0.433	3.37779
bcdTOM/bcdTOM	18	27	2.197	0.52417	0.254333	-3.82862
bcdTOM/bcdTOM	18	27	4.367	1.17091	0.8385	29.4111
bcdTOM/bcdTOM	18	27	1.543	0.85455	0.612	23.4451
bcdTOM/bcdTOM	19	28	7.095	2.18074	0.533167	-50.8437
bcdTOM/bcdTOM	19	28	6.259	1.14787	0.550667	41.9279
bcdTOM/bcdTOM	19	28	2.929	2.42698	0.508	3.28328
bcdTOM/bcdTOM	19	28	2.197	2.28697	1.08767	23.8302
bcdTOM/bcdTOM	19	28	5.282	1.12405	0.803	77.8803
bcdTOM/bcdTOM	19	28	4.053	1.98077	0.70525	-67.5003
bcdTOM/bcdTOM	19	28	13.807	3.11224	1.1055	-52.1654
bcdTOM/bcdTOM	19	28	16.239	0.844171	0.608	-68.2364
bcdTOM/bcdTOM	19	28	1.935	1.10233	0.4405	67.716
bcdTOM/bcdTOM	19	28	1.909	1.41806	1.011	5.30051
bcdTOM/bcdTOM	19	28	5.282	1.66674	1.193	-74.2293
bcdTOM/bcdTOM	19	28	3.269	0.995359	0.7285	2.99463
bcdTOM/bcdTOM	19	28	1.726	1.14669	0.550667	78.5823
bcdTOM/bcdTOM	19	28	19.534	1.27355	0.604	70.8395
bcdTOM/bcdTOM	19	28	1.831	2.3611	0.482714	4.44523
bcdTOM/bcdTOM	19	28	2.144	2.08242	0.74475	-7.2001
bcdTOM/bcdTOM	19	28	22.716	3.01989	1.0745	-53.9308
bcdTOM/bcdTOM	19	28	6.677	1.23445	0.606333	-36.3686
bcdTOM/bcdTOM	19	28	2.859	1.09162	0.39475	-12.9159
bcdTOM/bcdTOM	19	28	10.39	2.63206	0.95525	-89.6082
bcdTOM/bcdTOM	19	28	2.545	1.37167	0.985	-11.7359
bcdTOM/bcdTOM	19	28	2.301	2.11241	1.504	-10.9429
bcdTOM/bcdTOM	19	28	2.563	1.3088	0.929	-41.779
bcdTOM/bcdTOM	19	28	3.365	1.09507	0.776	80.8043
bcdTOM/bcdTOM	19	28	2.493	1.66881	1.1925	10.8453
bcdTOM/bcdTOM	19	28	2.04	1.29794	0.922	-9.26638
bcdTOM/bcdTOM	19	28	3.321	4.34149	0.78225	89.1421
bcdTOM/bcdTOM	19	28	8.752	0.878866	0.6275	50.5867
bcdTOM/bcdTOM	19	28	5.831	1.12625	0.801	2.69727
bcdTOM/bcdTOM	19	28	1.987	0.898455	0.6535	-8.31949
bcdTOM/bcdTOM	19	28	1.857	0.577437	0.41	-5.2663
bcdTOM/bcdTOM	19	28	1.36	0.783604	0.605	25.7148
bcdTOM/bcdTOM	19	29	14.452	1.65113	1.169	-10.9629
bcdTOM/bcdTOM	19	29	0.575	1.36308	0.367429	14.444
bcdTOM/bcdTOM	19	29	1.883	2.16958	0.77125	-15.3686
bcdTOM/bcdTOM	19	29	4.114	1.15278	0.8275	72.4295
bcdTOM/bcdTOM	19	29	3.748	0.662925	0.475	-86.9736
bcdTOM/bcdTOM	19	29	0.889	4.39314	1.0495	0.456478
bcdTOM/bcdTOM	19	29	0.863	1.2132	0.293667	7.43548
bcdTOM/bcdTOM	19	29	21.652	0.637248	0.303	70.8542
bcdTOM/bcdTOM	19	29	8.786	1.22927	0.5	-1.21193
bcdTOM/bcdTOM	19	29	3.051	1.98941	0.477667	-11.1292
bcdTOM/bcdTOM	19	29	9.414	2.27019	1.608	-28.9247
bcdTOM/bcdTOM	19	29	18.383	0.889756	0.638	-49.741
bcdTOM/bcdTOM	19	29	14.984	0.608313	0.449	-25.5119
bcdTOM/bcdTOM	19	29	5.77	0.650696	0.4665	-74.49
bcdTOM/bcdTOM	19	29	0.706	1.18044	0.8355	12.8236
bcdTOM/bcdTOM	19	29	0.785	1.47976	1.0485	31.9931
bcdTOM/bcdTOM	19	29	9.815	0.490763	0.3485	-83.9177
bcdTOM/bcdTOM	19	29	0.68	0.602	0.2975	0
bcdTOM/bcdTOM	19	29	2.981	1.52731	0.54625	-38.0329
bcdTOM/bcdTOM	19	29	7.584	0.78543	0.556	1.897
bcdTOM/bcdTOM	20	30	6.538	1.79113	0.72775	56.2922
bcdTOM/bcdTOM	20	30	16.841	1.24924	0.49425	37.3561
bcdTOM/bcdTOM	20	30	7.217	0.907525	0.716	-41.471
bcdTOM/bcdTOM	20	30	6.093	0.546057	0.443	-16.7093
bcdTOM/bcdTOM	20	30	4.969	2.59254	0.829	-30.9675
bcdTOM/bcdTOM	20	30	3.347	1.53924	0.623	-20.8959
bcdTOM/bcdTOM	20	30	11.977	1.53233	0.808333	62.5654
bcdTOM/bcdTOM	20	30	21.774	0.879755	0.7055	-56.3099
bcdTOM/bcdTOM	20	30	5.736	0.455271	0.37	4.28288
bcdTOM/bcdTOM	20	30	6.363	1.29708	0.689333	-36.2515
bcdTOM/bcdTOM	20	30	3.713	0.694208	0.5565	-72.4786
bcdTOM/bcdTOM	20	30	5.666	1.06024	0.43825	43.6624
bcdTOM/bcdTOM	20	30	5.736	0.280815	0.23	60.331
bcdTOM/bcdTOM	20	30	6.851	1.43668	0.761667	-39.0958
bcdTOM/bcdTOM	20	30	5.953	2.3322	0.631833	-83.6734
bcdTOM/bcdTOM	20	30	2.964	0.832658	0.664	-33.0412
bcdTOM/bcdTOM	20	30	3.147	0.619989	0.494	-86.7638
bcdTOM/bcdTOM	20	30	1.412	0.574415	0.4655	-59.9087
bcdTOM/bcdTOM	20	30	2.824	0.589619	0.5	87.3754
bcdTOM/bcdTOM	20	30	2.014	0.491498	0.1574	79.3302
bcdTOM/bcdTOM	20	30	4.864	1.08326	0.881	-3.70501
bcdTOM/bcdTOM	20	30	2.563	0.757117	0.24	-19.2008
bcdTOM/bcdTOM	20	30	3.334	1.02597	0.544	70.6467
bcdTOM/bcdTOM	20	30	2.955	0.796505	0.6305	-23.2175
bcdTOM/bcdTOM	20	30	35.25	3.75524	1.187	70.0547
bcdTOM/bcdTOM	20	30	2.327	1.24664	0.9875	80.3488
bcdTOM/bcdTOM	20	30	3.905	1.36205	1.0745	-9.59372
bcdTOM/bcdTOM	20	30	7.514	1.0552	0.8325	7.56953
bcdTOM/bcdTOM	20	30	7.444	1.08157	0.857	-88.1456
bcdTOM/bcdTOM	20	30	7.723	1.04056	0.567	-50.42
bcdTOM/bcdTOM	20	30	0.771	0.798106	0.476	89.0667
bcdTOM/bcdTOM	20	30	1.687	0.721932	0.577	-84.8343
bcdTOM/bcdTOM	20	31	12.369	3.90919	0.802375	65.9199
bcdTOM/bcdTOM	20	31	23.012	3.67832	0.967333	32.2167
bcdTOM/bcdTOM	20	31	7.305	0.875494	0.6955	-47.4534
bcdTOM/bcdTOM	20	31	2.929	2.01779	0.8045	22.0651
bcdTOM/bcdTOM	20	31	8.107	1.08157	0.42725	-1.85444
bcdTOM/bcdTOM	20	31	8.534	1.46543	0.4596	-6.50426
bcdTOM/bcdTOM	20	31	8.961	0.833235	0.654	15.7376
bcdTOM/bcdTOM	20	31	33.132	0.796699	0.32575	-48.9697
bcdTOM/bcdTOM	20	31	7.339	1.67387	0.652667	-21.9985
bcdTOM/bcdTOM	20	31	16.318	2.47468	1.29933	-54.4731
bcdTOM/bcdTOM	20	31	12.535	0.939322	0.38425	-31.3717
bcdTOM/bcdTOM	20	31	16.684	0.989257	0.77	-37.4838
bcdTOM/bcdTOM	20	31	5.936	0.895126	0.3785	37.8301
bcdTOM/bcdTOM	20	31	15.899	1.25127	0.9785	-79.175
bcdTOM/bcdTOM	20	31	9.606	0.270224	0.237	15.0134
bcdTOM/bcdTOM	20	31	7.339	1.71694	1.3495	5.85006
bcdTOM/bcdTOM	20	31	8.385	0.531791	0.4155	66.858
bcdTOM/bcdTOM	20	31	8.381	0.644287	0.504	-84.2098
bcdTOM/bcdTOM	20	31	9.676	0.891294	0.383	59.378
bcdTOM/bcdTOM	20	31	7.061	0.492995	0.384	81.837
bcdTOM/bcdTOM	21	32	43.592	2.89091	0.836167	28.6484
bcdTOM/bcdTOM	21	32	43.331	0.607883	0.4935	25.4269
bcdTOM/bcdTOM	21	32	6.904	1.06255	0.358833	40.9932
bcdTOM/bcdTOM	21	32	10.512	1.93539	0.6212	44.6441
bcdTOM/bcdTOM	21	32	11.785	0.863005	0.459333	43.4036
bcdTOM/bcdTOM	21	32	9.798	0.604646	0.4755	-56.8093
bcdTOM/bcdTOM	21	32	3.225	0.685543	0.362667	82.7091
bcdTOM/bcdTOM	21	32	10.565	2.53884	0.455778	-74.0422
bcdTOM/bcdTOM	21	32	11.48	0.74722	0.588	36.4558
bcdTOM/bcdTOM	21	32	10.565	0.482236	0.379	-40.6271
bcdTOM/bcdTOM	21	32	11.584	0.846202	0.668	-81.0943
bcdTOM/bcdTOM	21	32	11.175	0.249479	0.2005	-77.9694
bcdTOM/bcdTOM	21	32	6.851	0.4254	0.210143	-79.2976
bcdTOM/bcdTOM	21	32	27.693	1.15832	0.613	-83.556
bcdTOM/bcdTOM	21	32	29.994	1.177	0.644667	90
bcdTOM/bcdTOM	21	32	15.69	0.667344	1.048	-25.5667
bcdTOM/bcdTOM	21	32	10.382	2.84347	0.562875	57.7575
bcdTOM/bcdTOM	21	32	8.159	2.43957	0.3956	-30.9597
bcdTOM/bcdTOM	21	32	5.125	1.06687	0.571	11.3521
bcdTOM/bcdTOM	21	32	13.441	1.05479	0.346333	66.5946
bcdTOM/bcdTOM	21	32	13.101	0.762106	0.425667	5.94998
bcdTOM/bcdTOM	21	32	14.173	1.47247	0.58925	-56.5797
bcdTOM/bcdTOM	21	32	14.121	1.05836	0.560333	-50.0211
bcdTOM/bcdTOM	21	32	10.844	2.49531	0.7932	31.1291
bcdTOM/bcdTOM	21	32	7.514	1.30621	0.283	-13.1426
bcdTOM/bcdTOM	21	32	5.352	1.94097	0.6214	63.897
bcdTOM/bcdTOM	21	32	6.137	1.03735	0.55	7.70049
bcdTOM/bcdTOM	21	32	4.289	1.44609	0.763	31.1948
bcdTOM/bcdTOM	21	32	3.208	0.767042	0.603	0.597588
bcdTOM/bcdTOM	21	32	9.885	1.2044	0.488	62.8818
bcdTOM/bcdTOM	21	32	14.291	0.77836	0.331	-49.0634
bcdTOM/bcdTOM	21	32	16.37	0.943434	0.42675	-3.15962
bcdTOM/bcdTOM	21	32	8.839	2.20254	0.868	23.2942
bcdTOM/bcdTOM	21	32	12.953	1.17208	0.9285	-22.7364
bcdTOM/bcdTOM	21	32	12.578	1.30689	0.697	28.2711
bcdTOM/bcdTOM	21	32	18.985	0.686743	0.5525	-81.9643
bcdTOM/bcdTOM	21	32	10.756	0.553673	0.291333	-65.7958
bcdTOM/bcdTOM	21	32	6.877	0.247923	0.14	-71.4189
bcdTOM/bcdTOM	21	32	13.31	1.09987	0.302333	-18.0066
bcdTOM/bcdTOM	21	32	14.043	1.10363	0.4365	-58.6
bcdTOM/bcdTOM	21	32	13.232	0.704528	0.377	-58.7015
bcdTOM/bcdTOM	21	32	13.546	0.340231	0.296	-22.6458
bcdTOM/bcdTOM	21	32	47.053	1.00329	0.539667	20.2954
bcdTOM/bcdTOM	21	32	36.558	2.55094	1.0035	86.0888
bcdTOM/bcdTOM	21	32	32.234	0.956952	0.7555	-10.4762
bcdTOM/bcdTOM	21	32	46.111	1.99285	1.06167	86.0004
bcdTOM/bcdTOM	21	32	14.278	0.65445	0.5375	-25.2337
bcdTOM/bcdTOM	21	32	6.938	0.858617	0.6755	-29.1324
bcdTOM/bcdTOM	21	33	17.233	2.17285	1.14833	11.7909
bcdTOM/bcdTOM	21	33	3.853	1.094	0.4525	22.4627
bcdTOM/bcdTOM	21	33	7.688	1.14425	0.3846	10.5243
bcdTOM/bcdTOM	21	33	4.341	2.48845	0.564571	3.01763
bcdTOM/bcdTOM	21	33	6.668	0.902358	0.2745	60.452
bcdTOM/bcdTOM	21	33	5.492	1.70059	0.4472	44.9762
bcdTOM/bcdTOM	21	33	7.2	1.87449	0.7505	46.5131
bcdTOM/bcdTOM	21	33	6.677	0.88821	0.4895	11.2973
bcdTOM/bcdTOM	21	33	4.794	0.890785	0.703	30.5666
bcdTOM/bcdTOM	21	33	26.342	1.5091	0.793667	-49.7034
bcdTOM/bcdTOM	21	33	25.121	1.98676	1.06467	-68.3807
bcdTOM/bcdTOM	21	33	38.964	1.12568	0.603667	-16.1971
bcdTOM/bcdTOM	21	33	38.58	0.672804	0.53	-21.2637
bcdTOM/bcdTOM	21	33	6.119	0.628733	0.26525	-46.0955
bcdTOM/bcdTOM	21	33	6.668	1.30162	0.5305	-67.5528
bcdTOM/bcdTOM	21	33	3.164	0.502255	0.273	51.3046
bcdTOM/bcdTOM	21	33	2.955	0.814004	0.64	42.411
bcdTOM/bcdTOM	21	33	6.503	0.52417	0.439	-86.1714
bcdTOM/bcdTOM	21	33	19.403	0.733835	0.5765	2.73374
bcdTOM/bcdTOM	21	33	40.498	1.12268	0.8825	-36.1962
bcdTOM/bcdTOM	22	34	21.234	1.43592	1.1175	-56.9075
bcdTOM/bcdTOM	22	34	13.912	0.743281	0.6015	-39.3219
bcdTOM/bcdTOM	22	34	13.912	1.95428	0.7615	15.5225
bcdTOM/bcdTOM	22	34	8.316	1.13159	0.3728	33.6479
bcdTOM/bcdTOM	22	34	8.996	0.666095	0.274	-45
bcdTOM/bcdTOM	22	34	12.5	1.26577	1.0105	-60.2551
bcdTOM/bcdTOM	22	34	13.337	0.681602	0.354667	57.5224
bcdTOM/bcdTOM	22	34	14.069	0.777273	0.31075	-42.2886
bcdTOM/bcdTOM	22	34	14.226	1.81571	0.952	-41.4947
bcdTOM/bcdTOM	22	34	8.734	3.35136	1.0674	-22.9539
bcdTOM/bcdTOM	22	34	8.368	1.82169	1.426	50.8146
bcdTOM/bcdTOM	22	34	4.864	1.07657	0.3522	60.9351
bcdTOM/bcdTOM	22	34	10.617	1.23876	0.9635	9.71325
bcdTOM/bcdTOM	22	34	6.747	1.06266	0.42125	-66.8368
bcdTOM/bcdTOM	22	34	4.132	0.3478	0.2725	36.9358
bcdTOM/bcdTOM	22	34	5.805	4.28048	0.84425	-23.007
bcdTOM/bcdTOM	22	34	6.956	3.50751	1.1445	-37.3306
bcdTOM/bcdTOM	22	34	8.172	0.735054	0.5825	11.6157
bcdTOM/bcdTOM	22	34	8.368	0.633103	0.246	-18.0343
bcdTOM/bcdTOM	22	34	10.094	1.42189	0.3595	-32.2147
bcdTOM/bcdTOM	22	34	8.246	0.786489	0.414667	-12.7817
bcdTOM/bcdTOM	22	34	3.957	0.463406	0.363	19.8035

## Sheet: Figure S2Ai
Distance from anterior / Direction	Total particles	0-5um particles	5-10um particles	>10um particles
-90:-75 degrees	#REF!	#REF!	#REF!	#REF!		-90	-75
-75:-60 degrees	#REF!	#REF!	#REF!	#REF!		-75	-60
-60:-45 degrees	#REF!	#REF!	#REF!	#REF!		-60	-45
-45:-30 degrees	#REF!	#REF!	#REF!	#REF!		-45	-30
-30:-15 degrees	#REF!	#REF!	#REF!	#REF!		-30	-15
-15:0 degrees	#REF!	#REF!	#REF!	#REF!		-15	0
0:15 degrees	#REF!	#REF!	#REF!	#REF!		0	15
15:30 degrees	#REF!	#REF!	#REF!	#REF!		15	30
30:45 degrees	#REF!	#REF!	#REF!	#REF!		30	45
45:60 degrees	#REF!	#REF!	#REF!	#REF!		45	60
60:75 degrees	#REF!	#REF!	#REF!	#REF!		60	75
75:90 degrees	#REF!	#REF!	#REF!	#REF!		75	90
			5	10
		5	10
Distance from anterior / Direction	Frequency Total	Frequency 0-5um	Frequency 5-10um	Frequency >10um
-90:-75 degrees	#REF!	#REF!	#REF!	#REF!
-75:-60 degrees	#REF!	#REF!	#REF!	#REF!
-60:-45 degrees	#REF!	#REF!	#REF!	#REF!
-45:-30 degrees	#REF!	#REF!	#REF!	#REF!
-30:-15 degrees	#REF!	#REF!	#REF!	#REF!
-15:0 degrees	#REF!	#REF!	#REF!	#REF!
0:15 degrees	#REF!	#REF!	#REF!	#REF!
15:30 degrees	#REF!	#REF!	#REF!	#REF!
30:45 degrees	#REF!	#REF!	#REF!	#REF!
45:60 degrees	#REF!	#REF!	#REF!	#REF!
60:75 degrees	#REF!	#REF!	#REF!	#REF!
75:90 degrees	#REF!	#REF!	#REF!	#REF!

## Sheet: Figure S2Aii
Distance from anterior / Direction	Total particles	0-5um particles	5-10um particles	>10um particles
Anterior	#REF!	#REF!	#REF!	#REF!
Posterior	#REF!	#REF!	#REF!	#REF!
Anterior (-90:-30 degrees)	#REF!	#REF!	#REF!	#REF!
Posterior (+90:+30 degrees)	#REF!	#REF!	#REF!	#REF!
Anterior (-30:+30 degrees)	#REF!	#REF!	#REF!	#REF!
		#REF!	#REF!	#REF!
Distance from anterior / Direction	Total %	0-5um %	5-10um %	>10um %
Anterior	#REF!	#REF!	#REF!	#REF!
Posterior	#REF!	#REF!	#REF!	#REF!
Anterior (-90:-30 degrees)	#REF!	#REF!	#REF!	#REF!
Posterior (+90:+30 degrees)	#REF!	#REF!	#REF!	#REF!
Anterior (-30:+30 degrees)	#REF!	#REF!	#REF!	#REF!
