# Supplementary material for: bicoid mRNA localises to the Drosophila oocyte anterior by random Dynein-mediated transport and anchoring
Source: eLife. 2016 Oct 28;5:e17537. doi: 10.7554/eLife.17537 (PMC5125753; doi:10.7554/eLife.17537)
Supplement: Figure 3—source data 1. — Includes the data in: Figure 3—figure supplement 1, panel D. DOI: http://dx.doi.org/10.7554/eLife.17537.015 [file elife-17537-fig3-data1.xlsx]

## Sheet: Sheet1
Time (min)	bcd*Dendra2 - st9					grk*Dendra2 - st8/9
10	1	1	1	1	1	1	1	1	1	1	1	1
60	0.609681	0.576656	0.310787	0.739319	0.489619	0.509815	0.527446	0.675485	0.749618	0.403762	0.508076	0.651084
