# Supplementary material for: bicoid mRNA localises to the Drosophila oocyte anterior by random Dynein-mediated transport and anchoring
Source: eLife. 2016 Oct 28;5:e17537. doi: 10.7554/eLife.17537 (PMC5125753; doi:10.7554/eLife.17537)
Supplement: Figure 4—source data 1. — Includes the data in: Figure 4, panel G. DOI: http://dx.doi.org/10.7554/eLife.17537.025 [file elife-17537-fig4-data1.xlsx]

## Sheet: Sheet1
X-Shift (um)	Anterior											Anterior Random tile max											Away from Anterior											Away from Anterior - Random tile max
-3.48	0.02	0.04	0	0.01	0.07	0.02	0.01	0.06	0.034	0.067	-0.014	0.03	0.03	0.04	0.05	0.05	0.05	0.02	0.101	0.022	0.082	0.093	0	0.06	0.05	0.06	0.01	0.01	0.04	0.016	0.023	0.089	0.143	0.04	0.02	0.03	0.03	0.03	0.02	0.04	0.02	0.022	0.07	0.06
-3.306	0.02	0.04	-0.01	0.01	0.07	0.01	0.01	0.069	0.035	0.09	-0.012	0.03	0.03	0.04	0.05	0.05	0.05	0.02	0.101	0.022	0.082	0.093	0.02	0.06	0.05	0.07	0.01	0.01	0.04	0.004	0.026	0.095	0.155	0.04	0.02	0.03	0.03	0.03	0.02	0.04	0.02	0.022	0.07	0.06
-3.132	0.01	0.04	-0.01	0	0.07	0	0.02	0.076	0.034	0.109	-0.01	0.03	0.03	0.04	0.05	0.05	0.05	0.02	0.101	0.022	0.082	0.093	0.02	0.06	0.05	0.07	0	0.01	0.04	-0.006	0.024	0.1	0.16	0.04	0.02	0.03	0.03	0.03	0.02	0.04	0.02	0.022	0.07	0.06
-2.958	0.03	0.04	-0.01	0.000149	0.07	0	0.03	0.08	0.031	0.116	-0.003	0.03	0.03	0.04	0.05	0.05	0.05	0.02	0.101	0.022	0.082	0.093	0.02	0.06	0.05	0.06	0.01	0.02	0.04	-0.012	0.019	0.096	0.158	0.04	0.02	0.03	0.03	0.03	0.02	0.04	0.02	0.022	0.07	0.06
-2.784	0.03	0.03	-0.01	0	0.06	-0.01	0.03	0.078	0.033	0.116	-0.003	0.03	0.03	0.04	0.05	0.05	0.05	0.02	0.101	0.022	0.082	0.093	0.02	0.06	0.04	0.06	0.01	0.03	0.04	-0.018	0.023	0.098	0.171	0.04	0.02	0.03	0.03	0.03	0.02	0.04	0.02	0.022	0.07	0.06
-2.61	0.03	0.03	-0.01	0.01	0.06	-0.01	0.03	0.073	0.025	0.111	-0.001	0.03	0.03	0.04	0.05	0.05	0.05	0.02	0.101	0.022	0.082	0.093	0.02	0.06	0.04	0.06	0.01	0.04	0.04	-0.022	0.016	0.094	0.184	0.04	0.02	0.03	0.03	0.03	0.02	0.04	0.02	0.022	0.07	0.06
-2.436	0.04	0.02	0	0.01	0.07	-0.01	0.02	0.075	0.031	0.11	0.009	0.03	0.03	0.04	0.05	0.05	0.05	0.02	0.101	0.022	0.082	0.093	0.02	0.05	0.05	0.08	0.01	0.05	0.03	-0.02	0.027	0.09	0.183	0.04	0.02	0.03	0.03	0.03	0.02	0.04	0.02	0.022	0.07	0.06
-2.262	0.04	0.01	0	0.02	0.07	-0.02	0.01	0.083	0.031	0.108	0.027	0.03	0.03	0.04	0.05	0.05	0.05	0.02	0.101	0.022	0.082	0.093	0.02	0.05	0.04	0.08	0.01	0.05	0.03	-0.015	0.027	0.085	0.176	0.04	0.02	0.03	0.03	0.03	0.02	0.04	0.02	0.022	0.07	0.06
-2.088	0.03	0.01	0.01	0.04	0.07	-0.02	0.01	0.094	0.027	0.105	0.051	0.03	0.03	0.04	0.05	0.05	0.05	0.02	0.101	0.022	0.082	0.093	0.02	0.05	0.04	0.08	-0.000594	0.03	0.02	-0.011	0.014	0.085	0.161	0.04	0.02	0.03	0.03	0.03	0.02	0.04	0.02	0.022	0.07	0.06
-1.914	0.02	0	0.02	0.05	0.08	-0.02	0.01	0.104	0.029	0.101	0.063	0.03	0.03	0.04	0.05	0.05	0.05	0.02	0.101	0.022	0.082	0.093	0.03	0.05	0.04	0.08	0	0.03	0.01	-0.01	0.016	0.081	0.134	0.04	0.02	0.03	0.03	0.03	0.02	0.04	0.02	0.022	0.07	0.06
-1.74	0.02	0.01	0.03	0.07	0.09	-0.02	0.02	0.113	0.032	0.095	0.056	0.03	0.03	0.04	0.05	0.05	0.05	0.02	0.101	0.022	0.082	0.093	0.03	0.05	0.05	0.07	-0.01	0.02	0.01	-0.008	0.019	0.081	0.106	0.04	0.02	0.03	0.03	0.03	0.02	0.04	0.02	0.022	0.07	0.06
-1.566	0.02	0.02	0.04	0.08	0.1	-0.02	0.03	0.118	0.037	0.08	0.046	0.03	0.03	0.04	0.05	0.05	0.05	0.02	0.101	0.022	0.082	0.093	0.04	0.05	0.05	0.07	-0.02	0.02	0.02	-0.012	0.02	0.09	0.099	0.04	0.02	0.03	0.03	0.03	0.02	0.04	0.02	0.022	0.07	0.06
-1.392	0.02	0.02	0.05	0.09	0.11	-0.02	0.03	0.124	0.048	0.068	0.038	0.03	0.03	0.04	0.05	0.05	0.05	0.02	0.101	0.022	0.082	0.093	0.04	0.05	0.04	0.06	-0.03	0.02	0.03	-0.018	0.014	0.094	0.098	0.04	0.02	0.03	0.03	0.03	0.02	0.04	0.02	0.022	0.07	0.06
-1.218	0.02	0.03	0.05	0.1	0.1	-0.01	0.04	0.134	0.046	0.061	0.033	0.03	0.03	0.04	0.05	0.05	0.05	0.02	0.101	0.022	0.082	0.093	0.04	0.06	0.04	0.05	-0.03	0.02	0.04	-0.025	0.026	0.103	0.088	0.04	0.02	0.03	0.03	0.03	0.02	0.04	0.02	0.022	0.07	0.06
-1.044	0.03	0.05	0.05	0.09	0.09	0	0.05	0.146	0.049	0.058	0.029	0.03	0.03	0.04	0.05	0.05	0.05	0.02	0.101	0.022	0.082	0.093	0.06	0.06	0.05	0.04	-0.03	0.01	0.07	-0.03	0.026	0.111	0.079	0.04	0.02	0.03	0.03	0.03	0.02	0.04	0.02	0.022	0.07	0.06
-0.87	0.04	0.08	0.06	0.09	0.07	0.01	0.06	0.165	0.053	0.068	0.025	0.03	0.03	0.04	0.05	0.05	0.05	0.02	0.101	0.022	0.082	0.093	0.07	0.08	0.05	0.03	-0.03	0.01	0.1	-0.032	0.019	0.14	0.08	0.04	0.02	0.03	0.03	0.03	0.02	0.04	0.02	0.022	0.07	0.06
-0.696	0.07	0.12	0.07	0.1	0.05	0.03	0.07	0.187	0.054	0.094	0.026	0.03	0.03	0.04	0.05	0.05	0.05	0.02	0.101	0.022	0.082	0.093	0.08	0.08	0.05	0.02	-0.04	0.02	0.12	-0.028	0.025	0.182	0.099	0.04	0.02	0.03	0.03	0.03	0.02	0.04	0.02	0.022	0.07	0.06
-0.522	0.1	0.17	0.1	0.12	0.06	0.07	0.07	0.209	0.06	0.13	0.031	0.03	0.03	0.04	0.05	0.05	0.05	0.02	0.101	0.022	0.082	0.093	0.1	0.09	0.05	0.02	-0.03	0.01	0.16	-0.016	0.027	0.24	0.114	0.04	0.02	0.03	0.03	0.03	0.02	0.04	0.02	0.022	0.07	0.06
-0.348	0.13	0.22	0.14	0.14	0.07	0.09	0.06	0.233	0.067	0.163	0.038	0.03	0.03	0.04	0.05	0.05	0.05	0.02	0.101	0.022	0.082	0.093	0.11	0.1	0.05	0.02	-0.03	0.01	0.18	-0.002	0.035	0.299	0.116	0.04	0.02	0.03	0.03	0.03	0.02	0.04	0.02	0.022	0.07	0.06
-0.174	0.16	0.27	0.19	0.15	0.09	0.11	0.06	0.252	0.058	0.193	0.045	0.03	0.03	0.04	0.05	0.05	0.05	0.02	0.101	0.022	0.082	0.093	0.11	0.09	0.05	0.01	-0.04	0	0.2	0.013	0.033	0.331	0.118	0.04	0.02	0.03	0.03	0.03	0.02	0.04	0.02	0.022	0.07	0.06
0	0.18	0.29	0.21	0.14	0.09	0.11	0.06	0.258	0.05	0.2	0.046	0.03	0.03	0.04	0.05	0.05	0.05	0.02	0.101	0.022	0.082	0.093	0.1	0.09	0.06	0.01	-0.05	-0.01	0.21	0.021	0.045	0.311	0.105	0.04	0.02	0.03	0.03	0.03	0.02	0.04	0.02	0.022	0.07	0.06
0.174	0.18	0.28	0.21	0.12	0.07	0.08	0.02	0.251	0.039	0.188	0.046	0.03	0.03	0.04	0.05	0.05	0.05	0.02	0.101	0.022	0.082	0.093	0.08	0.08	0.06	0	-0.06	-0.01	0.2	0.018	0.036	0.249	0.083	0.04	0.02	0.03	0.03	0.03	0.02	0.04	0.02	0.022	0.07	0.06
0.348	0.17	0.25	0.18	0.11	0.06	0.05	0.01	0.231	0.032	0.156	0.038	0.03	0.03	0.04	0.05	0.05	0.05	0.02	0.101	0.022	0.082	0.093	0.06	0.06	0.05	0	-0.05	-0.01	0.19	0.012	0.033	0.183	0.067	0.04	0.02	0.03	0.03	0.03	0.02	0.04	0.02	0.022	0.07	0.06
0.522	0.14	0.21	0.14	0.09	0.04	0.02	0.01	0.203	0.026	0.122	0.035	0.03	0.03	0.04	0.05	0.05	0.05	0.02	0.101	0.022	0.082	0.093	0.05	0.06	0.03	0	-0.04	-0.01	0.17	-0.000523	0.006	0.126	0.07	0.04	0.02	0.03	0.03	0.03	0.02	0.04	0.02	0.022	0.07	0.06
0.696	0.11	0.17	0.1	0.08	0.02	0	0.01	0.171	0.029	0.097	0.036	0.03	0.03	0.04	0.05	0.05	0.05	0.02	0.101	0.022	0.082	0.093	0.05	0.05	0.02	0	-0.02	-0.01	0.15	-0.013	0.002	0.09	0.069	0.04	0.02	0.03	0.03	0.03	0.02	0.04	0.02	0.022	0.07	0.06
0.87	0.09	0.13	0.08	0.07	0.01	0	0	0.141	0.022	0.082	0.053	0.03	0.03	0.04	0.05	0.05	0.05	0.02	0.101	0.022	0.082	0.093	0.04	0.05	0.01	0	0	-0.01	0.13	-0.024	-0.004	0.085	0.058	0.04	0.02	0.03	0.03	0.03	0.02	0.04	0.02	0.022	0.07	0.06
1.044	0.07	0.1	0.06	0.07	0.02	0	-0.01	0.116	0.023	0.073	0.082	0.03	0.03	0.04	0.05	0.05	0.05	0.02	0.101	0.022	0.082	0.093	0.03	0.04	0.01	0	0.01	0.000636	0.11	-0.03	-0.008	0.072	0.04	0.04	0.02	0.03	0.03	0.03	0.02	0.04	0.02	0.022	0.07	0.06
1.218	0.06	0.07	0.06	0.06	0.01	0	-0.02	0.098	0.025	0.075	0.115	0.03	0.03	0.04	0.05	0.05	0.05	0.02	0.101	0.022	0.082	0.093	0.02	0.03	0.01	0.01	0.02	0.000509	0.09	-0.033	-0.008	0.055	0.017	0.04	0.02	0.03	0.03	0.03	0.02	0.04	0.02	0.022	0.07	0.06
1.392	0.05	0.06	0.06	0.06	0.02	0.01	-0.02	0.085	0.03	0.078	0.148	0.03	0.03	0.04	0.05	0.05	0.05	0.02	0.101	0.022	0.082	0.093	0.01	0.02	0.01	0.03	0.04	0.01	0.07	-0.034	-0.003	0.045	0.007	0.04	0.02	0.03	0.03	0.03	0.02	0.04	0.02	0.022	0.07	0.06
1.566	0.04	0.04	0.07	0.05	0.02	0.01	-0.02	0.074	0.036	0.086	0.169	0.03	0.03	0.04	0.05	0.05	0.05	0.02	0.101	0.022	0.082	0.093	9.178e-05	0.02	0.01	0.03	0.04	0.01	0.05	-0.029	-0.004	0.024	0.006	0.04	0.02	0.03	0.03	0.03	0.02	0.04	0.02	0.022	0.07	0.06
1.74	0.03	0.03	0.07	0.04	0.02	0.02	-0.02	0.067	0.029	0.092	0.175	0.03	0.03	0.04	0.05	0.05	0.05	0.02	0.101	0.022	0.082	0.093	0	0.02	0.01	0.05	0.04	0.01	0.03	-0.021	-0.009	0.008	0.011	0.04	0.02	0.03	0.03	0.03	0.02	0.04	0.02	0.022	0.07	0.06
1.914	0.02	0.03	0.07	0.03	0.02	0.02	-0.02	0.063	0.033	0.092	0.17	0.03	0.03	0.04	0.05	0.05	0.05	0.02	0.101	0.022	0.082	0.093	-0.01	0.01	0.01	0.05	0.04	0.01	0.02	-0.014	-0.009	0.004	0.015	0.04	0.02	0.03	0.03	0.03	0.02	0.04	0.02	0.022	0.07	0.06
2.088	0.03	0.03	0.07	0.03	0.02	0.02	-0.02	0.06	0.028	0.093	0.159	0.03	0.03	0.04	0.05	0.05	0.05	0.02	0.101	0.022	0.082	0.093	-0.01	0.02	0.01	0.05	0.02	0.01	0.02	-0.01	-0.006	0.006	0.019	0.04	0.02	0.03	0.03	0.03	0.02	0.04	0.02	0.022	0.07	0.06
2.262	0.02	0.03	0.06	0.03	0.01	0.02	-0.02	0.058	0.021	0.096	0.137	0.03	0.03	0.04	0.05	0.05	0.05	0.02	0.101	0.022	0.082	0.093	-0.01	0.02	0.02	0.06	0.01	0.01	0.01	-0.005	-0.007	0.03	0.028	0.04	0.02	0.03	0.03	0.03	0.02	0.04	0.02	0.022	0.07	0.06
2.436	0.02	0.03	0.06	0.03	0.000822	0.01	-0.01	0.054	0.015	0.099	0.113	0.03	0.03	0.04	0.05	0.05	0.05	0.02	0.101	0.022	0.082	0.093	-0.01	0.02	0.02	0.06	0	-0.01	0.01	-0.001	-0.01	0.046	0.033	0.04	0.02	0.03	0.03	0.03	0.02	0.04	0.02	0.022	0.07	0.06
2.61	0.02	0.04	0.05	0.02	0	0.01	-0.01	0.05	0.01	0.1	0.098	0.03	0.03	0.04	0.05	0.05	0.05	0.02	0.101	0.022	0.082	0.093	0	0.01	0.01	0.05	0	-0.03	0.02	0.001	-0.023	0.055	0.032	0.04	0.02	0.03	0.03	0.03	0.02	0.04	0.02	0.022	0.07	0.06
2.784	0.02	0.05	0.05	0.02	0	0.02	-0.01	0.047	0.002	0.093	0.087	0.03	0.03	0.04	0.05	0.05	0.05	0.02	0.101	0.022	0.082	0.093	0	0.02	0	0.04	-0.01	-0.04	0.02	0.004	-0.009	0.04	0.018	0.04	0.02	0.03	0.03	0.03	0.02	0.04	0.02	0.022	0.07	0.06
2.958	0.02	0.06	0.06	0.02	-0.01	0.02	-0.01	0.045	0.006	0.075	0.077	0.03	0.03	0.04	0.05	0.05	0.05	0.02	0.101	0.022	0.082	0.093	0.01	0.01	-0.01	0.03	0	-0.05	0.02	0.007	-0.015	0.027	0.012	0.04	0.02	0.03	0.03	0.03	0.02	0.04	0.02	0.022	0.07	0.06
3.132	0.02	0.06	0.06	0.02	-0.01	0.03	-0.01	0.041	0.002	0.054	0.08	0.03	0.03	0.04	0.05	0.05	0.05	0.02	0.101	0.022	0.082	0.093	0.0002166	0.01	-0.01	0.02	0	-0.06	0.01	0.012	-0.018	0.004	0.012	0.04	0.02	0.03	0.03	0.03	0.02	0.04	0.02	0.022	0.07	0.06
3.306	0.02	0.06	0.06	0.02	-0.02	0.04	-0.01	0.036	0.005	0.038	0.08	0.03	0.03	0.04	0.05	0.05	0.05	0.02	0.101	0.022	0.082	0.093	0.01	0.01	0	0.01	0	-0.06	0.01	0.015	-0.022	0.003	0.008	0.04	0.02	0.03	0.03	0.03	0.02	0.04	0.02	0.022	0.07	0.06
3.48	0.02	0.06	0.05	0.02	-0.03	0.03	-0.01	0.03	0.005	0.026	0.082	0.03	0.03	0.04	0.05	0.05	0.05	0.02	0.101	0.022	0.082	0.093	0	0.01	0	0	0.02	-0.05	0.01	0.019	-0.029	0.004	0.004	0.04	0.02	0.03	0.03	0.03	0.02	0.04	0.02	0.022	0.07	0.06
