# Supplementary material for: bicoid mRNA localises to the Drosophila oocyte anterior by random Dynein-mediated transport and anchoring
Source: eLife. 2016 Oct 28;5:e17537. doi: 10.7554/eLife.17537 (PMC5125753; doi:10.7554/eLife.17537)
Supplement: Figure 4—source data 2. — Includes the data in: Figure 4—figure supplement 1, panel B. DOI: http://dx.doi.org/10.7554/eLife.17537.026 [file elife-17537-fig4-data2.xlsx]

## Sheet: Sheet1
X-Shift (um)	Anterior									Anterior - Random max									Away									Away - Random max
-1.59	0.06	-0.05	-0.02	-0.01	0	0.03	0.03	0.03	0.07	0.01	0.01	0.01	0.01	0.01	0.01	0.01	0.01	0.01	0.01	0.02	0.01	0.04	0.03	0	0.01	0.0006229	0.03	0	0.01	0	0	0	0	0.01	0	0.01
-1.5105	0.06	-0.05	-0.02	-0.01	0.01	0.04	0.03	0.03	0.08	0.01	0.01	0.01	0.01	0.01	0.01	0.01	0.01	0.01	0.01	0.03	0.01	0.03	0.03	-0.0007418	0.01	0	0.03	0	0.01	0	0	0	0	0.01	0	0.01
-1.431	0.06	-0.05	-0.02	-0.01	0.02	0.04	0.03	0.03	0.08	0.01	0.01	0.01	0.01	0.01	0.01	0.01	0.01	0.01	0.01	0.04	0.01	0.03	0.03	0	0.01	0	0.04	0	0.01	0	0	0	0	0.01	0	0.01
-1.3515	0.06	-0.05	-0.02	-0.01	0.03	0.03	0.03	0.03	0.08	0.01	0.01	0.01	0.01	0.01	0.01	0.01	0.01	0.01	0.01	0.04	0.01	0.03	0.03	0	0.01	0	0.04	0	0.01	0	0	0	0	0.01	0	0.01
-1.272	0.06	-0.05	-0.01	-0.01	0.04	0.03	0.04	0.03	0.08	0.01	0.01	0.01	0.01	0.01	0.01	0.01	0.01	0.01	0.01	0.04	0.01	0.03	0.03	-0.0003345	0.01	0	0.03	0	0.01	0	0	0	0	0.01	0	0.01
-1.1925	0.06	-0.05	-0.01	-0.01	0.05	0.03	0.04	0.02	0.08	0.01	0.01	0.01	0.01	0.01	0.01	0.01	0.01	0.01	0.01	0.04	0.01	0.03	0.03	0.0009079	0.01	0.01	0.03	0	0.01	0	0	0	0	0.01	0	0.01
-1.113	0.06	-0.05	-0.01	-0.01	0.06	0.03	0.04	0.02	0.09	0.01	0.01	0.01	0.01	0.01	0.01	0.01	0.01	0.01	0.01	0.04	0.01	0.03	0.03	0.0008741	0.01	0.01	0.03	0	0.01	0	0	0	0	0.01	0	0.01
-1.0335	0.06	-0.05	0	-0.01	0.07	0.03	0.04	0.02	0.09	0.01	0.01	0.01	0.01	0.01	0.01	0.01	0.01	0.01	0.01	0.04	0.01	0.03	0.03	0.0009998	0.01	0	0.02	0	0.01	0	0	0	0	0.01	0	0.01
-0.954	0.06	-0.04	0	-0.01	0.08	0.03	0.04	0.02	0.09	0.01	0.01	0.01	0.01	0.01	0.01	0.01	0.01	0.01	0.01	0.04	0.01	0.03	0.03	0	0.02	0	0.02	0	0.01	0	0	0	0	0.01	0	0.01
-0.8745	0.06	-0.03	0.01	-0.01	0.09	0.03	0.04	0.02	0.09	0.01	0.01	0.01	0.01	0.01	0.01	0.01	0.01	0.01	0.01	0.04	0.01	0.03	0.03	0	0.02	0	0.01	0	0.01	0	0	0	0	0.01	0	0.01
-0.795	0.06	-0.02	0.02	-0.01	0.11	0.03	0.04	0.02	0.09	0.01	0.01	0.01	0.01	0.01	0.01	0.01	0.01	0.01	0.01	0.03	0.01	0.03	0.03	0.01	0.02	0	0.01	0	0.01	0	0	0	0	0.01	0	0.01
-0.7155	0.06	-0.01	0.04	-0.000265	0.12	0.03	0.04	0.03	0.08	0.01	0.01	0.01	0.01	0.01	0.01	0.01	0.01	0.01	0.01	0.03	0.01	0.03	0.04	0.01	0.02	0	0.01	0	0.01	0	0	0	0	0.01	0	0.01
-0.636	0.06	0.01	0.05	0.01	0.13	0.03	0.04	0.04	0.08	0.01	0.01	0.01	0.01	0.01	0.01	0.01	0.01	0.01	0.01	0.04	0.02	0.03	0.04	0.01	0.02	0	0.01	0	0.01	0	0	0	0	0.01	0	0.01
-0.5565	0.06	0.03	0.06	0.02	0.15	0.04	0.05	0.05	0.07	0.01	0.01	0.01	0.01	0.01	0.01	0.01	0.01	0.01	0.02	0.04	0.02	0.03	0.04	0.02	0.02	0	0.01	0	0.01	0	0	0	0	0.01	0	0.01
-0.477	0.06	0.04	0.08	0.03	0.16	0.06	0.05	0.06	0.07	0.01	0.01	0.01	0.01	0.01	0.01	0.01	0.01	0.01	0.02	0.04	0.02	0.03	0.04	0.02	0.03	0.01	0.01	0	0.01	0	0	0	0	0.01	0	0.01
-0.3975	0.06	0.06	0.09	0.05	0.16	0.07	0.06	0.08	0.08	0.01	0.01	0.01	0.01	0.01	0.01	0.01	0.01	0.01	0.02	0.04	0.02	0.03	0.04	0.03	0.03	0.01	0	0	0.01	0	0	0	0	0.01	0	0.01
-0.318	0.06	0.07	0.09	0.06	0.16	0.09	0.07	0.1	0.08	0.01	0.01	0.01	0.01	0.01	0.01	0.01	0.01	0.01	0.02	0.04	0.02	0.03	0.05	0.04	0.03	0.01	0.01	0	0.01	0	0	0	0	0.01	0	0.01
-0.2385	0.06	0.08	0.09	0.07	0.16	0.11	0.07	0.12	0.07	0.01	0.01	0.01	0.01	0.01	0.01	0.01	0.01	0.01	0.01	0.04	0.03	0.03	0.06	0.04	0.03	0.0009678	0.02	0	0.01	0	0	0	0	0.01	0	0.01
-0.159	0.06	0.09	0.09	0.07	0.14	0.13	0.07	0.15	0.06	0.01	0.01	0.01	0.01	0.01	0.01	0.01	0.01	0.01	0.01	0.04	0.03	0.04	0.06	0.05	0.03	-0.01	0.02	0	0.01	0	0	0	0	0.01	0	0.01
-0.0795	0.05	0.1	0.08	0.08	0.13	0.14	0.08	0.17	0.05	0.01	0.01	0.01	0.01	0.01	0.01	0.01	0.01	0.01	0.01	0.05	0.03	0.05	0.07	0.05	0.02	-0.01	0.03	0	0.01	0	0	0	0	0.01	0	0.01
0	0.05	0.1	0.08	0.08	0.11	0.13	0.08	0.18	0.04	0.01	0.01	0.01	0.01	0.01	0.01	0.01	0.01	0.01	0.01	0.05	0.03	0.05	0.08	0.05	0.02	-0.02	0.04	0	0.01	0	0	0	0	0.01	0	0.01
0.0795	0.05	0.1	0.07	0.08	0.1	0.12	0.08	0.18	0.03	0.01	0.01	0.01	0.01	0.01	0.01	0.01	0.01	0.01	0.01	0.05	0.03	0.06	0.08	0.05	0.02	-0.02	0.04	0	0.01	0	0	0	0	0.01	0	0.01
0.159	0.06	0.1	0.08	0.08	0.09	0.1	0.08	0.17	0.03	0.01	0.01	0.01	0.01	0.01	0.01	0.01	0.01	0.01	0.01	0.05	0.03	0.06	0.07	0.04	0.03	-0.01	0.03	0	0.01	0	0	0	0	0.01	0	0.01
0.2385	0.06	0.1	0.08	0.07	0.08	0.09	0.08	0.16	0.02	0.01	0.01	0.01	0.01	0.01	0.01	0.01	0.01	0.01	0.01	0.05	0.03	0.05	0.07	0.03	0.03	-0.01	0.03	0	0.01	0	0	0	0	0.01	0	0.01
0.318	0.06	0.09	0.08	0.07	0.07	0.07	0.08	0.13	0.02	0.01	0.01	0.01	0.01	0.01	0.01	0.01	0.01	0.01	0.01	0.04	0.02	0.05	0.06	0.03	0.03	0.0008346	0.02	0	0.01	0	0	0	0	0.01	0	0.01
0.3975	0.06	0.09	0.08	0.06	0.06	0.06	0.07	0.11	0.02	0.01	0.01	0.01	0.01	0.01	0.01	0.01	0.01	0.01	0.01	0.04	0.02	0.04	0.06	0.02	0.03	0.01	0.01	0	0.01	0	0	0	0	0.01	0	0.01
0.477	0.06	0.08	0.07	0.05	0.06	0.05	0.07	0.08	0.02	0.01	0.01	0.01	0.01	0.01	0.01	0.01	0.01	0.01	0	0.04	0.02	0.03	0.06	0.02	0.03	0.01	0.01	0	0.01	0	0	0	0	0.01	0	0.01
0.5565	0.06	0.08	0.07	0.05	0.06	0.04	0.06	0.05	0.02	0.01	0.01	0.01	0.01	0.01	0.01	0.01	0.01	0.01	-0.000474	0.05	0.02	0.03	0.05	0.01	0.02	0	0.01	0	0.01	0	0	0	0	0.01	0	0.01
0.636	0.06	0.08	0.06	0.05	0.06	0.04	0.06	0.03	0.02	0.01	0.01	0.01	0.01	0.01	0.01	0.01	0.01	0.01	-0.01	0.05	0.01	0.02	0.05	0.01	0.02	0	0.01	0	0.01	0	0	0	0	0.01	0	0.01
0.7155	0.06	0.09	0.06	0.05	0.06	0.04	0.06	0.01	0.02	0.01	0.01	0.01	0.01	0.01	0.01	0.01	0.01	0.01	-0.01	0.05	0.01	0.02	0.04	0.01	0.01	-0.0006494	0.01	0	0.01	0	0	0	0	0.01	0	0.01
0.795	0.06	0.09	0.06	0.05	0.06	0.04	0.06	0	0.01	0.01	0.01	0.01	0.01	0.01	0.01	0.01	0.01	0.01	-0.01	0.05	0.01	0.01	0.03	0.01	0.01	0	0.01	0	0.01	0	0	0	0	0.01	0	0.01
0.8745	0.06	0.1	0.05	0.05	0.07	0.04	0.06	-0.01	0.01	0.01	0.01	0.01	0.01	0.01	0.01	0.01	0.01	0.01	-0.01	0.05	0.01	0.01	0.03	0.01	0.01	0	0.01	0	0.01	0	0	0	0	0.01	0	0.01
0.954	0.06	0.1	0.05	0.05	0.07	0.05	0.06	-0.02	0.01	0.01	0.01	0.01	0.01	0.01	0.01	0.01	0.01	0.01	-0.01	0.05	0.01	0	0.02	0.01	0.01	0	0.01	0	0.01	0	0	0	0	0.01	0	0.01
1.0335	0.06	0.1	0.05	0.05	0.07	0.05	0.06	-0.02	0.01	0.01	0.01	0.01	0.01	0.01	0.01	0.01	0.01	0.01	-0.01	0.04	0.01	0	0.01	0.01	0.01	-0.01	0	0	0.01	0	0	0	0	0.01	0	0.01
1.113	0.06	0.11	0.04	0.05	0.07	0.05	0.06	-0.01	0.01	0.01	0.01	0.01	0.01	0.01	0.01	0.01	0.01	0.01	-0.01	0.04	0.01	0.000218	0.01	0.01	0.01	-0.01	0	0	0.01	0	0	0	0	0.01	0	0.01
1.1925	0.06	0.1	0.04	0.05	0.06	0.05	0.06	0	0.02	0.01	0.01	0.01	0.01	0.01	0.01	0.01	0.01	0.01	-0.01	0.03	0.01	-0.000506	0.01	0.01	0.01	-0.01	0	0	0.01	0	0	0	0	0.01	0	0.01
1.272	0.06	0.1	0.03	0.04	0.06	0.04	0.06	0	0.02	0.01	0.01	0.01	0.01	0.01	0.01	0.01	0.01	0.01	-0.01	0.03	0.01	0.000532	0	0.01	0.01	-0.01	0	0	0.01	0	0	0	0	0.01	0	0.01
1.3515	0.06	0.09	0.03	0.04	0.06	0.04	0.06	0.01	0.02	0.01	0.01	0.01	0.01	0.01	0.01	0.01	0.01	0.01	-0.01	0.03	0.01	0	-0.00069	0.01	0.01	-0.01	0	0	0.01	0	0	0	0	0.01	0	0.01
1.431	0.06	0.09	0.03	0.04	0.05	0.04	0.06	0.02	0.02	0.01	0.01	0.01	0.01	0.01	0.01	0.01	0.01	0.01	-0.01	0.02	0	0	0	0.01	0.01	-0.01	-0.000996	0	0.01	0	0	0	0	0.01	0	0.01
1.5105	0.06	0.08	0.02	0.04	0.05	0.04	0.06	0.02	0.02	0.01	0.01	0.01	0.01	0.01	0.01	0.01	0.01	0.01	-0.01	0.02	0	0.01	-0.01	0.01	0.01	-0.01	0	0	0.01	0	0	0	0	0.01	0	0.01
1.59	0.06	0.08	0.02	0.04	0.04	0.04	0.06	0.02	0.02	0.01	0.01	0.01	0.01	0.01	0.01	0.01	0.01	0.01	-0.01	0.02	0.000503	0.01	-0.01	0.01	0.01	-0.01	0.01	0	0.01	0	0	0	0	0.01	0	0.01
