# Supplementary material for: bicoid mRNA localises to the Drosophila oocyte anterior by random Dynein-mediated transport and anchoring
Source: eLife. 2016 Oct 28;5:e17537. doi: 10.7554/eLife.17537 (PMC5125753; doi:10.7554/eLife.17537)
Supplement: Figure 6—source data 1. — Includes the data in: Figure 6, panel B. DOI: http://dx.doi.org/10.7554/eLife.17537.031 [file elife-17537-fig6-data1.xlsx]

## Sheet: Sheet1
X-Shift (um)	Anterior								Anterior - Random max								Away								Away - Random max
-1.59	0.1	0.01	-0.07	-0.01	0	0.01	-0.000406	0.01	0.09	0.06	0.12	0.02	0.01	0.01	0	0.02	0.15	0.09	0.06	0.03	0.04	0.04	0.02	0.03	0.1	0.05	0.05	0.01	0.02	0.02	0.02	0.02
-1.5105	0.11	0.01	-0.07	-0.01	0	0.01	0.000153	0.01	0.09	0.06	0.12	0.02	0.01	0.01	0	0.02	0.15	0.09	0.06	0.03	0.04	0.04	0.01	0.04	0.1	0.05	0.05	0.01	0.02	0.02	0.02	0.02
-1.431	0.11	0.01	-0.07	-0.01	0	0.02	0.000215	0.01	0.09	0.06	0.12	0.02	0.01	0.01	0	0.02	0.15	0.09	0.05	0.03	0.04	0.03	0.01	0.04	0.1	0.05	0.05	0.01	0.02	0.02	0.02	0.02
-1.3515	0.12	0.02	-0.07	-0.01	0.000341	0.02	0.000184	0.01	0.09	0.06	0.12	0.02	0.01	0.01	0	0.02	0.14	0.09	0.05	0.03	0.03	0.03	0.01	0.04	0.1	0.05	0.05	0.01	0.02	0.02	0.02	0.02
-1.272	0.12	0.02	-0.07	0	0	0.02	0.000563	0.01	0.09	0.06	0.12	0.02	0.01	0.01	0	0.02	0.14	0.09	0.05	0.03	0.03	0.03	0.01	0.04	0.1	0.05	0.05	0.01	0.02	0.02	0.02	0.02
-1.1925	0.12	0.03	-0.06	0.000428	0	0.01	0	0.01	0.09	0.06	0.12	0.02	0.01	0.01	0	0.02	0.14	0.09	0.05	0.03	0.02	0.03	0.01	0.03	0.1	0.05	0.05	0.01	0.02	0.02	0.02	0.02
-1.113	0.12	0.03	-0.05	0	0	0.01	0	0.01	0.09	0.06	0.12	0.02	0.01	0.01	0	0.02	0.14	0.09	0.05	0.03	0.02	0.02	0.01	0.03	0.1	0.05	0.05	0.01	0.02	0.02	0.02	0.02
-1.0335	0.12	0.03	-0.04	0	0	0.01	0.01	0.01	0.09	0.06	0.12	0.02	0.01	0.01	0	0.02	0.14	0.1	0.05	0.02	0.01	0.02	0.01	0.03	0.1	0.05	0.05	0.01	0.02	0.02	0.02	0.02
-0.954	0.12	0.03	-0.03	0.01	0	0	0.01	0	0.09	0.06	0.12	0.02	0.01	0.01	0	0.02	0.13	0.1	0.05	0.02	0.01	0.02	0.01	0.03	0.1	0.05	0.05	0.01	0.02	0.02	0.02	0.02
-0.8745	0.13	0.03	-0.01	0.01	0.01	0	0.01	0	0.09	0.06	0.12	0.02	0.01	0.01	0	0.02	0.13	0.1	0.06	0.02	0.01	0.02	0.01	0.04	0.1	0.05	0.05	0.01	0.02	0.02	0.02	0.02
-0.795	0.13	0.03	-0.000608	0.01	0.01	0	0.01	0	0.09	0.06	0.12	0.02	0.01	0.01	0	0.02	0.13	0.11	0.06	0.02	0.01	0.02	0.01	0.04	0.1	0.05	0.05	0.01	0.02	0.02	0.02	0.02
-0.7155	0.14	0.03	0.01	0.02	0.02	-0.01	0.01	0.01	0.09	0.06	0.12	0.02	0.01	0.01	0	0.02	0.13	0.11	0.06	0.02	0.01	0.02	0	0.04	0.1	0.05	0.05	0.01	0.02	0.02	0.02	0.02
-0.636	0.16	0.04	0.02	0.03	0.03	-0.01	0.01	0.02	0.09	0.06	0.12	0.02	0.01	0.01	0	0.02	0.14	0.11	0.07	0.02	0.01	0.02	0	0.05	0.1	0.05	0.05	0.01	0.02	0.02	0.02	0.02
-0.5565	0.18	0.04	0.03	0.04	0.03	-0.01	0.01	0.03	0.09	0.06	0.12	0.02	0.01	0.01	0	0.02	0.14	0.11	0.08	0.02	0.01	0.01	0	0.06	0.1	0.05	0.05	0.01	0.02	0.02	0.02	0.02
-0.477	0.21	0.06	0.05	0.05	0.05	0	0.02	0.05	0.09	0.06	0.12	0.02	0.01	0.01	0	0.02	0.14	0.1	0.1	0.02	0.01	0.01	0.01	0.07	0.1	0.05	0.05	0.01	0.02	0.02	0.02	0.02
-0.3975	0.24	0.08	0.08	0.08	0.06	0.01	0.03	0.09	0.09	0.06	0.12	0.02	0.01	0.01	0	0.02	0.15	0.11	0.11	0.02	0.02	0.02	0.01	0.09	0.1	0.05	0.05	0.01	0.02	0.02	0.02	0.02
-0.318	0.29	0.11	0.13	0.11	0.09	0.03	0.05	0.13	0.09	0.06	0.12	0.02	0.01	0.01	0	0.02	0.16	0.11	0.13	0.03	0.03	0.03	0.03	0.12	0.1	0.05	0.05	0.01	0.02	0.02	0.02	0.02
-0.2385	0.34	0.16	0.19	0.15	0.12	0.07	0.08	0.19	0.09	0.06	0.12	0.02	0.01	0.01	0	0.02	0.18	0.12	0.16	0.06	0.06	0.05	0.05	0.15	0.1	0.05	0.05	0.01	0.02	0.02	0.02	0.02
-0.159	0.4	0.22	0.27	0.19	0.17	0.11	0.11	0.25	0.09	0.06	0.12	0.02	0.01	0.01	0	0.02	0.2	0.15	0.19	0.09	0.1	0.09	0.08	0.19	0.1	0.05	0.05	0.01	0.02	0.02	0.02	0.02
-0.0795	0.46	0.28	0.36	0.23	0.21	0.14	0.15	0.3	0.09	0.06	0.12	0.02	0.01	0.01	0	0.02	0.23	0.19	0.23	0.13	0.14	0.12	0.12	0.22	0.1	0.05	0.05	0.01	0.02	0.02	0.02	0.02
0	0.5	0.31	0.43	0.26	0.24	0.16	0.16	0.33	0.09	0.06	0.12	0.02	0.01	0.01	0	0.02	0.25	0.21	0.24	0.16	0.16	0.14	0.14	0.23	0.1	0.05	0.05	0.01	0.02	0.02	0.02	0.02
0.0795	0.48	0.3	0.44	0.25	0.24	0.16	0.15	0.33	0.09	0.06	0.12	0.02	0.01	0.01	0	0.02	0.24	0.19	0.21	0.14	0.15	0.12	0.13	0.22	0.1	0.05	0.05	0.01	0.02	0.02	0.02	0.02
0.159	0.43	0.27	0.42	0.22	0.22	0.13	0.13	0.3	0.09	0.06	0.12	0.02	0.01	0.01	0	0.02	0.21	0.16	0.17	0.11	0.12	0.09	0.1	0.19	0.1	0.05	0.05	0.01	0.02	0.02	0.02	0.02
0.2385	0.36	0.23	0.37	0.19	0.18	0.11	0.1	0.26	0.09	0.06	0.12	0.02	0.01	0.01	0	0.02	0.19	0.12	0.14	0.07	0.08	0.06	0.08	0.16	0.1	0.05	0.05	0.01	0.02	0.02	0.02	0.02
0.318	0.3	0.2	0.33	0.15	0.15	0.08	0.07	0.21	0.09	0.06	0.12	0.02	0.01	0.01	0	0.02	0.17	0.1	0.11	0.04	0.06	0.03	0.05	0.12	0.1	0.05	0.05	0.01	0.02	0.02	0.02	0.02
0.3975	0.26	0.17	0.28	0.12	0.12	0.07	0.05	0.17	0.09	0.06	0.12	0.02	0.01	0.01	0	0.02	0.15	0.09	0.09	0.03	0.04	0.01	0.03	0.09	0.1	0.05	0.05	0.01	0.02	0.02	0.02	0.02
0.477	0.22	0.15	0.25	0.1	0.1	0.06	0.04	0.13	0.09	0.06	0.12	0.02	0.01	0.01	0	0.02	0.14	0.09	0.07	0.02	0.02	0	0.02	0.07	0.1	0.05	0.05	0.01	0.02	0.02	0.02	0.02
0.5565	0.19	0.14	0.23	0.08	0.08	0.05	0.03	0.1	0.09	0.06	0.12	0.02	0.01	0.01	0	0.02	0.13	0.08	0.06	0.02	0.01	0	0.02	0.05	0.1	0.05	0.05	0.01	0.02	0.02	0.02	0.02
0.636	0.17	0.14	0.22	0.07	0.07	0.05	0.03	0.08	0.09	0.06	0.12	0.02	0.01	0.01	0	0.02	0.12	0.07	0.06	0.02	0.01	0	0.02	0.04	0.1	0.05	0.05	0.01	0.02	0.02	0.02	0.02
0.7155	0.15	0.14	0.22	0.07	0.06	0.05	0.02	0.07	0.09	0.06	0.12	0.02	0.01	0.01	0	0.02	0.12	0.06	0.06	0.02	0.01	0.01	0.01	0.03	0.1	0.05	0.05	0.01	0.02	0.02	0.02	0.02
0.795	0.14	0.14	0.22	0.06	0.06	0.05	0.02	0.06	0.09	0.06	0.12	0.02	0.01	0.01	0	0.02	0.11	0.05	0.06	0.01	0.01	0.01	0.01	0.03	0.1	0.05	0.05	0.01	0.02	0.02	0.02	0.02
0.8745	0.14	0.13	0.21	0.06	0.05	0.05	0.02	0.06	0.09	0.06	0.12	0.02	0.01	0.01	0	0.02	0.11	0.05	0.06	0.01	0.01	0.01	0.01	0.02	0.1	0.05	0.05	0.01	0.02	0.02	0.02	0.02
0.954	0.13	0.12	0.2	0.07	0.06	0.06	0.02	0.06	0.09	0.06	0.12	0.02	0.01	0.01	0	0.02	0.11	0.05	0.06	0.01	0.01	0.01	0.01	0.02	0.1	0.05	0.05	0.01	0.02	0.02	0.02	0.02
1.0335	0.13	0.11	0.18	0.07	0.06	0.06	0.03	0.07	0.09	0.06	0.12	0.02	0.01	0.01	0	0.02	0.1	0.05	0.05	0.01	0.01	0.01	0.01	0.02	0.1	0.05	0.05	0.01	0.02	0.02	0.02	0.02
1.113	0.13	0.11	0.17	0.07	0.06	0.06	0.03	0.07	0.09	0.06	0.12	0.02	0.01	0.01	0	0.02	0.1	0.05	0.05	0.01	0.01	0	0.01	0.02	0.1	0.05	0.05	0.01	0.02	0.02	0.02	0.02
1.1925	0.13	0.11	0.15	0.07	0.07	0.06	0.03	0.08	0.09	0.06	0.12	0.02	0.01	0.01	0	0.02	0.1	0.05	0.05	0.01	0.01	0	0.01	0.01	0.1	0.05	0.05	0.01	0.02	0.02	0.02	0.02
1.272	0.14	0.11	0.14	0.07	0.07	0.06	0.03	0.08	0.09	0.06	0.12	0.02	0.01	0.01	0	0.02	0.09	0.04	0.05	0.01	0.01	-0.000828	0.01	0.01	0.1	0.05	0.05	0.01	0.02	0.02	0.02	0.02
1.3515	0.14	0.11	0.12	0.07	0.07	0.06	0.03	0.08	0.09	0.06	0.12	0.02	0.01	0.01	0	0.02	0.09	0.04	0.05	0.01	0.01	-0.000721	0.01	0.01	0.1	0.05	0.05	0.01	0.02	0.02	0.02	0.02
1.431	0.14	0.11	0.11	0.07	0.07	0.05	0.03	0.08	0.09	0.06	0.12	0.02	0.01	0.01	0	0.02	0.09	0.03	0.06	0.01	0.01	0.000836	0.02	0.01	0.1	0.05	0.05	0.01	0.02	0.02	0.02	0.02
1.5105	0.14	0.11	0.09	0.07	0.07	0.05	0.03	0.08	0.09	0.06	0.12	0.02	0.01	0.01	0	0.02	0.08	0.02	0.06	0.02	0.01	0	0.02	0.01	0.1	0.05	0.05	0.01	0.02	0.02	0.02	0.02
1.59	0.14	0.11	0.08	0.06	0.07	0.04	0.03	0.08	0.09	0.06	0.12	0.02	0.01	0.01	0	0.02	0.08	0.02	0.06	0.01	0.01	0.01	0.02	0.01	0.1	0.05	0.05	0.01	0.02	0.02	0.02	0.02
