# Supplementary material for: bicoid mRNA localises to the Drosophila oocyte anterior by random Dynein-mediated transport and anchoring
Source: eLife. 2016 Oct 28;5:e17537. doi: 10.7554/eLife.17537 (PMC5125753; doi:10.7554/eLife.17537)
Supplement: Table 1—source data 1. — Includes the data in: Table 1; Figure 1 panels D–F; Figure 2, panels A–E; Figure 2—figure supplement 1, panel C. DOI: http://dx.doi.org/10.7554/eLife.17537.008 [file elife-17537-table1-data1.xlsx]

## Sheet: Sheet1
Genotype	speed (um/s)	angle (-90:+90)	oocyte	movie	Distance from anterior (um)	Track distance (um)
bcdGFP/bcdGFP	0.7528	-20.0047	1	1	9.67	2.04328
bcdGFP/bcdGFP	1.013	-33.5788	1	1	4.912	0.857013
bcdGFP/bcdGFP	0.624333	-33.721	1	1	8.747	1.02675
bcdGFP/bcdGFP	0.71	-85.0106	1	1	5.334	0.379438
bcdGFP/bcdGFP	0.4605	20.3037	1	1	6.85	0.717586
bcdGFP/bcdGFP	0.521333	-35.6679	1	1	9.106	2.09746
bcdGFP/bcdGFP	0.885125	-16.7883	1	1	10.512	1.8488
bcdGFP/bcdGFP	0.437857	87.4007	1	1	1.537	0.793817
bcdGFP/bcdGFP	0.469	14.8586	1	1	2.013	0.506952
bcdGFP/bcdGFP	0.478875	29.0388	1	1	1.589	1.05686
bcdGFP/bcdGFP	0.738733	-23.7055	1	1	3.638	3.10171
bcdGFP/bcdGFP	0.444125	5.16149	1	1	4.573	1.88966
bcdGFP/bcdGFP	0.6885	88.6325	1	1	5.933	0.377107
bcdGFP/bcdGFP	0.874	35.4512	1	1	5.752	1.00171
bcdGFP/bcdGFP	0.612286	36.6188	1	1	8.296	1.23221
bcdGFP/bcdGFP	0.436	-69.4018	1	1	4.062	0.477528
bcdGFP/bcdGFP	0.6338	63.347	1	1	5.124	0.873856
bcdGFP/bcdGFP	0.5032	-81.8462	1	1	4.936	0.683914
bcdGFP/bcdGFP	0.4108	-3.37848	1	1	2.663	0.559973
bcdGFP/bcdGFP	1.008	28.7607	1	1	8.604	1.70424
bcdGFP/bcdGFP	0.648	15.474	1	1	9.169	0.367315
bcdGFP/bcdGFP	0.88225	-19.7663	1	1	0.311	0.99354
bcdGFP/bcdGFP	1.084	60.8712	1	1	4.115	0.8998
bcdGFP/bcdGFP	1.002	-15.3598	1	1	3.155	1.68001
bcdGFP/bcdGFP	0.483375	-20.5813	1	1	5.172	2.38951
bcdGFP/bcdGFP	0.695333	58.552	1	1	4.72	0.588433
bcdGFP/bcdGFP	0.4347	-8.29301	1	1	4.376	1.14396
bcdGFP/bcdGFP	0.304333	-72.5528	1	1	5.325	0.256815
bcdGFP/bcdGFP	0.401917	4.49162	1	1	2.632	1.27692
bcdGFP/bcdGFP	0.6414	11.993	1	1	12.626	0.904748
bcdGFP/bcdGFP	1.252	-66.4677	1	1	6.938	1.89347
bcdGFP/bcdGFP	1.05567	-75.948	1	1	8.904	1.75863
bcdGFP/bcdGFP	0.9385	-85.8913	1	1	9.424	0.530363
bcdGFP/bcdGFP	0.2772	10.8403	1	1	9.936	0.382832
bcdGFP/bcdGFP	1.089	14.7532	1	1	6.57	2.71346
bcdGFP/bcdGFP	1.22475	-4.01817	1	1	7.027	1.75531
bcdGFP/bcdGFP	0.467	9.87209	1	1	2.889	0.390786
bcdGFP/bcdGFP	0.581667	-17.0674	1	1	2.959	0.477007
bcdGFP/bcdGFP	0.544	-36.2878	1	1	4.824	0.905647
bcdGFP/bcdGFP	0.861812	54.7276	1	2	8.631	3.81668
bcdGFP/bcdGFP	0.348263	-46.7548	1	2	4.686	1.80114
bcdGFP/bcdGFP	0.84425	-11.6406	1	2	1.065	0.951571
bcdGFP/bcdGFP	0.7945	-11.0201	1	2	2.089	1.31831
bcdGFP/bcdGFP	0.2995	-23.9273	1	2	3.929	0.330394
bcdGFP/bcdGFP	0.377429	27.9538	1	2	1.445	0.738119
bcdGFP/bcdGFP	0.576	51.7601	1	2	5.235	1.12932
bcdGFP/bcdGFP	0.3072	-88.944	1	2	3.662	0.434074
bcdGFP/bcdGFP	0.6975	-74.3911	1	2	3.376	0.397666
bcdGFP/bcdGFP	0.818556	-79.7032	1	2	21.564	1.90772
bcdGFP/bcdGFP	1.0085	-16.049	1	2	19.789	1.13941
bcdGFP/bcdGFP	0.764	56.6711	1	2	11.908	1.49606
bcdGFP/bcdGFP	0.679	76.8189	1	2	13.231	0.552558
bcdGFP/bcdGFP	0.451	-16.0966	1	2	9.698	0.364281
bcdGFP/bcdGFP	1.1365	87.7765	1	2	9.486	1.26295
bcdGFP/bcdGFP	1.02817	58.7196	1	2	7.522	1.67557
bcdGFP/bcdGFP	0.732	79.8875	1	2	13.522	0.825829
bcdGFP/bcdGFP	0.6128	-11.2186	1	2	5.933	1.7219
bcdGFP/bcdGFP	0.9458	65.6717	1	2	8.744	2.62401
bcdGFP/bcdGFP	0.719118	85.6783	1	2	8.709	3.42373
bcdGFP/bcdGFP	0.4915	-25.9372	1	2	11.684	0.816214
bcdGFP/bcdGFP	0.49025	6.52576	1	2	4.934	0.545535
bcdGFP/bcdGFP	0.6532	80.4741	1	2	11.152	0.888248
bcdGFP/bcdGFP	0.381667	51.4576	1	2	9.464	0.60986
bcdGFP/bcdGFP	0.397833	-65.7209	1	2	9.194	0.661508
bcdGFP/bcdGFP	0.7205	-26.9489	1	2	8.206	0.800978
bcdGFP/bcdGFP	0.565667	28.105	1	2	5.155	0.931883
bcdGFP/bcdGFP	0.334143	-34.8639	1	2	5.662	0.622782
bcdGFP/bcdGFP	0.5195	-39.9311	1	2	5.344	0.584234
bcdGFP/bcdGFP	0.2515	83.8603	1	2	5.588	0.757344
bcdGFP/bcdGFP	0.431	24.7214	1	2	6.99	1.04255
bcdGFP/bcdGFP	0.3504	-5.81897	1	2	5.504	0.47344
bcdGFP/bcdGFP	0.862667	-15.7013	1	2	4.7	0.709474
bcdGFP/bcdGFP	1.0275	45.8983	1	2	10.761	1.39812
bcdGFP/bcdGFP	0.718667	43.944	1	2	8.536	0.613873
bcdGFP/bcdGFP	0.56475	53.4412	1	2	10.869	0.626209
bcdGFP/bcdGFP	0.309727	49.2169	1	2	5.044	0.923152
bcdGFP/bcdGFP	0.418	86.7905	1	2	12.939	0.53584
bcdGFP/bcdGFP	1.121	69.735	1	2	7.4	1.26745
bcdGFP/bcdGFP	1.1485	-85.6147	1	2	14.416	0.653914
bcdGFP/bcdGFP	0.251278	5.13059	1	2	0.605	1.21888
bcdGFP/bcdGFP	0.4784	-43.7573	1	2	10.969	0.652106
bcdGFP/bcdGFP	0.4072	74.71	1	2	2.941	0.576403
bcdGFP/bcdGFP	0.981	13.1811	1	2	17.921	0.552558
bcdGFP/bcdGFP	0.572	-32.2869	1	2	5.233	0.453049
bcdGFP/bcdGFP	0.997	-59.682	1	2	13.684	1.67393
bcdGFP/bcdGFP	0.509	59.7905	1	2	2.028	0.703548
bcdGFP/bcdGFP	0.406	-15.8622	1	2	2.613	0.662216
bcdGFP/bcdGFP	0.338	-31.438	1	2	1.618	0.642284
bcdGFP/bcdGFP	1.09233	37.7065	1	2	1.077	1.8492
bcdGFP/bcdGFP	0.25825	-8.82386	1	2	2.528	0.280318
bcdGFP/bcdGFP	0.286286	53.151	1	2	4.735	0.5486
bcdGFP/bcdGFP	0.5565	-32.2756	1	2	1.751	0.314611
bcdGFP/bcdGFP	0.491333	9.46232	1	2	2.84	0.401462
bcdGFP/bcdGFP	0.4804	58.0037	1	2	2.811	0.666209
bcdGFP/bcdGFP	0.855722	20.2837	1	3	12.922	4.2346
bcdGFP/bcdGFP	0.2164	-78.7323	1	3	17.642	0.26613
bcdGFP/bcdGFP	0.5456	-65.8329	1	3	4.999	1.50709
bcdGFP/bcdGFP	0.567286	-78.0163	1	3	12.123	1.11735
bcdGFP/bcdGFP	0.855917	59.7672	1	3	5.66	2.79634
bcdGFP/bcdGFP	0.314	58.5298	1	3	4.767	0.601469
bcdGFP/bcdGFP	0.443667	-33.6475	1	3	4.37	0.373591
bcdGFP/bcdGFP	0.255286	-61.5363	1	3	13.007	0.404951
bcdGFP/bcdGFP	0.8406	-5.45819	1	3	8.749	2.28134
bcdGFP/bcdGFP	0.882	14.0238	1	3	-0.027	2.22842
bcdGFP/bcdGFP	0.513667	-51.0685	1	3	12.709	0.428077
bcdGFP/bcdGFP	0.247714	-58.8564	1	3	17.241	0.436981
bcdGFP/bcdGFP	0.895167	25.6954	1	3	5.678	1.44377
bcdGFP/bcdGFP	0.833333	-17.7935	1	3	7.449	2.14669
bcdGFP/bcdGFP	0.446	-64.9791	1	3	16.69	0.862988
bcdGFP/bcdGFP	0.230778	-1.36936	1	3	5.152	0.502143
bcdGFP/bcdGFP	1.39825	40.3091	1	3	6.244	1.57363
bcdGFP/bcdGFP	0.623143	-13.0998	1	3	5.191	1.14274
bcdGFP/bcdGFP	0.857455	-27.9213	1	3	5.017	2.85313
bcdGFP/bcdGFP	0.755	79.3474	1	3	4.228	0.427365
bcdGFP/bcdGFP	0.930167	9.46838	1	3	6.382	1.5562
bcdGFP/bcdGFP	0.474846	0.056255	1	3	7.019	2.037
bcdGFP/bcdGFP	1.69383	37.1824	1	3	8.01	2.67724
bcdGFP/bcdGFP	0.3286	76.3889	1	3	4.304	0.424934
bcdGFP/bcdGFP	0.7145	-87.4568	1	3	3.817	0.788777
bcdGFP/bcdGFP	0.3236	34.2514	1	3	5.088	0.424643
bcdGFP/bcdGFP	1.0496	3.38291	2	4	12.628	2.86399
bcdGFP/bcdGFP	1.1321	-13.9336	2	4	6.605	3.11465
bcdGFP/bcdGFP	0.3902	-32.7843	2	4	7.497	0.491248
bcdGFP/bcdGFP	0.569571	27.0463	2	4	4.459	1.01163
bcdGFP/bcdGFP	0.8042	20.4902	2	4	2.038	1.11985
bcdGFP/bcdGFP	0.315667	18.5042	2	4	2.451	0.261521
bcdGFP/bcdGFP	0.794	19.5414	2	4	2.564	1.0972
bcdGFP/bcdGFP	0.9555	-13.8942	2	4	2.999	2.54445
bcdGFP/bcdGFP	1.1998	24.3878	2	4	1.305	1.43615
bcdGFP/bcdGFP	0.94775	-48.9412	2	4	2.506	1.05963
bcdGFP/bcdGFP	1.06825	-70.1168	2	4	3.151	1.17611
bcdGFP/bcdGFP	1.08618	63.5528	2	4	2.541	3.26243
bcdGFP/bcdGFP	0.9234	-70.8917	2	4	6.832	1.26468
bcdGFP/bcdGFP	0.63975	-28.8179	2	4	4.692	0.705354
bcdGFP/bcdGFP	1.70427	15.5975	2	4	5.028	5.22543
bcdGFP/bcdGFP	0.58475	1.60851	2	4	6.465	0.641253
bcdGFP/bcdGFP	0.9826	67.4065	2	4	4.439	2.67315
bcdGFP/bcdGFP	0.601222	-31.6826	2	4	4.411	1.44893
bcdGFP/bcdGFP	0.8735	-40.5757	2	4	3.643	0.485816
bcdGFP/bcdGFP	0.238462	-19.3561	2	4	3.645	1.51461
bcdGFP/bcdGFP	1.51971	-78.8122	2	4	4.435	2.94293
bcdGFP/bcdGFP	0.591	9.36208	2	4	5.057	0.657761
bcdGFP/bcdGFP	0.133714	56.1649	2	4	5.15	0.219107
bcdGFP/bcdGFP	0.9195	31.079	2	4	6.738	0.51141
bcdGFP/bcdGFP	0.6836	24.1809	2	4	7.002	1.78459
bcdGFP/bcdGFP	0.382667	46.1963	2	4	5.078	0.304829
bcdGFP/bcdGFP	0.372	-51.8864	2	4	5.344	0.294869
bcdGFP/bcdGFP	0.324733	86.2765	2	4	7.851	1.26267
bcdGFP/bcdGFP	0.515333	66.3155	2	4	7.154	0.774211
bcdGFP/bcdGFP	0.414	-15.0328	2	4	6.755	0.65543
bcdGFP/bcdGFP	0.455	-19.1762	2	4	7.347	0.831116
bcdGFP/bcdGFP	1.3192	37.0698	2	4	8.526	1.83481
bcdGFP/bcdGFP	0.904	75.665	2	4	5.601	2.97668
bcdGFP/bcdGFP	1.1192	2.92975	2	4	5.56	1.48694
bcdGFP/bcdGFP	1.3712	62.5383	2	4	4.143	1.91476
bcdGFP/bcdGFP	1.40033	-77.9639	2	4	5.597	1.16051
bcdGFP/bcdGFP	1.19657	9.05912	2	4	1.581	4.64899
bcdGFP/bcdGFP	0.91575	73.4814	2	4	2.857	2.00474
bcdGFP/bcdGFP	0.733857	-18.0929	2	4	13.332	1.6422
bcdGFP/bcdGFP	2.194	-10.7515	2	4	12.134	1.22755
bcdGFP/bcdGFP	0.909667	10.0705	2	4	11.378	0.743454
bcdGFP/bcdGFP	0.855	-4.08562	2	4	11.299	0.954425
bcdGFP/bcdGFP	0.7295	66.009	2	4	15.261	0.408271
bcdGFP/bcdGFP	0.743	-76.1225	2	4	15.701	0.61289
bcdGFP/bcdGFP	1.105	53.1059	2	4	2.943	10.3958
bcdGFP/bcdGFP	1.689	11.6196	2	4	9.028	0.943332
bcdGFP/bcdGFP	0.916909	-76.1101	2	4	6.792	2.75352
bcdGFP/bcdGFP	1.03233	63.8207	2	4	12.903	1.72718
bcdGFP/bcdGFP	1.1755	-30.3408	2	4	1.708	1.95589
bcdGFP/bcdGFP	1.164	6.94345	2	4	0.97	1.60477
bcdGFP/bcdGFP	0.4475	47.5187	2	4	7.504	0.482713
bcdGFP/bcdGFP	0.441	-48.9909	2	4	10.332	0.365754
bcdGFP/bcdGFP	1.14329	-27.6275	2	4	5.144	2.21901
bcdGFP/bcdGFP	0.6498	-35.4484	2	4	4.617	0.894875
bcdGFP/bcdGFP	0.7105	-6.94597	2	4	2.704	0.396913
bcdGFP/bcdGFP	1.1335	3.82648	2	4	4.134	0.61437
bcdGFP/bcdGFP	0.951	-80.904	2	4	4.97	0.797023
bcdGFP/bcdGFP	0.356556	-6.16666	2	4	7.39	0.875063
bcdGFP/bcdGFP	0.909333	-51.8257	2	4	8.391	0.755596
bcdGFP/bcdGFP	0.496571	4.34399	2	4	7.218	0.963769
bcdGFP/bcdGFP	0.287667	-77.2906	2	4	7.535	0.240902
bcdGFP/bcdGFP	0.33075	15.1812	2	4	7.33	0.33986
bcdGFP/bcdGFP	0.48225	82.5267	2	4	3.678	0.530506
bcdGFP/bcdGFP	1.07333	-5.53979	2	4	1.262	0.901209
bcdGFP/bcdGFP	1.2085	61.3895	2	4	1.349	0.676618
bcdGFP/bcdGFP	0.668167	-9.59741	2	4	1.566	1.11561
bcdGFP/bcdGFP	1.055	14.0067	2	4	2.071	2.3509
bcdGFP/bcdGFP	1.1245	23.1494	2	4	7.372	1.22351
bcdGFP/bcdGFP	0.2625	88.894	2	4	6.09	0.259048
bcdGFP/bcdGFP	0.333571	57.2995	2	4	3.678	0.594173
bcdGFP/bcdGFP	1.05667	23.5538	2	4	3.316	0.868346
bcdGFP/bcdGFP	0.446	19.3541	2	4	2.502	0.591422
bcdGFP/bcdGFP	0.9625	-82.3009	2	4	2.605	0.507576
bcdGFP/bcdGFP	0.6635	-6.61578	2	4	2.128	0.711739
bcdGFP/bcdGFP	1.5685	-17.3149	2	4	2.162	0.873588
bcdGFP/bcdGFP	1.462	-23.0371	2	4	1.691	0.792175
bcdGFP/bcdGFP	1.48917	80.7933	2	4	4.625	2.4688
bcdGFP/bcdGFP	1.197	20.2826	2	4	2.332	1.3241
bcdGFP/bcdGFP	0.9954	69.3956	2	4	6.783	1.3867
bcdGFP/bcdGFP	0.498667	-14.6035	2	4	8.713	0.416454
bcdGFP/bcdGFP	0.519	62.6583	2	4	3.638	0.428917
bcdGFP/bcdGFP	1.4135	-53.6249	2	4	6.917	1.57486
bcdGFP/bcdGFP	1.09625	-3.24235	2	4	2.325	1.21995
bcdGFP/bcdGFP	0.6952	-12.732	2	4	3.332	0.948317
bcdGFP/bcdGFP	1.223	-27.4441	2	4	5.017	0.670452
bcdGFP/bcdGFP	0.998	10.9281	2	4	2.532	0.55914
bcdGFP/bcdGFP	1.0195	14.2191	2	4	2.04	1.13992
bcdGFP/bcdGFP	0.762	-31.3088	2	4	5.223	0.427211
bcdGFP/bcdGFP	1.381	20.426	2	4	3.581	0.773644
bcdGFP/bcdGFP	0.9135	85.5926	2	4	3.219	0.507501
bcdGFP/bcdGFP	0.428333	10.747	2	4	1.384	0.359302
bcdGFP/bcdGFP	1.14967	-4.71351	2	4	1.56	0.94921
bcdGFP/bcdGFP	1.2275	9.62669	2	4	1.139	0.687684
bcdGFP/bcdGFP	0.306333	56.9151	2	4	0.492	0.236315
bcdGFP/bcdGFP	1.1025	16.0096	2	4	1.678	0.612766
bcdGFP/bcdGFP	0.54	-69.2888	2	4	2.019	0.302552
bcdGFP/bcdGFP	0.698714	70.7829	2	4	12.495	1.29729
bcdGFP/bcdGFP	1.137	51.8072	2	4	2.767	0.632369
bcdGFP/bcdGFP	0.669	7.04751	2	4	2.91	0.366771
bcdGFP/bcdGFP	0.546667	-15.6147	2	4	2.286	0.880496
bcdGFP/bcdGFP	0.44075	20.2621	2	4	2.095	0.456232
bcdGFP/bcdGFP	1.18075	50.5235	2	4	2.717	1.29294
bcdGFP/bcdGFP	1.4375	-42.5236	2	4	3.273	0.801901
bcdGFP/bcdGFP	0.409	-4.51399	2	4	6.609	0.228709
bcdGFP/bcdGFP	0.3338	-30.6828	2	4	3.322	0.454648
bcdGFP/bcdGFP	0.54325	-14.6808	2	4	1.215	0.603709
bcdGFP/bcdGFP	0.42675	86.9935	2	4	2.636	0.476656
bcdGFP/bcdGFP	0.501	-0.204627	2	4	1.056	0.280002
bcdGFP/bcdGFP	0.744	88.1642	2	4	3.211	0.62432
bcdGFP/bcdGFP	0.419	-56.2756	2	4	8.064	0.462897
bcdGFP/bcdGFP	0.38525	-84.9381	2	4	5.596	0.43068
bcdGFP/bcdGFP	0.220571	-0.134497	2	4	5.588	0.426001
bcdGFP/bcdGFP	0.947667	-19.548	2	4	2.243	0.765099
bcdGFP/bcdGFP	0.5	-72.9176	2	4	2.192	0.415323
bcdGFP/bcdGFP	0.7386	-16.1879	2	4	6.388	1.39532
bcdGFP/bcdGFP	0.7915	-18.8994	2	4	6.173	0.429135
bcdGFP/bcdGFP	0.61525	-26.6032	2	4	7.336	0.672162
bcdGFP/bcdGFP	1.13483	-15.9625	2	5	10.614	1.83994
bcdGFP/bcdGFP	1.02418	31.4613	2	5	9.374	3.08092
bcdGFP/bcdGFP	1.2878	29.9175	2	5	14.413	3.54084
bcdGFP/bcdGFP	0.739667	-4.44841	2	5	12.918	0.618864
bcdGFP/bcdGFP	1.72467	-20.6674	2	5	18.202	1.44499
bcdGFP/bcdGFP	0.727	41.4461	2	5	19.818	0.787109
bcdGFP/bcdGFP	0.759	58.0552	2	5	16.958	0.400679
bcdGFP/bcdGFP	1.063	15.6621	2	5	18.801	0.889008
bcdGFP/bcdGFP	0.6065	45.9548	2	5	13.66	0.339458
bcdGFP/bcdGFP	1.234	40.9102	2	5	8.94	4.1046
bcdGFP/bcdGFP	0.6155	-57.4143	2	5	9.275	0.345365
bcdGFP/bcdGFP	0.562	-54.5896	2	5	8.307	0.314102
bcdGFP/bcdGFP	0.4144	-33.4149	2	5	8.744	0.57745
bcdGFP/bcdGFP	1.12044	4.52315	2	5	2.195	2.78969
bcdGFP/bcdGFP	0.629429	-8.71975	2	5	2.062	1.15434
bcdGFP/bcdGFP	1.13033	-6.02829	2	5	2.641	0.93316
bcdGFP/bcdGFP	0.327167	-1.46612	2	5	2.645	0.547179
bcdGFP/bcdGFP	1.23137	3.38745	2	5	2.617	2.72476
bcdGFP/bcdGFP	1.138	-6.66782	2	5	2.575	0.637311
bcdGFP/bcdGFP	0.64025	-18.7958	2	5	2.977	1.40598
bcdGFP/bcdGFP	1.107	29.1089	2	5	3.095	0.61463
bcdGFP/bcdGFP	1.1615	25.6188	2	5	3.445	0.64989
bcdGFP/bcdGFP	1.4185	22.0041	2	5	3.213	0.787353
bcdGFP/bcdGFP	0.8835	-17.9519	2	5	1.247	0.937649
bcdGFP/bcdGFP	0.597667	60.1812	2	5	0.064	0.480635
bcdGFP/bcdGFP	0.7988	21.8508	2	5	0.454	1.0774
bcdGFP/bcdGFP	0.4675	-35.9466	2	5	2.459	0.260634
bcdGFP/bcdGFP	0.436	-38.537	2	5	2.45	0.364354
bcdGFP/bcdGFP	0.550333	-69.3256	2	5	2.984	0.453184
bcdGFP/bcdGFP	1.30975	-16.9096	2	5	4.234	1.46117
bcdGFP/bcdGFP	1.0255	3.77915	2	5	1.813	2.83717
bcdGFP/bcdGFP	0.433889	9.9831	2	5	1.509	1.06716
bcdGFP/bcdGFP	0.624	0.98776	2	5	2.132	0.348052
bcdGFP/bcdGFP	0.407833	24.7575	2	5	1.245	0.680551
bcdGFP/bcdGFP	1.161	8.26792	2	5	2.362	2.58689
bcdGFP/bcdGFP	1.208	29.7133	2	5	2.394	0.675865
bcdGFP/bcdGFP	1.05713	84.3796	2	5	17.307	2.33824
bcdGFP/bcdGFP	0.79	-29.4186	2	5	19.665	0.871358
bcdGFP/bcdGFP	0.717333	-37.5566	2	5	19.316	0.584042
bcdGFP/bcdGFP	0.965	-60.5376	2	5	15.73	0.805119
bcdGFP/bcdGFP	0.795333	59.9353	2	5	14.003	0.666697
bcdGFP/bcdGFP	0.54725	-39.4832	2	5	16.09	1.20625
bcdGFP/bcdGFP	0.809	-85.8353	2	5	6.294	0.413091
bcdGFP/bcdGFP	0.746111	-2.31653	2	5	2.549	1.85552
bcdGFP/bcdGFP	0.6725	9.40181	2	5	2.607	1.08964
bcdGFP/bcdGFP	1.1262	7.82454	2	5	2.712	1.56457
bcdGFP/bcdGFP	1.29675	4.36526	2	5	2.731	1.44519
bcdGFP/bcdGFP	1.24805	2.65069	2	5	3.533	7.5681
bcdGFP/bcdGFP	1.33322	18.0905	2	5	2.937	3.31381
bcdGFP/bcdGFP	0.8645	-85.9651	2	5	12.44	0.483198
bcdGFP/bcdGFP	0.69	-35.3986	2	5	10.478	0.958116
bcdGFP/bcdGFP	1.111	-82.4175	2	5	9.924	0.621434
bcdGFP/bcdGFP	0.491667	-89.4791	2	5	9.698	0.770032
bcdGFP/bcdGFP	0.87575	-83.7953	2	5	8.06	0.980745
bcdGFP/bcdGFP	1.72086	2.22297	2	5	3.388	3.35152
bcdGFP/bcdGFP	1.37425	-80.789	2	5	6.041	1.49933
bcdGFP/bcdGFP	1.12375	-34.8706	2	5	3.874	1.19813
bcdGFP/bcdGFP	0.541333	-17.3463	2	5	13.261	1.781
bcdGFP/bcdGFP	1.166	-67.0783	2	5	17.076	0.978244
bcdGFP/bcdGFP	0.722667	-21.3719	2	5	14.123	1.80835
bcdGFP/bcdGFP	0.5235	-3.37812	2	5	13.954	0.288501
bcdGFP/bcdGFP	0.3412	-51.8847	2	5	17.183	0.460109
bcdGFP/bcdGFP	0.36875	-15.3421	2	5	13.339	0.404412
bcdGFP/bcdGFP	1.1172	-49.6469	2	5	12.843	1.52742
bcdGFP/bcdGFP	0.390667	64.1432	2	5	13.431	0.325596
bcdGFP/bcdGFP	0.745667	-18.8745	2	5	14.961	1.23649
bcdGFP/bcdGFP	0.6133	-8.5291	2	5	23.099	1.70587
bcdGFP/bcdGFP	0.3594	-54.2461	2	5	19.984	0.492893
bcdGFP/bcdGFP	0.609	23.4056	2	5	18.53	0.835771
bcdGFP/bcdGFP	0.658667	19.9831	2	5	19.016	0.526711
bcdGFP/bcdGFP	1.07175	45.3394	2	5	7.936	1.19362
bcdGFP/bcdGFP	0.377	-52.4059	2	5	10.673	0.411433
bcdGFP/bcdGFP	0.849333	48.867	2	5	10.246	0.712973
bcdGFP/bcdGFP	0.8855	-54.9002	2	5	9.287	0.958257
bcdGFP/bcdGFP	0.82875	-30.8321	2	5	6.718	0.895568
bcdGFP/bcdGFP	0.9905	-3.93096	2	5	2.27	0.554304
bcdGFP/bcdGFP	0.675333	-38.6113	2	5	1.71	0.552855
bcdGFP/bcdGFP	0.607333	29.9816	2	5	1.081	0.510283
bcdGFP/bcdGFP	0.57925	24.4364	2	5	2.942	0.626084
bcdGFP/bcdGFP	0.7625	-33.3526	2	5	3.244	0.423798
bcdGFP/bcdGFP	1.44175	-35.1678	2	5	4.59	1.60251
bcdGFP/bcdGFP	0.51	-31.5198	2	5	4.213	1.11325
bcdGFP/bcdGFP	0.600667	-67.7944	2	5	2.545	0.50009
bcdGFP/bcdGFP	1.11956	-12.7771	2	5	18.454	2.80342
bcdGFP/bcdGFP	0.512167	49.689	2	5	18.012	0.856344
bcdGFP/bcdGFP	0.539857	-71.4786	2	5	14.569	1.0483
bcdGFP/bcdGFP	0.312	5.31455	2	5	10.156	0.172743
bcdGFP/bcdGFP	1.04	6.37641	2	5	9.629	0.873403
bcdGFP/bcdGFP	1.6295	34.7528	2	5	7.961	1.82445
bcdGFP/bcdGFP	1.764	-50.04	2	5	10.308	1.47294
bcdGFP/bcdGFP	0.546333	57.9537	2	5	9.852	0.444775
bcdGFP/bcdGFP	1.83343	19.2741	2	5	6.164	3.56269
bcdGFP/bcdGFP	1.146	9.04757	2	5	4.125	0.635912
bcdGFP/bcdGFP	0.66975	-38.7645	2	5	11.76	0.683574
bcdGFP/bcdGFP	0.314667	32.0822	2	5	8.823	0.237228
bcdGFP/bcdGFP	1.648	-47.5744	2	5	11.353	1.82618
bcdGFP/bcdGFP	0.7115	-54.596	2	5	12.099	0.39873
bcdGFP/bcdGFP	0.7155	-19.0935	2	5	15.296	0.797895
bcdGFP/bcdGFP	0.541636	32.6349	2	5	21.403	1.47603
bcdGFP/bcdGFP	0.701333	49.7045	2	5	22.837	0.569017
bcdGFP/bcdGFP	1.1435	54.3853	2	5	20.915	1.81684
bcdGFP/bcdGFP	0.732333	42.562	2	5	20.324	0.615033
bcdGFP/bcdGFP	0.359333	7.29116	2	5	1.221	0.299421
bcdGFP/bcdGFP	0.336667	70.0696	2	5	1.57	0.278692
bcdGFP/bcdGFP	0.52275	9.37979	2	5	11.334	0.570629
bcdGFP/bcdGFP	1.02	17.926	2	5	11.259	0.854481
bcdGFP/bcdGFP	0.454667	44.0434	2	5	6.872	0.381184
bcdGFP/bcdGFP	1.094	-49.0283	2	5	7.218	0.603947
bcdGFP/bcdGFP	0.98025	-5.04707	2	5	2.699	1.09123
bcdGFP/bcdGFP	1.38267	-2.48308	2	5	3.019	1.15408
bcdGFP/bcdGFP	0.908	72.3328	2	5	8.22	1.01487
bcdGFP/bcdGFP	1.1155	21.1169	2	5	11.067	0.621752
bcdGFP/bcdGFP	0.6665	55.2651	2	5	24.127	0.365053
bcdGFP/bcdGFP	1.072	-63.1336	2	5	18.623	0.59525
bcdGFP/bcdGFP	0.33875	0.795724	2	5	2.542	0.360035
bcdGFP/bcdGFP	0.389667	1.61102	2	5	2.155	0.320127
bcdGFP/bcdGFP	1.306	-2.03131	2	5	1.756	1.01564
bcdGFP/bcdGFP	0.203857	-51.0149	2	5	1.155	0.357644
bcdGFP/bcdGFP	0.6985	-35.2476	2	5	3.599	0.367347
bcdGFP/bcdGFP	0.4066	-72.4693	2	5	18.88	0.561058
bcdGFP/bcdGFP	1.53733	13.0083	2	5	8.812	1.25726
bcdGFP/bcdGFP	0.751667	-30.9952	2	5	2.993	0.625284
bcdGFP/bcdGFP	1.244	7.11435	2	5	7.016	1.33226
bcdGFP/bcdGFP	0.722	-35.622	2	5	13.596	0.394894
bcdGFP/bcdGFP	0.7985	-34.8292	3	6	4.37	3.02732
bcdGFP/bcdGFP	0.326333	-59.2112	3	6	4.244	0.224664
bcdGFP/bcdGFP	0.5387	3.45298	3	6	2.032	1.47768
bcdGFP/bcdGFP	0.5885	30.312	3	6	3.115	0.964913
bcdGFP/bcdGFP	0.527308	-16.5641	3	6	2.235	3.57433
bcdGFP/bcdGFP	0.868714	9.13078	3	6	0.243	1.67624
bcdGFP/bcdGFP	0.3424	-30.7128	3	6	1.893	0.469911
bcdGFP/bcdGFP	0.4062	4.36607	3	6	1.607	0.538563
bcdGFP/bcdGFP	0.467333	-21.06	3	6	0.713	0.731887
bcdGFP/bcdGFP	0.542571	-56.7524	3	6	4.412	1.04148
bcdGFP/bcdGFP	0.752167	-39.7996	3	6	1.519	1.23261
bcdGFP/bcdGFP	0.481	21.9329	3	6	4.521	1.05215
bcdGFP/bcdGFP	0.841167	77.7523	3	6	4.541	1.56973
bcdGFP/bcdGFP	0.499	24.5885	3	6	1.45	0.55756
bcdGFP/bcdGFP	0.760833	9.29619	3	6	1.785	2.49477
bcdGFP/bcdGFP	0.501	63.7549	3	6	2.044	0.961077
bcdGFP/bcdGFP	0.297	-76.9628	3	6	1.664	0.403398
bcdGFP/bcdGFP	0.207	81.6824	3	6	1.454	0.172818
bcdGFP/bcdGFP	0.511667	-54.125	3	6	0.4	0.414663
bcdGFP/bcdGFP	1.2985	42.7586	3	6	3.45	0.723216
bcdGFP/bcdGFP	0.558667	-35.3625	3	6	2.215	0.456158
bcdGFP/bcdGFP	1.18567	-29.9418	3	6	5.568	2.20188
bcdGFP/bcdGFP	1.11367	-73.2714	3	6	2.584	0.934551
bcdGFP/bcdGFP	0.719333	-76.0561	3	6	2.496	1.20346
bcdGFP/bcdGFP	0.647	-21.1061	3	6	4.761	0.719251
bcdGFP/bcdGFP	0.75875	-17.6865	3	6	4.37	0.750473
bcdGFP/bcdGFP	1.22367	-47.3826	3	6	4.281	1.02053
bcdGFP/bcdGFP	0.5378	71.3883	3	6	2.431	0.717524
bcdGFP/bcdGFP	0.652833	42.0841	4	7	0.44	3.25266
bcdGFP/bcdGFP	0.53575	-84.2225	4	7	4.818	0.596028
bcdGFP/bcdGFP	0.66925	63.4349	4	7	6.392	0.744611
bcdGFP/bcdGFP	0.555833	-39.2502	4	7	2.016	0.924598
bcdGFP/bcdGFP	0.4628	-48.5323	4	7	4.512	0.631231
bcdGFP/bcdGFP	0.56725	3.97378	4	7	0.243	0.620492
bcdGFP/bcdGFP	0.798	-73.169	4	7	10.392	0.666553
bcdGFP/bcdGFP	0.469286	65.9041	4	7	12.433	0.871982
bcdGFP/bcdGFP	0.378333	77.5397	4	7	0.734	0.634956
bcdGFP/bcdGFP	0.3895	22.9041	4	7	0.605	0.434236
bcdGFP/bcdGFP	0.520667	22.7144	4	7	2.987	0.419539
bcdGFP/bcdGFP	1.048	-89.3361	4	7	6.218	1.72612
bcdGFP/bcdGFP	0.768	87.869	4	7	4.427	0.430298
bcdGFP/bcdGFP	0.8288	-30.8353	4	7	3.482	2.29431
bcdGFP/bcdGFP	0.5745	-13.8633	4	7	2.704	0.321361
bcdGFP/bcdGFP	0.719111	33.9313	4	7	4.231	1.77894
bcdGFP/bcdGFP	0.437333	42.0701	4	7	5.6	0.35968
bcdGFP/bcdGFP	0.215	-62.4223	4	7	1.086	0.177124
bcdGFP/bcdGFP	0.2918	-38.7834	4	7	1.135	0.796644
bcdGFP/bcdGFP	0.7095	-46.359	4	7	0.984	0.775207
bcdGFP/bcdGFP	0.57775	-11.5177	4	7	13.196	1.35223
bcdGFP/bcdGFP	0.3433	-45.5169	4	7	6.035	0.94049
bcdGFP/bcdGFP	0.30525	7.65065	4	7	5.135	0.338009
bcdGFP/bcdGFP	0.443	42.2951	4	7	5.419	0.359611
bcdGFP/bcdGFP	1.04683	-67.9461	4	7	5.874	1.64323
bcdGFP/bcdGFP	0.4728	14.8642	4	7	11.498	1.42674
bcdGFP/bcdGFP	0.660857	-64.4436	4	7	17.348	1.24479
bcdGFP/bcdGFP	0.879	-87.2161	4	7	16.079	0.473559
bcdGFP/bcdGFP	0.8288	36.7273	4	7	13.294	1.1254
bcdGFP/bcdGFP	0.606	-2.82561	4	7	11.078	1.3997
bcdGFP/bcdGFP	0.783	-11.8435	4	7	11.093	0.652899
bcdGFP/bcdGFP	0.31	-13.7633	4	7	8.365	0.458155
bcdGFP/bcdGFP	0.556667	-12.2078	4	7	8.386	1.02621
bcdGFP/bcdGFP	0.434778	-76.8102	4	7	5.645	1.03428
bcdGFP/bcdGFP	0.9644	7.12502	4	8	11.312	1.32221
bcdGFP/bcdGFP	0.936	59.5612	4	8	8.846	3.91222
bcdGFP/bcdGFP	0.768	-39.4602	4	8	4.451	0.849668
bcdGFP/bcdGFP	0.297167	-88.5174	4	8	4.192	0.425142
bcdGFP/bcdGFP	0.553167	-82.6537	4	8	5.165	0.899383
bcdGFP/bcdGFP	0.953714	-13.1661	4	8	6.59	1.8527
bcdGFP/bcdGFP	0.62	-32.4842	4	8	5.784	1.01477
bcdGFP/bcdGFP	0.9355	18.0877	4	8	9.569	0.521785
bcdGFP/bcdGFP	0.81125	21.8369	4	8	4.847	0.900623
bcdGFP/bcdGFP	0.78	-49.2538	4	8	3.966	0.428981
bcdGFP/bcdGFP	0.394571	-36.1757	4	8	5.886	0.709852
bcdGFP/bcdGFP	0.221375	-46.5814	4	8	5.563	0.461209
bcdGFP/bcdGFP	0.45975	-89.6649	4	8	4.227	0.513009
bcdGFP/bcdGFP	0.3535	-59.7646	4	8	6.215	0.39122
bcdGFP/bcdGFP	0.555667	82.6911	4	8	4.002	0.463768
bcdGFP/bcdGFP	0.71	21.1745	4	8	4.456	0.390355
bcdGFP/bcdGFP	0.749333	-76.565	4	8	3.8	0.624079
bcdGFP/bcdGFP	0.498333	-51.4044	4	8	5.291	0.41839
bcdGFP/bcdGFP	1.716	10.2512	4	8	15.653	1.43287
bcdGFP/bcdGFP	1.109	85.7462	4	8	14.858	0.606671
bcdGFP/bcdGFP	0.7845	-14.7036	4	8	15.581	0.437321
bcdGFP/bcdGFP	1.06488	-12.2279	4	8	10.199	2.31349
bcdGFP/bcdGFP	0.8761	-11.3807	4	8	10.749	2.38183
bcdGFP/bcdGFP	0.866556	52.5167	4	8	9.034	2.12972
bcdGFP/bcdGFP	0.27975	24.6307	4	8	2.627	0.304726
bcdGFP/bcdGFP	0.55175	45.3351	4	8	2.684	0.604587
bcdGFP/bcdGFP	0.464	60.1991	4	8	8.476	0.380291
bcdGFP/bcdGFP	0.440667	-1.75699	4	8	2.077	0.326153
bcdGFP/bcdGFP	0.389375	-52.795	4	8	0.629	0.855015
bcdGFP/bcdGFP	1.57167	-74.1321	4	9	9.32	1.32031
bcdGFP/bcdGFP	1.1884	60.5984	4	9	8.102	1.63568
bcdGFP/bcdGFP	1.1462	6.09195	4	9	7.125	1.55478
bcdGFP/bcdGFP	0.4935	-6.24525	4	9	3.713	0.266582
bcdGFP/bcdGFP	0.36125	-13.332	4	9	3.721	0.394635
bcdGFP/bcdGFP	1.11233	19.9403	4	9	8.328	0.914846
bcdGFP/bcdGFP	0.702667	82.0264	4	9	7.464	0.569506
bcdGFP/bcdGFP	1.1	25.4633	4	9	7.292	0.604745
bcdGFP/bcdGFP	0.487667	-62.7276	4	9	1.232	0.362271
bcdGFP/bcdGFP	0.434	35.1244	4	9	0.04	0.709129
bcdGFP/bcdGFP	0.521867	53.0135	4	9	4.188	2.3586
bcdGFP/bcdGFP	0.41	90	4	9	4.994	0.228
bcdGFP/bcdGFP	0.55575	-35.7259	4	9	5.297	0.530906
bcdGFP/bcdGFP	1.15825	83.5382	4	9	11.259	2.5502
bcdGFP/bcdGFP	0.522714	71.0615	4	9	3.116	1.00754
bcdGFP/bcdGFP	1.06611	51.4567	4	9	4.515	2.53408
bcdGFP/bcdGFP	1.38936	14.3009	5	10	13.114	5.35597
bcdGFP/bcdGFP	1.5095	19.9367	5	10	13.233	0.844618
bcdGFP/bcdGFP	1.1485	41.7386	5	10	13.612	0.633887
bcdGFP/bcdGFP	1.266	-76.9871	5	10	8.09	1.41227
bcdGFP/bcdGFP	0.772	82.9957	5	10	4.205	0.647835
bcdGFP/bcdGFP	1.191	28.2949	5	10	0.414	0.666652
bcdGFP/bcdGFP	0.970167	-26.7411	5	10	4.075	3.20251
bcdGFP/bcdGFP	1.2795	-10.8704	5	10	1.576	0.715845
bcdGFP/bcdGFP	0.362	69.1455	5	10	4.738	0.20225
bcdGFP/bcdGFP	1.16578	68.3958	5	10	0.036	2.85991
bcdGFP/bcdGFP	0.873	-12.0948	5	10	1.736	0.973612
bcdGFP/bcdGFP	0.8056	-86.3269	5	10	2.357	1.10828
bcdGFP/bcdGFP	0.43825	44.1648	5	10	0.968	0.485127
bcdGFP/bcdGFP	0.466	14.2039	5	10	0.913	0.2486
bcdGFP/bcdGFP	1.28625	-7.40886	5	10	1.697	1.75263
bcdGFP/bcdGFP	0.451593	9.93241	5	10	1.143	3.20605
bcdGFP/bcdGFP	1.31725	-33.0972	5	10	4.605	1.47419
bcdGFP/bcdGFP	0.687	77.2288	5	10	3.442	0.384513
bcdGFP/bcdGFP	0.345714	62.183	5	10	1.533	0.593594
bcdGFP/bcdGFP	0.275	-80.3295	5	10	2.231	0.226214
bcdGFP/bcdGFP	0.57075	67.8958	5	10	2.376	0.632487
bcdGFP/bcdGFP	0.30875	-33.5054	5	10	1.206	0.344193
bcdGFP/bcdGFP	0.851333	-61.2351	5	10	5.939	0.710699
bcdGFP/bcdGFP	1.8332	-3.75758	5	10	4.365	2.56351
bcdGFP/bcdGFP	1.143	-21.8184	5	10	6.405	0.626907
bcdGFP/bcdGFP	0.463	15.2163	5	10	1.028	0.259083
bcdGFP/bcdGFP	0.99375	66.5825	5	10	8.842	1.09957
bcdGFP/bcdGFP	1.2452	-9.79173	5	10	3.919	2.08741
bcdGFP/bcdGFP	0.58125	14.4208	5	10	3.521	0.650495
bcdGFP/bcdGFP	0.7345	9.09578	5	10	5.284	0.41117
bcdGFP/bcdGFP	0.503333	16.6992	5	10	1.31	0.386291
bcdGFP/bcdGFP	0.462667	-8.82546	5	10	1.328	0.384553
bcdGFP/bcdGFP	1.0025	-5.63929	5	10	5.915	0.559709
bcdGFP/bcdGFP	0.902	-4.97475	5	10	2.633	0.991736
bcdGFP/bcdGFP	1.1785	-5.6587	5	10	3.179	0.659212
bcdGFP/bcdGFP	0.8315	-28.9349	5	10	3.233	0.465053
bcdGFP/bcdGFP	1.07075	-7.14281	5	10	2.231	1.1983
bcdGFP/bcdGFP	0.900667	12.0466	5	10	9.935	0.74746
bcdGFP/bcdGFP	1.188	14.3014	5	10	2.506	0.995862
bcdGFP/bcdGFP	0.72475	7.07145	5	10	2.654	0.796055
bcdGFP/bcdGFP	0.281333	23.2592	5	10	3.609	0.868593
bcdGFP/bcdGFP	0.4945	-5.81372	5	10	4.608	0.276422
bcdGFP/bcdGFP	0.469667	15.2842	5	10	3.821	0.34521
bcdGFP/bcdGFP	1.63675	-20.0141	5	10	9.903	3.63768
bcdGFP/bcdGFP	0.809333	-48.5913	5	10	6.508	0.677324
bcdGFP/bcdGFP	0.38575	8.08938	5	10	3.326	0.39796
bcdGFP/bcdGFP	0.93925	87.8627	5	10	11.929	1.04573
bcdGFP/bcdGFP	1.29767	-79.474	5	10	2.04	1.08933
bcdGFP/bcdGFP	0.749	-3.59935	5	10	0.453	0.621225
bcdGFP/bcdGFP	0.469	-79.848	5	10	19.069	0.368774
bcdGFP/bcdGFP	0.413333	46.0906	5	10	3.323	0.631561
bcdGFP/bcdGFP	0.448	1.4232	5	10	2.853	0.483149
bcdGFP/bcdGFP	0.3596	-74.3531	5	10	9.567	0.474587
bcdGFP/bcdGFP	0.416429	-5.17493	5	10	1.198	0.798254
bcdGFP/bcdGFP	0.315667	15.323	5	10	2.584	0.518429
bcdGFP/bcdGFP	0.399	84.2072	5	10	2.071	0.208062
bcdGFP/bcdGFP	0.583333	-30.0093	5	10	2.685	0.483865
bcdGFP/bcdGFP	0.604	57.5761	5	10	2.836	0.464397
bcdGFP/bcdGFP	1.259	84.4672	5	10	2.104	0.705286
bcdGFP/bcdGFP	1.562	10.8732	5	10	1.695	0.874703
bcdGFP/bcdGFP	0.739333	-3.45412	5	10	1.358	0.614116
bcdGFP/bcdGFP	1.183	-10.8692	5	10	1.528	0.662892
bcdGFP/bcdGFP	0.453333	-6.20002	5	10	1.883	0.361112
bcdGFP/bcdGFP	1.97533	61.7774	5	10	9.377	1.63883
bcdGFP/bcdGFP	0.9862	53.4571	5	10	4.295	1.33182
bcdGFP/bcdGFP	1.00367	-23.782	5	10	2.573	0.838172
bcdGFP/bcdGFP	1.41667	-21.5232	5	10	3.316	1.18568
bcdGFP/bcdGFP	0.528	59.5345	5	10	3.778	0.295846
bcdGFP/bcdGFP	1.39325	19.7863	5	10	25.29	1.54204
bcdGFP/bcdGFP	0.319333	81.9618	5	10	24.659	0.2646
bcdGFP/bcdGFP	1.3795	-78.7192	5	10	24.17	0.771913
bcdGFP/bcdGFP	1.266	-40.9348	5	10	22.992	0.708181
bcdGFP/bcdGFP	1.4046	50.5106	6	84	17.785	4.5948
bcdGFP/bcdGFP	0.9176	-56.4016	6	84	16.936	2.9474
bcdGFP/bcdGFP	1.101	55.3727	6	84	17.543	1.4413
bcdGFP/bcdGFP	0.501	45	6	84	18.894	1.30673
bcdGFP/bcdGFP	0.9384	9.52999	6	84	19.896	3.06226
bcdGFP/bcdGFP	0.56	-53.427	6	84	27.875	0.73341
bcdGFP/bcdGFP	0.733333	-3.86439	6	84	11.818	1.43927
bcdGFP/bcdGFP	0.5035	-29.3826	6	84	12.689	1.2555
bcdGFP/bcdGFP	0.357	11.8634	6	84	12.273	0.466974
bcdGFP/bcdGFP	0.458333	1.60002	6	84	11.529	0.895349
bcdGFP/bcdGFP	0.5895	-26.9996	6	84	11.232	0.766546
bcdGFP/bcdGFP	0.440667	78.8857	6	84	10.61	0.804081
bcdGFP/bcdGFP	0.351	-51.061	6	84	15.217	0.897385
bcdGFP/bcdGFP	0.5035	-54.0193	6	84	13.542	0.631476
bcdGFP/bcdGFP	0.3625	11.8187	6	84	14.566	0.463833
bcdGFP/bcdGFP	0.3475	26.28	6	84	15.826	0.449455
bcdGFP/bcdGFP	0.514	-6.20815	6	84	3.007	2.63546
bcdGFP/bcdGFP	0.822667	11.777	6	84	5.158	1.61193
bcdGFP/bcdGFP	1.23525	-79.9629	6	84	12.772	3.19591
bcdGFP/bcdGFP	1.02033	-89.9412	6	84	9.343	1.949
bcdGFP/bcdGFP	1.26967	-20.1211	6	84	4.586	2.48251
bcdGFP/bcdGFP	0.788625	15.9818	6	84	0.896	4.10777
bcdGFP/bcdGFP	0.787	70.1215	6	84	4.528	1.02933
bcdGFP/bcdGFP	0.261	-80.0619	6	84	2.332	0.475129
bcdGFP/bcdGFP	2.1006	82.8979	6	84	10.696	6.82638
bcdGFP/bcdGFP	0.6595	-70.8702	6	84	12.509	0.860519
bcdGFP/bcdGFP	1.053	74.3556	6	84	8.373	2.06552
bcdGFP/bcdGFP	0.475333	-48.8373	6	84	10.559	0.929809
bcdGFP/bcdGFP	0.5015	-58.9611	6	84	14.126	0.653582
bcdGFP/bcdGFP	0.898	48.7988	6	84	10.863	1.76103
bcdGFP/bcdGFP	0.373	-11.8161	6	84	13.233	0.488348
bcdGFP/bcdGFP	1.058	7.33519	6	84	3.174	1.38635
bcdGFP/bcdGFP	0.612	89.7549	6	84	7.455	1.16901
bcdGFP/bcdGFP	0.707333	-58.9016	6	84	4.774	1.38623
bcdGFP/bcdGFP	0.954833	-81.9613	6	84	9.21	3.6327
bcdGFP/bcdGFP	1.166	48.0883	6	84	7.253	1.52249
bcdGFP/bcdGFP	0.453	-62.6563	6	84	17.031	0.855599
bcdGFP/bcdGFP	0.855	-89.2028	6	84	13.228	1.65316
bcdGFP/bcdGFP	0.707	-10.1942	6	84	9.072	0.926628
bcdGFP/bcdGFP	0.4645	10.8342	6	84	10.265	0.590526
bcdGFP/bcdGFP	1.09967	4.31653	6	84	12.118	2.13907
bcdGFP/bcdGFP	1.632	-2.5457	6	85	12.454	4.2552
bcdGFP/bcdGFP	0.659667	49.5739	6	85	8.291	1.20592
bcdGFP/bcdGFP	1.11967	40.5586	6	85	13.58	2.18232
bcdGFP/bcdGFP	0.8734	89.1497	6	85	17.685	2.6953
bcdGFP/bcdGFP	0.696286	68.54	6	85	15.222	2.96022
bcdGFP/bcdGFP	0.7965	72.123	6	85	20.424	1.03917
bcdGFP/bcdGFP	0.9502	-55.7081	6	85	19.042	2.98362
bcdGFP/bcdGFP	1.1104	-45.3967	6	85	18.131	3.57451
bcdGFP/bcdGFP	0.8725	-83.8657	6	85	29.811	2.27402
bcdGFP/bcdGFP	0.558	89.7367	6	85	28.726	1.08801
bcdGFP/bcdGFP	1.533	-22.1564	6	85	20.825	1.97806
bcdGFP/bcdGFP	1.63367	-43.8912	6	85	15.728	3.17904
bcdGFP/bcdGFP	1.055	21.1302	6	85	16.091	1.33153
bcdGFP/bcdGFP	0.819	-86.6551	6	85	12.027	2.65653
bcdGFP/bcdGFP	0.9406	-32.3242	6	85	8.416	3.04839
bcdGFP/bcdGFP	0.701	42.5671	6	85	10.577	1.36595
bcdGFP/bcdGFP	0.75175	81.5418	6	85	7.812	1.95122
bcdGFP/bcdGFP	0.803667	61.7763	6	85	6.886	1.56053
bcdGFP/bcdGFP	0.808667	-51.3797	6	85	1.218	1.58454
bcdGFP/bcdGFP	0.686333	-80.0096	6	85	8.748	1.32002
bcdGFP/bcdGFP	1.37057	68.9421	6	85	9.287	6.2397
bcdGFP/bcdGFP	0.8135	-89.6223	6	85	9.843	1.06202
bcdGFP/bcdGFP	1.1215	-83.478	6	85	10.163	1.46146
bcdGFP/bcdGFP	1.17367	19.8993	6	85	7.519	2.27695
bcdGFP/bcdGFP	0.8685	65.4754	6	85	1.373	1.11785
bcdGFP/bcdGFP	1.01	-59.2767	6	85	10.52	1.30752
bcdGFP/bcdGFP	1.16933	-34.8199	6	85	5.11	2.23643
bcdGFP/bcdGFP	0.8	64.843	6	85	11.46	1.0374
bcdGFP/bcdGFP	0.805333	45.0795	6	85	12.364	1.52806
bcdGFP/bcdGFP	0.812	50.0549	6	85	10.237	1.05131
bcdGFP/bcdGFP	0.638	-41.1601	6	85	7.71	0.834137
bcdGFP/bcdGFP	0.497	5.47376	6	85	3.534	0.649964
bcdGFP/bcdGFP	1.605	89.4461	6	85	9.161	3.10315
bcdGFP/bcdGFP	0.738	-32.6673	6	85	13.636	0.96339
bcdGFP/bcdGFP	0.889	-31.5945	6	85	3.702	1.15288
bcdGFP/bcdGFP	0.22875	68.1055	6	85	4.563	0.5712
bcdGFP/bcdGFP	0.567	67.0761	6	85	3.898	0.739395
bcdGFP/bcdGFP	0.3355	27.2095	6	85	5.073	0.437403
bcdGFP/bcdGFP	0.5055	-84.5658	6	85	6.386	1.31993
bcdGFP/bcdGFP	0.225	-88.1524	6	85	9.627	0.434226
bcdGFP/bcdGFP	0.614	-78.5652	6	85	17.65	2.34046
bcdGFP/bcdGFP	0.851667	83.2599	6	85	16.501	1.66148
bcdGFP/bcdGFP	0.7934	-67.4898	6	85	13.524	2.49185
bcdGFP/bcdGFP	0.564	59.4634	6	85	15.091	0.736092
bcdGFP/bcdGFP	0.488	-78.5697	6	85	4.318	0.933515
bcdGFP/bcdGFP	0.715	-42.7094	6	85	12.828	1.37996
bcdGFP/bcdGFP	1.426	-27.8408	6	86	22.908	4.6401
bcdGFP/bcdGFP	1.725	84.3912	6	86	19.079	3.30482
bcdGFP/bcdGFP	1.168	59.822	6	86	20.043	1.52579
bcdGFP/bcdGFP	1.0712	-72.8838	6	86	21.328	3.44874
bcdGFP/bcdGFP	0.493333	-86.8866	6	86	21.295	0.957413
bcdGFP/bcdGFP	0.257	15.0013	6	86	18.927	0.316796
bcdGFP/bcdGFP	0.302	-69.0356	6	86	16.917	0.394088
bcdGFP/bcdGFP	0.5204	-3.12213	6	86	18.375	1.65245
bcdGFP/bcdGFP	1.224	-64.1769	6	86	23.566	5.56023
bcdGFP/bcdGFP	0.312333	-62.9891	6	86	7.145	0.574687
bcdGFP/bcdGFP	0.4925	-66.5085	6	86	9.511	0.642228
bcdGFP/bcdGFP	1.341	19.0867	6	86	4.98	6.11624
bcdGFP/bcdGFP	0.464	-24.6559	6	86	4.898	0.604074
bcdGFP/bcdGFP	0.578	76.6608	6	86	6.565	0.697827
bcdGFP/bcdGFP	1.353	26.9482	6	86	4.651	2.60821
bcdGFP/bcdGFP	0.63	-22.4218	6	86	7.356	0.823236
bcdGFP/bcdGFP	0.813929	-49.5764	6	86	16.512	7.24052
bcdGFP/bcdGFP	0.8545	-23.4555	6	86	14.013	1.11296
bcdGFP/bcdGFP	0.441	-53.8264	6	86	12.866	0.576043
bcdGFP/bcdGFP	0.506	-50.5943	6	86	11.007	0.623811
bcdGFP/bcdGFP	1.022	-62.1907	6	86	11.577	1.99773
bcdGFP/bcdGFP	0.696333	-66.4021	6	86	10.908	1.35643
bcdGFP/bcdGFP	0.629	-40.6624	6	86	8.334	1.62676
bcdGFP/bcdGFP	0.977	-44.4154	6	86	8.413	1.2474
bcdGFP/bcdGFP	0.511857	-14.0722	6	86	2.001	2.31961
bcdGFP/bcdGFP	0.472	70.7188	6	86	6.059	0.920639
bcdGFP/bcdGFP	0.9775	-49.1197	6	86	6.108	2.53942
bcdGFP/bcdGFP	0.577	-59.8277	6	86	6.784	1.86231
bcdGFP/bcdGFP	1.17767	29.9485	6	86	3.994	2.30359
bcdGFP/bcdGFP	1.099	-87.1256	6	86	28.901	1.43581
bcdGFP/bcdGFP	0.5745	30.6628	6	86	28.769	0.751003
bcdGFP/bcdGFP	1.527	-35.9452	6	86	26.98	2.97439
bcdGFP/bcdGFP	0.213667	27.9987	6	86	24.386	0.411118
bcdGFP/bcdGFP	0.404333	51.8817	6	86	21.03	0.743576
bcdGFP/bcdGFP	0.737	-44.5356	6	86	18.138	0.959575
bcdGFP/bcdGFP	0.5305	71.4584	6	86	10.652	0.679258
bcdGFP/bcdGFP	0.438	56.7712	6	86	5.892	1.13689
bcdGFP/bcdGFP	0.913667	83.0761	6	86	8.056	1.62586
bcdGFP/bcdGFP	0.414667	-61.3017	6	86	12.775	0.780929
bcdGFP/bcdGFP	0.439	89.0954	6	86	5.27	0.570071
bcdGFP/bcdGFP	0.323	4.80349	6	86	0.907	0.597097
bcdGFP/bcdGFP	1.33467	-64.0449	6	86	11.081	2.60472
bcdGFP/bcdGFP	1.5405	-74.7424	6	86	17.714	1.99118
bcdGFP/bcdGFP	0.727667	0.609075	6	86	1.762	1.41108
bcdGFP/bcdGFP	1.422	11.1669	6	86	1.75	3.6919
bcdGFP/bcdGFP	0.9125	16.3352	6	86	8.163	1.19108
bcdGFP/bcdGFP	0.6965	74.6785	6	86	14.167	0.908282
bcdGFP/bcdGFP	0.6725	-29.7117	6	86	14.468	0.855468
bcdGFP/bcdGFP	0.6665	-10.5994	6	87	24.215	0.869842
bcdGFP/bcdGFP	0.5765	77.4712	6	87	24.946	0.709905
bcdGFP/bcdGFP	0.465833	86.4899	6	87	24.933	1.78034
bcdGFP/bcdGFP	0.778	-80.4349	6	87	28.063	2.01603
bcdGFP/bcdGFP	1.49933	76.2875	6	87	28.426	2.91921
bcdGFP/bcdGFP	1.1255	81.1608	6	87	26.012	1.45124
bcdGFP/bcdGFP	1.23144	-71.8639	6	87	25.033	7.5785
bcdGFP/bcdGFP	0.603667	-87.2037	6	87	27.405	1.16839
bcdGFP/bcdGFP	1.8475	35.3161	6	87	28.329	2.40448
bcdGFP/bcdGFP	0.321333	-86.6114	6	87	26.061	0.609065
bcdGFP/bcdGFP	0.969333	-16.4093	6	87	25.282	3.76641
bcdGFP/bcdGFP	1.228	-89.6187	6	87	19.593	2.40405
bcdGFP/bcdGFP	1.27033	-85.7166	6	87	15.771	2.47692
bcdGFP/bcdGFP	0.6225	35.1769	6	87	14.933	0.812355
bcdGFP/bcdGFP	0.466	51.1466	6	87	15.45	0.878326
bcdGFP/bcdGFP	0.955	-39.7846	6	87	20.382	2.45037
bcdGFP/bcdGFP	1.17762	63.1703	6	87	12.955	6.09961
bcdGFP/bcdGFP	0.475	-26.3582	6	87	10.069	0.619395
bcdGFP/bcdGFP	0.572	-62.3702	6	87	13.69	0.746081
bcdGFP/bcdGFP	1.10514	60.8804	6	87	5.151	4.96677
bcdGFP/bcdGFP	1.277	-7.99888	6	87	6.655	1.66722
bcdGFP/bcdGFP	1.57367	-80.6422	6	87	9.514	3.06276
bcdGFP/bcdGFP	1.09683	-8.55003	6	87	10.351	4.26439
bcdGFP/bcdGFP	0.618333	-52.6997	6	87	5.691	1.19803
bcdGFP/bcdGFP	0.662571	1.52905	6	87	7.049	2.99807
bcdGFP/bcdGFP	1.1855	-50.7578	6	87	11.158	3.07303
bcdGFP/bcdGFP	1.07633	-76.1023	6	87	7.37	2.10667
bcdGFP/bcdGFP	1.4095	-48.4416	6	87	10.455	1.83755
bcdGFP/bcdGFP	0.7834	-14.3959	6	87	2.396	2.55007
bcdGFP/bcdGFP	1.28033	-2.24754	6	87	5.296	2.49892
bcdGFP/bcdGFP	0.9645	-29.5854	6	87	9.787	1.24767
bcdGFP/bcdGFP	0.704	-84.7998	6	87	5.927	0.893678
bcdGFP/bcdGFP	0.282125	-3.07574	6	87	5.003	1.43507
bcdGFP/bcdGFP	1.57	37.2402	6	87	10.269	2.04244
bcdGFP/bcdGFP	0.632667	88.6064	6	87	5.683	2.34369
bcdGFP/bcdGFP	1.508	-15.2057	6	87	9.643	2.94718
bcdGFP/bcdGFP	1.044	30.5825	6	87	4.158	2.03625
bcdGFP/bcdGFP	1.362	-10.4962	6	87	18.772	2.65137
bcdGFP/bcdGFP	0.9242	75.4457	6	87	14.215	3.00441
bcdGFP/bcdGFP	0.3	76.5798	6	87	12.064	0.383471
bcdGFP/bcdGFP	1.254	-51.6194	6	87	13.677	1.57035
bcdGFP/bcdGFP	0.911	62.009	6	87	7.519	1.77912
bcdGFP/bcdGFP	0.875333	-88.8603	6	87	9.219	1.70934
bcdGFP/bcdGFP	0.432	-19.2577	6	87	17.39	0.836825
bcdGFP/bcdGFP	0.9205	-72.6659	6	87	10.91	1.20157
bcdGFP/bcdGFP	0.6735	58.9911	6	87	5.672	0.871556
bcdGFP/bcdGFP	1.20167	-41.7011	6	87	13.253	2.32245
bcdGFP/bcdGFP	0.21	-53.34	6	87	8.625	0.273002
bcdGFP/bcdGFP	0.163571	-84.7443	6	87	15.1	0.676846
bcdGFP/bcdGFP	1.66557	-0.611353	6	87	13.272	7.59143
bcdGFP/bcdGFP	0.666	-56.6215	6	87	4.779	0.867009
bcdGFP/bcdGFP	0.5555	60.9454	6	87	1.306	0.720694
bcdGFP/bcdGFP	0.3705	46.6797	6	87	12.931	0.482454
bcdGFP/bcdGFP	0.436333	87.899	6	87	6.797	0.845568
bcdGFP/bcdGFP	0.33275	-10.706	6	87	5.847	0.855898
bcdGFP/bcdGFP	0.548	23.1557	6	87	9.952	1.05282
bcdGFP/bcdGFP	0.641	-12.0071	6	87	5.808	0.821984
bcdGFP/bcdGFP	0.2315	-75.4111	6	87	7.511	0.301728
bcdGFP/bcdGFP	1.09325	-54.6888	6	88	30.642	2.82344
bcdGFP/bcdGFP	0.593333	-48.4936	6	88	31.272	1.1604
bcdGFP/bcdGFP	0.82	-70.3821	6	88	15.24	1.07224
bcdGFP/bcdGFP	1.10071	-32.6531	6	88	14.534	4.90408
bcdGFP/bcdGFP	0.3394	-5.01672	6	88	12.86	1.10925
bcdGFP/bcdGFP	0.553	-37.3469	6	88	12.058	0.961033
bcdGFP/bcdGFP	0.569667	-60.9654	6	88	11.06	1.11057
bcdGFP/bcdGFP	0.8695	-46.7098	6	88	13.313	1.13753
bcdGFP/bcdGFP	0.723333	-27.6391	6	88	7.963	1.40763
bcdGFP/bcdGFP	0.5295	44.7657	6	88	8.015	0.691556
bcdGFP/bcdGFP	0.632	-4.26162	6	88	2.902	2.85289
bcdGFP/bcdGFP	0.603	9.02852	6	88	1.204	1.17253
bcdGFP/bcdGFP	1.22625	-58.45	6	88	14.644	3.1343
bcdGFP/bcdGFP	0.8536	1.88935	6	88	11.254	2.69947
bcdGFP/bcdGFP	0.857	0.857657	6	88	8.018	1.67019
bcdGFP/bcdGFP	0.776333	57.7328	6	88	9.927	1.50786
bcdGFP/bcdGFP	0.547667	29.6256	6	88	7.398	1.07216
bcdGFP/bcdGFP	1.0745	-82.6185	6	88	11.245	1.38548
bcdGFP/bcdGFP	0.22125	-10.4842	6	88	12.88	0.571542
bcdGFP/bcdGFP	0.423	-59.0184	6	88	10.878	0.551711
bcdGFP/bcdGFP	0.341	42.6267	6	88	10.255	0.665959
bcdGFP/bcdGFP	0.745	5.00284	6	88	8.157	0.974713
bcdGFP/bcdGFP	1.28033	-2.86012	6	88	1.435	2.50512
bcdGFP/bcdGFP	0.277143	23.0533	6	88	20.921	1.13896
bcdGFP/bcdGFP	1.11267	75.912	6	88	21.716	2.14862
bcdGFP/bcdGFP	0.589667	52.9207	6	88	12.142	1.14941
bcdGFP/bcdGFP	0.448	-63.1711	6	88	6.332	0.582725
bcdGFP/bcdGFP	1.607	2.76933	6	88	11.969	2.09044
bcdGFP/bcdGFP	0.635	-23.3565	6	88	6.101	1.23849
bcdGFP/bcdGFP	0.201889	-3.10166	6	88	13.105	0.813191
bcdGFP/bcdGFP	0.418	-79.3092	6	88	10.484	0.54445
bcdGFP/bcdGFP	1.24533	-19.5223	6	88	19.378	2.43286
bcdGFP/bcdGFP	0.636667	-43.436	6	89	17.704	1.24356
bcdGFP/bcdGFP	0.3545	-42.8983	6	89	17.964	0.462759
bcdGFP/bcdGFP	1.50786	65.9757	6	89	15.881	6.87014
bcdGFP/bcdGFP	0.352833	-68.5033	6	89	10.044	1.36172
bcdGFP/bcdGFP	0.5905	-13.3512	6	89	13.431	0.770833
bcdGFP/bcdGFP	1.27867	87.5911	6	89	3.685	2.49821
bcdGFP/bcdGFP	0.510333	49.9503	6	89	1.776	0.991527
bcdGFP/bcdGFP	0.37	12.3005	6	89	27.797	0.680625
bcdGFP/bcdGFP	0.377429	68.7405	6	89	26.885	1.64923
bcdGFP/bcdGFP	0.9355	80.1503	6	89	26.005	2.43185
bcdGFP/bcdGFP	0.39825	-44.9386	6	89	22.4	1.97919
bcdGFP/bcdGFP	0.5365	-11.1605	6	89	21.004	0.676799
bcdGFP/bcdGFP	0.3115	-42.3383	6	89	17.48	0.715657
bcdGFP/bcdGFP	0.247	45.8598	6	89	26.311	1.03674
bcdGFP/bcdGFP	0.8574	-43.1212	6	89	9.664	2.76061
bcdGFP/bcdGFP	0.436333	-7.80747	6	89	4.303	0.853916
bcdGFP/bcdGFP	0.304	-13.3873	6	89	4.303	0.513966
bcdGFP/bcdGFP	0.803333	-41.0054	6	89	8.841	1.52256
bcdGFP/bcdGFP	0.847	47.0278	6	89	4.59	1.63869
bcdGFP/bcdGFP	0.7795	-26.4629	6	89	14.041	1.0031
bcdGFP/bcdGFP	0.616667	-0.143718	6	89	8.753	2.39201
bcdGFP/bcdGFP	0.73075	-63.1374	6	89	8.293	1.89442
bcdGFP/bcdGFP	0.452	-28.5792	6	89	10.391	0.877976
bcdGFP/bcdGFP	0.534	30.2261	6	89	9.676	1.35872
bcdGFP/bcdGFP	1.096	10.2583	6	89	10.186	1.43189
bcdGFP/bcdGFP	1.326	-12.7401	6	89	13.224	3.44173
bcdGFP/bcdGFP	0.473667	0	6	89	9.009	0.924
bcdGFP/bcdGFP	0.7185	86.8374	6	89	10	1.84882
bcdGFP/bcdGFP	0.383	85.5835	6	89	9.723	0.493465
bcdGFP/bcdGFP	0.365333	-81.6763	6	89	10.499	0.711495
bcdGFP/bcdGFP	1.103	80.1597	6	89	5.749	2.11816
bcdGFP/bcdGFP	0.583333	36.0047	6	89	3.223	1.11253
bcdGFP/bcdGFP	1.03733	-48.0736	6	89	9.09	2.0309
bcdGFP/bcdGFP	0.8075	3.90923	6	89	12.718	1.04142
bcdGFP/bcdGFP	0.684	87.4466	6	89	10.974	1.32431
bcdGFP/bcdGFP	0.4355	5.0395	6	89	3.429	0.5692
bcdGFP/bcdGFP	0.768667	-8.13549	6	89	2.439	1.50515
bcdGFP/bcdGFP	0.30675	41.5476	6	89	15.736	0.774981
bcdGFP/bcdGFP	0.74775	87.0462	6	89	20.372	1.94058
bcdGFP/bcdGFP	0.819333	15.4889	6	89	13.625	1.56898
bcdGFP/bcdGFP	1.14467	-5.05974	6	89	12.769	2.2337
bcdGFP/bcdGFP	0.899	-8.98025	6	89	9.669	1.17237
bcdGFP/bcdGFP	0.911571	-18.9568	6	90	14.173	3.99254
bcdGFP/bcdGFP	0.9255	-35.5687	6	90	12.99	2.36041
bcdGFP/bcdGFP	1.25567	87.6451	6	90	11.558	2.45808
bcdGFP/bcdGFP	0.788333	-2.41898	6	90	9.385	1.51635
bcdGFP/bcdGFP	0.45725	38.9729	6	90	12.98	1.17179
bcdGFP/bcdGFP	0.609	-28.4465	6	90	15.998	1.17144
bcdGFP/bcdGFP	0.7265	7.76244	6	90	11.782	0.947684
bcdGFP/bcdGFP	0.537429	19.9809	6	90	10.934	2.23876
bcdGFP/bcdGFP	0.624	-31.5767	6	90	12.694	1.2184
bcdGFP/bcdGFP	0.360429	-35.7539	6	90	11.816	1.6019
bcdGFP/bcdGFP	0.732667	-60.1358	6	90	13.461	1.42988
bcdGFP/bcdGFP	0.329	56.0208	6	90	12.104	0.384689
bcdGFP/bcdGFP	0.66775	65.0715	6	90	14.633	1.72247
bcdGFP/bcdGFP	0.3135	88.5925	6	90	11.035	0.407123
bcdGFP/bcdGFP	0.761333	50.7537	6	90	8.384	1.40361
bcdGFP/bcdGFP	0.5455	75.9442	6	90	13.625	0.712327
bcdGFP/bcdGFP	0.255667	84.6991	6	90	17.898	0.487083
bcdGFP/bcdGFP	0.355	39.7896	6	90	15.299	0.918793
bcdGFP/bcdGFP	0.6255	44.7993	6	90	15.875	0.807521
bcdGFP/bcdGFP	0.293	-87.1027	6	90	11.026	0.573733
bcdGFP/bcdGFP	0.626	-7.58747	6	90	10.234	1.58286
bcdGFP/bcdGFP	1.1645	0.60789	6	90	3.957	1.50808
bcdGFP/bcdGFP	1.006	-26.9408	6	90	2.992	1.29561
bcdGFP/bcdGFP	1.278	76.2315	6	90	6.688	2.4916
bcdGFP/bcdGFP	1.2145	-87.6877	6	90	7.946	1.58629
bcdGFP/bcdGFP	0.412	83.3792	6	90	1.485	0.789264
bcdGFP/bcdGFP	1.03467	-65.0842	6	90	2.964	2.02001
bcdGFP/bcdGFP	0.4105	60.2264	6	90	11.914	0.99079
bcdGFP/bcdGFP	0.331333	5.29821	6	90	11.887	0.649776
bcdGFP/bcdGFP	0.817	-15.938	6	90	4.525	2.13403
bcdGFP/bcdGFP	0.6	24.6587	6	90	2.449	1.54598
bcdGFP/bcdGFP	1.0045	89.2981	6	90	13.742	1.3061
bcdGFP/bcdGFP	0.291	87.6853	6	91	21.159	0.569465
bcdGFP/bcdGFP	0.7085	-69.2277	6	91	21.607	0.899468
bcdGFP/bcdGFP	0.617167	70.825	6	91	10.158	2.37475
bcdGFP/bcdGFP	1.19833	54.2166	6	91	11.918	2.33102
bcdGFP/bcdGFP	0.590333	-69.9402	6	91	7.737	1.14868
bcdGFP/bcdGFP	0.537833	41.6094	6	91	7.244	1.97275
bcdGFP/bcdGFP	0.3865	-41.3785	6	91	5.569	0.503759
bcdGFP/bcdGFP	1.17225	18.1671	6	91	4.319	3.04373
bcdGFP/bcdGFP	0.9608	7.52762	6	91	10.446	3.10677
bcdGFP/bcdGFP	0.876	-69.7031	6	91	11.602	1.1387
bcdGFP/bcdGFP	0.4495	-7.87394	6	91	9.958	0.569368
bcdGFP/bcdGFP	0.831	-27.7403	6	91	13.378	1.61344
bcdGFP/bcdGFP	0.419125	-37.9302	6	91	9.518	2.18317
bcdGFP/bcdGFP	0.553	-87.5327	6	91	13.228	1.78866
bcdGFP/bcdGFP	0.529	76.6733	6	91	11.509	0.685458
bcdGFP/bcdGFP	0.8172	-36.2423	6	91	8.881	2.66576
bcdGFP/bcdGFP	0.397333	-5.06643	6	91	5.572	0.770008
bcdGFP/bcdGFP	0.885	20.908	6	91	5.284	1.14328
bcdGFP/bcdGFP	0.988333	-37.6652	6	91	6.759	1.91638
bcdGFP/bcdGFP	0.5735	-78.6901	6	91	7.691	0.718962
bcdGFP/bcdGFP	0.905	32.3094	6	91	4.154	1.7381
bcdGFP/bcdGFP	0.8515	12.073	6	91	2.798	1.10443
bcdGFP/bcdGFP	0.5825	15.935	6	91	2.393	0.753972
bcdGFP/bcdGFP	1.024	16.2808	6	91	7.464	1.33764
bcdGFP/bcdGFP	0.638	-2.51995	6	91	4.888	0.818792
bcdGFP/bcdGFP	0.53125	-78.0637	6	91	13.076	1.36348
bcdGFP/bcdGFP	0.543	9.46232	6	91	10.464	0.7056
bcdGFP/bcdGFP	0.818333	-32.2677	6	91	5.718	1.59775
bcdGFP/bcdGFP	1.12743	-5.44945	6	92	5.86	5.06489
bcdGFP/bcdGFP	0.6885	-64.9598	6	92	3.54	0.890718
bcdGFP/bcdGFP	0.578	41.243	6	92	2.729	0.755399
bcdGFP/bcdGFP	0.621333	8.5448	6	92	2.907	1.21145
bcdGFP/bcdGFP	0.265	-7.59464	6	92	19.051	0.499381
bcdGFP/bcdGFP	0.5	-33.1971	6	92	12.17	1.28945
bcdGFP/bcdGFP	0.965	-66.8134	6	92	8.518	1.88963
bcdGFP/bcdGFP	0.683	-46.2013	6	92	3.039	2.15856
bcdGFP/bcdGFP	0.779167	10.4662	7	99	1.954	3.04974
bcdGFP/bcdGFP	0.9105	-41.2355	7	99	4.886	1.19547
bcdGFP/bcdGFP	0.4695	-63.9372	7	99	7.823	0.612259
bcdGFP/bcdGFP	0.291	-41.5395	7	99	10.727	1.2652
bcdGFP/bcdGFP	0.5115	-49.366	7	99	9.941	1.32827
bcdGFP/bcdGFP	0.2168	17.3949	7	99	11.8	1.25437
bcdGFP/bcdGFP	0.2364	-76.4346	7	99	12.493	0.767409
bcdGFP/bcdGFP	0.280667	-34.362	7	99	11.891	0.543921
bcdGFP/bcdGFP	1.19075	-37.7768	7	99	14.319	3.12119
bcdGFP/bcdGFP	1.317	74.934	7	99	8.554	1.72738
bcdGFP/bcdGFP	1.1885	15.8142	7	99	13.395	3.11905
bcdGFP/bcdGFP	1.448	-49.0652	7	99	12.295	2.83273
bcdGFP/bcdGFP	0.3472	-73.9817	7	99	10.389	1.07993
bcdGFP/bcdGFP	0.973	-73.1286	7	99	11.907	1.91231
bcdGFP/bcdGFP	1.02067	-74.4193	7	99	12.202	2.00674
bcdGFP/bcdGFP	1.2765	55.9345	7	99	9.824	3.3438
bcdGFP/bcdGFP	0.970143	-77.5784	7	99	11.372	4.40717
bcdGFP/bcdGFP	0.5815	48.9835	7	99	0.576	0.763398
bcdGFP/bcdGFP	0.500333	44.7904	7	99	0.898	0.966621
bcdGFP/bcdGFP	0.352333	-44.8816	7	99	1.691	0.684481
bcdGFP/bcdGFP	0.40475	35.5439	7	99	0.92	1.06308
bcdGFP/bcdGFP	0.632143	-29.8639	7	99	4.021	2.98428
bcdGFP/bcdGFP	0.4995	-15.9031	7	99	9.513	1.30287
bcdGFP/bcdGFP	0.496667	-46.2915	7	99	4.576	0.972519
bcdGFP/bcdGFP	0.858	26.5765	7	99	2.702	2.24635
bcdGFP/bcdGFP	0.887	-14.9206	7	99	6.02	1.71275
bcdGFP/bcdGFP	0.498667	-22.7283	7	99	9.939	0.975771
bcdGFP/bcdGFP	0.474667	23.729	7	99	9.543	0.921942
bcdGFP/bcdGFP	1.21033	-23.7247	7	99	23.458	2.3736
bcdGFP/bcdGFP	0.796	85.8164	7	99	18.164	1.04178
bcdGFP/bcdGFP	0.766333	69.6358	7	99	10.451	1.50293
bcdGFP/bcdGFP	0.4615	-60.8074	7	99	10.036	0.604821
bcdGFP/bcdGFP	0.7805	57.0115	7	99	8.354	1.01934
bcdGFP/bcdGFP	0.6772	54.0542	7	99	4.11	2.21969
bcdGFP/bcdGFP	0.859667	-42.6474	7	99	7.188	1.67089
bcdGFP/bcdGFP	1.015	6.20717	7	99	4.881	1.33181
bcdGFP/bcdGFP	0.787667	25.3624	7	99	4.291	1.51281
bcdGFP/bcdGFP	1.3925	-70.2379	7	100	3.725	1.81595
bcdGFP/bcdGFP	1.04233	31.2009	7	100	12.523	2.03073
bcdGFP/bcdGFP	0.28575	68.3716	7	100	7.619	0.737957
bcdGFP/bcdGFP	0.5845	9.19316	7	100	7.206	0.769889
bcdGFP/bcdGFP	1.1575	-31.0804	7	100	2.846	1.51674
bcdGFP/bcdGFP	0.833	-21.5	7	100	1.232	1.09413
bcdGFP/bcdGFP	0.6105	-6.10278	7	100	7.301	0.799531
bcdGFP/bcdGFP	0.544	-20.7644	7	100	4.387	0.707987
bcdGFP/bcdGFP	1.2025	65.3606	7	100	0.279	3.15419
bcdGFP/bcdGFP	0.595	-11.6015	7	100	0.966	0.770746
bcdGFP/bcdGFP	0.519	-14.959	7	100	2.235	1.34043
bcdGFP/bcdGFP	0.5618	-21.5578	7	100	9.798	1.83432
bcdGFP/bcdGFP	0.723333	-80.1377	7	100	10.003	1.41288
bcdGFP/bcdGFP	1.136	23.7983	7	100	12.972	2.23286
bcdGFP/bcdGFP	1.144	0.190477	7	100	13.683	1.50401
bcdGFP/bcdGFP	0.791	-5.25804	7	100	3.206	1.54952
bcdGFP/bcdGFP	0.3745	16.6421	7	100	2.986	0.960221
bcdGFP/bcdGFP	0.467	84.7755	7	100	0.084	1.20802
bcdGFP/bcdGFP	0.986	68.4081	7	100	12.69	1.92939
bcdGFP/bcdGFP	0.7735	-55.0228	7	100	22.684	0.950719
bcdGFP/bcdGFP	0.774	-1.46447	7	100	8.263	1.01733
bcdGFP/bcdGFP	1.7605	24.9361	7	100	4.097	2.31258
bcdGFP/bcdGFP	0.5712	9.48778	7	100	0.811	1.85031
bcdGFP/bcdGFP	0.889	-11.059	7	100	1.279	1.74643
bcdGFP/bcdGFP	0.502	-88.0908	7	100	9.521	0.99055
bcdGFP/bcdGFP	0.541333	-40.802	7	100	7.76	1.05288
bcdGFP/bcdGFP	0.24825	85.0405	7	100	9.346	1.21455
bcdGFP/bcdGFP	0.5355	63.2868	7	100	8.922	0.691842
bcdGFP/bcdGFP	1.349	88.6438	7	100	3.527	2.66175
bcdGFP/bcdGFP	0.687333	17.4021	7	100	3.721	1.35083
bcdGFP/bcdGFP	0.490333	10.0674	7	100	17.737	0.949622
bcdGFP/bcdGFP	0.549	-75.0737	7	100	6.638	0.718235
bcdGFP/bcdGFP	0.479	31.8994	7	100	1.301	0.63017
bcdGFP/bcdGFP	0.429	-13.44	7	100	1.334	0.559317
bcdGFP/bcdGFP	0.495	-62.0965	7	100	5.055	0.957298
bcdGFP/bcdGFP	0.628	-19.6865	7	100	3.511	0.825235
bcdGFP/bcdGFP	0.886667	-5.42012	7	102	7.431	1.74681
bcdGFP/bcdGFP	0.799	-12.8636	7	102	1.46	2.09764
bcdGFP/bcdGFP	1.2098	-7.74961	7	102	2.021	3.98237
bcdGFP/bcdGFP	0.573	62.6738	7	102	6.341	1.11098
bcdGFP/bcdGFP	0.3148	-11.6818	7	102	0.396	1.02728
bcdGFP/bcdGFP	1.2795	75.7004	7	102	7.092	1.68831
bcdGFP/bcdGFP	0.659	68.7632	7	102	17.701	0.866868
bcdGFP/bcdGFP	1.40267	-59.0327	7	102	15.433	2.76164
bcdGFP/bcdGFP	1.9535	-52.6279	7	102	10.629	2.5783
bcdGFP/bcdGFP	1.048	-43.7361	7	102	8.429	1.37849
bcdGFP/bcdGFP	1.135	-48.5798	7	102	14.671	1.44957
bcdGFP/bcdGFP	1.26733	-79.7258	7	102	11.551	2.50619
bcdGFP/bcdGFP	1.9965	3.5682	7	102	5.943	2.63511
bcdGFP/bcdGFP	1.0205	-61.6182	7	102	7.723	1.34008
bcdGFP/bcdGFP	0.686	19.8281	7	102	7.478	0.884434
bcdGFP/bcdGFP	0.5805	-38.0983	7	102	5.38	0.764976
bcdGFP/bcdGFP	1.4625	-48.5593	7	102	7.394	1.92492
bcdGFP/bcdGFP	0.5275	59.0149	7	102	3.494	1.38108
bcdGFP/bcdGFP	0.6465	-47.9527	7	102	3.637	0.851072
bcdGFP/bcdGFP	1.2195	80.6139	7	102	16.007	1.60651
bcdGFP/bcdGFP	1.13067	-70.6551	7	102	4.343	2.17054
bcdGFP/bcdGFP	0.468333	-38.9405	7	102	3.473	0.924404
bcdGFP/bcdGFP	0.813	57.955	7	102	1.46	1.0724
bcdGFP/bcdGFP	0.6005	88.9025	7	102	8.18	0.783144
bcdGFP/bcdGFP	0.51475	-1.23518	7	102	4.948	1.34531
bcdGFP/bcdGFP	1.2255	41.7252	7	102	3.784	1.60917
bcdGFP/bcdGFP	0.255667	-6.2773	7	102	3.018	0.503016
bcdGFP/bcdGFP	0.4775	45.0643	7	102	3.825	0.630033
bcdGFP/bcdGFP	0.59675	-66.113	7	103	15.344	1.54099
bcdGFP/bcdGFP	0.375818	-26.622	7	103	15.343	2.69804
bcdGFP/bcdGFP	0.80725	-19.8313	7	103	16.542	2.06337
bcdGFP/bcdGFP	0.494	-19.113	7	103	15.829	0.641355
bcdGFP/bcdGFP	0.2442	-39.9909	7	103	14.171	0.712657
bcdGFP/bcdGFP	1.0245	-15.1729	7	103	13.339	1.34488
bcdGFP/bcdGFP	0.715	-32.5253	7	103	12.795	1.86917
bcdGFP/bcdGFP	0.771	-20.2518	7	103	16.403	3.46096
bcdGFP/bcdGFP	1.51625	-46.7979	7	103	7.953	3.94406
bcdGFP/bcdGFP	1.1445	-2.79363	7	103	5.194	1.49778
bcdGFP/bcdGFP	0.78	19.3236	7	103	4.985	1.52915
bcdGFP/bcdGFP	0.831	-15.6564	7	103	9.807	1.08942
bcdGFP/bcdGFP	0.396	-49.8546	7	103	8.923	0.777069
bcdGFP/bcdGFP	0.726286	-18.6334	7	103	7.288	3.28626
bcdGFP/bcdGFP	1.461	-11.0989	7	103	5.112	1.91685
bcdGFP/bcdGFP	1.137	8.28839	7	103	4.471	1.48451
bcdGFP/bcdGFP	0.5012	-60.8787	7	103	1.934	1.58427
bcdGFP/bcdGFP	0.799333	7.23404	7	103	1.393	1.56445
bcdGFP/bcdGFP	1.09	3.3358	7	103	3.01	1.42642
bcdGFP/bcdGFP	0.957667	-16.2967	7	103	8.146	1.8816
bcdGFP/bcdGFP	1.30767	-18.1884	7	103	11.281	2.57254
bcdGFP/bcdGFP	1.3555	54.0272	7	103	13.076	1.77562
bcdGFP/bcdGFP	1.12967	-76.1472	7	103	11.854	2.1969
bcdGFP/bcdGFP	0.451	-13.8462	7	103	6.177	0.584999
bcdGFP/bcdGFP	0.4195	-25.7726	7	103	2.677	0.549678
bcdGFP/bcdGFP	0.821333	-13.0992	7	103	1.661	1.60168
bcdGFP/bcdGFP	0.473	24.9358	7	104	10.356	0.597719
bcdGFP/bcdGFP	0.791923	23.9694	7	104	12.594	6.72494
bcdGFP/bcdGFP	0.406333	-5.25957	7	104	15.502	0.796353
bcdGFP/bcdGFP	0.527	-18.6978	7	104	12.687	0.689384
bcdGFP/bcdGFP	0.948333	2.91136	7	104	9.541	1.87041
bcdGFP/bcdGFP	0.649	-67.3437	7	104	15.287	0.846308
bcdGFP/bcdGFP	1.083	-3.93962	7	104	20.674	2.12502
bcdGFP/bcdGFP	0.704	13.0039	7	104	1.585	1.38656
bcdGFP/bcdGFP	0.508667	-12.5664	7	104	0.854	0.992782
bcdGFP/bcdGFP	1.515	-42.0795	7	104	4.677	1.9846
bcdGFP/bcdGFP	0.465667	-5.0644	7	104	3.154	0.917582
bcdGFP/bcdGFP	0.587	-28.9967	7	104	-0.595	1.53891
bcdGFP/bcdGFP	0.706857	33.6408	7	104	2.812	3.22752
bcdGFP/bcdGFP	0.36725	27.6309	7	104	3.093	0.961676
bcdGFP/bcdGFP	0.854833	-38.8802	7	104	4.835	3.32965
bcdGFP/bcdGFP	0.639	45.0483	7	104	0.116	0.839336
bcdGFP/bcdGFP	1.515	-75.8656	7	104	8.18	1.982
bcdGFP/bcdGFP	0.4535	-6.79133	7	104	1.699	1.15007
bcdGFP/bcdGFP	1.466	-7.23223	7	104	4.378	3.84459
bcdGFP/bcdGFP	1.44333	-10.2048	7	104	4.323	2.76575
bcdGFP/bcdGFP	1.22067	34.8866	7	104	0.244	2.40404
bcdGFP/bcdGFP	0.441167	42.7366	7	104	0.795	1.66512
bcdGFP/bcdGFP	0.345	14.2833	7	104	2.02	0.899816
bcdGFP/bcdGFP	0.611333	-9.14708	7	104	2.763	1.1952
bcdGFP/bcdGFP	0.9345	5.49143	7	104	7.097	1.22261
bcdGFP/bcdGFP	0.74175	67.7179	7	104	2.014	2.25758
bcdGFP/bcdGFP	0.9528	32.0676	7	104	2.6	3.12477
bcdGFP/bcdGFP	0.400333	-51.3174	7	104	0.978	0.783992
bcdGFP/bcdGFP	0.46775	21.1713	7	104	0.766	1.19892
bcdGFP/bcdGFP	0.22775	17.5038	7	104	2.756	0.661636
bcdGFP/bcdGFP	0.708	6.1155	7	104	2.578	0.929288
bcdGFP/bcdGFP	0.5035	-69.1495	7	104	5.448	1.27553
bcdGFP/bcdGFP	1.4305	21.9824	7	104	24.083	1.88073
bcdGFP/bcdGFP	0.517333	87.7922	8	106	9.554	2.98522
bcdGFP/bcdGFP	0.96025	86.1498	8	106	12.056	2.53171
bcdGFP/bcdGFP	0.298	-34.7981	8	106	9.605	0.387253
bcdGFP/bcdGFP	0.1805	-2.67997	8	106	16.679	0.470515
bcdGFP/bcdGFP	1.6514	27.8791	8	106	5.092	5.40197
bcdGFP/bcdGFP	1.2947	83.4524	8	106	3.688	8.41891
bcdGFP/bcdGFP	1.23875	9.13764	8	106	12.068	3.24923
bcdGFP/bcdGFP	1.45925	6.52828	8	106	2.123	3.83487
bcdGFP/bcdGFP	0.4256	-19.8628	8	106	3.224	1.38329
bcdGFP/bcdGFP	0.763	-36.8775	8	106	2.22	1.5014
bcdGFP/bcdGFP	0.955667	5.98965	8	106	0.156	1.85915
bcdGFP/bcdGFP	1.229	2.41774	8	106	2.205	6.37668
bcdGFP/bcdGFP	0.308429	-18.4349	8	106	3.446	1.4167
bcdGFP/bcdGFP	0.384	14.7697	8	106	3.594	1.00418
bcdGFP/bcdGFP	0.568667	17.7447	8	106	3.139	1.10245
bcdGFP/bcdGFP	0.5165	25.7693	8	106	1.508	1.3525
bcdGFP/bcdGFP	0.813	-87.2263	8	106	21.007	2.12849
bcdGFP/bcdGFP	1.02625	21.9165	8	106	12.668	2.68182
bcdGFP/bcdGFP	1.0835	-23.2777	8	106	7.275	1.42717
bcdGFP/bcdGFP	0.495	-5.3695	8	106	4.043	0.65186
bcdGFP/bcdGFP	0.566667	-75.7516	8	106	2.908	1.11325
bcdGFP/bcdGFP	0.307333	-16.5178	8	106	1.989	0.604966
bcdGFP/bcdGFP	0.619667	-23.9577	8	106	0.782	1.20918
bcdGFP/bcdGFP	1.43225	-12.7833	8	106	2.769	3.7602
bcdGFP/bcdGFP	1.71186	-49.0213	8	106	10.595	7.85479
bcdGFP/bcdGFP	0.509	81.6538	8	107	1.197	1.94965
bcdGFP/bcdGFP	0.344667	-22.5416	8	107	5.217	0.675616
bcdGFP/bcdGFP	0.709667	-33.644	8	107	3.828	1.37899
bcdGFP/bcdGFP	1.0175	52.6796	8	107	1.185	1.32284
bcdGFP/bcdGFP	0.568	51.001	8	107	3.529	1.05513
bcdGFP/bcdGFP	0.6405	-68.4608	8	107	6.908	0.811683
bcdGFP/bcdGFP	1.259	-6.88053	8	107	5.86	2.47079
bcdGFP/bcdGFP	1.333	-40.4966	8	107	16.801	2.61163
bcdGFP/bcdGFP	0.54	-87.5245	8	107	12.35	1.06499
bcdGFP/bcdGFP	0.720333	29.2844	8	107	11.302	1.40449
bcdGFP/bcdGFP	0.7305	19.8864	8	107	3.612	0.961325
bcdGFP/bcdGFP	1.08875	-5.31875	8	107	2.172	2.83722
bcdGFP/bcdGFP	1.28633	67.4395	8	107	2.063	2.52308
bcdGFP/bcdGFP	0.7715	-6.05334	8	107	6.633	1.01466
bcdGFP/bcdGFP	0.528	-51.7464	8	107	4.119	1.0353
bcdGFP/bcdGFP	1.252	71.0138	8	107	11.175	2.46511
bcdGFP/bcdGFP	0.885	36.2868	8	107	7.442	1.12026
bcdGFP/bcdGFP	0.931	-4.44894	8	107	0.46	1.22469
bcdGFP/bcdGFP	1.20067	-0.195049	8	107	0.911	2.35001
bcdGFP/bcdGFP	1.279	-9.57989	8	107	5.899	1.68246
bcdGFP/bcdGFP	1.16925	20.2465	8	108	4.577	3.01104
bcdGFP/bcdGFP	1.2255	-10.5824	8	108	2.058	1.60632
bcdGFP/bcdGFP	0.57025	-18.582	8	108	2.678	1.47805
bcdGFP/bcdGFP	1.17667	10.1543	8	108	2.207	2.24618
bcdGFP/bcdGFP	0.5185	-18.4884	8	108	6.13	0.677993
bcdGFP/bcdGFP	0.904	-39.7871	8	108	13.481	1.19074
bcdGFP/bcdGFP	0.55	-54.6291	8	108	3.454	1.07797
bcdGFP/bcdGFP	0.654	-61.427	8	108	5.746	0.85515
bcdGFP/bcdGFP	0.6155	40.3321	8	108	3.038	0.808075
bcdGFP/bcdGFP	0.734333	2.03544	8	108	8.5	1.43591
bcdGFP/bcdGFP	0.672	76.7175	8	108	9.006	1.32751
bcdGFP/bcdGFP	0.572	31.2243	8	108	3.418	0.754259
bcdGFP/bcdGFP	0.516	22.756	8	108	0.429	0.679925
bcdGFP/bcdGFP	0.310333	-36.7155	8	109	8.071	0.593802
bcdGFP/bcdGFP	0.204375	22.6861	8	109	4.201	0.998231
bcdGFP/bcdGFP	1.46575	-41.8178	8	109	13.409	3.84694
bcdGFP/bcdGFP	0.944333	-16.9095	8	109	5.115	1.85312
bcdGFP/bcdGFP	1.946	89.1193	8	109	5.085	2.5373
bcdGFP/bcdGFP	0.586	37.6848	8	109	3.059	1.53276
bcdGFP/bcdGFP	0.48575	-88.8469	8	109	3.697	1.24225
bcdGFP/bcdGFP	1.03933	80.0001	8	109	3.167	2.05015
bcdGFP/bcdGFP	1.0642	88.8359	8	109	5.668	3.49472
bcdGFP/bcdGFP	1.558	-82.2348	8	109	2.797	2.02053
bcdGFP/bcdGFP	0.709	75.1536	8	109	1.371	1.38938
bcdGFP/bcdGFP	1.117	18.8559	8	109	6.113	1.46354
bcdGFP/bcdGFP	0.4195	77.6864	8	109	4.017	0.548621
bcdGFP/bcdGFP	0.872	41.6627	8	109	0.273	1.14179
bcdGFP/bcdGFP	1.0745	-38.317	8	109	9.317	1.40965
bcdGFP/bcdGFP	0.3095	79.3098	8	109	0.761	0.398924
bcdGFP/bcdGFP	0.7945	-18.0016	8	109	1.338	1.04516
bcdGFP/bcdGFP	1.6205	9.85545	8	109	2.561	2.13247
bcdGFP/bcdGFP	1.389	3.65624	9	114	2.479	2.72855
bcdGFP/bcdGFP	1.505	-17.8637	9	114	1.117	1.99834
bcdGFP/bcdGFP	0.7965	21.2477	9	114	3.558	1.05684
bcdGFP/bcdGFP	0.97475	19.236	9	114	2.364	5.15691
bcdGFP/bcdGFP	0.899333	12.5253	9	114	3.906	1.78447
bcdGFP/bcdGFP	0.644667	37.6862	9	114	4.22	1.27753
bcdGFP/bcdGFP	0.7095	-69.0823	9	114	5.408	0.927101
bcdGFP/bcdGFP	0.35125	81.9047	9	114	4.406	0.93027
bcdGFP/bcdGFP	0.604	-86.281	9	114	5.294	0.801688
bcdGFP/bcdGFP	0.573667	-80.8012	9	114	9.768	2.25196
bcdGFP/bcdGFP	0.99575	-20.2056	9	114	11.277	2.6405
bcdGFP/bcdGFP	0.475667	42.8948	9	114	5.106	0.94321
bcdGFP/bcdGFP	1.0065	-89.0566	9	114	2.55	1.33618
bcdGFP/bcdGFP	0.337333	-55.5225	9	114	11.645	0.66598
bcdGFP/bcdGFP	0.3026	8.77698	9	114	4.123	0.989588
bcdGFP/bcdGFP	0.27275	64.0637	9	114	0.391	0.692776
bcdGFP/bcdGFP	1.1065	29.5173	9	115	0.314	1.46747
bcdGFP/bcdGFP	0.467	29.8486	9	115	0.531	0.616826
bcdGFP/bcdGFP	0.302	42.5518	9	115	0.931	0.595928
bcdGFP/bcdGFP	0.332667	-25.0169	9	115	1.38	0.645565
bcdGFP/bcdGFP	0.393333	19.8954	9	115	1.168	0.781653
bcdGFP/bcdGFP	0.52	13.9958	9	115	1.601	1.02956
bcdGFP/bcdGFP	0.53125	9.72875	9	115	1.864	1.37883
bcdGFP/bcdGFP	0.837	42.0416	9	115	3.727	1.09606
bcdGFP/bcdGFP	0.783667	-9.80879	9	115	6.056	1.54965
bcdGFP/bcdGFP	0.654	-21.6043	9	115	4.679	0.863674
bcdGFP/bcdGFP	0.9965	46.994	9	115	1.189	1.32097
bcdGFP/bcdGFP	1.03	88.8514	9	115	3.24	2.04541
bcdGFP/bcdGFP	0.677	34.465	9	115	3.956	0.881777
bcdGFP/bcdGFP	0.462	-1.82287	9	115	2.425	0.597302
bcdGFP/bcdGFP	1.6145	7.72341	9	115	2.972	4.26368
bcdGFP/bcdGFP	1.46233	80.0572	9	115	3.842	2.90158
bcdGFP/bcdGFP	1.224	-44.4861	9	115	4.691	3.23232
bcdGFP/bcdGFP	0.445	-2.59961	9	115	8.16	0.881908
bcdGFP/bcdGFP	1.3055	-72.1091	9	115	12.792	1.73174
bcdGFP/bcdGFP	0.755333	-0.655001	9	115	3.176	1.4871
bcdGFP/bcdGFP	0.936	-19.9673	9	115	4.344	1.24164
bcdGFP/bcdGFP	0.33225	-66.8528	9	115	14.437	0.877653
bcdGFP/bcdGFP	1.3015	-45.9827	9	115	12.324	1.64922
bcdGFP/bcdGFP	0.418333	36.2962	9	116	7.763	0.79904
bcdGFP/bcdGFP	0.657333	-85.6358	9	116	3.752	1.2747
bcdGFP/bcdGFP	1.90625	4.33077	9	116	3.926	5.04541
bcdGFP/bcdGFP	0.807125	19.3628	9	116	2.562	4.23769
bcdGFP/bcdGFP	1.353	19.3338	9	116	3.027	1.79418
bcdGFP/bcdGFP	1.14775	6.01896	9	116	3.111	3.01361
bcdGFP/bcdGFP	0.257333	-83.5434	9	116	3.303	0.489102
bcdGFP/bcdGFP	0.869333	-44.06	9	116	9.816	1.72416
bcdGFP/bcdGFP	0.8215	41.0756	9	116	0.936	1.07449
bcdGFP/bcdGFP	0.621714	-29.9518	9	116	1.835	2.8161
bcdGFP/bcdGFP	0.599	-62.1293	9	116	4.425	0.785064
bcdGFP/bcdGFP	0.7505	53.9941	9	116	3.444	0.981512
bcdGFP/bcdGFP	0.31975	60.5081	9	116	11.565	0.814544
bcdGFP/bcdGFP	0.32375	55.4288	9	116	5.188	0.847682
bcdGFP/bcdGFP	1.57433	-18.7012	9	117	12.161	6.1254
bcdGFP/bcdGFP	0.57875	-41.9478	9	117	10.125	1.51394
bcdGFP/bcdGFP	0.562667	10.1664	9	117	5.928	1.11043
bcdGFP/bcdGFP	0.841	12.1784	9	117	9.661	1.09975
bcdGFP/bcdGFP	0.991	20.6069	9	117	5.928	1.31835
bcdGFP/bcdGFP	0.233	7.3946	9	117	2.711	0.738139
bcdGFP/bcdGFP	0.854	-55.8603	9	117	8.36	1.69633
bcdGFP/bcdGFP	0.459	18.386	9	117	3.145	1.48058
bcdGFP/bcdGFP	0.2974	77.2996	9	117	13.423	0.977927
bcdGFP/bcdGFP	0.91775	-3.34795	9	117	4.054	2.36303
bcdGFP/bcdGFP	0.934	43.2615	9	117	2.293	1.77141
bcdGFP/bcdGFP	0.7134	16.7493	9	117	3.438	2.3006
bcdGFP/bcdGFP	0.2944	10.5475	9	117	3.89	2.68232
bcdGFP/bcdGFP	0.3074	71.2788	9	117	4.294	1.01257
bcdGFP/bcdGFP	1.2795	1.21385	9	117	7.974	1.69938
bcdGFP/bcdGFP	1.6785	-7.06757	9	117	7.421	4.45384
bcdGFP/bcdGFP	0.549	-71.3654	9	117	12.9	0.726063
bcdGFP/+	0.627417	-6.19237	1	1	4.71	2.01174
bcdGFP/+	0.3785	-20.4916	1	1	6.487	0.519897
bcdGFP/+	0.4675	-9.76668	1	1	8.373	0.495177
bcdGFP/+	0.35825	-42.3246	1	1	2.754	0.378715
bcdGFP/+	0.34975	-84.2257	1	1	2.975	0.357816
bcdGFP/+	0.624455	-33.2509	1	2	3.362	1.80921
bcdGFP/+	0.763	2.29061	1	2	2.283	0.42534
bcdGFP/+	0.7004	24.6671	1	2	2.434	1.14773
bcdGFP/+	0.666778	-8.08122	1	2	4.26	1.65746
bcdGFP/+	0.508375	-44.8079	1	2	8.733	2.1086
bcdGFP/+	0.5836	29.0825	1	2	3.446	1.59854
bcdGFP/+	0.3863	-48.9995	1	2	3.151	0.871865
bcdGFP/+	0.944	-30.4213	1	2	6.877	0.525324
bcdGFP/+	0.469857	-56.6374	1	2	9.879	0.921927
bcdGFP/+	0.5425	-56.2028	1	2	5.791	0.593253
bcdGFP/+	0.814667	-12.1257	1	2	5.496	0.647445
bcdGFP/+	0.2516	67.5294	1	2	4.018	0.206693
bcdGFP/+	0.4536	-2.06648	1	2	3.123	0.582379
bcdGFP/+	0.452	-39.2257	1	2	2.856	0.253014
bcdGFP/+	0.882667	-73.1803	1	2	1.456	0.729195
bcdGFP/+	0.379091	-40.6543	1	3	8.01	2.109
bcdGFP/+	0.2423	-57.1271	1	3	3.852	0.525077
bcdGFP/+	0.29175	-35.5874	1	3	6.381	0.268067
bcdGFP/+	0.482	-43.8237	1	3	2.827	0.688867
bcdGFP/+	0.8446	-41.8888	1	3	12.104	1.08135
bcdGFP/+	0.401	-49.8739	1	3	16.313	0.457739
bcdGFP/+	0.553333	-74.9581	2	4	1.205	0.400731
bcdGFP/+	0.638	26.6701	2	4	0.479	0.487911
bcdGFP/+	0.64325	70.0894	2	4	3.85	0.67537
bcdGFP/+	0.62275	-23.5672	2	4	1.618	0.632779
bcdGFP/+	0.4892	-63.7564	2	4	1.184	0.637737
bcdGFP/+	0.5845	64.318	2	4	2.632	0.957598
bcdGFP/+	0.744333	55.0607	2	4	1.378	0.623354
bcdGFP/+	1.08067	82.5849	2	4	0.437	0.906581
bcdGFP/+	0.342	48.0509	2	5	2.918	0.557991
bcdGFP/+	0.555833	6.23606	2	5	2.744	0.911393
bcdGFP/+	0.224111	-22.2296	2	5	2.232	0.496935
bcdGFP/+	0.4734	20.8032	2	5	3.151	0.596915
bcdGFP/+	0.304333	6.48047	2	5	3.452	0.49617
bcdGFP/+	0.459333	31.7352	2	5	2.632	0.382133
bcdGFP/+	0.518	-21.1468	2	5	4.341	0.715159
bcdGFP/+	0.385333	8.36589	2	5	0.773	0.309291
bcdGFP/+	0.79	39.9475	3	6	10.74	0.826993
bcdGFP/+	0.666714	19.102	3	6	4.025	0.977843
bcdGFP/+	0.237889	-44.0371	3	6	3.903	0.504946
bcdGFP/+	0.2271	-2.77022	3	6	4.701	0.372435
bcdGFP/+	0.213353	-43.4792	3	6	3.735	0.63945
bcdGFP/+	0.218625	25.9229	3	6	3.884	0.359135
bcdGFP/+	1.541	76.9538	3	6	3.082	1.24924
bcdGFP/+	0.4125	-69.7379	4	7	24.442	0.228116
bcdGFP/+	0.370714	-20.0991	4	7	3.249	0.675115
bcdGFP/+	0.685571	-13.9805	4	7	2.592	1.24591
bcdGFP/+	0.438167	-78.7095	4	7	25.101	0.57717
bcdGFP/+	0.481429	-13.8601	5	8	1.516	0.788972
bcdGFP/+	0.644	-22.7178	5	8	3.379	0.359924
bcdGFP/+	0.815	17.382	6	9	22.876	0.874
bcdGFP/+	1.1362	68.343	6	10	2.345	1.54722
bcdGFP/+	0.881667	0.156332	6	10	3.004	0.733003
bcdGFP/+	0.329929	86.2898	7	11	2.65	0.880846
bcdGFP/+	0.44525	6.23094	7	11	2.687	0.405395
bcdGFP/+	1.01225	-55.7247	7	11	3.162	1.11334
bcdGFP/+	0.69875	7.32317	7	11	8.157	0.753143
bcdGFP/+	0.289	34.992	8	12	11.661	0.463849
bcdGFP/+	0.2282	52.7893	8	12	11.17	0.302605
bcdGFP/+	0.380083	-32.2695	8	12	13.228	1.2418
bcdGFP/+	0.377167	16.3017	8	12	14.66	0.44176
bcdGFP/+	0.373	86.9066	8	12	10.903	2.20521
bcdGFP/+	0.348286	-82.8523	8	12	3.954	0.626872
bcdGFP/+	0.268	-36.1614	8	12	4.412	1.09988
bcdGFP/+	0.587273	-35.0105	8	12	11.16	1.78134
bcdGFP/+	1.1102	-19.2937	8	12	12.819	1.47695
bcdGFP/+	0.449125	-84.7781	8	12	9.25	0.944922
bcdGFP/+	0.410667	-78.5549	8	12	8.242	0.665228
bcdGFP/+	0.2782	-59.9788	8	12	3.711	0.385753
bcdGFP/+	0.158353	71.264	8	12	4.945	0.541706
bcdGFP/+	0.2984	-77.2213	8	12	5.475	0.397854
bcdGFP/+	0.471667	-70.5733	8	12	14.273	0.712568
bcdGFP/+	0.306	20.0321	8	12	19.097	0.499201
bcdGFP/+	0.337333	-48.7113	8	12	3.969	0.524359
bcdGFP/+	0.462	-29.6872	8	12	5.075	0.3695
bcdGFP/+	0.3162	-18.3472	8	12	4.736	0.412994
bcdGFP/+	0.368667	-45.9951	8	12	5.911	0.285007
bcdGFP/+	0.209316	39.3518	8	12	18.6	0.711267
bcdGFP/+	0.2066	34.992	8	12	16.286	0.231925
bcdGFP/+	0.2235	-49.7738	8	12	5.157	0.331368
bcdGFP/+	0.206333	-6.66666	8	12	11.724	0.155048
bcdGFP/+	0.1999	62.5518	8	12	11.772	0.464263
bcdGFP/+	0.2595	-76.7479	8	12	12.226	0.283551
bcdGFP/+	0.1979	-18.8636	8	12	11.801	0.380433
bcdGFP/+	0.2318	65.9611	8	12	11.067	0.304401
bcdGFP/+	0.197833	-68.9225	8	12	6.408	0.30865
bcdGFP/+	0.2266	-35.3401	8	12	3.395	0.202272
bcdGFP/+	0.5189	-7.53148	8	12	18.332	1.67848
bcdGFP/+	0.3502	-45	8	12	11.886	0.446891
bcdGFP/+	0.817333	-33.493	8	12	11.764	0.64512
bcdGFP/+	0.579167	15.4991	8	13	11.63	2.69812
bcdGFP/+	0.248857	-57.1359	8	13	4.341	0.480975
bcdGFP/+	0.528176	-0.954841	8	13	3.735	2.40033
bcdGFP/+	0.444692	-1.29935	8	13	3.721	1.49939
bcdGFP/+	0.296125	-17.8128	8	13	5.174	0.640715
bcdGFP/+	0.386625	-12.0749	8	13	4.723	0.807874
bcdGFP/+	0.4196	-64.2136	8	13	1.426	0.625262
bcdGFP/+	0.3376	82.0799	8	13	11.183	1.46598
bcdGFP/+	0.489	-51.0122	8	13	24.706	0.654847
bcdGFP/+	0.791429	3.84474	8	13	24.633	1.49136
bcdGFP/+	0.47025	58.707	8	13	12.215	0.358095
bcdGFP/+	0.3235	40.8151	8	13	0.368	0.436033
bcdGFP/+	0.622467	-21.087	8	13	1.956	2.57654
bcdGFP/+	0.390333	-27.1959	8	13	11.855	0.649841
bcdGFP/+	0.4054	19.9734	8	13	12.266	0.506463
bcdGFP/+	0.575167	33.6444	8	13	16.495	0.696704
bcdGFP/+	0.329	-74.0859	8	13	12.483	0.251645
bcdGFP/+	0.2794	88.3424	8	13	10.818	0.31113
bcdGFP/+	0.525727	43.3868	9	14	12.592	1.58243
bcdGFP/+	0.72025	-22.7917	9	14	11.039	0.79508
bcdGFP/+	0.957667	-54.6338	9	14	10.832	1.59295
bcdGFP/+	0.607333	10.6875	9	14	11.668	2.43728
bcdGFP/+	0.341462	-2.90065	9	14	8.887	1.04734
bcdGFP/+	0.89175	-31.248	9	14	10.694	1.00242
bcdGFP/+	0.95225	-43.2344	9	14	9.847	2.13435
bcdGFP/+	0.507	-83.1322	9	14	11.574	0.63556
bcdGFP/+	0.28525	42.5104	9	14	10.764	0.27674
bcdGFP/+	0.997571	52.2939	9	14	9.266	1.9048
bcdGFP/+	0.786333	60.073	9	14	10.907	0.663465
bcdGFP/+	0.254167	54.8976	9	14	5.789	0.382582
bcdGFP/+	0.918	-89.3446	9	14	7.69	1.4861
bcdGFP/+	0.517917	9.49598	9	14	4.533	1.67901
bcdGFP/+	0.601	1.15984	9	14	4.742	1.38328
bcdGFP/+	0.652267	-62.7704	9	14	4.686	2.58328
bcdGFP/+	0.34725	11.8336	9	14	2.013	0.32184
bcdGFP/+	0.189105	-0.684282	9	14	3.591	0.921066
bcdGFP/+	0.413667	-24.9458	9	14	4.096	0.63306
bcdGFP/+	0.51575	-10.6244	9	14	4.541	2.24549
bcdGFP/+	0.759	11.6832	9	14	4.638	0.632096
bcdGFP/+	0.48	84.8444	9	14	1.1	0.267081
bcdGFP/+	0.304364	40.5943	9	14	8.246	0.883666
bcdGFP/+	1.42325	-70.8136	9	14	11.129	1.59139
bcdGFP/+	1.1175	-63.7247	9	14	9.045	0.618952
bcdGFP/+	0.254714	71.0721	9	14	8.8	0.477838
bcdGFP/+	0.217333	66.3772	9	14	9.224	0.496615
bcdGFP/+	0.3	39.6442	9	14	9.387	0.409079
bcdGFP/+	0.4096	-80.6868	9	14	9.418	0.568494
bcdGFP/+	0.240846	-65.8182	9	14	9.83	0.795834
bcdGFP/+	0.6725	-81.1001	9	14	5.455	0.368436
bcdGFP/+	0.32825	29.491	9	14	5.207	1.00754
bcdGFP/+	0.28125	70.593	9	14	4.417	0.577831
bcdGFP/+	0.6785	-70.5765	9	14	2.342	0.384906
bcdGFP/+	0.217	55.1378	9	14	5.71	0.108467
bcdGFP/+	0.6542	-46.6199	9	14	3.637	1.80101
bcdGFP/+	0.9855	79.897	9	14	5.12	0.558663
bcdGFP/+	1.55683	-40.9632	9	15	5.717	5.20307
bcdGFP/+	1.508	87.7573	9	15	2.431	2.58098
bcdGFP/+	0.923778	-12.6952	9	15	2.484	4.70502
bcdGFP/+	0.8232	16.5667	9	15	7.382	1.0767
bcdGFP/+	0.72225	85.688	9	15	10.059	0.811296
bcdGFP/+	0.8474	65.4369	9	15	8.181	2.18911
bcdGFP/+	0.575667	-33.9829	9	15	6.814	1.46526
bcdGFP/+	0.481	89.1142	9	15	0.311	1.81122
bcdGFP/+	0.6834	9.8093	9	15	6.614	0.8687
bcdGFP/+	0.829571	63.3172	9	15	5.73	1.52321
bcdGFP/+	0.498667	-62.646	9	15	2.409	0.42221
bcdGFP/+	0.313857	40.4075	9	15	2.008	0.609361
bcdGFP/+	0.495333	-18.739	9	15	6.289	0.41711
bcdGFP/+	0.7675	-56.3298	9	15	1.502	0.799046
bcdGFP/+	0.283778	-64.9614	9	15	3.449	0.637953
bcdGFP/+	0.3302	-9.62718	9	15	4.478	0.514242
bcdGFP/+	0.231222	55.8139	9	15	4.368	0.448492
bcdGFP/+	0.273	-21.2568	9	15	1.464	0.468902
bcdGFP/+	0.249167	-10.6197	9	15	9.97	0.374413
bcdGFP/+	0.993333	-40.291	9	15	3.453	0.861335
bcdGFP/+	0.49675	-30.786	9	15	5.474	0.552914
bcdGFP/+	0.506	-8.03571	9	15	7.282	0.429214
bcdGFP/+	0.451421	-29.4286	10	16	8.713	2.33648
bcdGFP/+	0.716	-58.8236	10	16	4.399	0.600764
bcdGFP/+	0.5485	-82.1756	10	16	5.473	0.609676
bcdGFP/+	0.756	-38.5538	10	16	3.838	0.421982
bcdGFP/+	0.5864	-42.6553	10	16	5.93	0.777762
bcdGFP/+	0.625	-74.8888	10	16	6.547	0.69814
bcdGFP/+	0.425778	-22.7928	10	16	3.153	1.01962
bcdGFP/+	0.831467	36.1784	10	16	2.244	3.43045
bcdGFP/+	0.7564	-44.4721	10	16	1.966	0.99777
bcdGFP/+	1.05275	14.5489	10	16	1.897	1.13851
bcdGFP/+	0.6662	-67.7673	10	16	1.932	1.03602
bcdGFP/+	0.5825	-85.3445	10	16	2.321	0.308016
bcdGFP/+	0.3708	9.01506	10	16	4.694	0.421203
bcdGFP/+	0.301667	61.4986	10	16	2.14	0.251478
bcdGFP/+	0.761	-69.8545	10	16	7.828	0.391981
bcdGFP/+	0.184656	1.0596	10	16	4.835	0.811139
bcdGFP/+	1.01567	-23.18	10	16	17.529	2.84029
bcdGFP/+	0.7705	75.9114	10	16	17.665	0.796972
bcdGFP/+	0.525	-57.7075	10	16	18.384	1.05757
bcdGFP/+	0.728	83.6598	10	16	20.822	0.398437
bcdGFP/+	0.4785	26.1786	10	16	11.003	0.530407
bcdGFP/+	0.795167	11.7417	10	16	14.994	2.55037
bcdGFP/+	0.822333	85.4749	10	16	16.287	1.35623
bcdGFP/+	0.53175	71.2001	10	16	16.574	0.546136
bcdGFP/+	1.00783	-33.8146	10	16	5.8	1.65856
bcdGFP/+	0.9798	-48.0159	10	16	4.638	1.37086
bcdGFP/+	0.60125	78.3131	10	16	5.961	0.775068
bcdGFP/+	0.429333	30.7903	10	16	8.839	0.339912
bcdGFP/+	0.3695	-55.823	10	16	6.345	0.195816
bcdGFP/+	0.276333	-31.9128	10	16	6.382	0.196736
bcdGFP/+	0.368	56.5467	10	16	5.902	0.402716
bcdGFP/+	0.5662	-14.6781	10	16	5.722	0.757729
bcdGFP/+	0.654	-84.6671	10	16	8.269	1.0867
bcdGFP/+	0.3	-26.7197	10	16	5.215	0.331386
bcdGFP/+	1.05875	51.0812	10	16	6.638	1.17475
bcdGFP/+	0.5245	-84.2301	10	16	7.416	0.288461
bcdGFP/+	0.3735	-79.895	10	16	9.904	0.205183
bcdGFP/+	0.9274	34.544	10	16	13.137	1.24683
bcdGFP/+	0.550667	-33.6901	10	16	3.486	0.432666
bcdGFP/+	0.83525	-24.0563	10	16	2.801	0.929754
bcdGFP/+	1.171	-18.2969	10	16	2.72	0.656175
bcdGFP/+	0.841667	-65.556	10	16	0.704	0.676651
bcdGFP/+	0.835625	35.5637	10	17	22.534	1.78987
bcdGFP/+	0.8068	73.8108	10	17	20.571	2.19504
bcdGFP/+	0.699	73.3234	10	17	22.886	1.93749
bcdGFP/+	0.723	-30.3282	10	17	24.01	0.402017
bcdGFP/+	0.891	-17.8706	10	17	14.515	1.73364
bcdGFP/+	0.870333	-78.2186	10	17	23.46	0.715064
bcdGFP/+	0.715167	16.8106	10	17	7.172	1.18253
bcdGFP/+	1.16657	3.47376	10	17	6.233	2.19503
bcdGFP/+	0.749	4.65018	10	17	7.238	0.41938
bcdGFP/+	0.806	-38.4215	10	17	6.169	0.450565
bcdGFP/+	1.1715	79.906	10	17	3.009	0.656156
bcdGFP/+	0.2816	-42.1915	10	17	4.579	0.375217
bcdGFP/+	0.7325	24.2469	10	17	2.513	0.409088
bcdGFP/+	0.72	15.8587	10	17	1.922	0.999025
bcdGFP/+	1.35782	67.1609	10	17	7.962	4.10157
bcdGFP/+	1.39493	85.7545	10	17	8.245	5.7949
bcdGFP/+	0.834375	21.9539	10	17	5.406	1.81351
bcdGFP/+	0.4042	-51.1018	10	17	5.218	0.525529
bcdGFP/+	0.608	24.7579	10	17	4.851	1.38974
bcdGFP/+	0.5462	-45	10	17	4.847	0.742462
bcdGFP/+	0.9845	-22.6938	10	17	8.011	0.536539
bcdGFP/+	0.4816	48.0198	10	17	4.961	0.604001
bcdGFP/+	1.5275	-15.6319	10	17	14.285	0.853571
bcdGFP/+	0.5372	-34.8216	10	17	6.669	0.716258
bcdGFP/+	0.242571	-46.2229	10	17	4.334	0.430726
bcdGFP/+	0.861111	38.0917	11	18	14.409	2.11048
bcdGFP/+	0.811333	-13.8717	11	18	17.874	0.675707
bcdGFP/+	0.6915	73.3856	11	18	15.648	0.776415
bcdGFP/+	0.811286	42.0006	11	18	16.394	1.59459
bcdGFP/+	0.743333	-74.3505	11	18	17.848	0.611675
bcdGFP/+	1.5366	-85.0775	11	18	6.657	4.3119
bcdGFP/+	1.04075	-27.3068	11	18	4.345	1.14004
bcdGFP/+	1.22267	-13.5414	11	18	4.902	2.04999
bcdGFP/+	0.771	-40.7612	11	18	4.967	0.621834
bcdGFP/+	1.01333	-15.5313	11	18	8.58	0.855229
bcdGFP/+	0.955571	1.89895	11	18	3.528	1.87103
bcdGFP/+	1.25838	51.5863	11	18	4.216	2.83583
bcdGFP/+	0.352889	42.4347	11	18	0.971	0.789923
bcdGFP/+	0.702	39.9905	11	18	3.015	0.396788
bcdGFP/+	1.459	70.9116	11	18	8.319	1.63595
bcdGFP/+	0.88725	6.38233	11	18	2.801	1.9521
bcdGFP/+	1.04933	-6.15963	11	18	3.06	0.876058
bcdGFP/+	1.314	64.2163	11	18	17.472	1.11501
bcdGFP/+	0.88025	-20.8256	11	18	11.39	0.970399
bcdGFP/+	0.5678	76.9944	11	18	9.042	0.782061
bcdGFP/+	0.920667	-46.5836	11	18	9.935	0.742038
bcdGFP/+	0.769	42.3035	11	18	16.15	0.646304
bcdGFP/+	1.091	-15.0369	11	18	3.393	0.874959
bcdGFP/+	0.944	-8.52545	11	18	3.341	0.532888
bcdGFP/+	0.73	-29.1223	11	18	4.807	0.410951
bcdGFP/+	0.457333	-18.5746	11	18	2.765	0.389278
bcdGFP/+	1.045	-82.8266	11	19	8.272	0.880895
bcdGFP/+	1.07	23.8033	11	19	8.449	0.58474
bcdGFP/+	0.252333	-1.54399	11	19	1.718	0.371135
bcdGFP/+	0.3945	-22.4221	11	19	1.597	0.222847
bcdGFP/+	1.00286	18.4349	11	19	0.412	1.88788
bcdGFP/+	0.263	49.946	11	19	9.037	0.147628
bcdGFP/+	1.39787	26.0196	11	19	12.884	5.73085
bcdGFP/+	0.82	57.8095	11	19	13.351	0.688896
bcdGFP/+	0.656333	-16.3895	11	19	13.221	0.974602
bcdGFP/+	0.551	-84.6073	12	20	9.44	0.627779
bcdGFP/+	1.06483	-40.7781	12	20	5.123	1.75769
bcdGFP/+	0.351643	54.9292	12	20	3.559	1.36968
bcdGFP/+	0.4632	-58.4551	12	20	5.282	0.659446
bcdGFP/+	0.491143	-61.2095	12	20	4.744	0.990431
bcdGFP/+	0.4245	31.9544	12	20	4.495	0.238076
bcdGFP/+	0.7025	-40.2115	12	20	2.337	0.813183
bcdGFP/+	0.906	0.71616	12	20	7.09	0.720056
bcdGFP/+	0.65875	51.6571	12	20	5.04	0.762452
bcdGFP/+	0.407909	17.3485	12	20	1.345	1.23414
bcdGFP/+	0.5368	7.54053	12	20	12.097	0.769656
bcdGFP/+	0.7385	20.8575	12	20	3.631	0.8454
bcdGFP/+	1.0775	8.72507	12	20	4.461	1.23934
bcdGFP/+	0.77025	-88.8715	12	20	5.27	0.863167
bcdGFP/+	0.5625	12.1264	12	20	5.499	0.633127
bcdGFP/+	1.37467	-12.5394	12	20	11.129	1.16991
bcdGFP/+	1.62456	-69.2718	12	20	15.437	4.4415
bcdGFP/+	0.4895	-8.96208	12	20	12.142	0.282448
bcdGFP/+	1.34933	0.989751	12	20	1.879	3.47352
bcdGFP/+	0.461	-32.0355	12	20	2.327	1.00859
bcdGFP/+	0.5015	-6.1225	12	20	3.355	0.290658
bcdGFP/+	0.473286	-32.2672	12	20	2.946	0.904718
bcdGFP/+	0.863	-6.5198	12	20	3.454	0.49319
bcdGFP/+	0.343	-18.2542	12	20	2.315	0.501224
bcdGFP/+	0.374	4.61635	12	20	6.206	0.323048
bcdGFP/+	0.279667	72.8973	12	20	3.182	0.231225
bcdGFP/+	0.427	-44.0179	12	20	2.608	0.247524
bcdGFP/+	0.3658	-28.9812	12	20	2.827	0.53042
bcdGFP/+	0.588	3.79117	12	20	6.805	0.332728
bcdGFP/+	0.6015	-20.3406	12	20	5.311	0.342348
bcdGFP/+	0.701333	-0.383886	12	20	2.413	0.597013
bcdGFP/+	1.5365	-76.9957	12	20	12.112	0.888795
bcdGFP/+	0.526	-22.1803	12	20	5.239	0.280777
bcdGFP/+	1.207	-45.232	12	20	3.183	0.698627
bcdGFP/+	0.850429	-14.856	12	20	2.323	1.71223
bcdGFP/+	0.2268	-62.6633	12	20	3.578	0.265669
bcdGFP/+	0.5395	12.9112	12	20	2.333	0.308807
bcdGFP/+	0.3395	-64.0294	12	20	2.117	0.34482
bcdGFP/+	0.613	-2.0715	12	21	17.43	0.470307
bcdGFP/+	0.890667	-35.1294	12	21	17.656	0.717731
bcdGFP/+	0.454667	-1.68019	12	21	17.675	0.375161
bcdGFP/+	1.01918	-42.8062	12	21	7.99	3.17724
bcdGFP/+	0.953	81.6813	12	21	3.929	3.39371
bcdGFP/+	0.768	-27.7342	12	21	3.15	0.438361
bcdGFP/+	1.28019	75.4573	12	21	3.45	7.5189
bcdGFP/+	1.064	47.6178	12	21	3.254	0.603792
bcdGFP/+	0.909	62.7923	12	21	3.299	0.518353
bcdGFP/+	1.1024	-44.711	12	21	5.992	1.54222
bcdGFP/+	0.749923	3.32966	12	21	9.692	2.65148
bcdGFP/+	1.3546	67.2237	12	21	4.828	1.88824
bcdGFP/+	0.493571	-44.8261	12	21	6.615	0.931971
bcdGFP/+	1.21513	7.59327	12	21	5.565	2.74709
bcdGFP/+	0.667143	23.2385	12	21	9.858	1.31792
bcdGFP/+	0.671	9.01217	12	21	3.848	0.37665
bcdGFP/+	0.6784	20.2278	12	21	3.385	0.960221
bcdGFP/+	1.1915	-23.0314	12	21	3.433	0.674787
bcdGFP/+	1.781	26.3377	12	21	10.327	1.01429
bcdGFP/+	0.4725	1.95251	12	21	2.341	0.264153
bcdGFP/+	0.421	30.2218	12	21	2.489	0.238403
bcdGFP/+	0.5575	-59.7176	12	21	12.452	0.317295
bcdGFP/+	1.043	-83.649	12	21	15.998	0.587606
bcdGFP/+	0.854	-16.9411	12	21	2.37	0.70353
bcdGFP/+	0.521333	77.1433	12	21	11.612	0.435929
bcdGFP/+	0.651	-21.5608	12	21	2.915	0.353753
bcdGFP/+	1.171	71.6746	12	21	0.28	0.66155
bcdGFP/+	0.3115	2.31706	12	21	3.328	0.173142
bcdGFP/+	0.65075	-31.7248	12	21	2.215	0.735965
bcdGFP/+	0.443	-56.4992	12	21	3.98	0.251835
bcdGFP/+	0.383333	-19.2653	12	21	10.782	0.32733
bcdGFP/+	0.918	66.1941	12	21	12.82	0.520265
bcdGFP/+	0.256	-14.4208	12	21	4.083	0.289109
bcdGFP/+	0.441333	-75.3863	12	21	4.183	0.336899
bcdGFP/+	1.15717	71.912	13	22	28.621	1.9325
bcdGFP/+	0.3295	41.097	13	22	21.16	0.363589
bcdGFP/+	1.49433	-1.00269	13	22	19.73	2.51439
bcdGFP/+	0.305	2.5603	13	22	19.685	0.738737
bcdGFP/+	0.3835	72.0968	13	22	14.144	0.647346
bcdGFP/+	0.707	87.8524	13	22	14.539	0.400281
bcdGFP/+	0.384833	63.2187	13	22	15.008	0.592562
bcdGFP/+	0.7435	60.7848	13	22	15.517	0.415906
bcdGFP/+	0.7235	46.2997	13	22	15.856	0.405276
bcdGFP/+	0.762167	-41.5356	13	22	17.1	1.26379
bcdGFP/+	0.3275	-40.7139	13	22	16.31	0.331145
bcdGFP/+	0.5818	-77.7337	13	22	5.654	1.60975
bcdGFP/+	1.05163	84.2456	13	22	6.741	2.34381
bcdGFP/+	1.00314	45.8769	13	22	6.683	1.94053
bcdGFP/+	0.88675	9.14949	13	22	4.045	0.993642
bcdGFP/+	0.611	-80.6933	13	22	9.48	0.847151
bcdGFP/+	0.234	-82.2348	13	22	12.649	0.133222
bcdGFP/+	0.33	68.8145	13	22	3.652	0.6392
bcdGFP/+	0.475667	61.6222	13	22	3.381	0.805835
bcdGFP/+	0.566	47.1508	13	22	4.097	1.11165
bcdGFP/+	0.258	-21.0375	13	22	4.927	0.292496
bcdGFP/+	0.368909	12.1898	13	22	3.277	1.13663
bcdGFP/+	0.23975	16.474	13	22	4.148	0.268002
bcdGFP/+	0.2868	8.83247	13	22	4.603	0.403788
bcdGFP/+	0.478	-3.25837	13	22	5.051	0.404654
bcdGFP/+	0.6226	-25.4733	13	22	5.41	1.73685
bcdGFP/+	0.6386	-16.0069	13	22	4.78	0.895729
bcdGFP/+	0.714667	-9.8211	13	22	5.168	0.603849
bcdGFP/+	0.563308	85.9784	13	22	14.01	2.03902
bcdGFP/+	0.5302	76.6039	13	22	16.075	0.738082
bcdGFP/+	0.82175	77.9648	13	22	13.566	1.81285
bcdGFP/+	0.579	6.10932	13	22	13.493	0.328868
bcdGFP/+	0.463	-69.2402	13	22	11.817	0.592466
bcdGFP/+	0.262667	49.427	13	22	11.078	0.219859
bcdGFP/+	0.242533	-80.743	13	22	11.218	0.963549
bcdGFP/+	0.37175	4.787	13	22	8.482	0.407421
bcdGFP/+	0.730714	-11.7292	13	22	9.146	2.86788
bcdGFP/+	0.265	0	13	22	8.527	0.29
bcdGFP/+	0.45725	-5.77123	13	22	8.524	1.03424
bcdGFP/+	0.6071	-15.7629	13	22	8.402	1.68226
bcdGFP/+	0.516545	78.1758	13	22	6.189	1.46407
bcdGFP/+	0.838	-49.9426	13	22	7.323	2.33081
bcdGFP/+	0.407	66.4087	13	22	3.804	0.344819
bcdGFP/+	0.5556	-18.1801	13	22	4.122	0.782039
bcdGFP/+	0.8774	-22.5905	13	22	3.659	1.20008
bcdGFP/+	0.8594	42.3575	13	22	1.985	1.19628
bcdGFP/+	0.611167	77.0554	13	22	0.104	1.03121
bcdGFP/+	0.583636	-28.314	13	22	3.337	1.75837
bcdGFP/+	0.32275	-5.93359	13	22	1.649	0.357918
bcdGFP/+	0.7154	-6.00901	13	22	2.991	0.974354
bcdGFP/+	0.5842	52.6344	13	22	4.204	0.80903
bcdGFP/+	0.9118	25.7307	13	22	2.713	1.2899
bcdGFP/+	1.15975	16.1455	13	22	5.593	1.2982
bcdGFP/+	0.628167	-83.5047	13	22	5.83	1.06081
bcdGFP/+	0.601	-25.8127	13	22	3.272	1.60072
bcdGFP/+	0.734375	-9.66208	13	22	3.513	1.65041
bcdGFP/+	0.41	15.3215	13	22	4.448	0.22707
bcdGFP/+	0.8175	-17.5318	13	22	6.338	0.461434
bcdGFP/+	0.89975	9.78818	13	22	8.347	1.01173
bcdGFP/+	0.511667	-50.9158	13	22	13.494	0.864445
bcdGFP/+	0.5195	7.71692	13	22	10.709	0.588328
bcdGFP/+	0.847	9.02872	13	22	8.224	0.955843
bcdGFP/+	0.694	-42.2382	13	22	11.179	0.542982
bcdGFP/+	0.48025	56.4866	13	22	5.486	0.539726
bcdGFP/+	1.13	15.9763	13	22	21.703	1.27526
bcdGFP/+	0.8455	64.584	13	22	6.078	0.468327
bcdGFP/+	1.4478	-85.7938	13	22	4.8	2.03147
bcdGFP/+	0.58775	29.5923	13	22	1.974	0.652053
bcdGFP/+	1.29139	-29.8694	13	22	11.05	10.0477
bcdGFP/+	0.332	-84.2486	13	22	6.845	0.558813
bcdGFP/+	0.945167	41.257	13	22	8.147	1.59227
bcdGFP/+	1.127	12.6848	13	22	9.504	0.956341
bcdGFP/+	1.0464	-74.4584	13	22	29.796	1.40331
bcdGFP/+	0.777	-29.8002	13	22	29.073	0.64188
bcdGFP/+	0.8975	-20.1522	13	22	24.636	1.01302
bcdGFP/+	0.73	-17.1639	13	22	11.855	0.413411
bcdGFP/+	0.55125	11.5622	13	22	3.057	0.623655
bcdGFP/+	1.03	-10.8818	13	22	0.228	1.15476
bcdGFP/+	0.444833	-9.51254	13	22	2.906	0.750317
bcdGFP/+	0.303	-13.3303	13	22	2.333	0.255895
bcdGFP/+	0.3375	28.9336	13	22	1.006	0.183962
bcdGFP/+	0.67525	53.3911	13	22	0.694	0.702607
bcdGFP/+	0.5098	46.6398	13	22	1.077	0.716593
bcdGFP/+	0.527833	-19.0654	13	22	3.357	0.890868
bcdGFP/+	0.4014	19.8469	13	22	2.139	0.539016
bcdGFP/+	0.355	2.30211	13	22	9.871	0.199161
bcdGFP/+	0.97	51.5198	13	22	13.104	0.548016
bcdGFP/+	0.173667	2.74496	13	22	13.144	0.146168
bcdGFP/+	1.13725	-74.9448	13	22	27.419	1.282
bcdGFP/+	0.4265	-4.80349	13	22	5.228	0.238839
bcdGFP/+	0.5385	-53.7567	13	22	4.853	0.292617
bcdGFP/+	0.46	-79.4504	13	22	8.213	0.251247
bcdGFP/+	0.642833	39.5062	13	22	1.171	1.07834
bcdGFP/+	0.278	-39.2722	13	22	2.023	0.233805
bcdGFP/+	0.711833	-9.59715	13	22	5.901	1.18762
bcdGFP/+	0.27825	53.8297	13	22	2.126	0.589644
bcdGFP/+	0.43675	-60.9454	13	22	4.055	0.463303
bcdGFP/+	0.5715	-39.6013	13	22	1.378	0.323167
bcdGFP/+	0.809143	9.75077	13	22	5.072	1.60012
bcdGFP/+	0.496	24.7174	13	22	1.094	0.277417
bcdGFP/+	0.3985	53.1301	13	22	0.727	0.225
bcdGFP/+	1.13	55.5009	13	22	8.965	0.942807
bcdGFP/+	0.6025	82.1024	13	22	7.53	0.662282
bcdGFP/+	0.583	83.8589	13	22	6.843	0.317824
bcdGFP/bcdGFP;;Dhc6.10/Dhc8.1	0.398333	-36.5257	1	1	6.84	1.33
bcdGFP/bcdGFP;;Dhc6.10/Dhc8.1	0.47	-41.3647	1	1	7.658	0.814104
bcdGFP/bcdGFP;;Dhc6.10/Dhc8.1	0.68125	16.464	1	1	13.119	1.56309
bcdGFP/bcdGFP;;Dhc6.10/Dhc8.1	0.6172	-75.2515	1	1	13.224	3.551
bcdGFP/bcdGFP;;Dhc6.10/Dhc8.1	0.67625	-66.4898	1	1	19.598	1.56927
bcdGFP/bcdGFP;;Dhc6.10/Dhc8.1	0.5435	-44.8343	1	1	20.572	1.22259
bcdGFP/bcdGFP;;Dhc6.10/Dhc8.1	0.4415	48.2637	1	1	20.166	0.509236
bcdGFP/bcdGFP;;Dhc6.10/Dhc8.1	0.251167	-86.3846	1	1	17.642	4.02802
bcdGFP/bcdGFP;;Dhc6.10/Dhc8.1	0.3455	-71.9728	1	1	20.953	0.355449
bcdGFP/bcdGFP;;Dhc6.10/Dhc8.1	0.870833	-26.6161	1	1	10.972	3.00885
bcdGFP/bcdGFP;;Dhc6.10/Dhc8.1	0.302	34.0403	1	1	6.133	0.68063
bcdGFP/bcdGFP;;Dhc6.10/Dhc8.1	0.350333	18.342	1	1	7.753	0.584706
bcdGFP/bcdGFP;;Dhc6.10/Dhc8.1	0.316	29.488	1	1	7.915	0.35958
bcdGFP/bcdGFP;;Dhc6.10/Dhc8.1	0.5382	72.1305	1	1	3.296	1.53821
bcdGFP/bcdGFP;;Dhc6.10/Dhc8.1	0.175111	12.0656	1	1	11.24	2.33457
bcdGFP/bcdGFP;;Dhc6.10/Dhc8.1	0.317533	-46.6509	1	1	8.632	2.57706
bcdGFP/bcdGFP;;Dhc6.10/Dhc8.1	0.4215	-35.7722	1	1	6.527	1.41986
bcdGFP/bcdGFP;;Dhc6.10/Dhc8.1	0.424	16.4229	1	1	19.501	1.64825
bcdGFP/bcdGFP;;Dhc6.10/Dhc8.1	0.544929	60.8162	1	1	5.375	4.39489
bcdGFP/bcdGFP;;Dhc6.10/Dhc8.1	0.436333	-81.6009	1	1	7.821	0.753077
bcdGFP/bcdGFP;;Dhc6.10/Dhc8.1	0.356333	65.5408	1	1	11.066	0.620704
bcdGFP/bcdGFP;;Dhc6.10/Dhc8.1	0.39195	74.3342	1	1	6.45	4.30699
bcdGFP/bcdGFP;;Dhc6.10/Dhc8.1	0.545667	43.6618	1	1	10.576	1.87717
bcdGFP/bcdGFP;;Dhc6.10/Dhc8.1	0.544353	-84.0304	1	1	13.071	5.32689
bcdGFP/bcdGFP;;Dhc6.10/Dhc8.1	0.246333	-48.6522	1	1	10.559	0.39962
bcdGFP/bcdGFP;;Dhc6.10/Dhc8.1	0.2555	-35.7345	1	1	10.224	0.575313
bcdGFP/bcdGFP;;Dhc6.10/Dhc8.1	0.239714	-47.6348	1	1	9.812	1.76893
bcdGFP/bcdGFP;;Dhc6.10/Dhc8.1	0.19625	15.5688	1	1	8.513	1.71388
bcdGFP/bcdGFP;;Dhc6.10/Dhc8.1	0.406	38.4705	1	1	7.782	0.472584
bcdGFP/bcdGFP;;Dhc6.10/Dhc8.1	0.513	45.3029	1	1	5.722	1.47151
bcdGFP/bcdGFP;;Dhc6.10/Dhc8.1	0.47625	-59.341	1	1	3.109	2.19247
bcdGFP/bcdGFP;;Dhc6.10/Dhc8.1	0.260846	8.09093	1	1	9.088	1.86153
bcdGFP/bcdGFP;;Dhc6.10/Dhc8.1	0.498556	-45.871	1	1	8.438	2.51193
bcdGFP/bcdGFP;;Dhc6.10/Dhc8.1	0.3085	13.0188	1	1	11.772	0.710256
bcdGFP/bcdGFP;;Dhc6.10/Dhc8.1	0.424333	-5.20849	1	1	13.346	0.738047
bcdGFP/bcdGFP;;Dhc6.10/Dhc8.1	0.259333	-73.0297	1	1	11.28	0.445394
bcdGFP/bcdGFP;;Dhc6.10/Dhc8.1	0.115875	-48.2296	1	1	9.968	0.903703
bcdGFP/bcdGFP;;Dhc6.10/Dhc8.1	0.101778	-45.4441	1	1	3.804	0.456098
bcdGFP/bcdGFP;;Dhc6.10/Dhc8.1	0.23275	32.4712	1	1	2.878	0.521536
bcdGFP/bcdGFP;;Dhc6.10/Dhc8.1	0.126857	29.3947	1	1	4.812	0.507312
bcdGFP/bcdGFP;;Dhc6.10/Dhc8.1	0.19	49.0391	1	1	5.141	1.05409
bcdGFP/bcdGFP;;Dhc6.10/Dhc8.1	0.2146	73.0586	1	1	2.666	1.20112
bcdGFP/bcdGFP;;Dhc6.10/Dhc8.1	0.155333	-79.8085	1	1	3.919	0.27128
bcdGFP/bcdGFP;;Dhc6.10/Dhc8.1	0.2795	-88.394	1	1	7.039	0.321126
bcdGFP/bcdGFP;;Dhc6.10/Dhc8.1	0.295889	-10.4423	1	1	8.851	1.52831
bcdGFP/bcdGFP;;Dhc6.10/Dhc8.1	0.406	-87.6909	1	1	4.319	0.868705
bcdGFP/bcdGFP;;Dhc6.10/Dhc8.1	0.3625	19.888	1	1	5.917	0.411545
bcdGFP/bcdGFP;;Dhc6.10/Dhc8.1	0.134	-89.0156	1	1	4.649	0.291043
bcdGFP/bcdGFP;;Dhc6.10/Dhc8.1	0.4135	89.8789	1	1	12.038	0.946002
bcdGFP/bcdGFP;;Dhc6.10/Dhc8.1	0.242714	14.9186	1	1	12.429	0.866197
bcdGFP/bcdGFP;;Dhc6.10/Dhc8.1	0.6148	57.8852	2	2	7.412	1.77571
bcdGFP/bcdGFP;;Dhc6.10/Dhc8.1	0.3908	-24.6429	2	2	9.17	1.12001
bcdGFP/bcdGFP;;Dhc6.10/Dhc8.1	0.947	17.6548	2	2	5.874	3.15878
bcdGFP/bcdGFP;;Dhc6.10/Dhc8.1	0.6259	-33.3759	2	2	4.266	3.54098
bcdGFP/bcdGFP;;Dhc6.10/Dhc8.1	0.5655	-14.0793	2	2	4.646	0.645387
bcdGFP/bcdGFP;;Dhc6.10/Dhc8.1	0.541	-73.5741	2	2	5.647	0.622403
bcdGFP/bcdGFP;;Dhc6.10/Dhc8.1	0.502556	52.5968	2	2	7.206	2.51391
bcdGFP/bcdGFP;;Dhc6.10/Dhc8.1	0.4716	84.2809	2	2	7.069	1.33464
bcdGFP/bcdGFP;;Dhc6.10/Dhc8.1	0.493333	-26.5651	2	2	7.256	0.860886
bcdGFP/bcdGFP;;Dhc6.10/Dhc8.1	0.429263	9.60047	2	2	4.639	4.77285
bcdGFP/bcdGFP;;Dhc6.10/Dhc8.1	0.286917	6.27371	2	2	3.182	1.9034
bcdGFP/bcdGFP;;Dhc6.10/Dhc8.1	0.2986	-25.1374	2	2	8.171	0.861601
bcdGFP/bcdGFP;;Dhc6.10/Dhc8.1	0.34	-71.5741	2	2	5.146	2.009
bcdGFP/bcdGFP;;Dhc6.10/Dhc8.1	0.146	40.1421	2	2	2.685	0.39244
bcdGFP/bcdGFP;;Dhc6.10/Dhc8.1	0.645333	-15.6403	2	2	2.85	1.10906
bcdGFP/bcdGFP;;Dhc6.10/Dhc8.1	0.326429	2.88422	2	2	5.524	1.31166
bcdGFP/bcdGFP;;Dhc6.10/Dhc8.1	0.513167	-42.0987	2	2	6.035	1.71835
bcdGFP/bcdGFP;;Dhc6.10/Dhc8.1	0.384333	-0.0654996	2	2	3.988	3.499
bcdGFP/bcdGFP;;Dhc6.10/Dhc8.1	0.586111	19.5956	2	2	2.333	3.04432
bcdGFP/bcdGFP;;Dhc6.10/Dhc8.1	0.421833	-11.2172	2	2	4.045	1.45479
bcdGFP/bcdGFP;;Dhc6.10/Dhc8.1	0.2865	16.7612	2	2	3.594	0.974397
bcdGFP/bcdGFP;;Dhc6.10/Dhc8.1	0.239476	23.8134	2	2	3.164	2.88786
bcdGFP/bcdGFP;;Dhc6.10/Dhc8.1	0.658	-20.3224	2	2	6.412	5.13674
bcdGFP/bcdGFP;;Dhc6.10/Dhc8.1	0.45275	50.4183	2	2	10.046	1.04837
bcdGFP/bcdGFP;;Dhc6.10/Dhc8.1	0.545	25.7933	2	2	11.094	2.82217
bcdGFP/bcdGFP;;Dhc6.10/Dhc8.1	0.3402	-5.50127	2	2	14.002	0.980516
bcdGFP/bcdGFP;;Dhc6.10/Dhc8.1	0.3626	-14.14	2	2	5.77	2.0099
bcdGFP/bcdGFP;;Dhc6.10/Dhc8.1	0.385308	80.8256	2	2	11.75	2.71574
bcdGFP/bcdGFP;;Dhc6.10/Dhc8.1	0.195357	-3.30187	2	2	3.807	1.51051
bcdGFP/bcdGFP;;Dhc6.10/Dhc8.1	0.4915	-75.8582	2	2	4.31	1.71085
bcdGFP/bcdGFP;;Dhc6.10/Dhc8.1	0.39025	0.959103	2	2	3.151	1.79225
bcdGFP/bcdGFP;;Dhc6.10/Dhc8.1	0.335778	-5.53189	2	2	3.25	1.69087
bcdGFP/bcdGFP;;Dhc6.10/Dhc8.1	0.3585	9.42956	2	2	4.025	2.87485
bcdGFP/bcdGFP;;Dhc6.10/Dhc8.1	0.258	10.0302	2	2	4.531	1.49282
bcdGFP/bcdGFP;;Dhc6.10/Dhc8.1	0.294375	3.33181	2	2	2.987	1.3593
bcdGFP/bcdGFP;;Dhc6.10/Dhc8.1	0.2795	14.4941	2	2	4.216	1.57823
bcdGFP/bcdGFP;;Dhc6.10/Dhc8.1	0.621	6.22873	2	2	1.685	2.49774
bcdGFP/bcdGFP;;Dhc6.10/Dhc8.1	0.27325	-16.4328	2	2	2.341	0.597403
bcdGFP/bcdGFP;;Dhc6.10/Dhc8.1	0.361333	-63.078	2	2	8.287	1.29203
bcdGFP/bcdGFP;;Dhc6.10/Dhc8.1	0.589	58.5251	2	2	11.699	1.01891
bcdGFP/bcdGFP;;Dhc6.10/Dhc8.1	0.144	-46.2545	2	2	3.616	0.872072
bcdGFP/bcdGFP;;Dhc6.10/Dhc8.1	0.43725	-23.9158	2	2	4.46	0.996563
bcdGFP/bcdGFP;;Dhc6.10/Dhc8.1	0.4825	86.0972	2	2	7.227	0.558295
bcdGFP/bcdGFP;;Dhc6.10/Dhc8.1	0.398667	23.3616	2	2	4.527	1.3845
bcdGFP/bcdGFP;;Dhc6.10/Dhc8.1	0.421333	23.2088	2	2	4.298	0.733346
bcdGFP/bcdGFP;;Dhc6.10/Dhc8.1	0.446	34.4443	2	2	4.79	0.505653
bcdGFP/bcdGFP;;Dhc6.10/Dhc8.1	0.1955	-68.6821	2	2	10.114	0.66017
bcdGFP/bcdGFP;;Dhc6.10/Dhc8.1	0.301	-21.3458	2	2	14.14	0.467039
bcdGFP/bcdGFP;;Dhc6.10/Dhc8.1	0.447667	25.6743	2	2	10.133	1.55336
bcdGFP/bcdGFP;;Dhc6.10/Dhc8.1	0.262333	-34.9814	2	2	2.003	0.443041
bcdGFP/bcdGFP;;Dhc6.10/Dhc8.1	0.458	-82.3395	2	2	3.78	0.51762
bcdGFP/bcdGFP;;Dhc6.10/Dhc8.1	0.21325	-2.00955	2	2	4.851	0.456281
bcdGFP/bcdGFP;;Dhc6.10/Dhc8.1	0.516333	-86.4356	2	2	5.184	0.900742
bcdGFP/bcdGFP;;Dhc6.10/Dhc8.1	0.2835	-49.6534	2	2	0.927	0.610123
bcdGFP/bcdGFP;;Dhc6.10/Dhc8.1	0.4634	-15.0783	2	2	4.813	1.307
bcdGFP/bcdGFP;;Dhc6.10/Dhc8.1	0.2925	-42.4897	2	2	2.861	0.339029
bcdGFP/bcdGFP;;Dhc6.10/Dhc8.1	0.2725	-70.4205	2	2	11.86	0.934007
bcdGFP/bcdGFP;;Dhc6.10/Dhc8.1	0.3595	-45.0488	2	2	9.229	0.829437
bcdGFP/bcdGFP;;Dhc6.10/Dhc8.1	0.318833	81.7406	2	2	10.454	1.06505
bcdGFP/bcdGFP;;Dhc6.10/Dhc8.1	0.3465	12.9834	2	2	15.052	0.382786
bcdGFP/bcdGFP;;Dhc6.10/Dhc8.1	0.38575	30.1568	2	2	1.708	0.828077
bcdGFP/bcdGFP;;Dhc6.10/Dhc8.1	0.185333	-1.08433	2	2	2.207	0.317057
bcdGFP/bcdGFP;;Dhc6.10/Dhc8.1	0.2082	-5.75826	2	2	3.689	0.598018
bcdGFP/bcdGFP;;Dhc6.10/Dhc8.1	0.403	84.4842	2	2	8.998	0.468168
bcdGFP/bcdGFP;;Dhc6.10/Dhc8.1	0.443833	44.5181	2	2	8.942	1.51326
bcdGFP/bcdGFP;;Dhc6.10/Dhc8.1	0.452714	19.6388	2	2	7.986	1.79119
bcdGFP/bcdGFP;;Dhc6.10/Dhc8.1	0.34725	-21.8962	2	2	5.188	0.785678
bcdGFP/bcdGFP;;Dhc6.10/Dhc8.1	0.522333	31.8776	2	2	7.951	0.903226
bcdGFP/bcdGFP;;Dhc6.10/Dhc8.1	0.2934	-10.3437	2	2	3.141	0.790853
bcdGFP/bcdGFP;;Dhc6.10/Dhc8.1	0.350333	-16.0566	2	2	3.95	0.495323
bcdGFP/bcdGFP;;Dhc6.10/Dhc8.1	0.389	2.88422	2	2	3.942	0.655831
bcdGFP/bcdGFP;;Dhc6.10/Dhc8.1	0.3755	10.1824	2	2	2.172	0.418593
bcdGFP/bcdGFP;;Dhc6.10/Dhc8.1	0.231333	-45.7279	2	2	3.307	1.16894
bcdGFP/bcdGFP;;Dhc6.10/Dhc8.1	0.2615	1.48511	2	2	8.133	0.270091
bcdGFP/bcdGFP;;Dhc6.10/Dhc8.1	0.402667	15.4647	2	2	3.196	0.671305
bcdGFP/bcdGFP;;Dhc6.10/Dhc8.1	0.219	-61.6208	2	2	3.908	0.494419
bcdGFP/bcdGFP;;Dhc6.10/Dhc8.1	0.2915	57.0694	2	2	4.583	0.334791
bcdGFP/bcdGFP;;Dhc6.10/Dhc8.1	0.197	72.6686	2	2	2.15	0.755292
bcdGFP/bcdGFP;;Dhc6.10/Dhc8.1	0.846667	-17.6315	2	2	9.445	1.46586
bcdGFP/bcdGFP;;Dhc6.10/Dhc8.1	0.339	3.00769	2	2	0.175	0.590814
bcdGFP/bcdGFP;;Dhc6.10/Dhc8.1	0.445857	57.779	3	3	10.435	1.77424
bcdGFP/bcdGFP;;Dhc6.10/Dhc8.1	0.4895	-44.7611	3	3	5.851	1.69566
bcdGFP/bcdGFP;;Dhc6.10/Dhc8.1	0.3586	71.967	3	3	13.199	0.991715
bcdGFP/bcdGFP;;Dhc6.10/Dhc8.1	0.961333	37.1754	3	3	12.263	1.68802
bcdGFP/bcdGFP;;Dhc6.10/Dhc8.1	0.71	-7.00488	3	3	13.381	0.828182
bcdGFP/bcdGFP;;Dhc6.10/Dhc8.1	0.7335	-60.5344	3	3	18.152	3.3584
bcdGFP/bcdGFP;;Dhc6.10/Dhc8.1	0.4725	-79.6809	3	3	14.932	1.07743
bcdGFP/bcdGFP;;Dhc6.10/Dhc8.1	0.82025	74.9881	3	3	12.905	1.88017
bcdGFP/bcdGFP;;Dhc6.10/Dhc8.1	0.468333	-65.4401	3	3	19.345	0.818007
bcdGFP/bcdGFP;;Dhc6.10/Dhc8.1	0.601	21.3475	3	3	18.774	0.70325
bcdGFP/bcdGFP;;Dhc6.10/Dhc8.1	0.6515	32.9164	3	3	17.649	0.760009
bcdGFP/bcdGFP;;Dhc6.10/Dhc8.1	0.400471	39.1253	3	3	20.503	3.80655
bcdGFP/bcdGFP;;Dhc6.10/Dhc8.1	0.858	47.6155	3	3	19.701	1.98338
bcdGFP/bcdGFP;;Dhc6.10/Dhc8.1	0.7406	6.49833	3	3	25.364	2.12062
bcdGFP/bcdGFP;;Dhc6.10/Dhc8.1	0.6852	-28.6731	3	3	25.613	1.96952
bcdGFP/bcdGFP;;Dhc6.10/Dhc8.1	0.4506	65.0132	3	3	21.593	1.26654
bcdGFP/bcdGFP;;Dhc6.10/Dhc8.1	0.81325	-88.1381	3	3	25.4	3.75498
bcdGFP/bcdGFP;;Dhc6.10/Dhc8.1	0.812	65.4132	3	3	23.311	1.8915
bcdGFP/bcdGFP;;Dhc6.10/Dhc8.1	0.92725	-21.6927	3	3	19.935	2.15351
bcdGFP/bcdGFP;;Dhc6.10/Dhc8.1	0.3032	7.30409	3	3	21.709	0.873085
bcdGFP/bcdGFP;;Dhc6.10/Dhc8.1	0.491	-84.7792	3	3	22.08	1.57152
bcdGFP/bcdGFP;;Dhc6.10/Dhc8.1	0.844769	-58.8355	3	3	25.361	6.31307
bcdGFP/bcdGFP;;Dhc6.10/Dhc8.1	0.687	4.34953	3	3	20.068	0.804316
bcdGFP/bcdGFP;;Dhc6.10/Dhc8.1	0.3658	80.9849	3	3	0.75	1.05301
bcdGFP/bcdGFP;;Dhc6.10/Dhc8.1	0.4696	76.1997	3	3	2.597	1.2367
bcdGFP/bcdGFP;;Dhc6.10/Dhc8.1	0.472833	-0.105842	3	3	2.928	1.624
bcdGFP/bcdGFP;;Dhc6.10/Dhc8.1	1.0895	78.9405	3	3	4.35	1.25633
bcdGFP/bcdGFP;;Dhc6.10/Dhc8.1	0.335	-7.08848	3	3	0.777	0.58346
bcdGFP/bcdGFP;;Dhc6.10/Dhc8.1	0.483667	-28.903	3	3	2.69	0.844147
bcdGFP/bcdGFP;;Dhc6.10/Dhc8.1	0.518	37.426	3	3	2.334	0.906643
bcdGFP/bcdGFP;;Dhc6.10/Dhc8.1	0.325	-43.4696	3	3	2.796	0.370656
bcdGFP/bcdGFP;;Dhc6.10/Dhc8.1	0.5592	-42.1087	3	3	5.332	1.61213
bcdGFP/bcdGFP;;Dhc6.10/Dhc8.1	0.631	-57.9208	3	3	1.687	0.739985
bcdGFP/bcdGFP;;Dhc6.10/Dhc8.1	0.567	89.1552	3	3	27.637	1.49216
bcdGFP/bcdGFP;;Dhc6.10/Dhc8.1	0.596	78.6412	3	3	29.378	0.690525
bcdGFP/bcdGFP;;Dhc6.10/Dhc8.1	0.489111	-15.0286	3	3	29.373	2.50674
bcdGFP/bcdGFP;;Dhc6.10/Dhc8.1	0.281941	-75.9446	3	3	30.896	2.90703
bcdGFP/bcdGFP;;Dhc6.10/Dhc8.1	0.5	-0.591674	3	3	23.953	0.581031
bcdGFP/bcdGFP;;Dhc6.10/Dhc8.1	0.654	24.3818	3	3	23.898	0.763053
bcdGFP/bcdGFP;;Dhc6.10/Dhc8.1	0.46725	-84.3053	3	3	31.082	1.07832
bcdGFP/bcdGFP;;Dhc6.10/Dhc8.1	0.688667	-46.7973	3	3	29.659	1.19489
bcdGFP/bcdGFP;;Dhc6.10/Dhc8.1	0.49775	63.576	3	3	29.011	1.08986
bcdGFP/bcdGFP;;Dhc6.10/Dhc8.1	0.736	-53.4408	3	3	30.914	1.29102
bcdGFP/bcdGFP;;Dhc6.10/Dhc8.1	0.7574	-37.4395	3	3	30.388	2.19271
bcdGFP/bcdGFP;;Dhc6.10/Dhc8.1	0.330333	63.1243	3	3	29.072	0.577361
bcdGFP/bcdGFP;;Dhc6.10/Dhc8.1	0.7998	-29.9263	3	3	29.355	2.31115
bcdGFP/bcdGFP;;Dhc6.10/Dhc8.1	0.441	-53.006	3	3	30.816	1.0154
bcdGFP/bcdGFP;;Dhc6.10/Dhc8.1	0.738	-51.1803	3	3	31.782	1.28735
bcdGFP/bcdGFP;;Dhc6.10/Dhc8.1	0.412	-88.8115	3	3	31.555	0.482104
bcdGFP/bcdGFP;;Dhc6.10/Dhc8.1	0.475333	88.524	3	3	31.078	0.815271
bcdGFP/bcdGFP;;Dhc6.10/Dhc8.1	0.423333	26.0647	3	3	29.562	0.716911
bcdGFP/bcdGFP;;Dhc6.10/Dhc8.1	0.7455	1.30045	3	3	8.628	2.59967
bcdGFP/bcdGFP;;Dhc6.10/Dhc8.1	0.822444	-8.6537	3	3	8.698	4.24027
bcdGFP/bcdGFP;;Dhc6.10/Dhc8.1	0.4165	-19.3247	3	3	4.54	0.46839
bcdGFP/bcdGFP;;Dhc6.10/Dhc8.1	0.6688	66.0678	3	3	3.671	1.91789
bcdGFP/bcdGFP;;Dhc6.10/Dhc8.1	0.452	44.0659	3	3	4.625	1.041
bcdGFP/bcdGFP;;Dhc6.10/Dhc8.1	0.395333	-57.5741	3	3	4.873	0.678841
bcdGFP/bcdGFP;;Dhc6.10/Dhc8.1	0.4595	30.3501	3	3	5.155	0.528417
bcdGFP/bcdGFP;;Dhc6.10/Dhc8.1	0.3585	-2.19207	3	3	7.072	0.418306
bcdGFP/bcdGFP;;Dhc6.10/Dhc8.1	0.472	59.3394	3	3	6.537	0.551033
bcdGFP/bcdGFP;;Dhc6.10/Dhc8.1	0.609333	16.7769	3	3	4.686	1.06012
bcdGFP/bcdGFP;;Dhc6.10/Dhc8.1	0.502667	60.9328	3	3	3.331	0.880956
bcdGFP/bcdGFP;;Dhc6.10/Dhc8.1	0.467667	-24.5672	3	3	3.289	0.808159
bcdGFP/bcdGFP;;Dhc6.10/Dhc8.1	0.321286	13.7452	3	3	3.494	1.24156
bcdGFP/bcdGFP;;Dhc6.10/Dhc8.1	0.1615	-35.9358	3	3	3.808	0.368049
bcdGFP/bcdGFP;;Dhc6.10/Dhc8.1	0.5385	-3.18153	3	3	3.356	1.87389
bcdGFP/bcdGFP;;Dhc6.10/Dhc8.1	0.351	-35.7234	3	3	4.856	0.609722
bcdGFP/bcdGFP;;Dhc6.10/Dhc8.1	0.367667	26.4441	3	3	12.47	0.635492
bcdGFP/bcdGFP;;Dhc6.10/Dhc8.1	0.3986	-76.5445	3	3	15.115	1.0529
bcdGFP/bcdGFP;;Dhc6.10/Dhc8.1	0.273333	-85.8765	3	3	13.24	0.431116
bcdGFP/bcdGFP;;Dhc6.10/Dhc8.1	1.091	-13.3106	3	3	14.381	1.26395
bcdGFP/bcdGFP;;Dhc6.10/Dhc8.1	0.632333	25.9093	3	3	7.641	1.05505
bcdGFP/bcdGFP;;Dhc6.10/Dhc8.1	0.636667	-79.587	3	3	12.443	1.08995
bcdGFP/bcdGFP;;Dhc6.10/Dhc8.1	0.599857	82.5676	3	3	14.897	2.42739
bcdGFP/bcdGFP;;Dhc6.10/Dhc8.1	0.368667	74.4408	3	3	13.168	0.611406
bcdGFP/bcdGFP;;Dhc6.10/Dhc8.1	0.4485	80.6159	3	3	12.212	0.962886
bcdGFP/bcdGFP;;Dhc6.10/Dhc8.1	0.562	-35.7289	3	3	11.286	1.63712
bcdGFP/bcdGFP;;Dhc6.10/Dhc8.1	0.463	34.8188	3	3	11.984	1.08409
bcdGFP/bcdGFP;;Dhc6.10/Dhc8.1	0.4855	34.7037	3	3	10.813	1.69321
bcdGFP/bcdGFP;;Dhc6.10/Dhc8.1	0.815667	25.1968	3	3	8.536	1.42344
bcdGFP/bcdGFP;;Dhc6.10/Dhc8.1	1.1244	38.9718	3	3	9.237	3.09728
bcdGFP/bcdGFP;;Dhc6.10/Dhc8.1	0.2555	-23.2752	3	3	11.246	0.490955
bcdGFP/bcdGFP;;Dhc6.10/Dhc8.1	0.517714	-88.5268	3	3	13.04	2.02267
bcdGFP/bcdGFP;;Dhc6.10/Dhc8.1	0.461	27.7387	3	3	11.412	0.807837
bcdGFP/bcdGFP;;Dhc6.10/Dhc8.1	0.250333	42.1893	3	3	4.41	0.82194
bcdGFP/bcdGFP;;Dhc6.10/Dhc8.1	0.648	58.3824	3	3	19.544	1.11207
bcdGFP/bcdGFP;;Dhc6.10/Dhc8.1	0.468333	-25.4237	3	3	21.129	0.808275
bcdGFP/bcdGFP;;Dhc6.10/Dhc8.1	0.419125	44.7647	3	3	18.51	1.89436
bcdGFP/bcdGFP;;Dhc6.10/Dhc8.1	0.277	56.3616	3	3	19.567	0.922467
bcdGFP/bcdGFP;;Dhc6.10/Dhc8.1	0.500429	78.3727	3	3	16.268	2.33696
bcdGFP/bcdGFP;;Dhc6.10/Dhc8.1	0.469	22.2807	3	3	18.654	0.532779
bcdGFP/bcdGFP;;Dhc6.10/Dhc8.1	0.55325	-37.5944	3	3	9.695	1.2179
bcdGFP/bcdGFP;;Dhc6.10/Dhc8.1	0.7528	-37.3869	3	3	5.684	2.90352
bcdGFP/bcdGFP;;Dhc6.10/Dhc8.1	0.387	1.50916	3	3	4.969	0.873303
bcdGFP/bcdGFP;;Dhc6.10/Dhc8.1	0.452	85.5598	3	3	4.097	0.529589
bcdGFP/bcdGFP;;Dhc6.10/Dhc8.1	0.411	65.2584	3	3	5.139	0.477866
bcdGFP/bcdGFP;;Dhc6.10/Dhc8.1	0.822	60.292	3	3	5.281	0.96251
bcdGFP/bcdGFP;;Dhc6.10/Dhc8.1	0.273333	-56.7171	3	3	6.097	0.936635
bcdGFP/bcdGFP;;Dhc6.10/Dhc8.1	0.9	-12.5915	3	3	7.189	2.578
bcdGFP/bcdGFP;;Dhc6.10/Dhc8.1	0.575	-18.5611	3	3	11.108	1.00529
bcdGFP/bcdGFP;;Dhc6.10/Dhc8.1	0.321833	-86.6405	3	3	5.875	0.972672
bcdGFP/bcdGFP;;Dhc6.10/Dhc8.1	0.879	4.30447	3	3	5.802	1.02589
bcdGFP/bcdGFP;;Dhc6.10/Dhc8.1	0.551	4.46716	3	3	6.538	1.2839
bcdGFP/bcdGFP;;Dhc6.10/Dhc8.1	0.93725	20.4087	3	3	5.5	2.18517
bcdGFP/bcdGFP;;Dhc6.10/Dhc8.1	0.48	-50.1744	3	3	4.176	1.09766
bcdGFP/bcdGFP;;Dhc6.10/Dhc8.1	0.284333	2.40597	3	3	5.481	0.47642
bcdGFP/bcdGFP;;Dhc6.10/Dhc8.1	0.607333	-59.5727	3	3	4.488	1.06231
bcdGFP/bcdGFP;;Dhc6.10/Dhc8.1	0.2215	52.9269	3	3	8.022	0.507603
bcdGFP/bcdGFP;;Dhc6.10/Dhc8.1	0.5805	71.4424	3	3	1.456	1.32911
bcdGFP/bcdGFP;;Dhc6.10/Dhc8.1	0.437143	-19.6632	3	3	2.675	1.63749
bcdGFP/bcdGFP;;Dhc6.10/Dhc8.1	0.197	-24.8563	3	3	10.136	0.344955
bcdGFP/bcdGFP;;Dhc6.10/Dhc8.1	0.5265	-26.692	3	3	35.352	0.605529
bcdGFP/bcdGFP;;Dhc6.10/Dhc8.1	0.852	73.9189	3	3	28.224	0.985565
bcdGFP/bcdGFP;;Dhc6.10/Dhc8.1	0.522	71.2089	3	3	35.884	0.915813
bcdGFP/bcdGFP;;Dhc6.10/Dhc8.1	0.5429	16.2423	3	3	26.442	3.07472
bcdGFP/bcdGFP;;Dhc6.10/Dhc8.1	0.620333	-79.7427	3	3	23.459	1.07823
bcdGFP/bcdGFP;;Dhc6.10/Dhc8.1	0.336429	-73.3418	3	3	24.768	1.33607
bcdGFP/bcdGFP;;Dhc6.10/Dhc8.1	0.4665	47.5697	3	3	21.383	1.62444
bcdGFP/bcdGFP;;Dhc6.10/Dhc8.1	0.611	-52.6302	3	3	24.097	1.05444
bcdGFP/bcdGFP;;Dhc6.10/Dhc8.1	0.495286	62.4717	3	3	19.604	1.88885
bcdGFP/bcdGFP;;Dhc6.10/Dhc8.1	0.728833	7.0077	3	3	19.295	2.48355
bcdGFP/bcdGFP;;Dhc6.10/Dhc8.1	0.243	17.5695	3	3	19.529	0.523417
bcdGFP/bcdGFP;;Dhc6.10/Dhc8.1	0.645	48.5069	3	3	16.472	1.49125
bcdGFP/bcdGFP;;Dhc6.10/Dhc8.1	0.2808	80.5007	3	3	18.036	0.763469
bcdGFP/bcdGFP;;Dhc6.10/Dhc8.1	0.649	35.4357	3	3	11.849	1.50227
bcdGFP/bcdGFP;;Dhc6.10/Dhc8.1	0.372556	83.6425	3	3	17.217	1.82422
bcdGFP/bcdGFP;;Dhc6.10/Dhc8.1	0.443909	38.9839	3	3	19.559	2.67842
bcdGFP/bcdGFP;;Dhc6.10/Dhc8.1	0.728333	-47.3542	3	3	15.938	3.56329
bcdGFP/bcdGFP;;Dhc6.10/Dhc8.1	0.446	-23.0818	3	3	10.861	0.515248
bcdGFP/bcdGFP;;Dhc6.10/Dhc8.1	0.655667	-36.9909	3	3	8.768	1.1368
bcdGFP/bcdGFP;;Dhc6.10/Dhc8.1	0.487	-75.1882	3	3	21.45	1.66637
bcdGFP/bcdGFP;;Dhc6.10/Dhc8.1	0.741	12.8523	3	3	27.649	0.845175
bcdGFP/bcdGFP;;Dhc6.10/Dhc8.1	0.59675	-30.9924	3	3	40.946	1.37302
bcdGFP/bcdGFP;;Dhc6.10/Dhc8.1	0.832	-62.5624	3	3	39.12	1.38026
bcdGFP/bcdGFP;;Dhc6.10/Dhc8.1	0.208	0.320981	3	3	3.066	0.357006
bcdGFP/bcdGFP;;Dhc6.10/Dhc8.1	0.742333	6.03894	3	3	3.076	1.30223
bcdGFP/bcdGFP;;Dhc6.10/Dhc8.1	0.278	-35.1783	3	3	2.932	0.630075
bcdGFP/bcdGFP;;Dhc6.10/Dhc8.1	0.968143	-12.6994	3	3	2.402	3.89837
bcdGFP/bcdGFP;;Dhc6.10/Dhc8.1	1.0445	12.0716	3	3	3.612	1.20975
bcdGFP/bcdGFP;;Dhc6.10/Dhc8.1	0.662	23.0818	3	3	3.801	0.772871
bcdGFP/bcdGFP;;Dhc6.10/Dhc8.1	0.472	83.9801	3	3	4.835	0.55305
bcdGFP/bcdGFP;;Dhc6.10/Dhc8.1	0.2895	-7.95565	3	3	3.129	0.325129
bcdGFP/bcdGFP;;Dhc6.10/Dhc8.1	0.231167	-1.65953	3	3	2.482	2.20993
bcdGFP/bcdGFP;;Dhc6.10/Dhc8.1	0.4635	-82.5041	3	3	4.126	0.536586
bcdGFP/bcdGFP;;Dhc6.10/Dhc8.1	0.188333	-14.8414	3	3	2.57	0.327941
bcdGFP/bcdGFP;;Dhc6.10/Dhc8.1	0.502667	6.72925	3	3	25.411	0.861938
bcdGFP/bcdGFP;;Dhc6.10/Dhc8.1	0.379	-36.99	3	3	25.941	0.954002
bcdGFP/bcdGFP;;Dhc6.10/Dhc8.1	0.305	86.0403	3	3	11.608	0.680625
bcdGFP/bcdGFP;;Dhc6.10/Dhc8.1	0.839667	-37.5662	3	3	12.615	1.44831
bcdGFP/bcdGFP;;Dhc6.10/Dhc8.1	0.32	82	3	3	9.713	0.373636
bcdGFP/bcdGFP;;Dhc6.10/Dhc8.1	0.419	84.2497	3	3	8.654	0.718616
bcdGFP/bcdGFP;;Dhc6.10/Dhc8.1	0.2065	60.4365	3	3	6.125	0.470218
bcdGFP/bcdGFP;;Dhc6.10/Dhc8.1	0.9772	88.9357	3	3	13.218	2.85349
bcdGFP/bcdGFP;;Dhc6.10/Dhc8.1	0.8845	37.0793	3	3	10.125	0.985207
bcdGFP/bcdGFP;;Dhc6.10/Dhc8.1	0.35675	5.92062	3	3	8.03	0.814344
bcdGFP/bcdGFP;;Dhc6.10/Dhc8.1	0.337	2.47062	3	3	4.558	0.394367
bcdGFP/bcdGFP;;Dhc6.10/Dhc8.1	0.653	-9.07837	3	3	5.512	0.760527
bcdGFP/bcdGFP;;Dhc6.10/Dhc8.1	0.7755	79.5936	3	3	4.128	0.907934
bcdGFP/bcdGFP;;Dhc6.10/Dhc8.1	0.5385	-73.7544	3	3	19.209	0.62912
bcdGFP/bcdGFP;;Dhc6.10/Dhc8.1	0.5182	86.267	3	3	16.54	1.50519
bcdGFP/bcdGFP;;Dhc6.10/Dhc8.1	0.3655	42.5021	3	3	17.966	0.421836
bcdGFP/bcdGFP;;Dhc6.10/Dhc8.1	1.1515	-65.8558	3	3	30.243	1.34463
bcdGFP/bcdGFP;;Dhc6.10/Dhc8.1	0.3342	-88.9729	3	3	22.803	0.502081
bcdGFP/bcdGFP;;Dhc6.10/Dhc8.1	0.301667	-16.8906	3	3	8.598	0.516271
bcdGFP/bcdGFP;;Dhc6.10/Dhc8.1	0.316333	-24.5295	3	3	8.497	0.554
bcdGFP/bcdGFP;;Dhc6.10/Dhc8.1	0.225	-25.3979	3	3	6.53	0.263463
bcdGFP/bcdGFP;;Dhc6.10/Dhc8.1	0.241143	-82.9087	3	3	6.834	0.842444
bcdGFP/bcdGFP;;Dhc6.10/Dhc8.1	0.715857	31.455	3	4	5.321	2.88025
bcdGFP/bcdGFP;;Dhc6.10/Dhc8.1	0.509455	11.7618	3	4	4.931	3.23288
bcdGFP/bcdGFP;;Dhc6.10/Dhc8.1	0.853625	20.8076	3	4	10.8	3.91858
bcdGFP/bcdGFP;;Dhc6.10/Dhc8.1	0.618	24.0527	3	4	4.685	5.41739
bcdGFP/bcdGFP;;Dhc6.10/Dhc8.1	0.555571	-31.9061	3	4	6.73	2.26289
bcdGFP/bcdGFP;;Dhc6.10/Dhc8.1	0.937667	26.3926	3	4	3.204	3.2687
bcdGFP/bcdGFP;;Dhc6.10/Dhc8.1	0.626067	40.5602	3	4	2.47	5.28877
bcdGFP/bcdGFP;;Dhc6.10/Dhc8.1	0.8221	84.1029	3	4	25.148	4.79839
bcdGFP/bcdGFP;;Dhc6.10/Dhc8.1	0.659571	64.2584	3	4	31.719	5.38322
bcdGFP/bcdGFP;;Dhc6.10/Dhc8.1	0.661	44.4838	3	4	14.975	1.88381
bcdGFP/bcdGFP;;Dhc6.10/Dhc8.1	0.618	-4.69434	3	4	13.133	2.88367
bcdGFP/bcdGFP;;Dhc6.10/Dhc8.1	0.297778	-0.905787	3	4	28.842	1.51819
bcdGFP/bcdGFP;;Dhc6.10/Dhc8.1	0.512875	39.6971	3	4	28.23	4.66708
bcdGFP/bcdGFP;;Dhc6.10/Dhc8.1	0.798889	77.0341	3	4	25.755	4.18059
bcdGFP/bcdGFP;;Dhc6.10/Dhc8.1	0.66775	58.2967	3	4	11.934	1.56797
bcdGFP/bcdGFP;;Dhc6.10/Dhc8.1	0.739692	-56.8135	3	4	20.63	5.52281
bcdGFP/bcdGFP;;Dhc6.10/Dhc8.1	0.742857	-55.9767	3	4	32.458	3.00431
bcdGFP/bcdGFP;;Dhc6.10/Dhc8.1	0.579625	9.16573	3	4	4.099	2.69947
bcdGFP/bcdGFP;;Dhc6.10/Dhc8.1	0.6638	19.3824	3	4	8.443	1.87422
bcdGFP/bcdGFP;;Dhc6.10/Dhc8.1	0.521333	12.8114	3	4	8.631	1.78135
bcdGFP/bcdGFP;;Dhc6.10/Dhc8.1	0.5915	11.1417	3	4	6.365	2.07001
bcdGFP/bcdGFP;;Dhc6.10/Dhc8.1	0.868	74.7744	3	4	17.778	3.06146
bcdGFP/bcdGFP;;Dhc6.10/Dhc8.1	0.69825	73.919	3	4	16.297	1.62457
bcdGFP/bcdGFP;;Dhc6.10/Dhc8.1	0.586455	-83.8925	3	4	26.707	3.56222
bcdGFP/bcdGFP;;Dhc6.10/Dhc8.1	0.752125	-52.9627	3	4	31.581	3.49141
bcdGFP/bcdGFP;;Dhc6.10/Dhc8.1	0.785889	20.826	3	4	22.122	4.12341
bcdGFP/bcdGFP;;Dhc6.10/Dhc8.1	0.623333	-27.3939	3	4	3.716	2.07126
bcdGFP/bcdGFP;;Dhc6.10/Dhc8.1	0.725714	59.4245	3	4	20.695	2.9862
bcdGFP/bcdGFP;;Dhc6.10/Dhc8.1	0.711786	-83.746	3	4	34.841	5.80153
bcdGFP/bcdGFP;;Dhc6.10/Dhc8.1	0.6905	75.1185	3	4	6.253	2.36741
bcdGFP/bcdGFP;;Dhc6.10/Dhc8.1	0.610375	-32.9767	3	4	27.374	2.85138
bcdGFP/bcdGFP;;Dhc6.10/Dhc8.1	0.55475	48.6337	3	4	23.755	2.51033
bcdGFP/bcdGFP;;Dhc6.10/Dhc8.1	0.395667	-54.0282	3	4	24.3	1.36537
bcdGFP/bcdGFP;;Dhc6.10/Dhc8.1	0.414333	53.1614	3	4	23.706	0.7322
bcdGFP/bcdGFP;;Dhc6.10/Dhc8.1	0.366	-76.4361	3	4	23.994	1.47103
bcdGFP/bcdGFP;;Dhc6.10/Dhc8.1	0.56925	78.6704	3	4	22.447	1.14022
bcdGFP/bcdGFP;;Dhc6.10/Dhc8.1	0.358333	-56.1313	3	4	29.331	0.622654
bcdGFP/bcdGFP;;Dhc6.10/Dhc8.1	0.688	63.6017	3	4	28.427	1.99726
bcdGFP/bcdGFP;;Dhc6.10/Dhc8.1	0.799714	52.7923	3	4	28.279	3.29086
bcdGFP/bcdGFP;;Dhc6.10/Dhc8.1	0.352714	67.3028	3	4	22.583	1.42539
bcdGFP/bcdGFP;;Dhc6.10/Dhc8.1	0.355286	-23.1119	3	4	23.086	1.38844
bcdGFP/bcdGFP;;Dhc6.10/Dhc8.1	0.35425	-69.0566	3	4	22.21	0.830894
bcdGFP/bcdGFP;;Dhc6.10/Dhc8.1	0.36675	-29.0142	3	4	29.688	0.826759
bcdGFP/bcdGFP;;Dhc6.10/Dhc8.1	0.4062	-59.74	3	4	23.848	1.1589
bcdGFP/bcdGFP;;Dhc6.10/Dhc8.1	0.458667	-44.1404	3	4	22.784	0.801242
bcdGFP/bcdGFP;;Dhc6.10/Dhc8.1	0.763	-35.3123	3	4	30.363	1.77326
bcdGFP/bcdGFP;;Dhc6.10/Dhc8.1	0.405833	-70.8444	3	4	29.281	1.40796
bcdGFP/bcdGFP;;Dhc6.10/Dhc8.1	0.680667	-41.8987	3	4	29.26	1.20243
bcdGFP/bcdGFP;;Dhc6.10/Dhc8.1	0.627	68.5445	3	4	20.355	0.738152
bcdGFP/bcdGFP;;Dhc6.10/Dhc8.1	0.700625	-54.7902	3	4	21.027	3.16873
bcdGFP/bcdGFP;;Dhc6.10/Dhc8.1	0.935	-44.8342	3	4	25.554	2.19982
bcdGFP/bcdGFP;;Dhc6.10/Dhc8.1	1.0045	-76.2231	3	4	29.129	1.12538
bcdGFP/bcdGFP;;Dhc6.10/Dhc8.1	0.49725	30.8641	3	4	28.818	2.26704
bcdGFP/bcdGFP;;Dhc6.10/Dhc8.1	0.624286	-27.9739	3	4	27.968	2.83753
bcdGFP/bcdGFP;;Dhc6.10/Dhc8.1	1.0685	-41.2792	3	4	25.584	2.48435
bcdGFP/bcdGFP;;Dhc6.10/Dhc8.1	0.662	-74.9315	3	4	21.258	1.15781
bcdGFP/bcdGFP;;Dhc6.10/Dhc8.1	0.713667	36.1144	3	4	25.382	1.25891
bcdGFP/bcdGFP;;Dhc6.10/Dhc8.1	0.4755	-12.3516	3	4	28.661	0.560985
bcdGFP/bcdGFP;;Dhc6.10/Dhc8.1	0.2872	-44.4083	3	4	3.863	0.821702
bcdGFP/bcdGFP;;Dhc6.10/Dhc8.1	0.40825	79.0889	3	4	3.304	1.85962
bcdGFP/bcdGFP;;Dhc6.10/Dhc8.1	0.337	-12.3901	3	4	11.005	0.582568
bcdGFP/bcdGFP;;Dhc6.10/Dhc8.1	0.220333	26.4945	3	4	2.673	0.363138
bcdGFP/bcdGFP;;Dhc6.10/Dhc8.1	0.270857	-79.5105	3	4	9.642	1.08208
bcdGFP/bcdGFP;;Dhc6.10/Dhc8.1	0.4475	-55.7986	3	4	11.694	0.528373
bcdGFP/bcdGFP;;Dhc6.10/Dhc8.1	0.2805	27.6533	3	4	3.866	0.329656
bcdGFP/bcdGFP;;Dhc6.10/Dhc8.1	0.345667	79.5258	3	4	9.429	0.605083
bcdGFP/bcdGFP;;Dhc6.10/Dhc8.1	0.478333	1.48611	3	4	3.189	0.848285
bcdGFP/bcdGFP;;Dhc6.10/Dhc8.1	0.54425	14.584	3	4	30.1	1.24305
bcdGFP/bcdGFP;;Dhc6.10/Dhc8.1	0.644667	-45.8347	3	4	30.311	1.06784
bcdGFP/bcdGFP;;Dhc6.10/Dhc8.1	0.28275	77.0119	3	4	26.425	0.662961
bcdGFP/bcdGFP;;Dhc6.10/Dhc8.1	0.36175	-29.5103	3	4	13.272	0.81814
[truncated: 2,872 more rows]
