# Supplementary material for: bicoid mRNA localises to the Drosophila oocyte anterior by random Dynein-mediated transport and anchoring
Source: eLife. 2016 Oct 28;5:e17537. doi: 10.7554/eLife.17537 (PMC5125753; doi:10.7554/eLife.17537)
Supplement: Table 2—source data 1. — Includes the data in: Table 2; Figure 1, panel G. DOI: http://dx.doi.org/10.7554/eLife.17537.010 [file elife-17537-table2-data1.xlsx]

## Sheet: Sheet1
Genotype	Oocyte	Mob/5sec	Immob/5sec	Total	Mob Fract %
bcdGFP+	1	38	99	137	27.7372
bcdGFP+	2	44	206	250	17.6
bcdGFP+	3	23	49	72	31.9444
bcdGFP+	4	24	121	145	16.5517
bcdGFP+	5	71	306	377	18.8329
bcdGFP+Khc27	1	106	128	234	45.2991
bcdGFP+Khc27	2	66	62	128	51.5625
bcdGFP+Khc27	3	123	101	224	54.9107
bcdGFP+Khc27	4	71	119	190	37.3684
bcdGFP+Khc27	5	82	92	174	47.1264
bcdGFP+Khc23	1	18	53	71	25.3521
bcdGFP+Khc23	2	60	136	196	30.6122
bcdGFP+Khc23	3	10	49	59	16.9492
bcdGFP+Khc23	4	81	233	314	25.7962
bcdGFPbcdGFPDhc610-81	1	81	285	366	22.1311
bcdGFPbcdGFPDhc610-81	2	127	481	608	20.8882
bcdGFPbcdGFPDhc610-81	3	96	129	225	42.6667
bcdGFPbcdGFPDhc610-81	4	214	847	1061	20.1697
bcdGFPbcdGFPexu1	1	6	70	76	7.89474
bcdGFPbcdGFPexu1	2	5	74	79	6.32911
bcdGFPbcdGFPexu1	3	67	741	808	8.29208
bcdGFPbcdGFPexu1	4	57	1018	1075	5.30233
