# Supplementary material for: bicoid mRNA localises to the Drosophila oocyte anterior by random Dynein-mediated transport and anchoring
Source: eLife. 2016 Oct 28;5:e17537. doi: 10.7554/eLife.17537 (PMC5125753; doi:10.7554/eLife.17537)
Supplement: Table 3—source data 1. — DOI: http://dx.doi.org/10.7554/eLife.17537.018 [file elife-17537-table3-data1.xlsx]

## Sheet: Sheet1
Time (min)	MCP-GFP - st9						bcd*GFP / Nurse Cells - st9								bcd*GFP - st9 - Mock / 'Raw'									bcd*GFP - st9 - Colcemid / 'Raw'									bcd*GFP - st9 - Mock / Nonspecific component removed										bcd*GFP - st9 - Colcemid / Nonspecific component removed
0	0	0	0	0	0	0	0	0	0	0	0	0	0	0	0	0	0	0	0	0	0	0	0	0	0	0	0	0	0	0	0	0	0	0	0	0	0	0	0	0	0		0	0	0	0	0	0	0
5	0.455	0.536	0.4097	0.5698	0.4717	0.4264	0.5999	0.6436	0.6302	0.7613	0.5432	0.3043	0.5331	0.7136	0.233	0.186646	0.471835	0.34019	0.25	0.278767	0.405634	0.554753	0.174494	0.204531	0.172584	0.234152	0.245064	0.167572	0.302884	0.278686	0.192676	0.326273	-0.0220983	-0.0689811	0.216494	0.0847168	-0.00586552	0.0232329	0.150227	0.299495	-0.0811446		-0.0259983	-0.0579775	0.00365288	0.0145754	-0.0629943	0.0724536	0.0482316
10	0.8292	0.6442	0.5382	0.7036	0.6765	0.5528	0.6143	0.573	0.8297	0.7871	0.8299	0.4661	0.8226	0.3089	0.337	0.281293	0.607429	0.325128	0.329	0.399835	0.403276	0.520574	0.240815	0.198092	0.215793	0.330433	0.32248	0.187379	0.397397	0.325277	0.283581	0.329715	0.0367896	-0.0194184	0.323672	0.0245045	0.0284285	0.099362	0.10281	0.220343	-0.0599771		-0.0732491	-0.0555129	0.0593576	0.0513881	-0.0839838	0.126456	0.054191
15	0.8949	0.6702	0.5068	0.8398	0.7649	0.7021	0.7073	0.7845	0.6826	1.1975	0.5842	0.4739	0.7305	0.4813	0.381	0.318486	0.702956	0.30744	0.291	0.396974	0.418533	0.63123	0.280044	0.278577	0.271199	0.339789	0.284269	0.239674	0.431484	0.316716	0.319626	0.348123	0.0731006	0.0100901	0.395717	-0.000988648	-0.0171838	0.0888144	0.110439	0.323775	-0.0284677		0.000389739	-0.00701064	0.0617863	0.00609945	-0.0386303	0.153758	0.0386435
20	0.8603	0.6925	0.6739	0.7904	0.8298	0.7344	0.6394	0.883	0.6976	1.0016	0.7663	0.5136	0.6738	0.6168	0.385	0.327418	0.639855	0.43342	0.273	0.560995	0.417836	0.587562	0.310137	0.336194	0.27403	0.361346	0.361437	0.30099	0.440015	0.375928	0.242502	0.38385	0.0760085	0.0179428	0.331634	0.12437	-0.0367747	0.252457	0.108724	0.279131	0.000592456		0.0572229	-0.00519043	0.0824766	0.0825681	0.0218777	0.161461	0.0971168
25															0.41	0.415546	0.647931	0.541479	0.369	0.408371	0.556358	0.691589	0.352004	0.318437	0.276404	0.364757	0.340567	0.25556	0.464421	0.380046	0.242901	0.295579	0.100839	0.106587	0.340138	0.233152	0.0599917	0.0993762	0.248107	0.384016	0.0427258		0.0394848	-0.0027582	0.0860375	0.0617268	-0.0237076	0.186202	0.101404
30															0.454	0.412902	0.760603	0.540957	0.33	0.491222	0.598301	0.681729	0.424009	0.363931	0.30325	0.329345	0.351176	0.253247	0.51145	0.366907	0.368834	0.328844	0.145745	0.1043	0.454097	0.233127	0.0210819	0.183093	0.290817	0.374748	0.115474		0.0855334	0.0244871	0.0507388	0.072701	-0.025818	0.233942	0.0885276
35															0.492	0.419272	0.780722	0.594252	0.4	0.52572	0.601164	0.738859	0.400765	0.350747	0.258096	0.353356	0.349057	0.270643	0.369252	0.436042	0.411503	0.417885	0.184096	0.111123	0.475116	0.287334	0.091514	0.21832	0.294295	0.432959	0.0924858		0.0726161	-0.0206871	0.0752436	0.0709138	-0.00805153	0.0912509	0.158511
40															0.587	0.432632	0.864855	0.57927	0.384	0.546429	0.672813	0.721998	0.504532	0.358889	0.266323	0.326672	0.348239	0.312907	0.417429	0.376828	0.448431	0.338762	0.280928	0.125012	0.560712	0.27283	0.0758256	0.239725	0.367126	0.416706	0.197491		0.0811761	-0.0121344	0.0486996	0.0704404	0.0348243	0.140187	0.0992594
45															0.539	0.487844	0.737542	0.707503	0.417	0.617318	0.723911	0.794718	0.536853	0.342805	0.282046	0.323045	0.353056	0.308128	0.45961	0.326946	0.384912	0.328459	0.23287	0.181161	0.43312	0.402809	0.109483	0.311807	0.419366	0.490814	0.230614		0.065309	0.00400012	0.0453698	0.0756528	0.0303174	0.183172	0.0493068
50															0.535	0.487314	0.62249	0.691996	0.381	0.653222	0.77186	0.864127	0.622731	0.364237	0.277395	0.399215	0.420968	0.272393	0.48643	0.42807	0.322807	0.380033	0.22894	0.181118	0.317656	0.387862	0.0734408	0.348697	0.468529	0.561725	0.317899		0.0873036	-0.000412623	0.122633	0.144605	-0.00546486	0.210726	0.151778
55															0.501	0.484297	0.618293	0.745248	0.43	0.728927	0.688746	0.895821	0.618701	0.344929	0.288756	0.37296	0.49729	0.254297	0.563884	0.450907	0.32718	0.407639	0.195811	0.178562	0.314042	0.436767	0.123992	0.425902	0.385275	0.594645	0.314454		0.0681499	0.0113548	0.0964912	0.222199	-0.0234861	0.289531	0.175301
60															0.517	0.544087	0.691598	0.651158	0.421	0.684713	0.701516	0.921627	0.627514	0.396691	0.301178	0.313459	0.526673	0.314153	0.48273	0.385731	0.443262	0.427449	0.212302	0.239565	0.38886	0.347931	0.114917	0.381892	0.398897	0.62167	0.324001		0.120887	0.0242194	0.0366491	0.252441	0.0373513	0.207967	0.109794
[truncated: 2 more columns]
