# Supplementary material for: bicoid mRNA localises to the Drosophila oocyte anterior by random Dynein-mediated transport and anchoring
Source: eLife. 2016 Oct 28;5:e17537. doi: 10.7554/eLife.17537 (PMC5125753; doi:10.7554/eLife.17537)
Supplement: Table 4—source data 1. — Includes the data in: Table 4; Figure 3, panels J-K; Figure 3—figure supplement 1, panels B, F; Figure 4, panel C. DOI: http://dx.doi.org/10.7554/eLife.17537.021 [file elife-17537-table4-data1.xlsx]

## Sheet: Sheet1
Time (min)	bcd*Dendra2 / Nurse cells - st9						bcd*Dendra2 - st9										osk*Dendra2 - st9					hts*Dendra2 - st9										bcd*Dendra2 - st10b								bcd*Dendra2 - st13							bcd*Dendra2 - st14
0	1	1	1	1	1	1	1	1	1	1	1	1	1	1	1	1	1	1	1	1	1	1	1	1	1	1	1	1	1	1	1	1	1	1	1	1	1	1	1	1	1	1	1	1	1	1	1	1	1
5	0.5201	0.1813	0.2795	0.2956	0.5638	0.2418	0.796695	0.629888	0.88157	0.878519	0.711693	0.778626	0.750659	0.847367	0.847044	0.856936	0.9627	1.045	1.0464	1.0142	0.9016	0.799735	0.850791	0.894054	0.910609	0.896384	1.05453	0.858053	0.889857	0.775172	0.854667	0.890961	0.842538	0.732783	0.807096	0.697122	0.660186	0.69375	0.791569	0.6518	0.9332	0.9165	0.7085	0.8941	0.8505	0.8947	1.12253	0.966105	0.945487
10	0.2682	0.2915	0.0927	0.2791	0.2615	0.1449	0.684705	0.528157	0.865734	0.83179	0.656011	0.647866	0.712678	0.751216	0.856072	0.722938	0.898	0.9738	0.99	1.0283	0.8668	0.628732	0.800882	0.763431	0.859427	0.803056	0.948453	0.769607	0.727852	0.61442	0.798242	0.821682	0.627375	0.642786	0.751029	0.488576	0.490059	0.619353	0.672288	0.588	0.8254	0.8863	0.6697	0.7854	0.8212	0.6029	1.20063	0.798774	0.842382
15	0.2415	0.1515	-0.2408	0.0578	0.0051	0.1405	0.766068	0.424328	0.860363	0.765573	0.543903	0.608329	0.598617	0.708499	0.771254	0.6687	0.8453	0.9388	0.982	1.0229	0.9118	0.527445	0.671738	0.666224	0.754717	0.718928	0.884855	0.733558	0.63528	0.491102	0.694349	0.830965	0.453618	0.595339	0.595665	0.477129	0.378363	0.486265	0.588975	0.5005	0.7073	0.8755	0.5236	0.7151	0.7037	0.567	1.10381	0.825997	0.838037
20	0.1403	0.0636	0.1069	0.0192	-0.0846	0.1733	0.738734	0.363908	0.794341	0.730974	0.488476	0.543427	0.53598	0.661383	0.673084	0.55512	0.8132	0.8825	0.942	0.9948	0.882	0.412318	0.657345	0.647503	0.792188	0.662465	0.892843	0.701578	0.669384	0.377322	0.635163	0.750904	0.375531	0.543187	0.558377	0.37065	0.340024	0.401203	0.478138	0.4358	0.634	0.9531	0.5135	0.6876	0.6128	0.582	1.16754	0.72347	0.834315
25							0.658942	0.378387	0.778992	0.704519	0.448526	0.526641	0.468371	0.589679	0.630005	0.523369	0.7692	0.9301	1.0375	0.9837	0.8114	0.341156	0.592291	0.58752	0.705974	0.570256	0.809973	0.687455	0.649646	0.277825	0.55349	0.622695	0.260537	0.331403	0.387286	0.306092	0.266308	0.377592	0.457468	0.3927	0.5128	0.8813	0.4489	0.6783	0.5125	0.5304	1.09066	0.669442	0.795775
30							0.651535	0.275986	0.721357	0.660707	0.438281	0.496362	0.425023	0.540606	0.521374	0.525559	0.7486	0.903	0.9343	0.9358	0.802	0.280517	0.47316	0.485262	0.641423	0.570693	0.728906	0.649548	0.574733	0.261233	0.538316	0.666103	0.241101	0.233542	0.387941	0.215996	0.270305	0.351101	0.421552	0.3504	0.4911	0.8053	0.5001	0.6251	0.4805	0.5684	1.18494	0.603115	0.796406
35							0.56213	0.282796	0.716283	0.656513	0.375071	0.437409	0.337478	0.516422	0.434463	0.500927	0.7268	0.8917	0.9148	0.9042	0.7557	0.225494	0.446421	0.447908	0.601598	0.455161	0.65042	0.636515	0.545007	0.228408	0.505403	0.572303	0.245511	0.148448	0.289757	0.223266	0.218305	0.334547	0.351756	0.3045	0.4563	0.7798	0.3271	0.5745	0.4235	0.5779	1.0175	0.609124	0.788785
40							0.545252	0.273775	0.698597	0.64612	0.361617	0.431098	0.312144	0.484674	0.429809	0.493556	0.7017	0.8698	0.8681	0.9201	0.751	0.159568	0.368836	0.378293	0.542946	0.423206	0.378349	0.611968	0.454266	0.26139	0.471423	0.521623	0.305322	0.115894	0.24129	0.216164	0.161868	0.334195	0.331812	0.2745	0.4839	0.8185	0.3424	0.515	0.3909	0.6114	0.943331	0.526193	0.758419
45							0.514829	0.244798	0.650128	0.60895	0.3121	0.402718	0.282658	0.451877	0.4737	0.476712	0.6913	0.8153	0.8167	0.89	0.7656	0.124542	0.296852	0.352249	0.508018	0.384808	0.413527	0.564855	0.484549	0.201983	0.457123	0.475589	0.222165	0.1446	0.190358	0.160174	0.178708	0.309054	0.315542	0.2714	0.4217	0.7083	0.3041	0.5003	0.3523	0.5512	0.76385	0.48932	0.681371
50							0.517785	0.246203	0.646047	0.571883	0.303793	0.369132	0.286672	0.439724	0.432776	0.443914	0.6524	0.7652	0.7677	0.8778	0.7383	0.105219	0.263047	0.313854	0.496201	0.389951	0.4008	0.555951	0.471569	0.16492	0.448794	0.351243	0.279282	0.151623	0.154983	0.190764	0.144779	0.294429	0.348215	0.2531	0.3678	0.7987	0.3031	0.4011	0.3271	0.5302	0.767661	0.457753	0.702618
55							0.465303	0.239778	0.63439	0.569764	0.263506	0.295981	0.212694	0.422352	0.565247	0.466403	0.6157	0.7014	0.7269	0.8279	0.7212	0.0893859	0.231779	0.283927	0.479263	0.338763	0.388197	0.532604	0.422207	0.162575	0.385766	0.277614	0.261262	0.14974	0.146427	0.188413	0.13653	0.284692	0.280861	0.2296	0.3505	0.7012	0.3302	0.4423	0.3094	0.5508	0.768697	0.433268	0.65457
# Non specific component has been removed and values have been normalised for the MS2/MCP dissociation of 0.0017/sec (Lowary, 1987)
[truncated: 111 more columns]
