# Supplementary material for: bicoid mRNA localises to the Drosophila oocyte anterior by random Dynein-mediated transport and anchoring
Source: eLife. 2016 Oct 28;5:e17537. doi: 10.7554/eLife.17537 (PMC5125753; doi:10.7554/eLife.17537)
Supplement: Table 5—source data 1. — Includes the data in: Table 5; Figure 7, panels G–K; Figure 8, panles A–D. DOI: http://dx.doi.org/10.7554/eLife.17537.035 [file elife-17537-table5-data1.xlsx]

## Sheet: Sheet1
Labelling system	Genotype_Sample	Idate	Filename	Oocyte	Area	Object	Distance	X profile FWHM (nm)	X-profile Lorentzian fit r2	Y profile FWHM (nm)	Y-profile Lorentzian fit r2	ratio XY profiles	Particle Size (nm)	Particle Summed fluorescence (a.u.)
MS2/MCP	bcdGFP_st9	2015-05-01	Profiler (radius=10) : wholeEgg_0003.tab.txt	1	1	1	3.011	156	0.985	103	0.844	1.51456	129.5	NA
MS2/MCP	bcdGFP_st9	2015-05-01	Profiler (radius=10) : wholeEgg_0003.tab.txt	1	1	8	6.629	176	0.932	101	0.94	1.74257	138.5	NA
MS2/MCP	bcdGFP_st9	2015-05-01	Profiler (radius=10) : wholeEgg_0003.tab.txt	1	1	16	2.637	178	0.984	140	0.847	1.27143	159	NA
MS2/MCP	bcdGFP_st9	2015-05-01	Profiler (radius=10) : wholeEgg_0003.tab.txt	1	1	21	1.314	145	0.983	123	0.926	1.17886	134	NA
MS2/MCP	bcdGFP_st9	2015-05-01	Profiler (radius=10) : wholeEgg_0003.tab.txt	1	1	26	6.378	112	0.975	109	0.992	1.02752	110.5	NA
MS2/MCP	bcdGFP_st9	2015-05-01	Profiler (radius=10) : wholeEgg_0003.tab.txt	1	1	29	3.71	159	0.936	117	0.978	1.35897	138	NA
MS2/MCP	bcdGFP_st9	2015-05-01	Profiler (radius=10) : wholeEgg_0003.tab.txt	1	1	31	3.165	114	0.807	109	0.951	1.04587	111.5	NA
MS2/MCP	bcdGFP_st9	2015-05-01	Profiler (radius=10) : wholeEgg_0003.tab.txt	1	1	32	3.752	117	0.817	73	0.921	1.60274	95	NA
MS2/MCP	bcdGFP_st9	2015-05-01	Profiler (radius=10) : wholeEgg_0003.tab.txt	1	1	39	1.738	109	0.936	106	0.993	1.0283	107.5	NA
MS2/MCP	bcdGFP_st9	2015-05-01	Profiler (radius=10) : wholeEgg_0003.tab.txt	1	1	43	12.66	115	0.971	105	0.995	1.09524	110	NA
MS2/MCP	bcdGFP_st9	2015-05-01	Profiler (radius=10) : wholeEgg_0003.tab.txt	1	1	45	6.335	116	0.973	117	0.932	0.991453	116.5	NA
MS2/MCP	bcdGFP_st9	2015-05-01	Profiler (radius=10) : wholeEgg_0003.tab.txt	1	1	48	3.02	137	0.982	118	0.889	1.16102	127.5	NA
MS2/MCP	bcdGFP_st9	2015-05-01	Profiler (radius=10) : wholeEgg_0003.tab.txt	1	1	60	1.543	125	0.98	121	0.97	1.03306	123	NA
MS2/MCP	bcdGFP_st9	2015-05-01	Profiler (radius=10) : wholeEgg_0003.tab.txt	1	1	76	3.136	104	0.932	74	0.833	1.40541	89	NA
MS2/MCP	bcdGFP_st9	2015-05-01	Profiler (radius=10) : wholeEgg_0003.tab.txt	1	1	88	0.95	85	0.894	101	0.945	0.841584	93	NA
MS2/MCP	bcdGFP_st9	2015-05-01	Profiler (radius=10) : wholeEgg_0003.tab.txt	1	1	89	8.126	128	0.932	101	0.986	1.26733	114.5	NA
MS2/MCP	bcdGFP_st9	2015-05-01	Profiler (radius=10) : wholeEgg_0003.tab.txt	1	1	91	1.799	105	0.949	113	0.852	0.929204	109	NA
MS2/MCP	bcdGFP_st9	2015-05-01	Profiler (radius=10) : wholeEgg_0003.tab.txt	1	1	97	4.156	126	0.984	104	0.973	1.21154	115	NA
MS2/MCP	bcdGFP_st9	2015-05-01	Profiler (radius=10) : wholeEgg_0003.tab.txt	1	1	99	8.808	99	0.986	121	0.961	0.818182	110	NA
MS2/MCP	bcdGFP_st9	2015-05-01	Profiler (radius=10) : wholeEgg_0003.tab.txt	1	1	101	2.828	106	0.847	100	0.972	1.06	103	NA
MS2/MCP	bcdGFP_st9	2015-05-01	Profiler (radius=10) : wholeEgg_0003.tab.txt	1	1	102	1.863	131	0.947	210	0.902	0.62381	170.5	NA
MS2/MCP	bcdGFP_st9	2015-05-01	Profiler (radius=10) : wholeEgg_0003.tab.txt	1	1	103	6.852	174	0.957	93	0.987	1.87097	133.5	NA
MS2/MCP	bcdGFP_st9	2015-05-01	Profiler (radius=10) : wholeEgg_0003.tab.txt	1	1	104	9.905	179	0.899	158	0.969	1.13291	168.5	NA
MS2/MCP	bcdGFP_st9	2015-05-01	Profiler (radius=10) : wholeEgg_0003.tab.txt	1	1	110	6.277	142	0.89	106	0.821	1.33962	124	NA
MS2/MCP	bcdGFP_st9	2015-05-01	Profiler (radius=10) : wholeEgg_0003.tab.txt	1	1	112	6.326	79	0.928	81	0.962	0.975309	80	NA
MS2/MCP	bcdGFP_st9	2015-05-01	Profiler (radius=10) : wholeEgg_0003.tab.txt	1	1	114	5.447	102	0.939	93	0.94	1.09677	97.5	NA
MS2/MCP	bcdGFP_st9	2015-05-01	Profiler (radius=10) : wholeEgg_0003.tab.txt	1	1	118	0.947	139	0.97	98	0.864	1.41837	118.5	NA
MS2/MCP	bcdGFP_st9	2015-05-01	Profiler (radius=10) : wholeEgg_0003.tab.txt	1	1	119	7.91	134	0.89	116	0.935	1.15517	125	NA
MS2/MCP	bcdGFP_st9	2015-05-01	Profiler (radius=10) : wholeEgg_0003.tab.txt	1	1	131	1.377	101	0.916	174	0.937	0.58046	137.5	NA
MS2/MCP	bcdGFP_st9	2015-05-01	Profiler (radius=10) : wholeEgg_0003.tab.txt	1	1	140	8.395	105	0.898	109	0.975	0.963303	107	NA
MS2/MCP	bcdGFP_st9	2015-05-01	Profiler (radius=10) : wholeEgg_0003.tab.txt	1	1	142	4.877	56	0.899	55	0.918	1.01818	55.5	NA
MS2/MCP	bcdGFP_st9	2015-05-01	Profiler (radius=10) : wholeEgg_0003.tab.txt	1	1	147	12.487	91	0.93	92	0.961	0.98913	91.5	NA
MS2/MCP	bcdGFP_st9	2015-05-01	Profiler (radius=10) : wholeEgg_0003.tab.txt	1	1	148	7.437	92	0.824	94	0.847	0.978723	93	NA
MS2/MCP	bcdGFP_st9	2015-05-01	Profiler (radius=10) : wholeEgg_0003.tab.txt	1	1	150	6.259	89	0.84	82	0.909	1.08537	85.5	NA
MS2/MCP	bcdGFP_st9	2015-05-01	Profiler (radius=10) : wholeEgg_0003.tab.txt	1	1	151	1.3	98	0.894	147	0.934	0.666667	122.5	NA
MS2/MCP	bcdGFP_st9	2015-05-01	Profiler (radius=10) : wholeEgg_0003.tab.txt	1	1	154	9.083	124	0.907	78	0.958	1.58974	101	NA
MS2/MCP	bcdGFP_st9	2015-05-01	Profiler (radius=10) : wholeEgg_0003.tab.txt	1	1	160	5.2	107	0.874	84	0.894	1.27381	95.5	NA
MS2/MCP	bcdGFP_st9	2015-05-01	Profiler (radius=10) : wholeEgg_0003.tab.txt	1	1	162	5.379	70	0.938	93	0.965	0.752688	81.5	NA
MS2/MCP	bcdGFP_st9	2015-05-01	Profiler (radius=10) : wholeEgg_0003.tab.txt	1	1	169	3.588	67	0.918	67	0.876	1	67	NA
MS2/MCP	bcdGFP_st9	2015-05-01	Profiler (radius=10) : wholeEgg_0003.tab.txt	1	1	170	3.276	139	0.832	76	0.868	1.82895	107.5	NA
MS2/MCP	bcdGFP_st9	2015-05-01	Profiler (radius=10) : wholeEgg_0003.tab.txt	1	1	173	5.269	80	0.905	101	0.926	0.792079	90.5	NA
MS2/MCP	bcdGFP_st9	2015-05-01	Profiler (radius=10) : wholeEgg_0003.tab.txt	1	1	177	2.289	86	0.984	56	0.915	1.53571	71	NA
MS2/MCP	bcdGFP_st9	2015-05-01	Profiler (radius=10) : wholeEgg_0003.tab.txt	1	1	182	12.579	107	0.974	77	0.873	1.38961	92	NA
MS2/MCP	bcdGFP_st9	2015-05-01	Profiler (radius=10) : wholeEgg_0003.tab.txt	1	1	184	4.564	105	0.968	139	0.923	0.755396	122	NA
MS2/MCP	bcdGFP_st9	2015-05-01	Profiler (radius=10) : wholeEgg_0003.tab.txt	1	1	206	5.965	77	0.952	89	0.943	0.865169	83	NA
MS2/MCP	bcdGFP_st9	2015-05-01	Profiler (radius=10) : wholeEgg_0003.tab.txt	1	1	213	12.153	83	0.962	94	0.817	0.882979	88.5	NA
MS2/MCP	bcdGFP_st9	2015-05-01	Profiler (radius=10) : wholeEgg_0003.tab.txt	1	1	250	10.863	98	0.906	87	0.848	1.12644	92.5	NA
MS2/MCP	bcdGFP_st9	2015-05-01	Profiler (radius=10) : wholeEgg_0003.tab.txt	1	1	312	12.402	56	0.887	87	0.973	0.643678	71.5	NA
MS2/MCP	bcdGFP_st9	2015-05-01	Profiler (radius=10) : wholeEgg_0005.tab.txt	1	2	3	10.853	176	0.989	154	0.99	1.14286	165	NA
MS2/MCP	bcdGFP_st9	2015-05-01	Profiler (radius=10) : wholeEgg_0005.tab.txt	1	2	18	2.629	108	0.983	139	0.928	0.776978	123.5	NA
MS2/MCP	bcdGFP_st9	2015-05-01	Profiler (radius=10) : wholeEgg_0005.tab.txt	1	2	19	4.522	118	0.872	210	0.871	0.561905	164	NA
MS2/MCP	bcdGFP_st9	2015-05-01	Profiler (radius=10) : wholeEgg_0005.tab.txt	1	2	24	6.853	131	0.986	126	0.939	1.03968	128.5	NA
MS2/MCP	bcdGFP_st9	2015-05-01	Profiler (radius=10) : wholeEgg_0005.tab.txt	1	2	27	5.493	103	0.958	149	0.841	0.691275	126	NA
MS2/MCP	bcdGFP_st9	2015-05-01	Profiler (radius=10) : wholeEgg_0005.tab.txt	1	2	33	3.812	94	0.99	106	0.985	0.886792	100	NA
MS2/MCP	bcdGFP_st9	2015-05-01	Profiler (radius=10) : wholeEgg_0005.tab.txt	1	2	35	7.262	126	0.958	151	0.971	0.834437	138.5	NA
MS2/MCP	bcdGFP_st9	2015-05-01	Profiler (radius=10) : wholeEgg_0005.tab.txt	1	2	37	7.735	136	0.894	111	0.964	1.22523	123.5	NA
MS2/MCP	bcdGFP_st9	2015-05-01	Profiler (radius=10) : wholeEgg_0005.tab.txt	1	2	46	6.617	136	0.986	115	0.918	1.18261	125.5	NA
MS2/MCP	bcdGFP_st9	2015-05-01	Profiler (radius=10) : wholeEgg_0005.tab.txt	1	2	55	1.897	113	0.95	130	0.952	0.869231	121.5	NA
MS2/MCP	bcdGFP_st9	2015-05-01	Profiler (radius=10) : wholeEgg_0005.tab.txt	1	2	66	5.696	117	0.857	114	0.978	1.02632	115.5	NA
MS2/MCP	bcdGFP_st9	2015-05-01	Profiler (radius=10) : wholeEgg_0005.tab.txt	1	2	71	5.872	110	0.984	159	0.957	0.691824	134.5	NA
MS2/MCP	bcdGFP_st9	2015-05-01	Profiler (radius=10) : wholeEgg_0005.tab.txt	1	2	72	2.663	100	0.844	113	0.954	0.884956	106.5	NA
MS2/MCP	bcdGFP_st9	2015-05-01	Profiler (radius=10) : wholeEgg_0005.tab.txt	1	2	83	3.424	92	0.963	117	0.966	0.786325	104.5	NA
MS2/MCP	bcdGFP_st9	2015-05-01	Profiler (radius=10) : wholeEgg_0005.tab.txt	1	2	93	5.38	121	0.87	152	0.968	0.796053	136.5	NA
MS2/MCP	bcdGFP_st9	2015-05-01	Profiler (radius=10) : wholeEgg_0005.tab.txt	1	2	99	8.895	95	0.952	115	0.956	0.826087	105	NA
MS2/MCP	bcdGFP_st9	2015-05-01	Profiler (radius=10) : wholeEgg_0005.tab.txt	1	2	105	10.072	138	0.983	117	0.958	1.17949	127.5	NA
MS2/MCP	bcdGFP_st9	2015-05-01	Profiler (radius=10) : wholeEgg_0005.tab.txt	1	2	112	10.119	134	0.976	99	0.971	1.35354	116.5	NA
MS2/MCP	bcdGFP_st9	2015-05-01	Profiler (radius=10) : wholeEgg_0005.tab.txt	1	2	118	4.391	172	0.929	152	0.937	1.13158	162	NA
MS2/MCP	bcdGFP_st9	2015-05-01	Profiler (radius=10) : wholeEgg_0005.tab.txt	1	2	129	3.21	89	0.881	87	0.972	1.02299	88	NA
MS2/MCP	bcdGFP_st9	2015-05-01	Profiler (radius=10) : wholeEgg_0005.tab.txt	1	2	135	6.314	137	0.87	102	0.98	1.34314	119.5	NA
MS2/MCP	bcdGFP_st9	2015-05-01	Profiler (radius=10) : wholeEgg_0005.tab.txt	1	2	144	1.67	166	0.949	193	0.972	0.860104	179.5	NA
MS2/MCP	bcdGFP_st9	2015-05-01	Profiler (radius=10) : wholeEgg_0005.tab.txt	1	2	154	4.72	136	0.979	111	0.975	1.22523	123.5	NA
MS2/MCP	bcdGFP_st9	2015-05-01	Profiler (radius=10) : wholeEgg_0005.tab.txt	1	2	162	1.483	147	0.955	103	0.934	1.42718	125	NA
MS2/MCP	bcdGFP_st9	2015-05-01	Profiler (radius=10) : wholeEgg_0005.tab.txt	1	2	173	4.92	104	0.97	107	0.836	0.971963	105.5	NA
MS2/MCP	bcdGFP_st9	2015-05-01	Profiler (radius=10) : wholeEgg_0005.tab.txt	1	2	184	4.845	81	0.886	65	0.835	1.24615	73	NA
MS2/MCP	bcdGFP_st9	2015-05-01	Profiler (radius=10) : wholeEgg_0005.tab.txt	1	2	211	2.757	83	0.917	69	0.899	1.2029	76	NA
MS2/MCP	bcdGFP_st9	2015-05-01	Profiler (radius=10) : wholeEgg_0005.tab.txt	1	2	229	3.16	127	0.909	121	0.862	1.04959	124	NA
MS2/MCP	bcdGFP_st9	2015-05-01	Profiler (radius=10) : wholeEgg_0005.tab.txt	1	2	237	0.365	98	0.894	75	0.936	1.30667	86.5	NA
MS2/MCP	bcdGFP_st9	2015-05-01	Profiler (radius=10) : wholeEgg_0005.tab.txt	1	2	251	2.991	103	0.962	109	0.951	0.944954	106	NA
MS2/MCP	bcdGFP_st9	2015-05-01	Profiler (radius=10) : wholeEgg_0005.tab.txt	1	2	262	11.393	134	0.977	97	0.961	1.38144	115.5	NA
MS2/MCP	bcdGFP_st9	2015-05-01	Profiler (radius=10) : wholeEgg_0005.tab.txt	1	2	266	2.91	67	0.823	47	0.837	1.42553	57	NA
MS2/MCP	bcdGFP_st9	2015-05-01	Profiler (radius=10) : wholeEgg_0005.tab.txt	1	2	272	8.698	79	0.851	133	0.911	0.593985	106	NA
MS2/MCP	bcdGFP_st9	2015-05-01	Profiler (radius=10) : wholeEgg_0005.tab.txt	1	2	273	10.081	103	0.959	151	0.915	0.682119	127	NA
MS2/MCP	bcdGFP_st9	2015-05-01	Profiler (radius=10) : wholeEgg_0005.tab.txt	1	2	277	8.59	78	0.908	144	0.933	0.541667	111	NA
MS2/MCP	bcdGFP_st9	2015-05-01	Profiler (radius=10) : wholeEgg_0005.tab.txt	1	2	284	9.721	103	0.917	129	0.917	0.79845	116	NA
MS2/MCP	bcdGFP_st9	2015-05-01	Profiler (radius=10) : wholeEgg_0005.tab.txt	1	2	304	10.274	75	0.953	108	0.934	0.694444	91.5	NA
MS2/MCP	bcdGFP_st9	2015-05-01	Profiler (radius=10) : wholeEgg_0005.tab.txt	1	2	321	8.51	117	0.97	76	0.936	1.53947	96.5	NA
MS2/MCP	bcdGFP_st9	2015-05-01	Profiler (radius=10) : wholeEgg_0005.tab.txt	1	2	388	7.729	81	0.928	99	0.833	0.818182	90	NA
MS2/MCP	bcdGFP_st9	2015-05-01	Profiler (radius=10) : wholeEgg_0011.tab.txt	1	4	2	5.377	161	0.984	135	0.894	1.19259	148	NA
MS2/MCP	bcdGFP_st9	2015-05-01	Profiler (radius=10) : wholeEgg_0011.tab.txt	1	4	11	3.726	106	0.97	103	0.987	1.02913	104.5	NA
MS2/MCP	bcdGFP_st9	2015-05-01	Profiler (radius=10) : wholeEgg_0011.tab.txt	1	4	20	12.663	215	0.908	125	0.982	1.72	170	NA
MS2/MCP	bcdGFP_st9	2015-05-01	Profiler (radius=10) : wholeEgg_0011.tab.txt	1	4	62	7.382	137	0.984	159	0.988	0.861635	148	NA
MS2/MCP	bcdGFP_st9	2015-05-01	Profiler (radius=10) : wholeEgg_0011.tab.txt	1	4	64	5.791	103	0.933	104	0.982	0.990385	103.5	NA
MS2/MCP	bcdGFP_st9	2015-05-01	Profiler (radius=10) : wholeEgg_0011.tab.txt	1	4	68	1.592	187	0.971	273	0.883	0.684982	230	NA
MS2/MCP	bcdGFP_st9	2015-05-01	Profiler (radius=10) : wholeEgg_0011.tab.txt	1	4	80	2.726	118	0.991	111	0.951	1.06306	114.5	NA
MS2/MCP	bcdGFP_st9	2015-05-01	Profiler (radius=10) : wholeEgg_0011.tab.txt	1	4	87	3.223	115	0.942	91	0.905	1.26374	103	NA
MS2/MCP	bcdGFP_st9	2015-05-01	Profiler (radius=10) : wholeEgg_0011.tab.txt	1	4	93	1.628	142	0.866	98	0.996	1.44898	120	NA
MS2/MCP	bcdGFP_st9	2015-05-01	Profiler (radius=10) : wholeEgg_0011.tab.txt	1	4	103	10.859	99	0.991	91	0.99	1.08791	95	NA
MS2/MCP	bcdGFP_st9	2015-05-01	Profiler (radius=10) : wholeEgg_0011.tab.txt	1	4	111	4.028	117	0.966	100	0.923	1.17	108.5	NA
MS2/MCP	bcdGFP_st9	2015-05-01	Profiler (radius=10) : wholeEgg_0011.tab.txt	1	4	116	10.634	120	0.906	104	0.965	1.15385	112	NA
MS2/MCP	bcdGFP_st9	2015-05-01	Profiler (radius=10) : wholeEgg_0011.tab.txt	1	4	118	6.898	118	0.952	139	0.891	0.848921	128.5	NA
MS2/MCP	bcdGFP_st9	2015-05-01	Profiler (radius=10) : wholeEgg_0011.tab.txt	1	4	120	5.246	76	0.96	93	0.982	0.817204	84.5	NA
MS2/MCP	bcdGFP_st9	2015-05-01	Profiler (radius=10) : wholeEgg_0011.tab.txt	1	4	128	3.599	96	0.98	77	0.935	1.24675	86.5	NA
MS2/MCP	bcdGFP_st9	2015-05-01	Profiler (radius=10) : wholeEgg_0011.tab.txt	1	4	132	3.272	106	0.916	107	0.991	0.990654	106.5	NA
MS2/MCP	bcdGFP_st9	2015-05-01	Profiler (radius=10) : wholeEgg_0011.tab.txt	1	4	137	3.39	107	0.849	105	0.951	1.01905	106	NA
MS2/MCP	bcdGFP_st9	2015-05-01	Profiler (radius=10) : wholeEgg_0011.tab.txt	1	4	138	9.855	90	0.992	79	0.975	1.13924	84.5	NA
MS2/MCP	bcdGFP_st9	2015-05-01	Profiler (radius=10) : wholeEgg_0011.tab.txt	1	4	140	12.853	193	0.946	157	0.895	1.2293	175	NA
MS2/MCP	bcdGFP_st9	2015-05-01	Profiler (radius=10) : wholeEgg_0011.tab.txt	1	4	141	6.876	91	0.941	121	0.973	0.752066	106	NA
MS2/MCP	bcdGFP_st9	2015-05-01	Profiler (radius=10) : wholeEgg_0011.tab.txt	1	4	151	5.419	145	0.899	141	0.928	1.02837	143	NA
MS2/MCP	bcdGFP_st9	2015-05-01	Profiler (radius=10) : wholeEgg_0011.tab.txt	1	4	157	2.237	129	0.963	100	0.901	1.29	114.5	NA
MS2/MCP	bcdGFP_st9	2015-05-01	Profiler (radius=10) : wholeEgg_0011.tab.txt	1	4	186	11.044	143	0.894	116	0.968	1.23276	129.5	NA
MS2/MCP	bcdGFP_st9	2015-05-01	Profiler (radius=10) : wholeEgg_0011.tab.txt	1	4	198	3.463	210	0.964	125	0.962	1.68	167.5	NA
MS2/MCP	bcdGFP_st9	2015-05-01	Profiler (radius=10) : wholeEgg_0011.tab.txt	1	4	206	8.703	169	0.964	88	0.846	1.92045	128.5	NA
MS2/MCP	bcdGFP_st9	2015-05-01	Profiler (radius=10) : wholeEgg_0011.tab.txt	1	4	210	2.795	106	0.956	83	0.977	1.27711	94.5	NA
MS2/MCP	bcdGFP_st9	2015-05-01	Profiler (radius=10) : wholeEgg_0011.tab.txt	1	4	213	7.317	99	0.95	129	0.95	0.767442	114	NA
MS2/MCP	bcdGFP_st9	2015-05-01	Profiler (radius=10) : wholeEgg_0011.tab.txt	1	4	223	12.218	118	0.976	101	0.96	1.16832	109.5	NA
MS2/MCP	bcdGFP_st9	2015-05-01	Profiler (radius=10) : wholeEgg_0011.tab.txt	1	4	224	6.233	111	0.963	95	0.984	1.16842	103	NA
MS2/MCP	bcdGFP_st9	2015-05-01	Profiler (radius=10) : wholeEgg_0011.tab.txt	1	4	228	8.512	104	0.89	119	0.867	0.87395	111.5	NA
MS2/MCP	bcdGFP_st9	2015-05-01	Profiler (radius=10) : wholeEgg_0011.tab.txt	1	4	232	11.882	105	0.917	116	0.958	0.905172	110.5	NA
MS2/MCP	bcdGFP_st9	2015-05-01	Profiler (radius=10) : wholeEgg_0011.tab.txt	1	4	239	9.005	98	0.947	146	0.845	0.671233	122	NA
MS2/MCP	bcdGFP_st9	2015-05-01	Profiler (radius=10) : wholeEgg_0011.tab.txt	1	4	245	11.383	91	0.951	104	0.881	0.875	97.5	NA
MS2/MCP	bcdGFP_st9	2015-05-01	Profiler (radius=10) : wholeEgg_0011.tab.txt	1	4	249	7.983	122	0.949	76	0.841	1.60526	99	NA
MS2/MCP	bcdGFP_st9	2015-05-01	Profiler (radius=10) : wholeEgg_0011.tab.txt	1	4	268	11.505	113	0.9	85	0.983	1.32941	99	NA
MS2/MCP	bcdGFP_st9	2015-05-01	Profiler (radius=10) : wholeEgg_0011.tab.txt	1	4	304	12.35	99	0.93	64	0.874	1.54688	81.5	NA
MS2/MCP	bcdGFP_st9	2015-05-01	Profiler (radius=10) : wholeEgg_0011.tab.txt	1	4	332	11.682	87	0.879	83	0.891	1.04819	85	NA
MS2/MCP	bcdGFP_st9	2015-05-01	Profiler (radius=10) : wholeEgg_0014.tab.txt	1	5	2	5.749	146	0.967	135	0.988	1.08148	140.5	NA
MS2/MCP	bcdGFP_st9	2015-05-01	Profiler (radius=10) : wholeEgg_0014.tab.txt	1	5	22	4.45	129	0.931	106	0.964	1.21698	117.5	NA
MS2/MCP	bcdGFP_st9	2015-05-01	Profiler (radius=10) : wholeEgg_0014.tab.txt	1	5	57	2.85	97	0.951	70	0.977	1.38571	83.5	NA
MS2/MCP	bcdGFP_st9	2015-05-01	Profiler (radius=10) : wholeEgg_0014.tab.txt	1	5	76	5.613	127	0.833	91	0.956	1.3956	109	NA
MS2/MCP	bcdGFP_st9	2015-05-01	Profiler (radius=10) : wholeEgg_0014.tab.txt	1	5	79	4.665	212	0.851	116	0.857	1.82759	164	NA
MS2/MCP	bcdGFP_st9	2015-05-01	Profiler (radius=10) : wholeEgg_0014.tab.txt	1	5	84	6.157	181	0.881	149	0.88	1.21477	165	NA
MS2/MCP	bcdGFP_st9	2015-05-01	Profiler (radius=10) : wholeEgg_0014.tab.txt	1	5	86	4.885	149	0.872	109	0.913	1.36697	129	NA
MS2/MCP	bcdGFP_st9	2015-05-01	Profiler (radius=10) : wholeEgg_0014.tab.txt	1	5	87	5.201	104	0.924	187	0.832	0.55615	145.5	NA
MS2/MCP	bcdGFP_st9	2015-05-01	Profiler (radius=10) : wholeEgg_0014.tab.txt	1	5	92	4.936	191	0.828	136	0.873	1.40441	163.5	NA
MS2/MCP	bcdGFP_st9	2015-05-01	Profiler (radius=10) : wholeEgg_0014.tab.txt	1	5	102	2.728	90	0.862	106	0.963	0.849057	98	NA
MS2/MCP	bcdGFP_st9	2015-05-01	Profiler (radius=10) : wholeEgg_0014.tab.txt	1	5	110	3.27	206	0.938	113	0.873	1.82301	159.5	NA
MS2/MCP	bcdGFP_st9	2015-05-01	Profiler (radius=10) : wholeEgg_0014.tab.txt	1	5	123	4.692	190	0.894	162	0.956	1.17284	176	NA
MS2/MCP	bcdGFP_st9	2015-05-01	Profiler (radius=10) : wholeEgg_0014.tab.txt	1	5	124	4.616	116	0.972	151	0.898	0.768212	133.5	NA
MS2/MCP	bcdGFP_st9	2015-05-01	Profiler (radius=10) : wholeEgg_0014.tab.txt	1	5	131	5.282	128	0.964	88	0.889	1.45455	108	NA
MS2/MCP	bcdGFP_st9	2015-05-01	Profiler (radius=10) : wholeEgg_0014.tab.txt	1	5	192	9.983	116	0.978	102	0.909	1.13725	109	NA
MS2/MCP	bcdGFP_st9	2015-05-01	Profiler (radius=10) : wholeEgg_0014.tab.txt	1	5	193	5.275	79	0.928	87	0.954	0.908046	83	NA
MS2/MCP	bcdGFP_st9	2015-05-01	Profiler (radius=10) : wholeEgg_0014.tab.txt	1	5	209	3.897	111	0.947	116	0.906	0.956897	113.5	NA
MS2/MCP	bcdGFP_st9	2015-05-01	Profiler (radius=10, n=0) : wholeEgg_0016.tab.txt	2	1	9	1.908	184	0.846	125	0.83	1.472	154.5	NA
MS2/MCP	bcdGFP_st9	2015-05-01	Profiler (radius=10, n=0) : wholeEgg_0016.tab.txt	2	1	55	2.719	174	0.945	263	0.899	0.661597	218.5	NA
MS2/MCP	bcdGFP_st9	2015-05-01	Profiler (radius=10, n=0) : wholeEgg_0016.tab.txt	2	1	66	1.88	261	0.892	176	0.928	1.48295	218.5	NA
MS2/MCP	bcdGFP_st9	2015-05-01	Profiler (radius=10, n=0) : wholeEgg_0016.tab.txt	2	1	87	2.851	70	0.867	89	0.897	0.786517	79.5	NA
MS2/MCP	bcdGFP_st9	2015-05-01	Profiler (radius=10, n=0) : wholeEgg_0016.tab.txt	2	1	90	4.445	86	0.89	76	0.841	1.13158	81	NA
MS2/MCP	bcdGFP_st9	2015-05-01	Profiler (radius=10, n=0) : wholeEgg_0018.tab.txt	2	2	55	1.042	90	0.966	88	0.932	1.02273	89	NA
MS2/MCP	bcdGFP_st9	2015-05-01	Profiler (radius=10, n=0) : wholeEgg_0018.tab.txt	2	2	90	2.844	233	0.934	190	0.912	1.22632	211.5	NA
MS2/MCP	bcdGFP_st9	2015-05-01	Profiler (radius=10, n=0) : wholeEgg_0020.tab.txt	2	2	64	2.358	171	0.949	146	0.954	1.17123	158.5	NA
MS2/MCP	bcdGFP_st9	2015-05-01	Profiler (radius=10, n=0) : wholeEgg_0020.tab.txt	2	2	65	4.602	120	0.961	121	0.883	0.991736	120.5	NA
MS2/MCP	bcdGFP_st9	2015-05-01	Profiler (radius=10, n=0) : wholeEgg_0020.tab.txt	2	2	79	0.866	69	0.815	98	0.919	0.704082	83.5	NA
MS2/MCP	bcdGFP_st9	2015-05-01	Profiler (radius=10, n=0) : wholeEgg_0020.tab.txt	2	2	100	1.261	90	0.903	79	0.876	1.13924	84.5	NA
MS2/MCP	bcdGFP_st9	2015-05-01	Profiler (radius=10, n=0) : wholeEgg_0020.tab.txt	2	2	106	6.406	124	0.931	106	0.957	1.16981	115	NA
MS2/MCP	bcdGFP_st9	2015-05-01	Profiler (radius=10, n=0) : wholeEgg_0020.tab.txt	2	2	164	8.136	138	0.926	77	0.82	1.79221	107.5	NA
MS2/MCP	bcdGFP_st9	2015-05-01	Profiler (radius=10, n=0) : wholeEgg_0022.tab.txt	2	3	40	1.816	137	0.823	173	0.841	0.791908	155	NA
MS2/MCP	bcdGFP_st9	2015-05-01	Profiler (radius=10, n=0) : wholeEgg_0022.tab.txt	2	3	69	0.927	153	0.987	117	0.821	1.30769	135	NA
MS2/MCP	bcdGFP_st9	2015-05-01	Profiler (radius=10, n=0) : wholeEgg_0022.tab.txt	2	3	101	2.392	128	0.965	215	0.929	0.595349	171.5	NA
MS2/MCP	bcdGFP_st9	2015-05-01	Profiler (radius=10, n=0) : wholeEgg_0022.tab.txt	2	3	108	0.239	250	0.91	157	0.953	1.59236	203.5	NA
MS2/MCP	bcdGFP_st9	2015-05-01	Profiler (radius=10, n=0) : wholeEgg_0033.tab.txt	3	1	4	0.772	149	0.98	120	0.96	1.24167	134.5	NA
MS2/MCP	bcdGFP_st9	2015-05-01	Profiler (radius=10, n=0) : wholeEgg_0033.tab.txt	3	1	6	0.918	134	0.848	118	0.954	1.13559	126	NA
MS2/MCP	bcdGFP_st9	2015-05-01	Profiler (radius=10, n=0) : wholeEgg_0033.tab.txt	3	1	8	0.916	175	0.849	126	0.815	1.38889	150.5	NA
MS2/MCP	bcdGFP_st9	2015-05-01	Profiler (radius=10, n=0) : wholeEgg_0033.tab.txt	3	1	14	1.407	113	0.884	126	0.965	0.896825	119.5	NA
MS2/MCP	bcdGFP_st9	2015-05-01	Profiler (radius=10, n=0) : wholeEgg_0033.tab.txt	3	1	38	0.372	115	0.991	153	0.922	0.751634	134	NA
MS2/MCP	bcdGFP_st9	2015-05-01	Profiler (radius=10, n=0) : wholeEgg_0033.tab.txt	3	1	43	2.571	124	0.976	116	0.984	1.06897	120	NA
MS2/MCP	bcdGFP_st9	2015-05-01	Profiler (radius=10, n=0) : wholeEgg_0033.tab.txt	3	1	60	1.461	100	0.927	83	0.929	1.20482	91.5	NA
MS2/MCP	bcdGFP_st9	2015-05-01	Profiler (radius=10, n=0) : wholeEgg_0033.tab.txt	3	1	76	3.947	113	0.984	115	0.98	0.982609	114	NA
MS2/MCP	bcdGFP_st9	2015-05-01	Profiler (radius=10, n=0) : wholeEgg_0033.tab.txt	3	1	80	1.843	99	0.915	113	0.977	0.876106	106	NA
MS2/MCP	bcdGFP_st9	2015-05-01	Profiler (radius=10, n=0) : wholeEgg_0033.tab.txt	3	1	96	2.055	123	0.833	162	0.979	0.759259	142.5	NA
MS2/MCP	bcdGFP_st9	2015-05-01	Profiler (radius=10, n=0) : wholeEgg_0033.tab.txt	3	1	98	1.309	94	0.953	86	0.946	1.09302	90	NA
MS2/MCP	bcdGFP_st9	2015-05-01	Profiler (radius=10, n=0) : wholeEgg_0033.tab.txt	3	1	101	5.004	116	0.888	100	0.958	1.16	108	NA
MS2/MCP	bcdGFP_st9	2015-05-01	Profiler (radius=10, n=0) : wholeEgg_0033.tab.txt	3	1	115	2.87	126	0.963	101	0.953	1.24752	113.5	NA
MS2/MCP	bcdGFP_st9	2015-05-01	Profiler (radius=10, n=0) : wholeEgg_0033.tab.txt	3	1	116	1.27	138	0.956	93	0.948	1.48387	115.5	NA
MS2/MCP	bcdGFP_st9	2015-05-01	Profiler (radius=10, n=0) : wholeEgg_0033.tab.txt	3	1	123	3.219	152	0.968	114	0.961	1.33333	133	NA
MS2/MCP	bcdGFP_st9	2015-05-01	Profiler (radius=10, n=0) : wholeEgg_0033.tab.txt	3	1	129	5.423	169	0.851	95	0.839	1.77895	132	NA
MS2/MCP	bcdGFP_st9	2015-05-01	Profiler (radius=10, n=0) : wholeEgg_0033.tab.txt	3	1	135	5.484	114	0.99	127	0.981	0.897638	120.5	NA
MS2/MCP	bcdGFP_st9	2015-05-01	Profiler (radius=10, n=0) : wholeEgg_0033.tab.txt	3	1	150	7.466	123	0.813	96	0.93	1.28125	109.5	NA
MS2/MCP	bcdGFP_st9	2015-05-01	Profiler (radius=10, n=0) : wholeEgg_0033.tab.txt	3	1	159	1.579	87	0.988	80	0.97	1.0875	83.5	NA
MS2/MCP	bcdGFP_st9	2015-05-01	Profiler (radius=10, n=0) : wholeEgg_0033.tab.txt	3	1	165	2.315	98	0.975	101	0.881	0.970297	99.5	NA
MS2/MCP	bcdGFP_st9	2015-05-01	Profiler (radius=10, n=0) : wholeEgg_0033.tab.txt	3	1	167	2.356	124	0.989	101	0.859	1.22772	112.5	NA
MS2/MCP	bcdGFP_st9	2015-05-01	Profiler (radius=10, n=0) : wholeEgg_0033.tab.txt	3	1	170	2.899	105	0.889	75	0.933	1.4	90	NA
MS2/MCP	bcdGFP_st9	2015-05-01	Profiler (radius=10, n=0) : wholeEgg_0033.tab.txt	3	1	183	0.354	86	0.897	84	0.959	1.02381	85	NA
MS2/MCP	bcdGFP_st9	2015-05-01	Profiler (radius=10, n=0) : wholeEgg_0033.tab.txt	3	1	187	5.815	106	0.979	82	0.842	1.29268	94	NA
MS2/MCP	bcdGFP_st9	2015-05-01	Profiler (radius=10, n=0) : wholeEgg_0033.tab.txt	3	1	193	2.803	104	0.96	100	0.847	1.04	102	NA
MS2/MCP	bcdGFP_st9	2015-05-01	Profiler (radius=10, n=0) : wholeEgg_0033.tab.txt	3	1	237	6.287	95	0.955	84	0.959	1.13095	89.5	NA
MS2/MCP	bcdGFP_st9	2015-05-01	Profiler (radius=10, n=0) : wholeEgg_0033.tab.txt	3	1	247	2.34	86	0.844	113	0.876	0.761062	99.5	NA
MS2/MCP	bcdGFP_st9	2015-05-01	Profiler (radius=10, n=0) : wholeEgg_0033.tab.txt	3	1	251	3.95	65	0.827	64	0.836	1.01562	64.5	NA
MS2/MCP	bcdGFP_st9	2015-05-01	Profiler (radius=10, n=0) : wholeEgg_0033.tab.txt	3	1	290	5.162	99	0.877	91	0.945	1.08791	95	NA
MS2/MCP	bcdGFP_st9	2015-05-01	Profiler (radius=10, n=0) : wholeEgg_0033.tab.txt	3	1	345	1.16	90	0.894	134	0.919	0.671642	112	NA
MS2/MCP	bcdGFP_st9	2015-05-01	Profiler (radius=10, n=0) : wholeEgg_0033.tab.txt	3	1	438	5.728	66	0.868	56	0.897	1.17857	61	NA
MS2/MCP	bcdGFP_st9	2015-05-01	Profiler (radius=10, n=0) : wholeEgg_0035.tab.txt	3	2	14	3.138	130	0.959	112	0.985	1.16071	121	NA
MS2/MCP	bcdGFP_st9	2015-05-01	Profiler (radius=10, n=0) : wholeEgg_0035.tab.txt	3	2	16	2.667	134	0.962	149	0.995	0.899329	141.5	NA
MS2/MCP	bcdGFP_st9	2015-05-01	Profiler (radius=10, n=0) : wholeEgg_0035.tab.txt	3	2	23	2.971	148	0.971	108	0.896	1.37037	128	NA
MS2/MCP	bcdGFP_st9	2015-05-01	Profiler (radius=10, n=0) : wholeEgg_0035.tab.txt	3	2	45	1.441	145	0.926	145	0.926	1	145	NA
MS2/MCP	bcdGFP_st9	2015-05-01	Profiler (radius=10, n=0) : wholeEgg_0035.tab.txt	3	2	66	0.648	97	0.973	85	0.949	1.14118	91	NA
MS2/MCP	bcdGFP_st9	2015-05-01	Profiler (radius=10, n=0) : wholeEgg_0035.tab.txt	3	2	68	1.992	96	0.953	88	0.936	1.09091	92	NA
MS2/MCP	bcdGFP_st9	2015-05-01	Profiler (radius=10, n=0) : wholeEgg_0035.tab.txt	3	2	80	6.845	83	0.82	94	0.812	0.882979	88.5	NA
MS2/MCP	bcdGFP_st9	2015-05-01	Profiler (radius=10, n=0) : wholeEgg_0035.tab.txt	3	2	82	1.11	122	0.906	67	0.982	1.8209	94.5	NA
MS2/MCP	bcdGFP_st9	2015-05-01	Profiler (radius=10, n=0) : wholeEgg_0035.tab.txt	3	2	96	2.26	83	0.819	86	0.92	0.965116	84.5	NA
MS2/MCP	bcdGFP_st9	2015-05-01	Profiler (radius=10, n=0) : wholeEgg_0035.tab.txt	3	2	102	0.889	140	0.933	107	0.924	1.30841	123.5	NA
MS2/MCP	bcdGFP_st9	2015-05-01	Profiler (radius=10, n=0) : wholeEgg_0035.tab.txt	3	2	132	3.956	65	0.82	102	0.918	0.637255	83.5	NA
MS2/MCP	bcdGFP_st9	2015-05-01	Profiler (radius=10, n=0) : wholeEgg_0039.tab.txt	3	3_2	4	6.894	163	0.994	195	0.947	0.835897	179	NA
MS2/MCP	bcdGFP_st9	2015-05-01	Profiler (radius=10, n=0) : wholeEgg_0039.tab.txt	3	3_2	16	1.057	126	0.99	119	0.941	1.05882	122.5	NA
MS2/MCP	bcdGFP_st9	2015-05-01	Profiler (radius=10, n=0) : wholeEgg_0039.tab.txt	3	3_2	17	6.951	197	0.815	148	0.966	1.33108	172.5	NA
MS2/MCP	bcdGFP_st9	2015-05-01	Profiler (radius=10, n=0) : wholeEgg_0039.tab.txt	3	3_2	28	5.195	92	0.968	133	0.92	0.691729	112.5	NA
MS2/MCP	bcdGFP_st9	2015-05-01	Profiler (radius=10, n=0) : wholeEgg_0039.tab.txt	3	3_2	39	6.371	118	0.99	92	0.951	1.28261	105	NA
MS2/MCP	bcdGFP_st9	2015-05-01	Profiler (radius=10, n=0) : wholeEgg_0039.tab.txt	3	3_2	43	2.332	125	0.91	150	0.989	0.833333	137.5	NA
MS2/MCP	bcdGFP_st9	2015-05-01	Profiler (radius=10, n=0) : wholeEgg_0039.tab.txt	3	3_2	55	2.901	116	0.992	150	0.93	0.773333	133	NA
MS2/MCP	bcdGFP_st9	2015-05-01	Profiler (radius=10, n=0) : wholeEgg_0039.tab.txt	3	3_2	116	3.874	83	0.908	115	0.92	0.721739	99	NA
MS2/MCP	bcdGFP_st9	2015-05-01	Profiler (radius=10, n=0) : wholeEgg_0039.tab.txt	3	3_2	122	7.512	117	0.874	131	0.968	0.89313	124	NA
MS2/MCP	bcdGFP_st9	2015-05-01	Profiler (radius=10, n=0) : wholeEgg_0039.tab.txt	3	3_2	185	5.99	72	0.954	91	0.915	0.791209	81.5	NA
MS2/MCP	bcdGFP_st9	2015-05-01	Profiler (radius=10, n=0) : wholeEgg_0039.tab.txt	3	3_2	244	5.365	78	0.909	111	0.952	0.702703	94.5	NA
MS2/MCP	bcdGFP_st9	2015-05-01	Profiler (radius=10, n=0) : wholeEgg_0041.tab.txt	3	3_3	57	1.597	136	0.942	100	0.932	1.36	118	NA
MS2/MCP	bcdGFP_st9	2015-05-01	Profiler (radius=10, n=0) : wholeEgg_0041.tab.txt	3	3_3	61	0.414	141	0.966	114	0.967	1.23684	127.5	NA
MS2/MCP	bcdGFP_st9	2015-05-01	Profiler (radius=10, n=0) : wholeEgg_0041.tab.txt	3	3_3	79	1.684	126	0.965	146	0.938	0.863014	136	NA
MS2/MCP	bcdGFP_st9	2015-05-01	Profiler (radius=10, n=0) : wholeEgg_0041.tab.txt	3	3_3	81	4.334	184	0.974	164	0.979	1.12195	174	NA
MS2/MCP	bcdGFP_st9	2015-05-01	Profiler (radius=10, n=0) : wholeEgg_0041.tab.txt	3	3_3	103	1.232	160	0.95	158	0.958	1.01266	159	NA
MS2/MCP	bcdGFP_st9	2015-05-01	Profiler (radius=10, n=0) : wholeEgg_0041.tab.txt	3	3_3	107	2.674	117	0.993	140	0.958	0.835714	128.5	NA
MS2/MCP	bcdGFP_st9	2015-05-01	Profiler (radius=10, n=0) : wholeEgg_0041.tab.txt	3	3_3	114	9.834	78	0.932	77	0.966	1.01299	77.5	NA
MS2/MCP	bcdGFP_st9	2015-05-01	Profiler (radius=10, n=0) : wholeEgg_0041.tab.txt	3	3_3	137	4.272	63	0.809	71	0.959	0.887324	67	NA
MS2/MCP	bcdGFP_st9	2015-05-01	Profiler (radius=10, n=0) : wholeEgg_0041.tab.txt	3	3_3	142	8.679	139	0.812	115	0.98	1.2087	127	NA
MS2/MCP	bcdGFP_st9	2015-05-01	Profiler (radius=10, n=0) : wholeEgg_0041.tab.txt	3	3_3	165	3.18	123	0.949	78	0.847	1.57692	100.5	NA
MS2/MCP	bcdGFP_st9	2015-05-01	Profiler (radius=10, n=0) : wholeEgg_0041.tab.txt	3	3_3	223	4.838	120	0.824	79	0.957	1.51899	99.5	NA
MS2/MCP	bcdGFP_st9	2015-05-01	Profiler (radius=10, n=0) : wholeEgg_0044.tab.txt	4	1	2	3.181	171	0.971	127	0.983	1.34646	149	NA
MS2/MCP	bcdGFP_st9	2015-05-01	Profiler (radius=10, n=0) : wholeEgg_0044.tab.txt	4	1	5	2.82	97	0.867	133	0.99	0.729323	115	NA
MS2/MCP	bcdGFP_st9	2015-05-01	Profiler (radius=10, n=0) : wholeEgg_0044.tab.txt	4	1	6	3.531	116	0.967	137	0.97	0.846715	126.5	NA
MS2/MCP	bcdGFP_st9	2015-05-01	Profiler (radius=10, n=0) : wholeEgg_0044.tab.txt	4	1	8	5.605	165	0.883	141	0.858	1.17021	153	NA
MS2/MCP	bcdGFP_st9	2015-05-01	Profiler (radius=10, n=0) : wholeEgg_0044.tab.txt	4	1	13	2.792	112	0.921	103	0.993	1.08738	107.5	NA
MS2/MCP	bcdGFP_st9	2015-05-01	Profiler (radius=10, n=0) : wholeEgg_0044.tab.txt	4	1	17	7.725	132	0.982	101	0.944	1.30693	116.5	NA
MS2/MCP	bcdGFP_st9	2015-05-01	Profiler (radius=10, n=0) : wholeEgg_0044.tab.txt	4	1	21	6.377	140	0.99	106	0.865	1.32075	123	NA
MS2/MCP	bcdGFP_st9	2015-05-01	Profiler (radius=10, n=0) : wholeEgg_0044.tab.txt	4	1	22	0.974	91	0.918	109	0.937	0.834862	100	NA
MS2/MCP	bcdGFP_st9	2015-05-01	Profiler (radius=10, n=0) : wholeEgg_0044.tab.txt	4	1	43	2.375	152	0.978	115	0.968	1.32174	133.5	NA
MS2/MCP	bcdGFP_st9	2015-05-01	Profiler (radius=10, n=0) : wholeEgg_0044.tab.txt	4	1	45	0.664	150	0.983	176	0.917	0.852273	163	NA
MS2/MCP	bcdGFP_st9	2015-05-01	Profiler (radius=10, n=0) : wholeEgg_0044.tab.txt	4	1	53	3.081	101	0.916	109	0.886	0.926606	105	NA
MS2/MCP	bcdGFP_st9	2015-05-01	Profiler (radius=10, n=0) : wholeEgg_0044.tab.txt	4	1	77	4.314	149	0.963	142	0.975	1.0493	145.5	NA
MS2/MCP	bcdGFP_st9	2015-05-01	Profiler (radius=10, n=0) : wholeEgg_0044.tab.txt	4	1	104	0.515	125	0.82	107	0.848	1.16822	116	NA
MS2/MCP	bcdGFP_st9	2015-05-01	Profiler (radius=10, n=0) : wholeEgg_0044.tab.txt	4	1	109	7.166	118	0.938	171	0.88	0.690058	144.5	NA
MS2/MCP	bcdGFP_st9	2015-05-01	Profiler (radius=10, n=0) : wholeEgg_0044.tab.txt	4	1	135	3.355	79	0.917	85	0.955	0.929412	82	NA
MS2/MCP	bcdGFP_st9	2015-05-01	Profiler (radius=10, n=0) : wholeEgg_0044.tab.txt	4	1	147	6.654	106	0.811	112	0.842	0.946429	109	NA
MS2/MCP	bcdGFP_st9	2015-05-01	Profiler (radius=10, n=0) : wholeEgg_0044.tab.txt	4	1	158	4.2	102	0.987	104	0.991	0.980769	103	NA
MS2/MCP	bcdGFP_st9	2015-05-01	Profiler (radius=10, n=0) : wholeEgg_0044.tab.txt	4	1	159	5.255	113	0.805	121	0.882	0.933884	117	NA
MS2/MCP	bcdGFP_st9	2015-05-01	Profiler (radius=10, n=0) : wholeEgg_0044.tab.txt	4	1	193	3.161	104	0.855	102	0.965	1.01961	103	NA
MS2/MCP	bcdGFP_st9	2015-05-01	Profiler (radius=10, n=0) : wholeEgg_0044.tab.txt	4	1	215	0.602	117	0.871	91	0.914	1.28571	104	NA
MS2/MCP	bcdGFP_st9	2015-05-01	Profiler (radius=10, n=0) : wholeEgg_0044.tab.txt	4	1	225	5.502	81	0.824	118	0.904	0.686441	99.5	NA
MS2/MCP	bcdGFP_st9	2015-05-01	Profiler (radius=10, n=0) : wholeEgg_0044.tab.txt	4	1	234	5.132	87	0.944	112	0.807	0.776786	99.5	NA
MS2/MCP	bcdGFP_st9	2015-05-01	Profiler (radius=10, n=0) : wholeEgg_0044.tab.txt	4	1	251	2.987	76	0.831	64	0.948	1.1875	70	NA
MS2/MCP	bcdGFP_st9	2015-05-01	Profiler (radius=10, n=0) : wholeEgg_0044.tab.txt	4	1	257	2.428	90	0.831	75	0.838	1.2	82.5	NA
MS2/MCP	bcdGFP_st9	2015-05-01	Profiler (radius=10, n=0) : wholeEgg_0044.tab.txt	4	1	258	2.997	93	0.944	80	0.907	1.1625	86.5	NA
MS2/MCP	bcdGFP_st9	2015-05-01	Profiler (radius=10, n=0) : wholeEgg_0044.tab.txt	4	1	263	8.003	100	0.953	98	0.936	1.02041	99	NA
MS2/MCP	bcdGFP_st9	2015-05-01	Profiler (radius=10, n=0) : wholeEgg_0044.tab.txt	4	1	282	4.97	105	0.851	98	0.978	1.07143	101.5	NA
MS2/MCP	bcdGFP_st9	2015-05-01	Profiler (radius=10, n=0) : wholeEgg_0044.tab.txt	4	1	307	2.98	96	0.972	156	0.978	0.615385	126	NA
MS2/MCP	bcdGFP_st9	2015-05-01	Profiler (radius=10, n=0) : wholeEgg_0044.tab.txt	4	1	312	2.812	114	0.832	181	0.917	0.629834	147.5	NA
MS2/MCP	bcdGFP_st9	2015-05-01	Profiler (radius=10, n=0) : wholeEgg_0044.tab.txt	4	1	313	7.191	80	0.861	107	0.967	0.747664	93.5	NA
MS2/MCP	bcdGFP_st9	2015-05-01	Profiler (radius=10, n=0) : wholeEgg_0044.tab.txt	4	1	341	5.741	92	0.915	151	0.924	0.609272	121.5	NA
MS2/MCP	bcdGFP_st9	2015-05-01	Profiler (radius=10, n=0) : wholeEgg_0044.tab.txt	4	1	358	2.656	210	0.877	137	0.863	1.53285	173.5	NA
MS2/MCP	bcdGFP_st9	2015-05-01	Profiler (radius=10, n=0) : wholeEgg_0044.tab.txt	4	1	411	6.384	98	0.871	77	0.803	1.27273	87.5	NA
MS2/MCP	bcdGFP_st9	2015-05-01	Profiler (radius=10, n=0) : wholeEgg_0044.tab.txt	4	1	417	4.579	113	0.947	89	0.946	1.26966	101	NA
MS2/MCP	bcdGFP_st9	2015-05-01	Profiler (radius=10, n=0) : wholeEgg_0046.tab.txt	4	2	4	2.405	97	0.982	107	0.992	0.906542	102	NA
MS2/MCP	bcdGFP_st9	2015-05-01	Profiler (radius=10, n=0) : wholeEgg_0046.tab.txt	4	2	17	4.416	163	0.976	96	0.921	1.69792	129.5	NA
MS2/MCP	bcdGFP_st9	2015-05-01	Profiler (radius=10, n=0) : wholeEgg_0046.tab.txt	4	2	24	2.004	110	0.951	131	0.974	0.839695	120.5	NA
MS2/MCP	bcdGFP_st9	2015-05-01	Profiler (radius=10, n=0) : wholeEgg_0046.tab.txt	4	2	25	4.999	113	0.936	106	0.987	1.06604	109.5	NA
MS2/MCP	bcdGFP_st9	2015-05-01	Profiler (radius=10, n=0) : wholeEgg_0046.tab.txt	4	2	50	3.711	104	0.853	89	0.949	1.16854	96.5	NA
MS2/MCP	bcdGFP_st9	2015-05-01	Profiler (radius=10, n=0) : wholeEgg_0046.tab.txt	4	2	52	0.763	96	0.93	81	0.834	1.18519	88.5	NA
MS2/MCP	bcdGFP_st9	2015-05-01	Profiler (radius=10, n=0) : wholeEgg_0046.tab.txt	4	2	54	1.026	106	0.968	105	0.96	1.00952	105.5	NA
MS2/MCP	bcdGFP_st9	2015-05-01	Profiler (radius=10, n=0) : wholeEgg_0046.tab.txt	4	2	65	8.691	113	0.897	139	0.986	0.81295	126	NA
MS2/MCP	bcdGFP_st9	2015-05-01	Profiler (radius=10, n=0) : wholeEgg_0046.tab.txt	4	2	91	3.058	101	0.912	98	0.967	1.03061	99.5	NA
MS2/MCP	bcdGFP_st9	2015-05-01	Profiler (radius=10, n=0) : wholeEgg_0046.tab.txt	4	2	121	1.551	96	0.886	135	0.917	0.711111	115.5	NA
MS2/MCP	bcdGFP_st9	2015-05-01	Profiler (radius=10, n=0) : wholeEgg_0046.tab.txt	4	2	124	3.206	140	0.981	97	0.975	1.4433	118.5	NA
MS2/MCP	bcdGFP_st9	2015-05-01	Profiler (radius=10, n=0) : wholeEgg_0046.tab.txt	4	2	125	4.899	89	0.907	106	0.979	0.839623	97.5	NA
MS2/MCP	bcdGFP_st9	2015-05-01	Profiler (radius=10, n=0) : wholeEgg_0046.tab.txt	4	2	135	2.683	80	0.878	93	0.973	0.860215	86.5	NA
MS2/MCP	bcdGFP_st9	2015-05-01	Profiler (radius=10, n=0) : wholeEgg_0046.tab.txt	4	2	138	2.845	93	0.86	89	0.919	1.04494	91	NA
MS2/MCP	bcdGFP_st9	2015-05-01	Profiler (radius=10, n=0) : wholeEgg_0046.tab.txt	4	2	156	2.234	117	0.863	106	0.888	1.10377	111.5	NA
MS2/MCP	bcdGFP_st9	2015-05-01	Profiler (radius=10, n=0) : wholeEgg_0046.tab.txt	4	2	182	7.731	135	0.928	97	0.875	1.39175	116	NA
MS2/MCP	bcdGFP_st9	2015-05-01	Profiler (radius=10, n=0) : wholeEgg_0046.tab.txt	4	2	183	10.202	128	0.9	90	0.866	1.42222	109	NA
MS2/MCP	bcdGFP_st9	2015-05-01	Profiler (radius=10, n=0) : wholeEgg_0046.tab.txt	4	2	203	2.452	90	0.914	74	0.847	1.21622	82	NA
MS2/MCP	bcdGFP_st9	2015-05-01	Profiler (radius=10, n=0) : wholeEgg_0046.tab.txt	4	2	238	1.273	68	0.944	54	0.882	1.25926	61	NA
MS2/MCP	bcdGFP_st9	2015-05-01	Profiler (radius=10, n=0) : wholeEgg_0046.tab.txt	4	2	241	1.039	58	0.937	49	0.86	1.18367	53.5	NA
MS2/MCP	bcdGFP_st9	2015-05-01	Profiler (radius=10, n=0) : wholeEgg_0046.tab.txt	4	2	381	3.941	60	0.853	62	0.925	0.967742	61	NA
MS2/MCP	bcdGFP_st9	2015-05-01	Profiler (radius=10, n=0) : wholeEgg_0048.tab.txt	4	3	0	1.439	133	0.928	167	0.967	0.796407	150	NA
MS2/MCP	bcdGFP_st9	2015-05-01	Profiler (radius=10, n=0) : wholeEgg_0048.tab.txt	4	3	1	2.224	187	0.943	118	0.993	1.58475	152.5	NA
MS2/MCP	bcdGFP_st9	2015-05-01	Profiler (radius=10, n=0) : wholeEgg_0048.tab.txt	4	3	8	7.933	152	0.848	110	0.816	1.38182	131	NA
MS2/MCP	bcdGFP_st9	2015-05-01	Profiler (radius=10, n=0) : wholeEgg_0048.tab.txt	4	3	9	9.169	176	0.953	129	0.987	1.36434	152.5	NA
MS2/MCP	bcdGFP_st9	2015-05-01	Profiler (radius=10, n=0) : wholeEgg_0048.tab.txt	4	3	15	1.932	135	0.979	122	0.986	1.10656	128.5	NA
MS2/MCP	bcdGFP_st9	2015-05-01	Profiler (radius=10, n=0) : wholeEgg_0048.tab.txt	4	3	18	0.897	133	0.95	111	0.979	1.1982	122	NA
MS2/MCP	bcdGFP_st9	2015-05-01	Profiler (radius=10, n=0) : wholeEgg_0048.tab.txt	4	3	19	1.467	106	0.971	110	0.803	0.963636	108	NA
MS2/MCP	bcdGFP_st9	2015-05-01	Profiler (radius=10, n=0) : wholeEgg_0048.tab.txt	4	3	28	0.709	84	0.913	99	0.993	0.848485	91.5	NA
MS2/MCP	bcdGFP_st9	2015-05-01	Profiler (radius=10, n=0) : wholeEgg_0048.tab.txt	4	3	37	7.893	141	0.883	94	0.836	1.5	117.5	NA
MS2/MCP	bcdGFP_st9	2015-05-01	Profiler (radius=10, n=0) : wholeEgg_0048.tab.txt	4	3	58	2.956	153	0.918	128	0.984	1.19531	140.5	NA
MS2/MCP	bcdGFP_st9	2015-05-01	Profiler (radius=10, n=0) : wholeEgg_0048.tab.txt	4	3	78	4.532	138	0.962	128	0.929	1.07812	133	NA
MS2/MCP	bcdGFP_st9	2015-05-01	Profiler (radius=10, n=0) : wholeEgg_0048.tab.txt	4	3	81	1.428	110	0.955	72	0.859	1.52778	91	NA
MS2/MCP	bcdGFP_st9	2015-05-01	Profiler (radius=10, n=0) : wholeEgg_0048.tab.txt	4	3	96	0.727	89	0.937	99	0.867	0.89899	94	NA
MS2/MCP	bcdGFP_st9	2015-05-01	Profiler (radius=10, n=0) : wholeEgg_0048.tab.txt	4	3	104	2.701	107	0.951	110	0.974	0.972727	108.5	NA
MS2/MCP	bcdGFP_st9	2015-05-01	Profiler (radius=10, n=0) : wholeEgg_0048.tab.txt	4	3	125	3.393	120	0.909	90	0.961	1.33333	105	NA
MS2/MCP	bcdGFP_st9	2015-05-01	Profiler (radius=10, n=0) : wholeEgg_0048.tab.txt	4	3	138	9.399	107	0.934	140	0.877	0.764286	123.5	NA
MS2/MCP	bcdGFP_st9	2015-05-01	Profiler (radius=10, n=0) : wholeEgg_0048.tab.txt	4	3	171	2.746	107	0.985	96	0.988	1.11458	101.5	NA
MS2/MCP	bcdGFP_st9	2015-05-01	Profiler (radius=10, n=0) : wholeEgg_0048.tab.txt	4	3	184	4.316	151	0.97	128	0.903	1.17969	139.5	NA
MS2/MCP	bcdGFP_st9	2015-05-01	Profiler (radius=10, n=0) : wholeEgg_0048.tab.txt	4	3	187	8.982	116	0.915	83	0.897	1.39759	99.5	NA
MS2/MCP	bcdGFP_st9	2015-05-01	Profiler (radius=10, n=0) : wholeEgg_0048.tab.txt	4	3	197	1.439	112	0.894	68	0.954	1.64706	90	NA
MS2/MCP	bcdGFP_st9	2015-05-01	Profiler (radius=10, n=0) : wholeEgg_0048.tab.txt	4	3	199	5.275	123	0.87	74	0.927	1.66216	98.5	NA
MS2/MCP	bcdGFP_st9	2015-05-01	Profiler (radius=10, n=0) : wholeEgg_0048.tab.txt	4	3	229	7.053	99	0.943	95	0.944	1.04211	97	NA
MS2/MCP	bcdGFP_st9	2015-05-01	Profiler (radius=10, n=0) : wholeEgg_0048.tab.txt	4	3	240	13.388	88	0.967	108	0.943	0.814815	98	NA
MS2/MCP	bcdGFP_st9	2015-05-01	Profiler (radius=10, n=0) : wholeEgg_0048.tab.txt	4	3	296	6.265	71	0.925	51	0.817	1.39216	61	NA
MS2/MCP	bcdGFP_st9	2015-06-26	Profiler (radius=10) : bcdGFP_WT_st9_0000.tab.txt	1	1	1	5.957	84	0.942	124	0.975	0.677419	104	NA
MS2/MCP	bcdGFP_st9	2015-06-26	Profiler (radius=10) : bcdGFP_WT_st9_0000.tab.txt	1	1	2	11.071	94	0.973	75	0.945	1.25333	84.5	NA
MS2/MCP	bcdGFP_st9	2015-06-26	Profiler (radius=10) : bcdGFP_WT_st9_0000.tab.txt	1	1	8	13.235	108	0.984	102	0.973	1.05882	105	NA
MS2/MCP	bcdGFP_st9	2015-06-26	Profiler (radius=10) : bcdGFP_WT_st9_0000.tab.txt	1	1	9	3.276	78	0.908	69	0.827	1.13043	73.5	NA
MS2/MCP	bcdGFP_st9	2015-06-26	Profiler (radius=10) : bcdGFP_WT_st9_0000.tab.txt	1	1	23	11.982	135	0.945	81	0.95	1.66667	108	NA
MS2/MCP	bcdGFP_st9	2015-06-26	Profiler (radius=10) : bcdGFP_WT_st9_0000.tab.txt	1	1	25	2.343	93	0.862	126	0.832	0.738095	109.5	NA
MS2/MCP	bcdGFP_st9	2015-06-26	Profiler (radius=10) : bcdGFP_WT_st9_0000.tab.txt	1	1	30	4.447	87	0.951	100	0.913	0.87	93.5	NA
MS2/MCP	bcdGFP_st9	2015-06-26	Profiler (radius=10) : bcdGFP_WT_st9_0000.tab.txt	1	1	31	13.215	112	0.958	86	0.969	1.30233	99	NA
MS2/MCP	bcdGFP_st9	2015-06-26	Profiler (radius=10) : bcdGFP_WT_st9_0000.tab.txt	1	1	44	5.432	80	0.932	138	0.862	0.57971	109	NA
MS2/MCP	bcdGFP_st9	2015-06-26	Profiler (radius=10) : bcdGFP_WT_st9_0000.tab.txt	1	1	47	9.989	138	0.956	124	0.93	1.1129	131	NA
MS2/MCP	bcdGFP_st9	2015-06-26	Profiler (radius=10) : bcdGFP_WT_st9_0000.tab.txt	1	1	48	10.868	74	0.927	70	0.945	1.05714	72	NA
MS2/MCP	bcdGFP_st9	2015-06-26	Profiler (radius=10) : bcdGFP_WT_st9_0000.tab.txt	1	1	50	13.215	131	0.945	162	0.899	0.808642	146.5	NA
MS2/MCP	bcdGFP_st9	2015-06-26	Profiler (radius=10) : bcdGFP_WT_st9_0000.tab.txt	1	1	58	7.942	94	0.934	92	0.946	1.02174	93	NA
MS2/MCP	bcdGFP_st9	2015-06-26	Profiler (radius=10) : bcdGFP_WT_st9_0000.tab.txt	1	1	61	4.019	96	0.972	93	0.944	1.03226	94.5	NA
MS2/MCP	bcdGFP_st9	2015-06-26	Profiler (radius=10) : bcdGFP_WT_st9_0000.tab.txt	1	1	71	3.166	71	0.902	110	0.953	0.645455	90.5	NA
MS2/MCP	bcdGFP_st9	2015-06-26	Profiler (radius=10) : bcdGFP_WT_st9_0000.tab.txt	1	1	74	9.918	72	0.951	118	0.911	0.610169	95	NA
MS2/MCP	bcdGFP_st9	2015-06-26	Profiler (radius=10) : bcdGFP_WT_st9_0000.tab.txt	1	1	85	14.324	105	0.901	118	0.8	0.889831	111.5	NA
MS2/MCP	bcdGFP_st9	2015-06-26	Profiler (radius=10) : bcdGFP_WT_st9_0000.tab.txt	1	1	88	4.239	78	0.962	80	0.94	0.975	79	NA
MS2/MCP	bcdGFP_st9	2015-06-26	Profiler (radius=10) : bcdGFP_WT_st9_0000.tab.txt	1	1	100	11.016	91	0.925	62	0.894	1.46774	76.5	NA
MS2/MCP	bcdGFP_st9	2015-06-26	Profiler (radius=10) : bcdGFP_WT_st9_0000.tab.txt	1	1	122	4.672	65	0.9	68	0.932	0.955882	66.5	NA
MS2/MCP	bcdGFP_st9	2015-06-26	Profiler (radius=10) : bcdGFP_WT_st9_0000.tab.txt	1	1	129	2.452	68	0.908	45	0.86	1.51111	56.5	NA
MS2/MCP	bcdGFP_st9	2015-06-26	Profiler (radius=10) : bcdGFP_WT_st9_0000.tab.txt	1	1	133	5.865	151	0.865	81	0.856	1.8642	116	NA
MS2/MCP	bcdGFP_st9	2015-06-26	Profiler (radius=10) : bcdGFP_WT_st9_0000.tab.txt	1	1	173	9.463	72	0.91	52	0.814	1.38462	62	NA
MS2/MCP	bcdGFP_st9	2015-06-26	Profiler (radius=10) : bcdGFP_WT_st9_0000.tab.txt	1	1	174	9.867	82	0.889	73	0.852	1.12329	77.5	NA
MS2/MCP	bcdGFP_st9	2015-06-26	Profiler (radius=10) : bcdGFP_WT_st9_0002.tab.txt	1	2	1	1.655	129	0.968	117	0.965	1.10256	123	NA
MS2/MCP	bcdGFP_st9	2015-06-26	Profiler (radius=10) : bcdGFP_WT_st9_0002.tab.txt	1	2	9	8.305	109	0.951	102	0.98	1.06863	105.5	NA
MS2/MCP	bcdGFP_st9	2015-06-26	Profiler (radius=10) : bcdGFP_WT_st9_0002.tab.txt	1	2	12	5.11	214	0.946	188	0.877	1.1383	201	NA
MS2/MCP	bcdGFP_st9	2015-06-26	Profiler (radius=10) : bcdGFP_WT_st9_0002.tab.txt	1	2	17	7.364	82	0.919	86	0.965	0.953488	84	NA
MS2/MCP	bcdGFP_st9	2015-06-26	Profiler (radius=10) : bcdGFP_WT_st9_0002.tab.txt	1	2	19	7.478	105	0.872	126	0.922	0.833333	115.5	NA
MS2/MCP	bcdGFP_st9	2015-06-26	Profiler (radius=10) : bcdGFP_WT_st9_0002.tab.txt	1	2	24	2.964	169	0.987	115	0.89	1.46957	142	NA
MS2/MCP	bcdGFP_st9	2015-06-26	Profiler (radius=10) : bcdGFP_WT_st9_0002.tab.txt	1	2	26	2.319	121	0.905	136	0.877	0.889706	128.5	NA
MS2/MCP	bcdGFP_st9	2015-06-26	Profiler (radius=10) : bcdGFP_WT_st9_0002.tab.txt	1	2	27	9.665	125	0.976	145	0.963	0.862069	135	NA
MS2/MCP	bcdGFP_st9	2015-06-26	Profiler (radius=10) : bcdGFP_WT_st9_0002.tab.txt	1	2	30	9.212	138	0.936	131	0.974	1.05344	134.5	NA
MS2/MCP	bcdGFP_st9	2015-06-26	Profiler (radius=10) : bcdGFP_WT_st9_0002.tab.txt	1	2	31	8.814	83	0.929	86	0.909	0.965116	84.5	NA
MS2/MCP	bcdGFP_st9	2015-06-26	Profiler (radius=10) : bcdGFP_WT_st9_0002.tab.txt	1	2	34	6.38	77	0.902	97	0.977	0.793814	87	NA
MS2/MCP	bcdGFP_st9	2015-06-26	Profiler (radius=10) : bcdGFP_WT_st9_0002.tab.txt	1	2	46	7.499	125	0.962	121	0.952	1.03306	123	NA
MS2/MCP	bcdGFP_st9	2015-06-26	Profiler (radius=10) : bcdGFP_WT_st9_0002.tab.txt	1	2	49	11.922	118	0.876	79	0.85	1.49367	98.5	NA
MS2/MCP	bcdGFP_st9	2015-06-26	Profiler (radius=10) : bcdGFP_WT_st9_0002.tab.txt	1	2	52	6.044	83	0.928	111	0.931	0.747748	97	NA
MS2/MCP	bcdGFP_st9	2015-06-26	Profiler (radius=10) : bcdGFP_WT_st9_0002.tab.txt	1	2	53	4.127	93	0.873	91	0.935	1.02198	92	NA
MS2/MCP	bcdGFP_st9	2015-06-26	Profiler (radius=10) : bcdGFP_WT_st9_0002.tab.txt	1	2	56	2.873	103	0.903	85	0.834	1.21176	94	NA
MS2/MCP	bcdGFP_st9	2015-06-26	Profiler (radius=10) : bcdGFP_WT_st9_0002.tab.txt	1	2	60	5.229	83	0.896	72	0.823	1.15278	77.5	NA
MS2/MCP	bcdGFP_st9	2015-06-26	Profiler (radius=10) : bcdGFP_WT_st9_0002.tab.txt	1	2	85	8.739	75	0.875	76	0.895	0.986842	75.5	NA
MS2/MCP	bcdGFP_st9	2015-06-26	Profiler (radius=10) : bcdGFP_WT_st9_0002.tab.txt	1	2	99	7.505	50	0.824	57	0.944	0.877193	53.5	NA
MS2/MCP	bcdGFP_st9	2015-06-26	Profiler (radius=10) : bcdGFP_WT_st9_0002.tab.txt	1	2	162	2.9	65	0.889	104	0.9	0.625	84.5	NA
MS2/MCP	bcdGFP_st9	2015-06-26	Profiler (radius=10) : bcdGFP_WT_st9_0002.tab.txt	1	2	183	4.34	69	0.827	92	0.927	0.75	80.5	NA
MS2/MCP	bcdGFP_st9	2015-06-26	Profiler (radius=10) : bcdGFP_WT_st9_0005.tab.txt	1	2	20	1.65	157	0.942	114	0.889	1.37719	135.5	NA
MS2/MCP	bcdGFP_st9	2015-06-26	Profiler (radius=10) : bcdGFP_WT_st9_0005.tab.txt	1	2	29	3.445	172	0.896	121	0.915	1.42149	146.5	NA
MS2/MCP	bcdGFP_st9	2015-06-26	Profiler (radius=10) : bcdGFP_WT_st9_0005.tab.txt	1	2	42	7.704	57	0.855	64	0.877	0.890625	60.5	NA
MS2/MCP	bcdGFP_st9	2015-06-26	Profiler (radius=10, n=0) : bcdGFP_WT_st9_0008.tab.txt	1	3	0	1.052	128	0.85	115	0.956	1.11304	121.5	NA
MS2/MCP	bcdGFP_st9	2015-06-26	Profiler (radius=10, n=0) : bcdGFP_WT_st9_0008.tab.txt	1	3	6	4.646	99	0.948	161	0.911	0.614907	130	NA
MS2/MCP	bcdGFP_st9	2015-06-26	Profiler (radius=10, n=0) : bcdGFP_WT_st9_0008.tab.txt	1	3	7	2.16	75	0.983	106	0.983	0.707547	90.5	NA
MS2/MCP	bcdGFP_st9	2015-06-26	Profiler (radius=10, n=0) : bcdGFP_WT_st9_0008.tab.txt	1	3	17	4.491	179	0.919	128	0.911	1.39844	153.5	NA
MS2/MCP	bcdGFP_st9	2015-06-26	Profiler (radius=10, n=0) : bcdGFP_WT_st9_0008.tab.txt	1	3	26	1.574	96	0.896	99	0.95	0.969697	97.5	NA
MS2/MCP	bcdGFP_st9	2015-06-26	Profiler (radius=10, n=0) : bcdGFP_WT_st9_0008.tab.txt	1	3	64	8.198	81	0.935	66	0.901	1.22727	73.5	NA
MS2/MCP	bcdGFP_st9	2015-06-26	Profiler (radius=10, n=0) : bcdGFP_WT_st9_0008.tab.txt	1	3	88	8.416	78	0.883	50	0.841	1.56	64	NA
MS2/MCP	bcdGFP_st9	2015-06-26	Profiler (radius=10, n=0) : bcdGFP_WT_st9_0010.tab.txt	1	4	7	2.464	118	0.948	158	0.898	0.746835	138	NA
MS2/MCP	bcdGFP_st9	2015-06-26	Profiler (radius=10, n=0) : bcdGFP_WT_st9_0010.tab.txt	1	4	20	1.602	132	0.889	84	0.902	1.57143	108	NA
MS2/MCP	bcdGFP_st9	2015-06-26	Profiler (radius=10, n=0) : bcdGFP_WT_st9_0010.tab.txt	1	4	27	5.76	124	0.941	125	0.844	0.992	124.5	NA
MS2/MCP	bcdGFP_st9	2015-06-26	Profiler (radius=10, n=0) : bcdGFP_WT_st9_0010.tab.txt	1	4	33	2.566	79	0.832	112	0.959	0.705357	95.5	NA
MS2/MCP	bcdGFP_st9	2015-06-26	Profiler (radius=10, n=0) : bcdGFP_WT_st9_0010.tab.txt	1	4	35	4.662	162	0.949	112	0.93	1.44643	137	NA
MS2/MCP	bcdGFP_st9	2015-06-26	Profiler (radius=10, n=0) : bcdGFP_WT_st9_0010.tab.txt	1	4	49	1.57	103	0.923	78	0.862	1.32051	90.5	NA
MS2/MCP	bcdGFP_st9	2015-06-26	Profiler (radius=10, n=0) : bcdGFP_WT_st9_0010.tab.txt	1	4	56	1.837	100	0.941	115	0.976	0.869565	107.5	NA
MS2/MCP	bcdGFP_st9	2015-06-26	Profiler (radius=10, n=0) : bcdGFP_WT_st9_0010.tab.txt	1	4	62	1.861	57	0.891	99	0.881	0.575758	78	NA
MS2/MCP	bcdGFP_st9	2015-06-26	Profiler (radius=10, n=0) : bcdGFP_WT_st9_0010.tab.txt	1	4	77	4.858	99	0.916	77	0.938	1.28571	88	NA
MS2/MCP	bcdGFP_st9	2015-06-26	Profiler (radius=10, n=0) : bcdGFP_WT_st9_0010.tab.txt	1	4	177	6.414	63	0.832	79	0.905	0.797468	71	NA
MS2/MCP	bcdGFP_st9	2015-06-26	Profiler (radius=10, n=0) : bcdGFP_WT_st9_0013.tab.txt	1	5	1	0.068	96	0.945	95	0.968	1.01053	95.5	NA
MS2/MCP	bcdGFP_st9	2015-06-26	Profiler (radius=10, n=0) : bcdGFP_WT_st9_0013.tab.txt	1	5	4	2.94	125	0.943	206	0.914	0.606796	165.5	NA
MS2/MCP	bcdGFP_st9	2015-06-26	Profiler (radius=10, n=0) : bcdGFP_WT_st9_0013.tab.txt	1	5	6	6.717	122	0.957	147	0.843	0.829932	134.5	NA
MS2/MCP	bcdGFP_st9	2015-06-26	Profiler (radius=10, n=0) : bcdGFP_WT_st9_0013.tab.txt	1	5	15	2.562	93	0.948	159	0.845	0.584906	126	NA
MS2/MCP	bcdGFP_st9	2015-06-26	Profiler (radius=10, n=0) : bcdGFP_WT_st9_0013.tab.txt	1	5	20	0.115	197	0.847	154	0.955	1.27922	175.5	NA
MS2/MCP	bcdGFP_st9	2015-06-26	Profiler (radius=10, n=0) : bcdGFP_WT_st9_0013.tab.txt	1	5	22	5.165	177	0.966	106	0.955	1.66981	141.5	NA
MS2/MCP	bcdGFP_st9	2015-06-26	Profiler (radius=10, n=0) : bcdGFP_WT_st9_0013.tab.txt	1	5	23	8.384	176	0.953	178	0.977	0.988764	177	NA
MS2/MCP	bcdGFP_st9	2015-06-26	Profiler (radius=10, n=0) : bcdGFP_WT_st9_0013.tab.txt	1	5	40	3.917	83	0.806	109	0.896	0.761468	96	NA
MS2/MCP	bcdGFP_st9	2015-06-26	Profiler (radius=10, n=0) : bcdGFP_WT_st9_0013.tab.txt	1	5	43	4.098	208	0.853	144	0.825	1.44444	176	NA
MS2/MCP	bcdGFP_st9	2015-06-26	Profiler (radius=10, n=0) : bcdGFP_WT_st9_0013.tab.txt	1	5	82	5.68	140	0.946	129	0.99	1.08527	134.5	NA
MS2/MCP	bcdGFP_st9	2015-06-26	Profiler (radius=10, n=0) : bcdGFP_WT_st9_0013.tab.txt	1	5	106	6.819	102	0.841	57	0.886	1.78947	79.5	NA
MS2/MCP	bcdGFP_st9	2015-06-26	Profiler (radius=10, n=0) : bcdGFP_WT_st9_0013.tab.txt	1	5	110	7.69	92	0.863	142	0.809	0.647887	117	NA
MS2/MCP	bcdGFP_st9	2015-06-26	Profiler (radius=10, n=0) : bcdGFP_WT_st9_0013.tab.txt	1	5	172	10.529	67	0.847	45	0.936	1.48889	56	NA
MS2/MCP	bcdGFP_st9	2015-06-26	Profiler (radius=10, n=0) : bcdGFP_WT_st9_0017.tab.txt	2	1	4	1.869	157	0.991	218	0.846	0.720183	187.5	NA
MS2/MCP	bcdGFP_st9	2015-06-26	Profiler (radius=10, n=0) : bcdGFP_WT_st9_0017.tab.txt	2	1	5	2.401	111	0.964	130	0.904	0.853846	120.5	NA
MS2/MCP	bcdGFP_st9	2015-06-26	Profiler (radius=10, n=0) : bcdGFP_WT_st9_0017.tab.txt	2	1	11	4.196	144	0.978	135	0.939	1.06667	139.5	NA
MS2/MCP	bcdGFP_st9	2015-06-26	Profiler (radius=10, n=0) : bcdGFP_WT_st9_0017.tab.txt	2	1	39	7.25	115	0.969	102	0.97	1.12745	108.5	NA
MS2/MCP	bcdGFP_st9	2015-06-26	Profiler (radius=10, n=0) : bcdGFP_WT_st9_0017.tab.txt	2	1	54	1.559	120	0.908	211	0.936	0.56872	165.5	NA
MS2/MCP	bcdGFP_st9	2015-06-26	Profiler (radius=10, n=0) : bcdGFP_WT_st9_0017.tab.txt	2	1	56	4.979	209	0.855	105	0.893	1.99048	157	NA
MS2/MCP	bcdGFP_st9	2015-06-26	Profiler (radius=10, n=0) : bcdGFP_WT_st9_0017.tab.txt	2	1	60	5.587	153	0.977	238	0.938	0.642857	195.5	NA
MS2/MCP	bcdGFP_st9	2015-06-26	Profiler (radius=10, n=0) : bcdGFP_WT_st9_0017.tab.txt	2	1	73	3.673	173	0.983	265	0.877	0.65283	219	NA
MS2/MCP	bcdGFP_st9	2015-06-26	Profiler (radius=10, n=0) : bcdGFP_WT_st9_0017.tab.txt	2	1	92	3.648	145	0.95	142	0.845	1.02113	143.5	NA
MS2/MCP	bcdGFP_st9	2015-06-26	Profiler (radius=10, n=0) : bcdGFP_WT_st9_0017.tab.txt	2	1	100	3.707	145	0.971	146	0.943	0.993151	145.5	NA
MS2/MCP	bcdGFP_st9	2015-06-26	Profiler (radius=10, n=0) : bcdGFP_WT_st9_0017.tab.txt	2	1	124	3.664	132	0.902	108	0.87	1.22222	120	NA
MS2/MCP	bcdGFP_st9	2015-06-26	Profiler (radius=10, n=0) : bcdGFP_WT_st9_0017.tab.txt	2	1	152	4.002	93	0.805	127	0.917	0.732283	110	NA
MS2/MCP	bcdGFP_st9	2015-06-26	Profiler (radius=10, n=0) : bcdGFP_WT_st9_0017.tab.txt	2	1	173	0.448	148	0.807	188	0.877	0.787234	168	NA
MS2/MCP	bcdGFP_st9	2015-06-26	Profiler (radius=10, n=0) : bcdGFP_WT_st9_0017.tab.txt	2	1	210	7.483	143	0.97	148	0.952	0.966216	145.5	NA
MS2/MCP	bcdGFP_st9	2015-06-26	Profiler (radius=10, n=0) : bcdGFP_WT_st9_0017.tab.txt	2	1	237	6.708	81	0.844	106	0.856	0.764151	93.5	NA
MS2/MCP	bcdGFP_st9	2015-06-26	Profiler (radius=10, n=0) : bcdGFP_WT_st9_0023.tab.txt	2	3	0	NA	190	0.957	169	0.987	1.12426	179.5	NA
MS2/MCP	bcdGFP_st9	2015-06-26	Profiler (radius=10, n=0) : bcdGFP_WT_st9_0023.tab.txt	2	3	51	NA	159	0.819	161	0.953	0.987578	160	NA
MS2/MCP	bcdGFP_st9	2015-06-26	Profiler (radius=10, n=0) : bcdGFP_WT_st9_0023.tab.txt	2	3	67	NA	108	0.846	126	0.915	0.857143	117	NA
MS2/MCP	bcdGFP_st9	2015-06-26	Profiler (radius=10, n=0) : bcdGFP_WT_st9_0023.tab.txt	2	3	84	NA	147	0.927	279	0.957	0.526882	213	NA
MS2/MCP	bcdGFP_st9	2015-06-26	Profiler (radius=10, n=0) : bcdGFP_WT_st9_0023.tab.txt	2	3	85	NA	142	0.819	209	0.859	0.679426	175.5	NA
MS2/MCP	bcdGFP_st9	2015-06-26	Profiler (radius=10, n=0) : bcdGFP_WT_st9_0023.tab.txt	2	3	91	NA	106	0.962	188	0.945	0.56383	147	NA
MS2/MCP	bcdGFP_st9	2015-06-26	Profiler (radius=10, n=0) : bcdGFP_WT_st9_0023.tab.txt	2	3	95	NA	187	0.858	130	0.945	1.43846	158.5	NA
MS2/MCP	bcdGFP_st9	2015-06-26	Profiler (radius=10, n=0) : bcdGFP_WT_st9_0023.tab.txt	2	3	120	NA	232	0.9	131	0.9	1.77099	181.5	NA
MS2/MCP	bcdGFP_st9	2015-06-26	Profiler (radius=10, n=0) : bcdGFP_WT_st9_0023.tab.txt	2	3	129	NA	163	0.962	182	0.804	0.895604	172.5	NA
MS2/MCP	bcdGFP_st9	2015-06-26	Profiler (radius=10, n=0) : bcdGFP_WT_st9_0023.tab.txt	2	3	135	NA	99	0.957	77	0.912	1.28571	88	NA
MS2/MCP	bcdGFP_st9	2015-06-26	Profiler (radius=10, n=0) : bcdGFP_WT_st9_0023.tab.txt	2	3	166	NA	145	0.968	179	0.857	0.810056	162	NA
MS2/MCP	bcdGFP_st9	2015-06-26	Profiler (radius=10, n=0) : bcdGFP_WT_st9_0023.tab.txt	2	3	190	NA	127	0.933	119	0.953	1.06723	123	NA
MS2/MCP	bcdGFP_st9	2015-06-26	Profiler (radius=10, n=0) : bcdGFP_WT_st9_0023.tab.txt	2	3	204	NA	185	0.933	248	0.896	0.745968	216.5	NA
MS2/MCP	bcdGFP_st9	2015-06-26	Profiler (radius=10, n=0) : bcdGFP_WT_st9_0023.tab.txt	2	3	228	NA	210	0.909	134	0.93	1.56716	172	NA
MS2/MCP	bcdGFP_st9	2015-06-26	Profiler (radius=10, n=0) : bcdGFP_WT_st9_0023.tab.txt	2	3	259	NA	53	0.941	53	0.908	1	53	NA
MS2/MCP	bcdGFP_st9	2015-06-26	Profiler (radius=10, n=0) : bcdGFP_WT_st9_0023.tab.txt	2	3	291	NA	162	0.881	157	0.893	1.03185	159.5	NA
MS2/MCP	bcdGFP_st9	2015-06-26	Profiler (radius=10, n=0) : bcdGFP_WT_st9_0026.tab.txt	2	4	0	5.925	190	0.95	151	0.861	1.25828	170.5	NA
MS2/MCP	bcdGFP_st9	2015-06-26	Profiler (radius=10, n=0) : bcdGFP_WT_st9_0026.tab.txt	2	4	30	6.825	136	0.935	104	0.915	1.30769	120	NA
MS2/MCP	bcdGFP_st9	2015-06-26	Profiler (radius=10, n=0) : bcdGFP_WT_st9_0026.tab.txt	2	4	35	5.758	247	0.877	208	0.962	1.1875	227.5	NA
MS2/MCP	bcdGFP_st9	2015-06-26	Profiler (radius=10, n=0) : bcdGFP_WT_st9_0026.tab.txt	2	4	47	8.82	165	0.884	149	0.98	1.10738	157	NA
MS2/MCP	bcdGFP_st9	2015-06-26	Profiler (radius=10, n=0) : bcdGFP_WT_st9_0026.tab.txt	2	4	50	9.38	108	0.967	162	0.955	0.666667	135	NA
MS2/MCP	bcdGFP_st9	2015-06-26	Profiler (radius=10, n=0) : bcdGFP_WT_st9_0026.tab.txt	2	4	51	12.021	137	0.95	214	0.883	0.640187	175.5	NA
MS2/MCP	bcdGFP_st9	2015-06-26	Profiler (radius=10, n=0) : bcdGFP_WT_st9_0026.tab.txt	2	4	58	1.892	179	0.827	148	0.842	1.20946	163.5	NA
MS2/MCP	bcdGFP_st9	2015-06-26	Profiler (radius=10, n=0) : bcdGFP_WT_st9_0026.tab.txt	2	4	68	12.354	175	0.937	152	0.913	1.15132	163.5	NA
MS2/MCP	bcdGFP_st9	2015-06-26	Profiler (radius=10, n=0) : bcdGFP_WT_st9_0026.tab.txt	2	4	79	6.661	106	0.815	159	0.994	0.666667	132.5	NA
MS2/MCP	bcdGFP_st9	2015-06-26	Profiler (radius=10, n=0) : bcdGFP_WT_st9_0026.tab.txt	2	4	83	6.128	133	0.965	176	0.836	0.755682	154.5	NA
MS2/MCP	bcdGFP_st9	2015-06-26	Profiler (radius=10, n=0) : bcdGFP_WT_st9_0026.tab.txt	2	4	99	9.648	139	0.964	121	0.916	1.14876	130	NA
MS2/MCP	bcdGFP_st9	2015-06-26	Profiler (radius=10, n=0) : bcdGFP_WT_st9_0026.tab.txt	2	4	120	10.864	106	0.934	112	0.886	0.946429	109	NA
MS2/MCP	bcdGFP_st9	2015-06-26	Profiler (radius=10, n=0) : bcdGFP_WT_st9_0026.tab.txt	2	4	133	10.155	193	0.887	180	0.959	1.07222	186.5	NA
MS2/MCP	bcdGFP_st9	2015-06-26	Profiler (radius=10, n=0) : bcdGFP_WT_st9_0026.tab.txt	2	4	137	1.113	102	0.959	176	0.98	0.579545	139	NA
MS2/MCP	bcdGFP_st9	2015-06-26	Profiler (radius=10, n=0) : bcdGFP_WT_st9_0026.tab.txt	2	4	149	9.594	127	0.966	163	0.808	0.779141	145	NA
MS2/MCP	bcdGFP_st9	2015-06-26	Profiler (radius=10, n=0) : bcdGFP_WT_st9_0026.tab.txt	2	4	168	8.965	109	0.979	208	0.948	0.524038	158.5	NA
MS2/MCP	bcdGFP_st9	2015-06-26	Profiler (radius=10, n=0) : bcdGFP_WT_st9_0026.tab.txt	2	4	197	6.06	128	0.886	127	0.965	1.00787	127.5	NA
MS2/MCP	bcdGFP_st9	2015-06-26	Profiler (radius=10, n=0) : bcdGFP_WT_st9_0026.tab.txt	2	4	236	4.398	89	0.827	73	0.943	1.21918	81	NA
MS2/MCP	bcdGFP_st9	2015-06-26	Profiler (radius=10, n=0) : bcdGFP_WT_st9_0026.tab.txt	2	4	266	7.418	122	0.886	80	0.843	1.525	101	NA
MS2/MCP	bcdGFP_st9	2015-06-26	Profiler (radius=10, n=0) : bcdGFP_WT_st9_0026.tab.txt	2	4	340	8.836	141	0.88	96	0.944	1.46875	118.5	NA
MS2/MCP	bcdGFP_st9	2015-06-26	Profiler (radius=10, n=0) : bcdGFP_WT_st9_0028.tab.txt	3	1	4	NA	195	0.982	159	0.986	1.22642	177	NA
MS2/MCP	bcdGFP_st9	2015-06-26	Profiler (radius=10, n=0) : bcdGFP_WT_st9_0028.tab.txt	3	1	5	NA	112	0.921	133	0.969	0.842105	122.5	NA
MS2/MCP	bcdGFP_st9	2015-06-26	Profiler (radius=10, n=0) : bcdGFP_WT_st9_0028.tab.txt	3	1	11	NA	90	0.973	97	0.956	0.927835	93.5	NA
MS2/MCP	bcdGFP_st9	2015-06-26	Profiler (radius=10, n=0) : bcdGFP_WT_st9_0028.tab.txt	3	1	18	NA	103	0.99	119	0.984	0.865546	111	NA
MS2/MCP	bcdGFP_st9	2015-06-26	Profiler (radius=10, n=0) : bcdGFP_WT_st9_0028.tab.txt	3	1	19	NA	84	0.926	77	0.968	1.09091	80.5	NA
MS2/MCP	bcdGFP_st9	2015-06-26	Profiler (radius=10, n=0) : bcdGFP_WT_st9_0028.tab.txt	3	1	21	NA	128	0.958	101	0.954	1.26733	114.5	NA
MS2/MCP	bcdGFP_st9	2015-06-26	Profiler (radius=10, n=0) : bcdGFP_WT_st9_0028.tab.txt	3	1	24	NA	111	0.946	154	0.976	0.720779	132.5	NA
MS2/MCP	bcdGFP_st9	2015-06-26	Profiler (radius=10, n=0) : bcdGFP_WT_st9_0028.tab.txt	3	1	25	NA	154	0.975	92	0.935	1.67391	123	NA
MS2/MCP	bcdGFP_st9	2015-06-26	Profiler (radius=10, n=0) : bcdGFP_WT_st9_0028.tab.txt	3	1	35	NA	157	0.869	102	0.955	1.53922	129.5	NA
MS2/MCP	bcdGFP_st9	2015-06-26	Profiler (radius=10, n=0) : bcdGFP_WT_st9_0028.tab.txt	3	1	37	NA	103	0.915	99	0.953	1.0404	101	NA
MS2/MCP	bcdGFP_st9	2015-06-26	Profiler (radius=10, n=0) : bcdGFP_WT_st9_0028.tab.txt	3	1	43	NA	71	0.866	87	0.876	0.816092	79	NA
MS2/MCP	bcdGFP_st9	2015-06-26	Profiler (radius=10, n=0) : bcdGFP_WT_st9_0028.tab.txt	3	1	75	NA	97	0.962	112	0.976	0.866071	104.5	NA
MS2/MCP	bcdGFP_st9	2015-06-26	Profiler (radius=10, n=0) : bcdGFP_WT_st9_0028.tab.txt	3	1	110	NA	65	0.861	71	0.94	0.915493	68	NA
MS2/MCP	bcdGFP_st9	2015-06-26	Profiler (radius=10, n=0) : bcdGFP_WT_st9_0028.tab.txt	3	1	112	NA	88	0.849	68	0.862	1.29412	78	NA
MS2/MCP	bcdGFP_st9	2015-06-26	Profiler (radius=10, n=0) : bcdGFP_WT_st9_0028.tab.txt	3	1	166	NA	107	0.886	179	0.955	0.597765	143	NA
MS2/MCP	bcdGFP_st9	2015-06-26	Profiler (radius=10, n=0) : bcdGFP_WT_st9_0028.tab.txt	3	1	290	NA	118	0.826	159	0.905	0.742138	138.5	NA
MS2/MCP	bcdGFP_st9	2015-06-26	Profiler (radius=10, n=0) : bcdGFP_WT_st9_0033.tab.txt	4	1	1	3.66	115	0.93	119	0.925	0.966387	117	NA
MS2/MCP	bcdGFP_st9	2015-06-26	Profiler (radius=10, n=0) : bcdGFP_WT_st9_0033.tab.txt	4	1	12	3.089	167	0.855	121	0.962	1.38017	144	NA
MS2/MCP	bcdGFP_st9	2015-06-26	Profiler (radius=10, n=0) : bcdGFP_WT_st9_0033.tab.txt	4	1	22	3.744	87	0.978	87	0.94	1	87	NA
MS2/MCP	bcdGFP_st9	2015-06-26	Profiler (radius=10, n=0) : bcdGFP_WT_st9_0033.tab.txt	4	1	23	2.958	166	0.996	104	0.804	1.59615	135	NA
MS2/MCP	bcdGFP_st9	2015-06-26	Profiler (radius=10, n=0) : bcdGFP_WT_st9_0033.tab.txt	4	1	31	4.68	132	0.941	173	0.936	0.763006	152.5	NA
MS2/MCP	bcdGFP_st9	2015-06-26	Profiler (radius=10, n=0) : bcdGFP_WT_st9_0033.tab.txt	4	1	32	5.008	92	0.944	123	0.912	0.747967	107.5	NA
MS2/MCP	bcdGFP_st9	2015-06-26	Profiler (radius=10, n=0) : bcdGFP_WT_st9_0033.tab.txt	4	1	33	3.489	133	0.945	134	0.984	0.992537	133.5	NA
MS2/MCP	bcdGFP_st9	2015-06-26	Profiler (radius=10, n=0) : bcdGFP_WT_st9_0033.tab.txt	4	1	35	3.773	116	0.969	104	0.977	1.11538	110	NA
MS2/MCP	bcdGFP_st9	2015-06-26	Profiler (radius=10, n=0) : bcdGFP_WT_st9_0033.tab.txt	4	1	40	0.733	141	0.982	127	0.971	1.11024	134	NA
MS2/MCP	bcdGFP_st9	2015-06-26	Profiler (radius=10, n=0) : bcdGFP_WT_st9_0033.tab.txt	4	1	49	3.349	93	0.865	129	0.903	0.72093	111	NA
MS2/MCP	bcdGFP_st9	2015-06-26	Profiler (radius=10, n=0) : bcdGFP_WT_st9_0033.tab.txt	4	1	56	6.23	143	0.935	154	0.913	0.928571	148.5	NA
MS2/MCP	bcdGFP_st9	2015-06-26	Profiler (radius=10, n=0) : bcdGFP_WT_st9_0033.tab.txt	4	1	59	2.125	154	0.893	123	0.983	1.25203	138.5	NA
MS2/MCP	bcdGFP_st9	2015-06-26	Profiler (radius=10, n=0) : bcdGFP_WT_st9_0033.tab.txt	4	1	76	2.373	89	0.98	120	0.989	0.741667	104.5	NA
MS2/MCP	bcdGFP_st9	2015-06-26	Profiler (radius=10, n=0) : bcdGFP_WT_st9_0033.tab.txt	4	1	77	6.73	118	0.907	110	0.908	1.07273	114	NA
MS2/MCP	bcdGFP_st9	2015-06-26	Profiler (radius=10, n=0) : bcdGFP_WT_st9_0033.tab.txt	4	1	80	3.934	108	0.879	98	0.947	1.10204	103	NA
MS2/MCP	bcdGFP_st9	2015-06-26	Profiler (radius=10, n=0) : bcdGFP_WT_st9_0033.tab.txt	4	1	89	2.445	73	0.872	126	0.837	0.579365	99.5	NA
MS2/MCP	bcdGFP_st9	2015-06-26	Profiler (radius=10, n=0) : bcdGFP_WT_st9_0033.tab.txt	4	1	92	6.761	92	0.961	126	0.972	0.730159	109	NA
MS2/MCP	bcdGFP_st9	2015-06-26	Profiler (radius=10, n=0) : bcdGFP_WT_st9_0033.tab.txt	4	1	96	1.676	164	0.898	98	0.993	1.67347	131	NA
MS2/MCP	bcdGFP_st9	2015-06-26	Profiler (radius=10, n=0) : bcdGFP_WT_st9_0033.tab.txt	4	1	101	1.437	158	0.927	111	0.974	1.42342	134.5	NA
MS2/MCP	bcdGFP_st9	2015-06-26	Profiler (radius=10, n=0) : bcdGFP_WT_st9_0033.tab.txt	4	1	102	3.208	158	0.847	120	0.986	1.31667	139	NA
MS2/MCP	bcdGFP_st9	2015-06-26	Profiler (radius=10, n=0) : bcdGFP_WT_st9_0033.tab.txt	4	1	104	3.804	114	0.941	123	0.886	0.926829	118.5	NA
MS2/MCP	bcdGFP_st9	2015-06-26	Profiler (radius=10, n=0) : bcdGFP_WT_st9_0033.tab.txt	4	1	106	2.312	152	0.864	132	0.961	1.15152	142	NA
MS2/MCP	bcdGFP_st9	2015-06-26	Profiler (radius=10, n=0) : bcdGFP_WT_st9_0033.tab.txt	4	1	108	8.33	165	0.964	121	0.986	1.36364	143	NA
MS2/MCP	bcdGFP_st9	2015-06-26	Profiler (radius=10, n=0) : bcdGFP_WT_st9_0033.tab.txt	4	1	114	4.4	147	0.804	101	0.941	1.45545	124	NA
MS2/MCP	bcdGFP_st9	2015-06-26	Profiler (radius=10, n=0) : bcdGFP_WT_st9_0033.tab.txt	4	1	121	6.843	129	0.982	91	0.97	1.41758	110	NA
MS2/MCP	bcdGFP_st9	2015-06-26	Profiler (radius=10, n=0) : bcdGFP_WT_st9_0033.tab.txt	4	1	128	5.228	138	0.961	99	0.986	1.39394	118.5	NA
MS2/MCP	bcdGFP_st9	2015-06-26	Profiler (radius=10, n=0) : bcdGFP_WT_st9_0033.tab.txt	4	1	132	3.51	122	0.978	145	0.837	0.841379	133.5	NA
MS2/MCP	bcdGFP_st9	2015-06-26	Profiler (radius=10, n=0) : bcdGFP_WT_st9_0033.tab.txt	4	1	134	10.171	108	0.981	103	0.925	1.04854	105.5	NA
MS2/MCP	bcdGFP_st9	2015-06-26	Profiler (radius=10, n=0) : bcdGFP_WT_st9_0033.tab.txt	4	1	149	4.938	85	0.92	115	0.851	0.73913	100	NA
MS2/MCP	bcdGFP_st9	2015-06-26	Profiler (radius=10, n=0) : bcdGFP_WT_st9_0033.tab.txt	4	1	150	8.462	106	0.964	81	0.977	1.30864	93.5	NA
MS2/MCP	bcdGFP_st9	2015-06-26	Profiler (radius=10, n=0) : bcdGFP_WT_st9_0033.tab.txt	4	1	156	2.911	84	0.908	115	0.953	0.730435	99.5	NA
MS2/MCP	bcdGFP_st9	2015-06-26	Profiler (radius=10, n=0) : bcdGFP_WT_st9_0033.tab.txt	4	1	158	4.198	105	0.94	113	0.966	0.929204	109	NA
MS2/MCP	bcdGFP_st9	2015-06-26	Profiler (radius=10, n=0) : bcdGFP_WT_st9_0033.tab.txt	4	1	159	5.894	77	0.926	65	0.977	1.18462	71	NA
MS2/MCP	bcdGFP_st9	2015-06-26	Profiler (radius=10, n=0) : bcdGFP_WT_st9_0033.tab.txt	4	1	167	5.361	95	0.913	121	0.985	0.785124	108	NA
MS2/MCP	bcdGFP_st9	2015-06-26	Profiler (radius=10, n=0) : bcdGFP_WT_st9_0033.tab.txt	4	1	175	5.464	81	0.953	147	0.987	0.55102	114	NA
MS2/MCP	bcdGFP_st9	2015-06-26	Profiler (radius=10, n=0) : bcdGFP_WT_st9_0033.tab.txt	4	1	177	7.597	146	0.933	115	0.917	1.26957	130.5	NA
MS2/MCP	bcdGFP_st9	2015-06-26	Profiler (radius=10, n=0) : bcdGFP_WT_st9_0033.tab.txt	4	1	186	7.249	119	0.879	101	0.9	1.17822	110	NA
MS2/MCP	bcdGFP_st9	2015-06-26	Profiler (radius=10, n=0) : bcdGFP_WT_st9_0033.tab.txt	4	1	192	3.387	195	0.955	99	0.899	1.9697	147	NA
MS2/MCP	bcdGFP_st9	2015-06-26	Profiler (radius=10, n=0) : bcdGFP_WT_st9_0033.tab.txt	4	1	193	4.92	66	0.951	89	0.9	0.741573	77.5	NA
MS2/MCP	bcdGFP_st9	2015-06-26	Profiler (radius=10, n=0) : bcdGFP_WT_st9_0033.tab.txt	4	1	210	3.018	77	0.869	97	0.956	0.793814	87	NA
MS2/MCP	bcdGFP_st9	2015-06-26	Profiler (radius=10, n=0) : bcdGFP_WT_st9_0033.tab.txt	4	1	224	4.031	87	0.905	67	0.847	1.29851	77	NA
MS2/MCP	bcdGFP_st9	2015-06-26	Profiler (radius=10, n=0) : bcdGFP_WT_st9_0033.tab.txt	4	1	303	10.885	74	0.961	81	0.866	0.91358	77.5	NA
MS2/MCP	bcdGFP_st9	2015-06-26	Profiler (radius=10, n=0) : bcdGFP_WT_st9_0036.tab.txt	4	2	0	2.402	142	0.829	196	0.901	0.72449	169	NA
MS2/MCP	bcdGFP_st9	2015-06-26	Profiler (radius=10, n=0) : bcdGFP_WT_st9_0036.tab.txt	4	2	28	6.35	197	0.841	113	0.933	1.74336	155	NA
MS2/MCP	bcdGFP_st9	2015-06-26	Profiler (radius=10, n=0) : bcdGFP_WT_st9_0036.tab.txt	4	2	32	2.307	120	0.81	136	0.882	0.882353	128	NA
MS2/MCP	bcdGFP_st9	2015-06-26	Profiler (radius=10, n=0) : bcdGFP_WT_st9_0036.tab.txt	4	2	42	2.661	140	0.925	200	0.975	0.7	170	NA
MS2/MCP	bcdGFP_st9	2015-06-26	Profiler (radius=10, n=0) : bcdGFP_WT_st9_0036.tab.txt	4	2	44	2.293	85	0.954	158	0.834	0.537975	121.5	NA
MS2/MCP	bcdGFP_st9	2015-06-26	Profiler (radius=10, n=0) : bcdGFP_WT_st9_0036.tab.txt	4	2	52	1.021	88	0.916	150	0.971	0.586667	119	NA
MS2/MCP	bcdGFP_st9	2015-06-26	Profiler (radius=10, n=0) : bcdGFP_WT_st9_0036.tab.txt	4	2	57	2.791	77	0.944	85	0.964	0.905882	81	NA
MS2/MCP	bcdGFP_st9	2015-06-26	Profiler (radius=10, n=0) : bcdGFP_WT_st9_0036.tab.txt	4	2	68	5.046	137	0.991	99	0.974	1.38384	118	NA
MS2/MCP	bcdGFP_st9	2015-06-26	Profiler (radius=10, n=0) : bcdGFP_WT_st9_0036.tab.txt	4	2	69	1.966	99	0.933	131	0.981	0.755725	115	NA
MS2/MCP	bcdGFP_st9	2015-06-26	Profiler (radius=10, n=0) : bcdGFP_WT_st9_0036.tab.txt	4	2	80	9.318	95	0.914	85	0.986	1.11765	90	NA
MS2/MCP	bcdGFP_st9	2015-06-26	Profiler (radius=10, n=0) : bcdGFP_WT_st9_0036.tab.txt	4	2	83	7.256	104	0.984	111	0.991	0.936937	107.5	NA
MS2/MCP	bcdGFP_st9	2015-06-26	Profiler (radius=10, n=0) : bcdGFP_WT_st9_0036.tab.txt	4	2	84	6.409	196	0.917	101	0.93	1.94059	148.5	NA
MS2/MCP	bcdGFP_st9	2015-06-26	Profiler (radius=10, n=0) : bcdGFP_WT_st9_0036.tab.txt	4	2	91	2.782	109	0.975	193	0.859	0.564767	151	NA
MS2/MCP	bcdGFP_st9	2015-06-26	Profiler (radius=10, n=0) : bcdGFP_WT_st9_0036.tab.txt	4	2	92	1.027	94	0.952	67	0.834	1.40299	80.5	NA
MS2/MCP	bcdGFP_st9	2015-06-26	Profiler (radius=10, n=0) : bcdGFP_WT_st9_0036.tab.txt	4	2	93	7.306	97	0.959	102	0.884	0.95098	99.5	NA
MS2/MCP	bcdGFP_st9	2015-06-26	Profiler (radius=10, n=0) : bcdGFP_WT_st9_0036.tab.txt	4	2	95	7.768	132	0.971	125	0.95	1.056	128.5	NA
MS2/MCP	bcdGFP_st9	2015-06-26	Profiler (radius=10, n=0) : bcdGFP_WT_st9_0036.tab.txt	4	2	96	3.15	118	0.899	111	0.889	1.06306	114.5	NA
MS2/MCP	bcdGFP_st9	2015-06-26	Profiler (radius=10, n=0) : bcdGFP_WT_st9_0036.tab.txt	4	2	101	3.523	72	0.885	80	0.939	0.9	76	NA
MS2/MCP	bcdGFP_st9	2015-06-26	Profiler (radius=10, n=0) : bcdGFP_WT_st9_0036.tab.txt	4	2	104	6.08	116	0.971	115	0.855	1.0087	115.5	NA
MS2/MCP	bcdGFP_st9	2015-06-26	Profiler (radius=10, n=0) : bcdGFP_WT_st9_0036.tab.txt	4	2	112	2.589	163	0.951	127	0.872	1.28346	145	NA
MS2/MCP	bcdGFP_st9	2015-06-26	Profiler (radius=10, n=0) : bcdGFP_WT_st9_0036.tab.txt	4	2	122	0.409	126	0.965	98	0.972	1.28571	112	NA
MS2/MCP	bcdGFP_st9	2015-06-26	Profiler (radius=10, n=0) : bcdGFP_WT_st9_0036.tab.txt	4	2	123	2.479	145	0.861	88	0.859	1.64773	116.5	NA
MS2/MCP	bcdGFP_st9	2015-06-26	Profiler (radius=10, n=0) : bcdGFP_WT_st9_0036.tab.txt	4	2	128	2.991	93	0.953	107	0.964	0.869159	100	NA
MS2/MCP	bcdGFP_st9	2015-06-26	Profiler (radius=10, n=0) : bcdGFP_WT_st9_0036.tab.txt	4	2	130	7.627	94	0.969	88	0.938	1.06818	91	NA
MS2/MCP	bcdGFP_st9	2015-06-26	Profiler (radius=10, n=0) : bcdGFP_WT_st9_0036.tab.txt	4	2	141	6.829	154	0.929	106	0.943	1.45283	130	NA
MS2/MCP	bcdGFP_st9	2015-06-26	Profiler (radius=10, n=0) : bcdGFP_WT_st9_0036.tab.txt	4	2	145	2.661	113	0.822	80	0.815	1.4125	96.5	NA
MS2/MCP	bcdGFP_st9	2015-06-26	Profiler (radius=10, n=0) : bcdGFP_WT_st9_0036.tab.txt	4	2	150	6.307	109	0.904	105	0.944	1.0381	107	NA
MS2/MCP	bcdGFP_st9	2015-06-26	Profiler (radius=10, n=0) : bcdGFP_WT_st9_0036.tab.txt	4	2	155	1.81	67	0.945	89	0.917	0.752809	78	NA
MS2/MCP	bcdGFP_st9	2015-06-26	Profiler (radius=10, n=0) : bcdGFP_WT_st9_0036.tab.txt	4	2	162	0.976	87	0.985	112	0.954	0.776786	99.5	NA
MS2/MCP	bcdGFP_st9	2015-06-26	Profiler (radius=10, n=0) : bcdGFP_WT_st9_0036.tab.txt	4	2	171	6.603	85	0.907	106	0.904	0.801887	95.5	NA
MS2/MCP	bcdGFP_st9	2015-06-26	Profiler (radius=10, n=0) : bcdGFP_WT_st9_0036.tab.txt	4	2	191	8.504	98	0.896	91	0.981	1.07692	94.5	NA
MS2/MCP	bcdGFP_st9	2015-06-26	Profiler (radius=10, n=0) : bcdGFP_WT_st9_0036.tab.txt	4	2	192	6.71	123	0.894	72	0.941	1.70833	97.5	NA
MS2/MCP	bcdGFP_st9	2015-06-26	Profiler (radius=10, n=0) : bcdGFP_WT_st9_0036.tab.txt	4	2	195	0.437	98	0.988	196	0.927	0.5	147	NA
MS2/MCP	bcdGFP_st9	2015-06-26	Profiler (radius=10, n=0) : bcdGFP_WT_st9_0036.tab.txt	4	2	202	4.669	69	0.897	98	0.851	0.704082	83.5	NA
MS2/MCP	bcdGFP_st9	2015-06-26	Profiler (radius=10, n=0) : bcdGFP_WT_st9_0036.tab.txt	4	2	211	0.476	100	0.954	117	0.894	0.854701	108.5	NA
MS2/MCP	bcdGFP_st9	2015-06-26	Profiler (radius=10, n=0) : bcdGFP_WT_st9_0036.tab.txt	4	2	217	5.376	85	0.958	76	0.968	1.11842	80.5	NA
MS2/MCP	bcdGFP_st9	2015-06-26	Profiler (radius=10, n=0) : bcdGFP_WT_st9_0036.tab.txt	4	2	220	9.103	101	0.948	101	0.89	1	101	NA
MS2/MCP	bcdGFP_st9	2015-06-26	Profiler (radius=10, n=0) : bcdGFP_WT_st9_0036.tab.txt	4	2	226	9.448	99	0.885	149	0.949	0.66443	124	NA
MS2/MCP	bcdGFP_st9	2015-06-26	Profiler (radius=10, n=0) : bcdGFP_WT_st9_0036.tab.txt	4	2	233	2.259	86	0.933	92	0.877	0.934783	89	NA
MS2/MCP	bcdGFP_st9	2015-06-26	Profiler (radius=10, n=0) : bcdGFP_WT_st9_0036.tab.txt	4	2	248	6.937	163	0.987	87	0.98	1.87356	125	NA
MS2/MCP	bcdGFP_st9	2015-06-26	Profiler (radius=10, n=0) : bcdGFP_WT_st9_0036.tab.txt	4	2	286	6.918	209	0.852	107	0.943	1.95327	158	NA
MS2/MCP	bcdGFP_st9	2015-06-26	Profiler (radius=10, n=0) : bcdGFP_WT_st9_0042.tab.txt	4	4	11	2.161	133	0.981	138	0.951	0.963768	135.5	NA
MS2/MCP	bcdGFP_st9	2015-06-26	Profiler (radius=10, n=0) : bcdGFP_WT_st9_0042.tab.txt	4	4	13	10.868	148	0.849	155	0.971	0.954839	151.5	NA
MS2/MCP	bcdGFP_st9	2015-06-26	Profiler (radius=10, n=0) : bcdGFP_WT_st9_0042.tab.txt	4	4	16	8.854	138	0.905	112	0.983	1.23214	125	NA
MS2/MCP	bcdGFP_st9	2015-06-26	Profiler (radius=10, n=0) : bcdGFP_WT_st9_0042.tab.txt	4	4	19	6.19	128	0.96	124	0.971	1.03226	126	NA
MS2/MCP	bcdGFP_st9	2015-06-26	Profiler (radius=10, n=0) : bcdGFP_WT_st9_0042.tab.txt	4	4	29	5.616	91	0.977	89	0.878	1.02247	90	NA
MS2/MCP	bcdGFP_st9	2015-06-26	Profiler (radius=10, n=0) : bcdGFP_WT_st9_0042.tab.txt	4	4	34	1.231	75	0.977	90	0.914	0.833333	82.5	NA
MS2/MCP	bcdGFP_st9	2015-06-26	Profiler (radius=10, n=0) : bcdGFP_WT_st9_0042.tab.txt	4	4	35	4.57	127	0.819	71	0.921	1.78873	99	NA
MS2/MCP	bcdGFP_st9	2015-06-26	Profiler (radius=10, n=0) : bcdGFP_WT_st9_0042.tab.txt	4	4	37	8.54	118	0.978	114	0.946	1.03509	116	NA
MS2/MCP	bcdGFP_st9	2015-06-26	Profiler (radius=10, n=0) : bcdGFP_WT_st9_0042.tab.txt	4	4	42	2.671	69	0.983	101	0.96	0.683168	85	NA
MS2/MCP	bcdGFP_st9	2015-06-26	Profiler (radius=10, n=0) : bcdGFP_WT_st9_0042.tab.txt	4	4	53	7.497	125	0.822	106	0.907	1.17925	115.5	NA
MS2/MCP	bcdGFP_st9	2015-06-26	Profiler (radius=10, n=0) : bcdGFP_WT_st9_0042.tab.txt	4	4	54	7.952	68	0.908	91	0.88	0.747253	79.5	NA
MS2/MCP	bcdGFP_st9	2015-06-26	Profiler (radius=10, n=0) : bcdGFP_WT_st9_0042.tab.txt	4	4	55	1.216	131	0.876	102	0.979	1.28431	116.5	NA
MS2/MCP	bcdGFP_st9	2015-06-26	Profiler (radius=10, n=0) : bcdGFP_WT_st9_0042.tab.txt	4	4	58	7.607	136	0.946	98	0.971	1.38776	117	NA
MS2/MCP	bcdGFP_st9	2015-06-26	Profiler (radius=10, n=0) : bcdGFP_WT_st9_0042.tab.txt	4	4	61	8.321	118	0.982	91	0.971	1.2967	104.5	NA
MS2/MCP	bcdGFP_st9	2015-06-26	Profiler (radius=10, n=0) : bcdGFP_WT_st9_0042.tab.txt	4	4	68	2.033	75	0.93	119	0.878	0.630252	97	NA
MS2/MCP	bcdGFP_st9	2015-06-26	Profiler (radius=10, n=0) : bcdGFP_WT_st9_0042.tab.txt	4	4	73	5.113	112	0.858	101	0.902	1.10891	106.5	NA
MS2/MCP	bcdGFP_st9	2015-06-26	Profiler (radius=10, n=0) : bcdGFP_WT_st9_0042.tab.txt	4	4	82	4.268	108	0.91	89	0.918	1.21348	98.5	NA
MS2/MCP	bcdGFP_st9	2015-06-26	Profiler (radius=10, n=0) : bcdGFP_WT_st9_0042.tab.txt	4	4	86	1.032	137	0.935	79	0.902	1.73418	108	NA
MS2/MCP	bcdGFP_st9	2015-06-26	Profiler (radius=10, n=0) : bcdGFP_WT_st9_0042.tab.txt	4	4	108	10.07	93	0.876	95	0.964	0.978947	94	NA
MS2/MCP	bcdGFP_st9	2015-06-26	Profiler (radius=10, n=0) : bcdGFP_WT_st9_0042.tab.txt	4	4	114	6.988	122	0.919	96	0.811	1.27083	109	NA
MS2/MCP	bcdGFP_st9	2015-06-26	Profiler (radius=10, n=0) : bcdGFP_WT_st9_0042.tab.txt	4	4	131	12.35	59	0.881	40	0.803	1.475	49.5	NA
MS2/MCP	bcdGFP_st9	2015-07-30	Profiler (radius=10, n=0) : bcdGFP-st9_0006.tab.txt	1	2	27	NA	137	0.862	139	0.97	0.985612	138	NA
MS2/MCP	bcdGFP_st9	2015-07-30	Profiler (radius=10, n=0) : bcdGFP-st9_0006.tab.txt	1	2	30	NA	151	0.875	134	0.967	1.12687	142.5	NA
MS2/MCP	bcdGFP_st9	2015-07-30	Profiler (radius=10, n=0) : bcdGFP-st9_0006.tab.txt	1	2	46	NA	76	0.859	72	0.92	1.05556	74	NA
MS2/MCP	bcdGFP_st9	2015-07-30	Profiler (radius=10, n=0) : bcdGFP-st9_0006.tab.txt	1	2	53	NA	143	0.962	171	0.882	0.836257	157	NA
MS2/MCP	bcdGFP_st9	2015-07-30	Profiler (radius=10, n=0) : bcdGFP-st9_0006.tab.txt	1	2	54	NA	105	0.992	126	0.95	0.833333	115.5	NA
MS2/MCP	bcdGFP_st9	2015-07-30	Profiler (radius=10, n=0) : bcdGFP-st9_0006.tab.txt	1	2	95	NA	163	0.848	108	0.955	1.50926	135.5	NA
MS2/MCP	bcdGFP_st9	2015-07-30	Profiler (radius=10, n=0) : bcdGFP-st9_0006.tab.txt	1	2	111	NA	50	0.83	90	0.906	0.555556	70	NA
MS2/MCP	bcdGFP_st9	2015-07-30	Profiler (radius=10, n=0) : bcdGFP-st9_0006.tab.txt	1	2	133	NA	138	0.932	108	0.91	1.27778	123	NA
MS2/MCP	bcdGFP_st9	2015-07-30	Profiler (radius=10, n=0) : bcdGFP-st9_0009.tab.txt	1	3	1	NA	97	0.851	151	0.825	0.642384	124	NA
MS2/MCP	bcdGFP_st9	2015-07-30	Profiler (radius=10, n=0) : bcdGFP-st9_0009.tab.txt	1	3	28	NA	147	0.92	155	0.933	0.948387	151	NA
MS2/MCP	bcdGFP_st9	2015-07-30	Profiler (radius=10, n=0) : bcdGFP-st9_0009.tab.txt	1	3	44	NA	71	0.89	100	0.949	0.71	85.5	NA
MS2/MCP	bcdGFP_st9	2015-07-30	Profiler (radius=10, n=0) : bcdGFP-st9_0009.tab.txt	1	3	47	NA	106	0.844	72	0.88	1.47222	89	NA
MS2/MCP	bcdGFP_st9	2015-07-30	Profiler (radius=10, n=0) : bcdGFP-st9_0009.tab.txt	1	3	75	NA	86	0.917	144	0.924	0.597222	115	NA
MS2/MCP	bcdGFP_st9	2015-07-30	Profiler (radius=10, n=0) : bcdGFP-st9_0009.tab.txt	1	3	81	NA	145	0.933	190	0.898	0.763158	167.5	NA
MS2/MCP	bcdGFP_st9	2015-07-30	Profiler (radius=10, n=0) : bcdGFP-st9_0009.tab.txt	1	3	94	NA	126	0.895	86	0.889	1.46512	106	NA
MS2/MCP	bcdGFP_st9	2015-07-30	Profiler (radius=10, n=0) : bcdGFP-st9_0009.tab.txt	1	3	109	NA	121	0.868	103	0.865	1.17476	112	NA
MS2/MCP	bcdGFP_st9	2015-07-30	Profiler (radius=10, n=0) : bcdGFP-st9_0009.tab.txt	1	3	110	NA	62	0.901	123	0.817	0.504065	92.5	NA
MS2/MCP	bcdGFP_st9	2015-07-30	Profiler (radius=10, n=0) : bcdGFP-st9_0012.tab.txt	2	1	7	2.29	168	0.904	129	0.967	1.30233	148.5	NA
MS2/MCP	bcdGFP_st9	2015-07-30	Profiler (radius=10, n=0) : bcdGFP-st9_0012.tab.txt	2	1	29	5.906	119	0.95	87	0.845	1.36782	103	NA
MS2/MCP	bcdGFP_st9	2015-07-30	Profiler (radius=10, n=0) : bcdGFP-st9_0012.tab.txt	2	1	31	3.786	71	0.872	95	0.891	0.747368	83	NA
MS2/MCP	bcdGFP_st9	2015-07-30	Profiler (radius=10, n=0) : bcdGFP-st9_0012.tab.txt	2	1	32	0.713	129	0.915	109	0.955	1.18349	119	NA
MS2/MCP	bcdGFP_st9	2015-07-30	Profiler (radius=10, n=0) : bcdGFP-st9_0012.tab.txt	2	1	38	2.027	94	0.954	80	0.971	1.175	87	NA
MS2/MCP	bcdGFP_st9	2015-07-30	Profiler (radius=10, n=0) : bcdGFP-st9_0012.tab.txt	2	1	40	4.974	87	0.979	117	0.812	0.74359	102	NA
MS2/MCP	bcdGFP_st9	2015-07-30	Profiler (radius=10, n=0) : bcdGFP-st9_0012.tab.txt	2	1	41	1.204	86	0.938	62	0.941	1.3871	74	NA
MS2/MCP	bcdGFP_st9	2015-07-30	Profiler (radius=10, n=0) : bcdGFP-st9_0012.tab.txt	2	1	48	3.553	83	0.929	122	0.939	0.680328	102.5	NA
MS2/MCP	bcdGFP_st9	2015-07-30	Profiler (radius=10, n=0) : bcdGFP-st9_0012.tab.txt	2	1	49	1.076	99	0.853	117	0.913	0.846154	108	NA
MS2/MCP	bcdGFP_st9	2015-07-30	Profiler (radius=10, n=0) : bcdGFP-st9_0012.tab.txt	2	1	60	2.358	96	0.962	97	0.86	0.989691	96.5	NA
MS2/MCP	bcdGFP_st9	2015-07-30	Profiler (radius=10, n=0) : bcdGFP-st9_0012.tab.txt	2	1	61	5.058	121	0.961	101	0.948	1.19802	111	NA
MS2/MCP	bcdGFP_st9	2015-07-30	Profiler (radius=10, n=0) : bcdGFP-st9_0012.tab.txt	2	1	66	2.555	121	0.943	106	0.918	1.14151	113.5	NA
MS2/MCP	bcdGFP_st9	2015-07-30	Profiler (radius=10, n=0) : bcdGFP-st9_0012.tab.txt	2	1	68	1.249	106	0.972	78	0.811	1.35897	92	NA
MS2/MCP	bcdGFP_st9	2015-07-30	Profiler (radius=10, n=0) : bcdGFP-st9_0012.tab.txt	2	1	69	2.541	70	0.928	101	0.918	0.693069	85.5	NA
MS2/MCP	bcdGFP_st9	2015-07-30	Profiler (radius=10, n=0) : bcdGFP-st9_0012.tab.txt	2	1	76	4.314	148	0.975	144	0.927	1.02778	146	NA
MS2/MCP	bcdGFP_st9	2015-07-30	Profiler (radius=10, n=0) : bcdGFP-st9_0012.tab.txt	2	1	77	5.548	71	0.95	86	0.931	0.825581	78.5	NA
MS2/MCP	bcdGFP_st9	2015-07-30	Profiler (radius=10, n=0) : bcdGFP-st9_0012.tab.txt	2	1	79	1.894	76	0.947	92	0.984	0.826087	84	NA
MS2/MCP	bcdGFP_st9	2015-07-30	Profiler (radius=10, n=0) : bcdGFP-st9_0012.tab.txt	2	1	81	6.511	137	0.946	75	0.959	1.82667	106	NA
MS2/MCP	bcdGFP_st9	2015-07-30	Profiler (radius=10, n=0) : bcdGFP-st9_0012.tab.txt	2	1	82	4.125	111	0.946	78	0.864	1.42308	94.5	NA
MS2/MCP	bcdGFP_st9	2015-07-30	Profiler (radius=10, n=0) : bcdGFP-st9_0012.tab.txt	2	1	86	4.94	71	0.966	118	0.993	0.601695	94.5	NA
MS2/MCP	bcdGFP_st9	2015-07-30	Profiler (radius=10, n=0) : bcdGFP-st9_0012.tab.txt	2	1	87	1.038	136	0.935	150	0.871	0.906667	143	NA
MS2/MCP	bcdGFP_st9	2015-07-30	Profiler (radius=10, n=0) : bcdGFP-st9_0012.tab.txt	2	1	90	5.577	148	0.952	128	0.895	1.15625	138	NA
MS2/MCP	bcdGFP_st9	2015-07-30	Profiler (radius=10, n=0) : bcdGFP-st9_0012.tab.txt	2	1	97	2.661	109	0.986	81	0.947	1.34568	95	NA
MS2/MCP	bcdGFP_st9	2015-07-30	Profiler (radius=10, n=0) : bcdGFP-st9_0012.tab.txt	2	1	103	3.798	96	0.959	63	0.937	1.52381	79.5	NA
MS2/MCP	bcdGFP_st9	2015-07-30	Profiler (radius=10, n=0) : bcdGFP-st9_0012.tab.txt	2	1	108	2.638	122	0.924	67	0.912	1.8209	94.5	NA
MS2/MCP	bcdGFP_st9	2015-07-30	Profiler (radius=10, n=0) : bcdGFP-st9_0012.tab.txt	2	1	110	7.191	115	0.9	81	0.973	1.41975	98	NA
MS2/MCP	bcdGFP_st9	2015-07-30	Profiler (radius=10, n=0) : bcdGFP-st9_0012.tab.txt	2	1	113	5.693	81	0.888	91	0.842	0.89011	86	NA
MS2/MCP	bcdGFP_st9	2015-07-30	Profiler (radius=10, n=0) : bcdGFP-st9_0012.tab.txt	2	1	119	3.964	76	0.829	46	0.867	1.65217	61	NA
MS2/MCP	bcdGFP_st9	2015-07-30	Profiler (radius=10, n=0) : bcdGFP-st9_0012.tab.txt	2	1	120	1.607	101	0.98	123	0.926	0.821138	112	NA
MS2/MCP	bcdGFP_st9	2015-07-30	Profiler (radius=10, n=0) : bcdGFP-st9_0012.tab.txt	2	1	129	4.617	67	0.936	80	0.909	0.8375	73.5	NA
MS2/MCP	bcdGFP_st9	2015-07-30	Profiler (radius=10, n=0) : bcdGFP-st9_0012.tab.txt	2	1	131	3.04	94	0.941	108	0.897	0.87037	101	NA
MS2/MCP	bcdGFP_st9	2015-07-30	Profiler (radius=10, n=0) : bcdGFP-st9_0012.tab.txt	2	1	140	3.384	82	0.959	68	0.914	1.20588	75	NA
MS2/MCP	bcdGFP_st9	2015-07-30	Profiler (radius=10, n=0) : bcdGFP-st9_0012.tab.txt	2	1	145	0.969	102	0.902	145	0.839	0.703448	123.5	NA
MS2/MCP	bcdGFP_st9	2015-07-30	Profiler (radius=10, n=0) : bcdGFP-st9_0012.tab.txt	2	1	148	1.56	91	0.896	86	0.8	1.05814	88.5	NA
MS2/MCP	bcdGFP_st9	2015-07-30	Profiler (radius=10, n=0) : bcdGFP-st9_0012.tab.txt	2	1	149	4.035	77	0.963	122	0.85	0.631148	99.5	NA
MS2/MCP	bcdGFP_st9	2015-07-30	Profiler (radius=10, n=0) : bcdGFP-st9_0012.tab.txt	2	1	150	7.615	68	0.815	92	0.969	0.73913	80	NA
MS2/MCP	bcdGFP_st9	2015-07-30	Profiler (radius=10, n=0) : bcdGFP-st9_0012.tab.txt	2	1	163	1.474	59	0.939	80	0.826	0.7375	69.5	NA
MS2/MCP	bcdGFP_st9	2015-07-30	Profiler (radius=10, n=0) : bcdGFP-st9_0012.tab.txt	2	1	164	8.128	90	0.919	105	0.865	0.857143	97.5	NA
MS2/MCP	bcdGFP_st9	2015-07-30	Profiler (radius=10, n=0) : bcdGFP-st9_0012.tab.txt	2	1	183	3.188	152	0.97	111	0.908	1.36937	131.5	NA
MS2/MCP	bcdGFP_st9	2015-07-30	Profiler (radius=10, n=0) : bcdGFP-st9_0012.tab.txt	2	1	185	8.164	58	0.95	79	0.942	0.734177	68.5	NA
MS2/MCP	bcdGFP_st9	2015-07-30	Profiler (radius=10, n=0) : bcdGFP-st9_0012.tab.txt	2	1	187	3.787	48	0.876	82	0.893	0.585366	65	NA
MS2/MCP	bcdGFP_st9	2015-07-30	Profiler (radius=10, n=0) : bcdGFP-st9_0012.tab.txt	2	1	188	6.978	117	0.919	161	0.974	0.726708	139	NA
MS2/MCP	bcdGFP_st9	2015-07-30	Profiler (radius=10, n=0) : bcdGFP-st9_0016.tab.txt	2	2	0	7.462	127	0.924	160	0.968	0.79375	143.5	NA
MS2/MCP	bcdGFP_st9	2015-07-30	Profiler (radius=10, n=0) : bcdGFP-st9_0016.tab.txt	2	2	17	14.106	110	0.964	104	0.838	1.05769	107	NA
MS2/MCP	bcdGFP_st9	2015-07-30	Profiler (radius=10, n=0) : bcdGFP-st9_0016.tab.txt	2	2	36	14.342	106	0.886	124	0.979	0.854839	115	NA
MS2/MCP	bcdGFP_st9	2015-07-30	Profiler (radius=10, n=0) : bcdGFP-st9_0016.tab.txt	2	2	49	11.362	116	0.857	87	0.818	1.33333	101.5	NA
MS2/MCP	bcdGFP_st9	2015-07-30	Profiler (radius=10, n=0) : bcdGFP-st9_0016.tab.txt	2	2	51	15.12	102	0.915	112	0.889	0.910714	107	NA
MS2/MCP	bcdGFP_st9	2015-07-30	Profiler (radius=10, n=0) : bcdGFP-st9_0016.tab.txt	2	2	52	0.772	95	0.868	102	0.952	0.931373	98.5	NA
MS2/MCP	bcdGFP_st9	2015-07-30	Profiler (radius=10, n=0) : bcdGFP-st9_0016.tab.txt	2	2	53	11.208	100	0.92	103	0.991	0.970874	101.5	NA
MS2/MCP	bcdGFP_st9	2015-07-30	Profiler (radius=10, n=0) : bcdGFP-st9_0016.tab.txt	2	2	54	13.593	127	0.897	126	0.975	1.00794	126.5	NA
MS2/MCP	bcdGFP_st9	2015-07-30	Profiler (radius=10, n=0) : bcdGFP-st9_0016.tab.txt	2	2	55	1.79	61	0.949	107	0.918	0.570093	84	NA
MS2/MCP	bcdGFP_st9	2015-07-30	Profiler (radius=10, n=0) : bcdGFP-st9_0016.tab.txt	2	2	56	7.502	82	0.922	92	0.985	0.891304	87	NA
MS2/MCP	bcdGFP_st9	2015-07-30	Profiler (radius=10, n=0) : bcdGFP-st9_0016.tab.txt	2	2	61	7.973	76	0.958	104	0.892	0.730769	90	NA
MS2/MCP	bcdGFP_st9	2015-07-30	Profiler (radius=10, n=0) : bcdGFP-st9_0016.tab.txt	2	2	64	15.823	132	0.95	105	0.963	1.25714	118.5	NA
MS2/MCP	bcdGFP_st9	2015-07-30	Profiler (radius=10, n=0) : bcdGFP-st9_0016.tab.txt	2	2	65	4.528	81	0.897	106	0.824	0.764151	93.5	NA
MS2/MCP	bcdGFP_st9	2015-07-30	Profiler (radius=10, n=0) : bcdGFP-st9_0016.tab.txt	2	2	66	10.065	113	0.86	61	0.811	1.85246	87	NA
MS2/MCP	bcdGFP_st9	2015-07-30	Profiler (radius=10, n=0) : bcdGFP-st9_0016.tab.txt	2	2	68	0.428	99	0.935	78	0.939	1.26923	88.5	NA
MS2/MCP	bcdGFP_st9	2015-07-30	Profiler (radius=10, n=0) : bcdGFP-st9_0016.tab.txt	2	2	91	8.157	62	0.931	55	0.963	1.12727	58.5	NA
MS2/MCP	bcdGFP_st9	2015-07-30	Profiler (radius=10, n=0) : bcdGFP-st9_0016.tab.txt	2	2	97	8.262	56	0.912	68	0.856	0.823529	62	NA
MS2/MCP	bcdGFP_st9	2015-07-30	Profiler (radius=10, n=0) : bcdGFP-st9_0016.tab.txt	2	2	100	13.437	86	0.932	91	0.862	0.945055	88.5	NA
MS2/MCP	bcdGFP_st9	2015-07-30	Profiler (radius=10, n=0) : bcdGFP-st9_0016.tab.txt	2	2	106	9.278	113	0.975	137	0.934	0.824818	125	NA
MS2/MCP	bcdGFP_st9	2015-07-30	Profiler (radius=10, n=0) : bcdGFP-st9_0016.tab.txt	2	2	107	10.69	120	0.809	114	0.923	1.05263	117	NA
MS2/MCP	bcdGFP_st9	2015-07-30	Profiler (radius=10, n=0) : bcdGFP-st9_0016.tab.txt	2	2	111	12.253	100	0.928	59	0.899	1.69492	79.5	NA
MS2/MCP	bcdGFP_st9	2015-07-30	Profiler (radius=10, n=0) : bcdGFP-st9_0016.tab.txt	2	2	116	8.549	153	0.937	144	0.951	1.0625	148.5	NA
MS2/MCP	bcdGFP_st9	2015-07-30	Profiler (radius=10, n=0) : bcdGFP-st9_0016.tab.txt	2	2	120	6.919	92	0.974	74	0.944	1.24324	83	NA
MS2/MCP	bcdGFP_st9	2015-07-30	Profiler (radius=10, n=0) : bcdGFP-st9_0016.tab.txt	2	2	131	9.682	57	0.978	79	0.965	0.721519	68	NA
MS2/MCP	bcdGFP_st9	2015-07-30	Profiler (radius=10, n=0) : bcdGFP-st9_0016.tab.txt	2	2	136	0.375	72	0.957	64	0.93	1.125	68	NA
MS2/MCP	bcdGFP_st9	2015-07-30	Profiler (radius=10, n=0) : bcdGFP-st9_0016.tab.txt	2	2	138	7.874	116	0.942	124	0.929	0.935484	120	NA
MS2/MCP	bcdGFP_st9	2015-07-30	Profiler (radius=10, n=0) : bcdGFP-st9_0016.tab.txt	2	2	140	7.589	65	0.964	100	0.969	0.65	82.5	NA
MS2/MCP	bcdGFP_st9	2015-07-30	Profiler (radius=10, n=0) : bcdGFP-st9_0016.tab.txt	2	2	141	12.272	206	0.951	137	0.921	1.50365	171.5	NA
MS2/MCP	bcdGFP_st9	2015-07-30	Profiler (radius=10, n=0) : bcdGFP-st9_0016.tab.txt	2	2	143	9.016	77	0.807	118	0.836	0.652542	97.5	NA
MS2/MCP	bcdGFP_st9	2015-07-30	Profiler (radius=10, n=0) : bcdGFP-st9_0016.tab.txt	2	2	162	11.255	45	0.874	58	0.934	0.775862	51.5	NA
MS2/MCP	bcdGFP_st9	2015-07-30	Profiler (radius=10, n=0) : bcdGFP-st9_0016.tab.txt	2	2	165	6.094	85	0.912	135	0.899	0.62963	110	NA
MS2/MCP	bcdGFP_st9	2015-07-30	Profiler (radius=10, n=0) : bcdGFP-st9_0016.tab.txt	2	2	176	5.498	112	0.923	97	0.966	1.15464	104.5	NA
MS2/MCP	bcdGFP_st9	2015-07-30	Profiler (radius=10, n=0) : bcdGFP-st9_0016.tab.txt	2	2	177	11.438	128	0.908	91	0.855	1.40659	109.5	NA
MS2/MCP	bcdGFP_st9	2015-07-30	Profiler (radius=10, n=0) : bcdGFP-st9_0016.tab.txt	2	2	180	8.601	96	0.978	73	0.907	1.31507	84.5	NA
MS2/MCP	bcdGFP_st9	2015-07-30	Profiler (radius=10, n=0) : bcdGFP-st9_0016.tab.txt	2	2	203	4.675	56	0.932	68	0.911	0.823529	62	NA
MS2/MCP	bcdGFP_st9	2015-07-30	Profiler (radius=10, n=0) : bcdGFP-st9_0016.tab.txt	2	2	204	5.325	79	0.822	77	0.886	1.02597	78	NA
MS2/MCP	bcdGFP_st9	2015-07-30	Profiler (radius=10, n=0) : bcdGFP-st9_0016.tab.txt	2	2	209	9.984	75	0.884	96	0.808	0.78125	85.5	NA
MS2/MCP	bcdGFP_st9	2015-07-30	Profiler (radius=10, n=0) : bcdGFP-st9_0016.tab.txt	2	2	212	3.093	59	0.801	51	0.924	1.15686	55	NA
MS2/MCP	bcdGFP_st9	2015-07-30	Profiler (radius=10, n=0) : bcdGFP-st9_0016.tab.txt	2	2	216	12.863	71	0.938	89	0.907	0.797753	80	NA
MS2/MCP	bcdGFP_st9	2015-07-30	Profiler (radius=10, n=0) : bcdGFP-st9_0016.tab.txt	2	2	217	10.785	111	0.864	82	0.95	1.35366	96.5	NA
MS2/MCP	bcdGFP_st9	2015-07-30	Profiler (radius=10, n=0) : bcdGFP-st9_0016.tab.txt	2	2	219	10.648	130	0.895	96	0.951	1.35417	113	NA
MS2/MCP	bcdGFP_st9	2015-07-30	Profiler (radius=10, n=0) : bcdGFP-st9_0016.tab.txt	2	2	222	1.403	55	0.922	78	0.918	0.705128	66.5	NA
MS2/MCP	bcdGFP_st9	2015-07-30	Profiler (radius=10, n=0) : bcdGFP-st9_0016.tab.txt	2	2	228	4.896	115	0.94	64	0.9	1.79688	89.5	NA
MS2/MCP	bcdGFP_st9	2015-07-30	Profiler (radius=10, n=0) : bcdGFP-st9_0016.tab.txt	2	2	229	10.461	57	0.847	54	0.867	1.05556	55.5	NA
MS2/MCP	bcdGFP_st9	2015-07-30	Profiler (radius=10, n=0) : bcdGFP-st9_0016.tab.txt	2	2	230	11.571	63	0.838	61	0.922	1.03279	62	NA
MS2/MCP	bcdGFP_st9	2015-07-30	Profiler (radius=10, n=0) : bcdGFP-st9_0016.tab.txt	2	2	245	13.04	73	0.89	78	0.916	0.935897	75.5	NA
MS2/MCP	bcdGFP_st9	2015-07-30	Profiler (radius=10, n=0) : bcdGFP-st9_0016.tab.txt	2	2	248	6.562	94	0.805	64	0.912	1.46875	79	NA
MS2/MCP	bcdGFP_st9	2015-07-30	Profiler (radius=10, n=0) : bcdGFP-st9_0016.tab.txt	2	2	251	10.056	92	0.926	102	0.936	0.901961	97	NA
MS2/MCP	bcdGFP_st9	2015-07-30	Profiler (radius=10, n=0) : bcdGFP-st9_0016.tab.txt	2	2	256	9.022	124	0.883	70	0.804	1.77143	97	NA
MS2/MCP	bcdGFP_st9	2015-07-30	Profiler (radius=10, n=0) : bcdGFP-st9_0016.tab.txt	2	2	262	9.7	86	0.935	106	0.896	0.811321	96	NA
MS2/MCP	bcdGFP_st9	2015-07-30	Profiler (radius=10, n=0) : bcdGFP-st9_0016.tab.txt	2	2	265	5.346	118	0.952	81	0.801	1.45679	99.5	NA
MS2/MCP	bcdGFP_st9	2015-07-30	Profiler (radius=10, n=0) : bcdGFP-st9_0016.tab.txt	2	2	271	11.327	176	0.942	91	0.927	1.93407	133.5	NA
MS2/MCP	bcdGFP_st9	2015-07-30	Profiler (radius=10, n=0) : bcdGFP-st9_0016.tab.txt	2	2	281	9.446	58	0.854	87	0.813	0.666667	72.5	NA
MS2/MCP	bcdGFP_st9	2015-07-30	Profiler (radius=10, n=0) : bcdGFP-st9_0016.tab.txt	2	2	302	9.289	67	0.887	51	0.847	1.31373	59	NA
MS2/MCP	bcdGFP_st9	2015-07-30	Profiler (radius=10, n=1) : bcdGFP-st9_0003.tab.txt	1	1	5	NA	71	0.845	125	0.977	0.568	98	NA
MS2/MCP	bcdGFP_st9	2015-07-30	Profiler (radius=10, n=1) : bcdGFP-st9_0003.tab.txt	1	1	6	NA	90	0.983	73	0.905	1.23288	81.5	NA
MS2/MCP	bcdGFP_st9	2015-07-30	Profiler (radius=10, n=1) : bcdGFP-st9_0003.tab.txt	1	1	19	NA	94	0.951	107	0.895	0.878505	100.5	NA
MS2/MCP	bcdGFP_st9	2015-07-30	Profiler (radius=10, n=1) : bcdGFP-st9_0003.tab.txt	1	1	78	NA	97	0.95	98	0.806	0.989796	97.5	NA
MS2/MCP	bcdGFP_st9	2015-07-30	Profiler (radius=10, n=1) : bcdGFP-st9_0003.tab.txt	1	1	105	NA	210	0.942	200	0.9	1.05	205	NA
MS2/MCP	bcdGFP_st9	2015-07-30	Profiler (radius=10, n=1) : bcdGFP-st9_0003.tab.txt	1	1	131	NA	175	0.92	141	0.818	1.24113	158	NA
MS2/MCP	bcdGFP_st9	2015-08-06	Profiler (radius=10, n=0) : bcdGFP_st9_0000.tab.txt	1	1	2	4.37	95	0.937	131	0.979	0.725191	113	NA
MS2/MCP	bcdGFP_st9	2015-08-06	Profiler (radius=10, n=0) : bcdGFP_st9_0000.tab.txt	1	1	3	5.365	121	0.924	152	0.91	0.796053	136.5	NA
MS2/MCP	bcdGFP_st9	2015-08-06	Profiler (radius=10, n=0) : bcdGFP_st9_0000.tab.txt	1	1	6	3.222	120	0.85	186	0.8	0.645161	153	NA
MS2/MCP	bcdGFP_st9	2015-08-06	Profiler (radius=10, n=0) : bcdGFP_st9_0000.tab.txt	1	1	7	12.647	158	0.939	81	0.979	1.95062	119.5	NA
MS2/MCP	bcdGFP_st9	2015-08-06	Profiler (radius=10, n=0) : bcdGFP_st9_0000.tab.txt	1	1	14	3.196	105	0.887	145	0.97	0.724138	125	NA
MS2/MCP	bcdGFP_st9	2015-08-06	Profiler (radius=10, n=0) : bcdGFP_st9_0000.tab.txt	1	1	16	7.273	71	0.882	73	0.876	0.972603	72	NA
MS2/MCP	bcdGFP_st9	2015-08-06	Profiler (radius=10, n=0) : bcdGFP_st9_0000.tab.txt	1	1	19	3.876	69	0.91	126	0.938	0.547619	97.5	NA
MS2/MCP	bcdGFP_st9	2015-08-06	Profiler (radius=10, n=0) : bcdGFP_st9_0000.tab.txt	1	1	30	7.503	71	0.966	121	0.965	0.586777	96	NA
MS2/MCP	bcdGFP_st9	2015-08-06	Profiler (radius=10, n=0) : bcdGFP_st9_0000.tab.txt	1	1	33	13.613	157	0.927	90	0.952	1.74444	123.5	NA
MS2/MCP	bcdGFP_st9	2015-08-06	Profiler (radius=10, n=0) : bcdGFP_st9_0000.tab.txt	1	1	36	3.88	111	0.832	69	0.822	1.6087	90	NA
MS2/MCP	bcdGFP_st9	2015-08-06	Profiler (radius=10, n=0) : bcdGFP_st9_0000.tab.txt	1	1	42	2.699	69	0.916	105	0.966	0.657143	87	NA
MS2/MCP	bcdGFP_st9	2015-08-06	Profiler (radius=10, n=0) : bcdGFP_st9_0000.tab.txt	1	1	47	3.911	125	0.972	65	0.937	1.92308	95	NA
MS2/MCP	bcdGFP_st9	2015-08-06	Profiler (radius=10, n=0) : bcdGFP_st9_0000.tab.txt	1	1	52	2.624	82	0.979	82	0.828	1	82	NA
MS2/MCP	bcdGFP_st9	2015-08-06	Profiler (radius=10, n=0) : bcdGFP_st9_0000.tab.txt	1	1	64	9.489	80	0.967	95	0.821	0.842105	87.5	NA
MS2/MCP	bcdGFP_st9	2015-08-06	Profiler (radius=10, n=0) : bcdGFP_st9_0000.tab.txt	1	1	69	2.646	91	0.879	88	0.951	1.03409	89.5	NA
MS2/MCP	bcdGFP_st9	2015-08-06	Profiler (radius=10, n=0) : bcdGFP_st9_0000.tab.txt	1	1	77	2.486	76	0.937	89	0.919	0.853933	82.5	NA
MS2/MCP	bcdGFP_st9	2015-08-06	Profiler (radius=10, n=0) : bcdGFP_st9_0000.tab.txt	1	1	81	12.186	114	0.914	107	0.848	1.06542	110.5	NA
MS2/MCP	bcdGFP_st9	2015-08-06	Profiler (radius=10, n=0) : bcdGFP_st9_0000.tab.txt	1	1	89	6.907	79	0.848	82	0.884	0.963415	80.5	NA
MS2/MCP	bcdGFP_st9	2015-08-06	Profiler (radius=10, n=0) : bcdGFP_st9_0000.tab.txt	1	1	100	4.905	107	0.937	114	0.827	0.938596	110.5	NA
MS2/MCP	bcdGFP_st9	2015-08-06	Profiler (radius=10, n=0) : bcdGFP_st9_0000.tab.txt	1	1	106	3.444	193	0.952	104	0.913	1.85577	148.5	NA
MS2/MCP	bcdGFP_st9	2015-08-06	Profiler (radius=10, n=0) : bcdGFP_st9_0000.tab.txt	1	1	109	2.443	59	0.94	80	0.952	0.7375	69.5	NA
MS2/MCP	bcdGFP_st9	2015-08-06	Profiler (radius=10, n=0) : bcdGFP_st9_0000.tab.txt	1	1	122	4.332	152	0.859	114	0.985	1.33333	133	NA
MS2/MCP	bcdGFP_st9	2015-08-06	Profiler (radius=10, n=0) : bcdGFP_st9_0000.tab.txt	1	1	129	3.557	77	0.801	82	0.935	0.939024	79.5	NA
MS2/MCP	bcdGFP_st9	2015-08-06	Profiler (radius=10, n=0) : bcdGFP_st9_0000.tab.txt	1	1	137	6.239	162	0.939	129	0.871	1.25581	145.5	NA
MS2/MCP	bcdGFP_st9	2015-08-06	Profiler (radius=10, n=0) : bcdGFP_st9_0000.tab.txt	1	1	138	5.807	69	0.9	74	0.958	0.932432	71.5	NA
MS2/MCP	bcdGFP_st9	2015-08-06	Profiler (radius=10, n=0) : bcdGFP_st9_0000.tab.txt	1	1	139	10.089	88	0.8	49	0.871	1.79592	68.5	NA
MS2/MCP	bcdGFP_st9	2015-08-06	Profiler (radius=10, n=0) : bcdGFP_st9_0000.tab.txt	1	1	142	5.556	53	0.894	48	0.814	1.10417	50.5	NA
MS2/MCP	bcdGFP_st9	2015-08-06	Profiler (radius=10, n=0) : bcdGFP_st9_0000.tab.txt	1	1	152	4.387	151	0.925	102	0.843	1.48039	126.5	NA
MS2/MCP	bcdGFP_st9	2015-08-06	Profiler (radius=10, n=0) : bcdGFP_st9_0000.tab.txt	1	1	155	0.111	88	0.862	87	0.973	1.01149	87.5	NA
MS2/MCP	bcdGFP_st9	2015-08-06	Profiler (radius=10, n=0) : bcdGFP_st9_0000.tab.txt	1	1	161	2.147	74	0.931	68	0.912	1.08824	71	NA
MS2/MCP	bcdGFP_st9	2015-08-06	Profiler (radius=10, n=0) : bcdGFP_st9_0000.tab.txt	1	1	162	8.551	62	0.9	85	0.967	0.729412	73.5	NA
MS2/MCP	bcdGFP_st9	2015-08-06	Profiler (radius=10, n=0) : bcdGFP_st9_0000.tab.txt	1	1	165	5.343	121	0.868	66	0.853	1.83333	93.5	NA
MS2/MCP	bcdGFP_st9	2015-08-06	Profiler (radius=10, n=0) : bcdGFP_st9_0000.tab.txt	1	1	169	13.377	90	0.823	101	0.82	0.891089	95.5	NA
MS2/MCP	bcdGFP_st9	2015-08-06	Profiler (radius=10, n=0) : bcdGFP_st9_0000.tab.txt	1	1	173	7.276	72	0.92	74	0.894	0.972973	73	NA
MS2/MCP	bcdGFP_st9	2015-08-06	Profiler (radius=10, n=0) : bcdGFP_st9_0000.tab.txt	1	1	175	0.769	60	0.915	73	0.825	0.821918	66.5	NA
MS2/MCP	bcdGFP_st9	2015-08-06	Profiler (radius=10, n=0) : bcdGFP_st9_0000.tab.txt	1	1	176	2.529	96	0.97	78	0.884	1.23077	87	NA
MS2/MCP	bcdGFP_st9	2015-08-06	Profiler (radius=10, n=0) : bcdGFP_st9_0000.tab.txt	1	1	180	8.677	91	0.904	84	0.895	1.08333	87.5	NA
MS2/MCP	bcdGFP_st9	2015-08-06	Profiler (radius=10, n=0) : bcdGFP_st9_0000.tab.txt	1	1	183	12.547	81	0.898	47	0.865	1.7234	64	NA
MS2/MCP	bcdGFP_st9	2015-08-06	Profiler (radius=10, n=0) : bcdGFP_st9_0005.tab.txt	2	2	8	1.739	152	0.977	147	0.98	1.03401	149.5	NA
MS2/MCP	bcdGFP_st9	2015-08-06	Profiler (radius=10, n=0) : bcdGFP_st9_0005.tab.txt	2	2	13	3.266	71	0.977	129	0.992	0.550388	100	NA
MS2/MCP	bcdGFP_st9	2015-08-06	Profiler (radius=10, n=0) : bcdGFP_st9_0005.tab.txt	2	2	19	2.73	56	0.983	76	0.956	0.736842	66	NA
MS2/MCP	bcdGFP_st9	2015-08-06	Profiler (radius=10, n=0) : bcdGFP_st9_0005.tab.txt	2	2	20	2.91	76	0.948	86	0.897	0.883721	81	NA
MS2/MCP	bcdGFP_st9	2015-08-06	Profiler (radius=10, n=0) : bcdGFP_st9_0005.tab.txt	2	2	23	1.063	102	0.973	106	0.908	0.962264	104	NA
MS2/MCP	bcdGFP_st9	2015-08-06	Profiler (radius=10, n=0) : bcdGFP_st9_0005.tab.txt	2	2	26	2.002	86	0.884	144	0.974	0.597222	115	NA
MS2/MCP	bcdGFP_st9	2015-08-06	Profiler (radius=10, n=0) : bcdGFP_st9_0005.tab.txt	2	2	28	0.921	83	0.938	107	0.945	0.775701	95	NA
MS2/MCP	bcdGFP_st9	2015-08-06	Profiler (radius=10, n=0) : bcdGFP_st9_0005.tab.txt	2	2	31	0.489	87	0.969	98	0.973	0.887755	92.5	NA
MS2/MCP	bcdGFP_st9	2015-08-06	Profiler (radius=10, n=0) : bcdGFP_st9_0005.tab.txt	2	2	32	1.344	98	0.983	99	0.917	0.989899	98.5	NA
MS2/MCP	bcdGFP_st9	2015-08-06	Profiler (radius=10, n=0) : bcdGFP_st9_0005.tab.txt	2	2	36	1.045	64	0.896	94	0.986	0.680851	79	NA
MS2/MCP	bcdGFP_st9	2015-08-06	Profiler (radius=10, n=0) : bcdGFP_st9_0005.tab.txt	2	2	37	4.113	99	0.972	99	0.891	1	99	NA
MS2/MCP	bcdGFP_st9	2015-08-06	Profiler (radius=10, n=0) : bcdGFP_st9_0005.tab.txt	2	2	46	1.833	125	0.84	88	0.932	1.42045	106.5	NA
MS2/MCP	bcdGFP_st9	2015-08-06	Profiler (radius=10, n=0) : bcdGFP_st9_0005.tab.txt	2	2	53	2.585	155	0.872	104	0.9	1.49038	129.5	NA
MS2/MCP	bcdGFP_st9	2015-08-06	Profiler (radius=10, n=0) : bcdGFP_st9_0005.tab.txt	2	2	73	1.373	62	0.877	64	0.887	0.96875	63	NA
MS2/MCP	bcdGFP_st9	2015-08-06	Profiler (radius=10, n=0) : bcdGFP_st9_0005.tab.txt	2	2	80	2.175	79	0.861	89	0.926	0.88764	84	NA
MS2/MCP	bcdGFP_st9	2015-08-06	Profiler (radius=10, n=0) : bcdGFP_st9_0005.tab.txt	2	2	84	0.81	82	0.842	59	0.807	1.38983	70.5	NA
MS2/MCP	bcdGFP_st9	2015-08-06	Profiler (radius=10, n=0) : bcdGFP_st9_0005.tab.txt	2	2	95	10.065	80	0.877	145	0.945	0.551724	112.5	NA
MS2/MCP	bcdGFP_st9	2015-08-06	Profiler (radius=10, n=0) : bcdGFP_st9_0005.tab.txt	2	2	98	6.156	139	0.937	153	0.948	0.908497	146	NA
MS2/MCP	bcdGFP_st9	2015-08-06	Profiler (radius=10, n=0) : bcdGFP_st9_0005.tab.txt	2	2	102	2.001	106	0.9	84	0.807	1.2619	95	NA
MS2/MCP	bcdGFP_st9	2015-08-06	Profiler (radius=10, n=0) : bcdGFP_st9_0005.tab.txt	2	2	108	2.568	128	0.845	103	0.862	1.24272	115.5	NA
MS2/MCP	bcdGFP_st9	2015-08-06	Profiler (radius=10, n=0) : bcdGFP_st9_0005.tab.txt	2	2	113	2.312	74	0.887	111	0.829	0.666667	92.5	NA
MS2/MCP	bcdGFP_st9	2015-08-06	Profiler (radius=10, n=0) : bcdGFP_st9_0005.tab.txt	2	2	114	1.51	44	0.93	46	0.849	0.956522	45	NA
MS2/MCP	bcdGFP_st9	2015-08-06	Profiler (radius=10, n=0) : bcdGFP_st9_0005.tab.txt	2	2	115	6.254	88	0.87	78	0.936	1.12821	83	NA
MS2/MCP	bcdGFP_st9	2015-08-06	Profiler (radius=10, n=0) : bcdGFP_st9_0005.tab.txt	2	2	116	4.088	89	0.98	66	0.939	1.34848	77.5	NA
MS2/MCP	bcdGFP_st9	2015-08-06	Profiler (radius=10, n=0) : bcdGFP_st9_0005.tab.txt	2	2	120	4.85	62	0.864	88	0.863	0.704545	75	NA
MS2/MCP	grkGFP_st8-9	2015-08-06	Profiler (radius=10, n=0) : grkGFP_st8-9_0000.tab.txt	1	1	4	2.466	131	0.808	172	0.868	0.761628	151.5	NA
MS2/MCP	grkGFP_st8-9	2015-08-06	Profiler (radius=10, n=0) : grkGFP_st8-9_0000.tab.txt	1	1	12	2.318	204	0.915	126	0.808	1.61905	165	NA
MS2/MCP	grkGFP_st8-9	2015-08-06	Profiler (radius=10, n=0) : grkGFP_st8-9_0000.tab.txt	1	1	17	1.46	131	0.935	104	0.8	1.25962	117.5	NA
MS2/MCP	grkGFP_st8-9	2015-08-06	Profiler (radius=10, n=0) : grkGFP_st8-9_0000.tab.txt	1	1	33	0.888	107	0.917	121	0.92	0.884298	114	NA
MS2/MCP	grkGFP_st8-9	2015-08-06	Profiler (radius=10, n=0) : grkGFP_st8-9_0000.tab.txt	1	1	61	2.295	79	0.931	143	0.966	0.552448	111	NA
MS2/MCP	grkGFP_st8-9	2015-08-06	Profiler (radius=10, n=0) : grkGFP_st8-9_0000.tab.txt	1	1	70	3.149	103	0.823	96	0.941	1.07292	99.5	NA
MS2/MCP	grkGFP_st8-9	2015-08-06	Profiler (radius=10, n=0) : grkGFP_st8-9_0000.tab.txt	1	1	80	0.415	55	0.817	66	0.914	0.833333	60.5	NA
MS2/MCP	grkGFP_st8-9	2015-08-06	Profiler (radius=10, n=0) : grkGFP_st8-9_0000.tab.txt	1	1	107	2.842	89	0.879	100	0.963	0.89	94.5	NA
MS2/MCP	grkGFP_st8-9	2015-08-06	Profiler (radius=10, n=0) : grkGFP_st8-9_0000.tab.txt	1	1	132	1.691	69	0.894	77	0.832	0.896104	73	NA
MS2/MCP	grkGFP_st8-9	2015-08-06	Profiler (radius=10, n=0) : grkGFP_st8-9_0000.tab.txt	1	1	134	1.404	117	0.825	122	0.964	0.959016	119.5	NA
MS2/MCP	grkGFP_st8-9	2015-08-06	Profiler (radius=10, n=0) : grkGFP_st8-9_0000.tab.txt	1	1	182	1.333	53	0.86	103	0.921	0.514563	78	NA
MS2/MCP	grkGFP_st8-9	2015-08-06	Profiler (radius=10, n=0) : grkGFP_st8-9_0000.tab.txt	1	1	203	0.534	59	0.918	79	0.852	0.746835	69	NA
MS2/MCP	grkGFP_st8-9	2015-08-06	Profiler (radius=10, n=0) : grkGFP_st8-9_0000.tab.txt	1	1	224	10.741	67	0.849	62	0.878	1.08065	64.5	NA
MS2/MCP	grkGFP_st8-9	2015-08-06	Profiler (radius=10, n=0) : grkGFP_st8-9_0000.tab.txt	1	1	280	10.776	72	0.918	68	0.885	1.05882	70	NA
MS2/MCP	grkGFP_st8-9	2015-08-06	Profiler (radius=10, n=0) : grkGFP_st8-9_0003.tab.txt	1	2	29	7.449	83	0.978	90	0.883	0.922222	86.5	NA
MS2/MCP	grkGFP_st8-9	2015-08-06	Profiler (radius=10, n=0) : grkGFP_st8-9_0003.tab.txt	1	2	62	7.509	88	0.912	78	0.833	1.12821	83	NA
MS2/MCP	grkGFP_st8-9	2015-08-06	Profiler (radius=10, n=0) : grkGFP_st8-9_0003.tab.txt	1	2	66	0.952	103	0.963	96	0.988	1.07292	99.5	NA
MS2/MCP	grkGFP_st8-9	2015-08-06	Profiler (radius=10, n=0) : grkGFP_st8-9_0003.tab.txt	1	2	114	8.56	113	0.812	74	0.889	1.52703	93.5	NA
MS2/MCP	grkGFP_st8-9	2015-08-06	Profiler (radius=10, n=0) : grkGFP_st8-9_0003.tab.txt	1	2	117	1.237	109	0.905	107	0.869	1.01869	108	NA
MS2/MCP	grkGFP_st8-9	2015-08-06	Profiler (radius=10, n=0) : grkGFP_st8-9_0003.tab.txt	1	2	131	1.707	81	0.951	58	0.931	1.39655	69.5	NA
MS2/MCP	grkGFP_st8-9	2015-08-06	Profiler (radius=10, n=0) : grkGFP_st8-9_0003.tab.txt	1	2	144	1.716	92	0.837	82	0.812	1.12195	87	NA
MS2/MCP	grkGFP_st8-9	2015-08-06	Profiler (radius=10, n=0) : grkGFP_st8-9_0003.tab.txt	1	2	154	7.993	75	0.877	137	0.953	0.547445	106	NA
MS2/MCP	grkGFP_st8-9	2015-08-06	Profiler (radius=10, n=0) : grkGFP_st8-9_0006.tab.txt	1	3	13	1.772	73	0.948	118	0.925	0.618644	95.5	NA
MS2/MCP	grkGFP_st8-9	2015-08-06	Profiler (radius=10, n=0) : grkGFP_st8-9_0006.tab.txt	1	3	29	1.766	85	0.805	84	0.844	1.0119	84.5	NA
MS2/MCP	grkGFP_st8-9	2015-08-06	Profiler (radius=10, n=0) : grkGFP_st8-9_0006.tab.txt	1	3	55	2.473	129	0.942	144	0.927	0.895833	136.5	NA
MS2/MCP	grkGFP_st8-9	2015-08-06	Profiler (radius=10, n=0) : grkGFP_st8-9_0006.tab.txt	1	3	81	1.931	88	0.825	94	0.966	0.93617	91	NA
MS2/MCP	grkGFP_st8-9	2015-08-06	Profiler (radius=10, n=0) : grkGFP_st8-9_0006.tab.txt	1	3	90	3.696	67	0.918	73	0.843	0.917808	70	NA
MS2/MCP	grkGFP_st8-9	2015-08-06	Profiler (radius=10, n=0) : grkGFP_st8-9_0006.tab.txt	1	3	91	2.122	83	0.947	62	0.949	1.33871	72.5	NA
MS2/MCP	grkGFP_st8-9	2015-08-06	Profiler (radius=10, n=0) : grkGFP_st8-9_0006.tab.txt	1	3	100	4.161	70	0.814	99	0.955	0.707071	84.5	NA
MS2/MCP	grkGFP_st8-9	2015-08-06	Profiler (radius=10, n=0) : grkGFP_st8-9_0006.tab.txt	1	3	105	1.614	103	0.878	98	0.885	1.05102	100.5	NA
MS2/MCP	grkGFP_st8-9	2015-08-06	Profiler (radius=10, n=0) : grkGFP_st8-9_0006.tab.txt	1	3	131	6.353	125	0.883	101	0.937	1.23762	113	NA
MS2/MCP	grkGFP_st8-9	2015-08-06	Profiler (radius=10, n=0) : grkGFP_st8-9_0006.tab.txt	1	3	133	2.771	82	0.844	141	0.922	0.58156	111.5	NA
MS2/MCP	grkGFP_st8-9	2015-08-06	Profiler (radius=10, n=0) : grkGFP_st8-9_0006.tab.txt	1	3	144	2.747	110	0.849	92	0.951	1.19565	101	NA
MS2/MCP	grkGFP_st8-9	2015-08-06	Profiler (radius=10, n=0) : grkGFP_st8-9_0006.tab.txt	1	3	158	1.731	90	0.804	100	0.978	0.9	95	NA
MS2/MCP	grkGFP_st8-9	2015-08-06	Profiler (radius=10, n=0) : grkGFP_st8-9_0006.tab.txt	1	3	177	1.406	104	0.941	153	0.901	0.679739	128.5	NA
MS2/MCP	grkGFP_st8-9	2015-08-06	Profiler (radius=10, n=0) : grkGFP_st8-9_0006.tab.txt	1	3	179	5.712	126	0.894	71	0.901	1.77465	98.5	NA
MS2/MCP	grkGFP_st8-9	2015-08-06	Profiler (radius=10, n=0) : grkGFP_st8-9_0006.tab.txt	1	3	181	1.29	116	0.876	83	0.974	1.39759	99.5	NA
MS2/MCP	grkGFP_st8-9	2015-08-06	Profiler (radius=10, n=0) : grkGFP_st8-9_0006.tab.txt	1	3	188	3.711	86	0.882	70	0.863	1.22857	78	NA
MS2/MCP	grkGFP_st8-9	2015-08-06	Profiler (radius=10, n=0) : grkGFP_st8-9_0006.tab.txt	1	3	206	4.611	90	0.879	78	0.951	1.15385	84	NA
MS2/MCP	grkGFP_st8-9	2015-08-06	Profiler (radius=10, n=0) : grkGFP_st8-9_0006.tab.txt	1	3	212	6.249	115	0.903	80	0.981	1.4375	97.5	NA
MS2/MCP	grkGFP_st8-9	2015-08-06	Profiler (radius=10, n=0) : grkGFP_st8-9_0006.tab.txt	1	3	267	3.813	88	0.934	72	0.819	1.22222	80	NA
MS2/MCP	grkGFP_st8-9	2015-08-06	Profiler (radius=10, n=0) : grkGFP_st8-9_0006.tab.txt	1	3	368	4.597	181	0.849	118	0.905	1.5339	149.5	NA
MS2/MCP	grkGFP_st8-9	2015-08-06	Profiler (radius=10, n=0) : grkGFP_st8-9_0006.tab.txt	1	3	394	5.564	133	0.852	82	0.921	1.62195	107.5	NA
MS2/MCP	grkGFP_st8-9	2015-08-06	Profiler (radius=10, n=0) : grkGFP_st8-9_0009.tab.txt	2	1	46	NA	121	0.831	135	0.98	0.896296	128	NA
MS2/MCP	grkGFP_st8-9	2015-08-06	Profiler (radius=10, n=0) : grkGFP_st8-9_0009.tab.txt	2	1	66	NA	116	0.875	127	0.895	0.913386	121.5	NA
MS2/MCP	grkGFP_st8-9	2015-08-06	Profiler (radius=10, n=0) : grkGFP_st8-9_0009.tab.txt	2	1	107	NA	81	0.916	109	0.85	0.743119	95	NA
MS2/MCP	grkGFP_st8-9	2015-08-06	Profiler (radius=10, n=0) : grkGFP_st8-9_0009.tab.txt	2	1	142	NA	91	0.842	114	0.861	0.798246	102.5	NA
MS2/MCP	grkGFP_st8-9	2015-08-06	Profiler (radius=10, n=0) : grkGFP_st8-9_0011.tab.txt	3	1	162	NA	170	0.893	164	0.916	1.03659	167	NA
MS2/MCP	grkGFP_st8-9	2015-08-06	Profiler (radius=10, n=0) : grkGFP_st8-9_0011.tab.txt	3	1	196	NA	141	0.969	221	0.844	0.638009	181	NA
MS2/MCP	grkGFP_st8-9	2015-08-06	Profiler (radius=10, n=0) : grkGFP_st8-9_0011.tab.txt	3	1	256	NA	117	0.817	136	0.819	0.860294	126.5	NA
MS2/MCP	grkGFP_st8-9	2015-08-06	Profiler (radius=10, n=0) : grkGFP_st8-9_0018.tab.txt	4	1	5	NA	139	0.977	142	0.983	0.978873	140.5	NA
MS2/MCP	grkGFP_st8-9	2015-08-06	Profiler (radius=10, n=0) : grkGFP_st8-9_0018.tab.txt	4	1	34	NA	88	0.969	145	0.98	0.606897	116.5	NA
MS2/MCP	grkGFP_st8-9	2015-08-06	Profiler (radius=10, n=0) : grkGFP_st8-9_0018.tab.txt	4	1	116	NA	109	0.98	133	0.934	0.819549	121	NA
MS2/MCP	grkGFP_st8-9	2015-08-06	Profiler (radius=10, n=0) : grkGFP_st8-9_0018.tab.txt	4	1	118	NA	97	0.947	97	0.978	1	97	NA
MS2/MCP	grkGFP_st8-9	2015-08-06	Profiler (radius=10, n=0) : grkGFP_st8-9_0018.tab.txt	4	1	120	NA	112	0.962	110	0.94	1.01818	111	NA
MS2/MCP	grkGFP_st8-9	2015-08-06	Profiler (radius=10, n=0) : grkGFP_st8-9_0018.tab.txt	4	1	130	NA	89	0.93	116	0.985	0.767241	102.5	NA
MS2/MCP	grkGFP_st8-9	2015-08-06	Profiler (radius=10, n=0) : grkGFP_st8-9_0018.tab.txt	4	1	144	NA	129	0.945	108	0.957	1.19444	118.5	NA
MS2/MCP	grkGFP_st8-9	2015-08-06	Profiler (radius=10, n=0) : grkGFP_st8-9_0018.tab.txt	4	1	152	NA	100	0.987	146	0.977	0.684932	123	NA
MS2/MCP	grkGFP_st8-9	2015-08-06	Profiler (radius=10, n=0) : grkGFP_st8-9_0018.tab.txt	4	1	155	NA	86	0.876	88	0.934	0.977273	87	NA
MS2/MCP	grkGFP_st8-9	2015-08-06	Profiler (radius=10, n=0) : grkGFP_st8-9_0018.tab.txt	4	1	160	NA	126	0.809	70	0.966	1.8	98	NA
MS2/MCP	grkGFP_st8-9	2015-08-06	Profiler (radius=10, n=0) : grkGFP_st8-9_0018.tab.txt	4	1	165	NA	104	0.914	164	0.901	0.634146	134	NA
MS2/MCP	grkGFP_st8-9	2015-08-06	Profiler (radius=10, n=0) : grkGFP_st8-9_0018.tab.txt	4	1	175	NA	126	0.977	135	0.952	0.933333	130.5	NA
MS2/MCP	grkGFP_st8-9	2015-08-06	Profiler (radius=10, n=0) : grkGFP_st8-9_0018.tab.txt	4	1	197	NA	105	0.954	179	0.944	0.586592	142	NA
MS2/MCP	grkGFP_st8-9	2015-08-06	Profiler (radius=10, n=0) : grkGFP_st8-9_0018.tab.txt	4	1	212	NA	112	0.989	113	0.979	0.99115	112.5	NA
MS2/MCP	grkGFP_st8-9	2015-08-06	Profiler (radius=10, n=0) : grkGFP_st8-9_0018.tab.txt	4	1	240	NA	125	0.833	132	0.969	0.94697	128.5	NA
MS2/MCP	grkGFP_st8-9	2015-08-06	Profiler (radius=10, n=0) : grkGFP_st8-9_0018.tab.txt	4	1	261	NA	98	0.929	80	0.975	1.225	89	NA
MS2/MCP	grkGFP_st8-9	2015-08-06	Profiler (radius=10, n=0) : grkGFP_st8-9_0018.tab.txt	4	1	323	NA	153	0.945	119	0.896	1.28571	136	NA
MS2/MCP	grkGFP_st8-9	2015-08-06	Profiler (radius=10, n=0) : grkGFP_st8-9_0018.tab.txt	4	1	342	NA	105	0.886	162	0.95	0.648148	133.5	NA
MS2/MCP	grkGFP_st8-9	2015-08-06	Profiler (radius=10, n=0) : grkGFP_st8-9_0018.tab.txt	4	1	357	NA	81	0.865	115	0.937	0.704348	98	NA
MS2/MCP	grkGFP_st8-9	2015-08-06	Profiler (radius=10, n=0) : grkGFP_st8-9_0018.tab.txt	4	1	372	NA	72	0.854	125	0.869	0.576	98.5	NA
MS2/MCP	grkGFP_st8-9	2015-08-06	Profiler (radius=10, n=0) : grkGFP_st8-9_0018.tab.txt	4	1	373	NA	81	0.915	113	0.9	0.716814	97	NA
MS2/MCP	grkGFP_st8-9	2015-08-06	Profiler (radius=10, n=0) : grkGFP_st8-9_0018.tab.txt	4	1	385	NA	93	0.94	136	0.964	0.683824	114.5	NA
MS2/MCP	grkGFP_st8-9	2015-08-06	Profiler (radius=10, n=0) : grkGFP_st8-9_0018.tab.txt	4	1	407	NA	80	0.965	107	0.955	0.747664	93.5	NA
MS2/MCP	grkGFP_st8-9	2015-08-06	Profiler (radius=10, n=0) : grkGFP_st8-9_0018.tab.txt	4	1	443	NA	133	0.865	88	0.932	1.51136	110.5	NA
MS2/MCP	grkGFP_st8-9	2015-08-06	Profiler (radius=10, n=0) : grkGFP_st8-9_0018.tab.txt	4	1	477	NA	115	0.897	164	0.963	0.70122	139.5	NA
MS2/MCP	grkGFP_st8-9	2015-08-06	Profiler (radius=10, n=0) : grkGFP_st8-9_0018.tab.txt	4	1	492	NA	91	0.889	136	0.906	0.669118	113.5	NA
MS2/MCP	grkGFP_st8-9	2015-08-06	Profiler (radius=10, n=0) : grkGFP_st8-9_0018.tab.txt	4	1	497	NA	118	0.811	64	0.93	1.84375	91	NA
MS2/MCP	grkGFP_st8-9	2015-08-06	Profiler (radius=10, n=0) : grkGFP_st8-9_0018.tab.txt	4	1	498	NA	90	0.919	70	0.87	1.28571	80	NA
MS2/MCP	grkGFP_st8-9	2015-08-06	Profiler (radius=10, n=0) : grkGFP_st8-9_0018.tab.txt	4	1	514	NA	105	0.881	96	0.94	1.09375	100.5	NA
MS2/MCP	grkGFP_st8-9	2015-08-06	Profiler (radius=10, n=0) : grkGFP_st8-9_0018.tab.txt	4	1	609	NA	137	0.941	185	0.881	0.740541	161	NA
MS2/MCP	grkGFP_st8-9	2015-08-06	Profiler (radius=10, n=0) : grkGFP_st8-9_0018.tab.txt	4	1	611	NA	110	0.949	101	0.973	1.08911	105.5	NA
MS2/MCP	grkGFP_st8-9	2015-08-06	Profiler (radius=10, n=0) : grkGFP_st8-9_0018.tab.txt	4	1	661	NA	79	0.86	56	0.876	1.41071	67.5	NA
MS2/MCP	grkGFP_st8-9	2015-08-06	Profiler (radius=10, n=0) : grkGFP_st8-9_0018.tab.txt	4	1	704	NA	70	0.853	112	0.858	0.625	91	NA
MS2/MCP	grkGFP_st8-9	2015-08-06	Profiler (radius=10, n=0) : grkGFP_st8-9_0018.tab.txt	4	1	723	NA	173	0.91	135	0.914	1.28148	154	NA
MS2/MCP	grkGFP_st8-9	2015-08-06	Profiler (radius=10, n=0) : grkGFP_st8-9_0022.tab.txt	4	2	1	NA	128	0.861	121	0.94	1.05785	124.5	NA
MS2/MCP	grkGFP_st8-9	2015-08-06	Profiler (radius=10, n=0) : grkGFP_st8-9_0022.tab.txt	4	2	12	NA	103	0.865	164	0.906	0.628049	133.5	NA
MS2/MCP	grkGFP_st8-9	2015-08-06	Profiler (radius=10, n=0) : grkGFP_st8-9_0022.tab.txt	4	2	32	NA	100	0.96	92	0.941	1.08696	96	NA
MS2/MCP	grkGFP_st8-9	2015-08-06	Profiler (radius=10, n=0) : grkGFP_st8-9_0022.tab.txt	4	2	36	NA	142	0.932	152	0.927	0.934211	147	NA
MS2/MCP	grkGFP_st8-9	2015-08-06	Profiler (radius=10, n=0) : grkGFP_st8-9_0022.tab.txt	4	2	55	NA	130	0.987	222	0.931	0.585586	176	NA
MS2/MCP	grkGFP_st8-9	2015-08-06	Profiler (radius=10, n=0) : grkGFP_st8-9_0022.tab.txt	4	2	63	NA	143	0.941	130	0.962	1.1	136.5	NA
MS2/MCP	grkGFP_st8-9	2015-08-06	Profiler (radius=10, n=0) : grkGFP_st8-9_0022.tab.txt	4	2	66	NA	90	0.951	147	0.953	0.612245	118.5	NA
MS2/MCP	grkGFP_st8-9	2015-08-06	Profiler (radius=10, n=0) : grkGFP_st8-9_0022.tab.txt	4	2	70	NA	102	0.859	183	0.935	0.557377	142.5	NA
MS2/MCP	grkGFP_st8-9	2015-08-06	Profiler (radius=10, n=0) : grkGFP_st8-9_0022.tab.txt	4	2	81	NA	129	0.927	155	0.887	0.832258	142	NA
MS2/MCP	grkGFP_st8-9	2015-08-06	Profiler (radius=10, n=0) : grkGFP_st8-9_0022.tab.txt	4	2	91	NA	191	0.913	176	0.869	1.08523	183.5	NA
MS2/MCP	grkGFP_st8-9	2015-08-06	Profiler (radius=10, n=0) : grkGFP_st8-9_0022.tab.txt	4	2	96	NA	107	0.967	160	0.889	0.66875	133.5	NA
MS2/MCP	grkGFP_st8-9	2015-08-06	Profiler (radius=10, n=0) : grkGFP_st8-9_0022.tab.txt	4	2	111	NA	156	0.803	106	0.95	1.4717	131	NA
MS2/MCP	grkGFP_st8-9	2015-08-06	Profiler (radius=10, n=0) : grkGFP_st8-9_0022.tab.txt	4	2	112	NA	98	0.899	136	0.977	0.720588	117	NA
MS2/MCP	grkGFP_st8-9	2015-08-06	Profiler (radius=10, n=0) : grkGFP_st8-9_0022.tab.txt	4	2	122	NA	90	0.964	112	0.982	0.803571	101	NA
MS2/MCP	grkGFP_st8-9	2015-08-06	Profiler (radius=10, n=0) : grkGFP_st8-9_0022.tab.txt	4	2	124	NA	124	0.957	134	0.886	0.925373	129	NA
MS2/MCP	grkGFP_st8-9	2015-08-06	Profiler (radius=10, n=0) : grkGFP_st8-9_0022.tab.txt	4	2	125	NA	155	0.918	225	0.897	0.688889	190	NA
MS2/MCP	grkGFP_st8-9	2015-08-06	Profiler (radius=10, n=0) : grkGFP_st8-9_0022.tab.txt	4	2	129	NA	210	0.974	158	0.839	1.32911	184	NA
MS2/MCP	grkGFP_st8-9	2015-08-06	Profiler (radius=10, n=0) : grkGFP_st8-9_0022.tab.txt	4	2	133	NA	154	0.963	110	0.968	1.4	132	NA
MS2/MCP	grkGFP_st8-9	2015-08-06	Profiler (radius=10, n=0) : grkGFP_st8-9_0022.tab.txt	4	2	167	NA	103	0.967	75	0.809	1.37333	89	NA
MS2/MCP	grkGFP_st8-9	2015-08-06	Profiler (radius=10, n=0) : grkGFP_st8-9_0022.tab.txt	4	2	187	NA	185	0.982	135	0.965	1.37037	160	NA
MS2/MCP	grkGFP_st8-9	2015-08-06	Profiler (radius=10, n=0) : grkGFP_st8-9_0022.tab.txt	4	2	196	NA	122	0.892	67	0.971	1.8209	94.5	NA
MS2/MCP	grkGFP_st8-9	2015-08-06	Profiler (radius=10, n=0) : grkGFP_st8-9_0022.tab.txt	4	2	211	NA	76	0.959	57	0.88	1.33333	66.5	NA
MS2/MCP	grkGFP_st8-9	2015-08-06	Profiler (radius=10, n=0) : grkGFP_st8-9_0022.tab.txt	4	2	261	NA	105	0.914	130	0.823	0.807692	117.5	NA
MS2/MCP	grkGFP_st8-9	2015-08-06	Profiler (radius=10, n=0) : grkGFP_st8-9_0022.tab.txt	4	2	296	NA	177	0.98	120	0.906	1.475	148.5	NA
MS2/MCP	grkGFP_st8-9	2015-08-06	Profiler (radius=10, n=0) : grkGFP_st8-9_0022.tab.txt	4	2	301	NA	119	0.839	92	0.982	1.29348	105.5	NA
MS2/MCP	grkGFP_st8-9	2015-08-06	Profiler (radius=10, n=0) : grkGFP_st8-9_0022.tab.txt	4	2	314	NA	93	0.96	144	0.843	0.645833	118.5	NA
MS2/MCP	grkGFP_st8-9	2015-08-06	Profiler (radius=10, n=0) : grkGFP_st8-9_0022.tab.txt	4	2	367	NA	83	0.943	150	0.968	0.553333	116.5	NA
MS2/MCP	grkGFP_st8-9	2015-08-06	Profiler (radius=10, n=0) : grkGFP_st8-9_0022.tab.txt	4	2	407	NA	152	0.852	244	0.877	0.622951	198	NA
MS2/MCP	grkGFP_st8-9	2015-08-06	Profiler (radius=10, n=0) : grkGFP_st8-9_0022.tab.txt	4	2	409	NA	103	0.939	71	0.815	1.4507	87	NA
MS2/MCP	grkGFP_st8-9	2015-08-06	Profiler (radius=10, n=0) : grkGFP_st8-9_0022.tab.txt	4	2	411	NA	164	0.908	119	0.869	1.37815	141.5	NA
MS2/MCP	grkGFP_st8-9	2015-08-06	Profiler (radius=10, n=0) : grkGFP_st8-9_0022.tab.txt	4	2	453	NA	140	0.913	119	0.825	1.17647	129.5	NA
MS2/MCP	grkGFP_st8-9	2015-08-06	Profiler (radius=10, n=0) : grkGFP_st8-9_0022.tab.txt	4	2	462	NA	119	0.96	155	0.872	0.767742	137	NA
MS2/MCP	grkGFP_st8-9	2015-08-06	Profiler (radius=10, n=0) : grkGFP_st8-9_0022.tab.txt	4	2	479	NA	143	0.834	138	0.804	1.03623	140.5	NA
MS2/MCP	grkGFP_st8-9	2015-08-06	Profiler (radius=10, n=0) : grkGFP_st8-9_0022.tab.txt	4	2	549	NA	64	0.941	85	0.931	0.752941	74.5	NA
MS2/MCP	grkGFP_st8-9	2015-08-06	Profiler (radius=10, n=0) : grkGFP_st8-9_0022.tab.txt	4	2	563	NA	75	0.865	77	0.961	0.974026	76	NA
MS2/MCP	grkGFP_st8-9	2015-08-06	Profiler (radius=10, n=0) : grkGFP_st8-9_0022.tab.txt	4	2	570	NA	117	0.954	60	0.871	1.95	88.5	NA
MS2/MCP	grkGFP_st8-9	2015-08-06	Profiler (radius=10, n=0) : grkGFP_st8-9_0022.tab.txt	4	2	622	NA	205	0.806	168	0.973	1.22024	186.5	NA
MS2/MCP	grkGFP_st8-9	2015-08-06	Profiler (radius=10, n=0) : grkGFP_st8-9_0022.tab.txt	4	2	638	NA	55	0.806	74	0.894	0.743243	64.5	NA
MS2/MCP	grkGFP_st8-9	2015-08-06	Profiler (radius=10, n=0) : grkGFP_st8-9_0026.tab.txt	4	3	5	NA	117	0.925	74	0.896	1.58108	95.5	NA
MS2/MCP	grkGFP_st8-9	2015-08-06	Profiler (radius=10, n=0) : grkGFP_st8-9_0026.tab.txt	4	3	7	NA	73	0.913	114	0.967	0.640351	93.5	NA
MS2/MCP	grkGFP_st8-9	2015-08-06	Profiler (radius=10, n=0) : grkGFP_st8-9_0026.tab.txt	4	3	22	NA	152	0.898	160	0.866	0.95	156	NA
MS2/MCP	grkGFP_st8-9	2015-08-06	Profiler (radius=10, n=0) : grkGFP_st8-9_0026.tab.txt	4	3	39	NA	73	0.913	72	0.825	1.01389	72.5	NA
MS2/MCP	grkGFP_st8-9	2015-08-06	Profiler (radius=10, n=0) : grkGFP_st8-9_0026.tab.txt	4	3	49	NA	127	0.99	85	0.981	1.49412	106	NA
MS2/MCP	grkGFP_st8-9	2015-08-06	Profiler (radius=10, n=0) : grkGFP_st8-9_0026.tab.txt	4	3	70	NA	129	0.944	93	0.863	1.3871	111	NA
MS2/MCP	grkGFP_st8-9	2015-08-06	Profiler (radius=10, n=0) : grkGFP_st8-9_0026.tab.txt	4	3	112	NA	161	0.874	120	0.967	1.34167	140.5	NA
MS2/MCP	grkGFP_st8-9	2015-08-06	Profiler (radius=10, n=0) : grkGFP_st8-9_0026.tab.txt	4	3	137	NA	112	0.954	84	0.945	1.33333	98	NA
MS2/MCP	grkGFP_st8-9	2015-08-06	Profiler (radius=10, n=0) : grkGFP_st8-9_0026.tab.txt	4	3	141	NA	82	0.886	122	0.924	0.672131	102	NA
MS2/MCP	grkGFP_st8-9	2015-08-06	Profiler (radius=10, n=0) : grkGFP_st8-9_0026.tab.txt	4	3	188	NA	59	0.916	67	0.924	0.880597	63	NA
MS2/MCP	grkGFP_st8-9	2015-08-06	Profiler (radius=10, n=0) : grkGFP_st8-9_0026.tab.txt	4	3	200	NA	141	0.967	99	0.807	1.42424	120	NA
MS2/MCP	grkGFP_st8-9	2015-08-06	Profiler (radius=10, n=0) : grkGFP_st8-9_0026.tab.txt	4	3	306	NA	143	0.919	152	0.9	0.940789	147.5	NA
MS2/MCP	grkGFP_st8-9	2015-08-06	Profiler (radius=10, n=0) : grkGFP_st8-9_0026.tab.txt	4	3	326	NA	78	0.97	104	0.803	0.75	91	NA
MS2/MCP	grkGFP_st8-9	2015-08-06	Profiler (radius=10, n=0) : grkGFP_st8-9_0026.tab.txt	4	3	343	NA	76	0.933	144	0.905	0.527778	110	NA
MS2/MCP	grkGFP_st8-9	2015-08-06	Profiler (radius=10, n=0) : grkGFP_st8-9_0026.tab.txt	4	3	371	NA	90	0.811	154	0.907	0.584416	122	NA
MS2/MCP	grkGFP_st8-9	2015-08-06	Profiler (radius=10, n=0) : grkGFP_st8-9_0026.tab.txt	4	3	432	NA	88	0.889	89	0.881	0.988764	88.5	NA
MS2/MCP	grkGFP_st8-9	2015-08-06	Profiler (radius=10, n=0) : grkGFP_st8-9_0026.tab.txt	4	3	554	NA	144	0.866	120	0.959	1.2	132	NA
MS2/MCP	grkGFP_st8-9	2015-08-06	Profiler (radius=10, n=0) : grkGFP_st8-9_0026.tab.txt	4	3	569	NA	117	0.909	147	0.863	0.795918	132	NA
MS2/MCP	grkGFP_st8-9	2015-08-06	Profiler (radius=10, n=0) : grkGFP_st8-9_0026.tab.txt	4	3	587	NA	78	0.922	79	0.982	0.987342	78.5	NA
MS2/MCP	grkGFP_st8-9	2015-08-06	Profiler (radius=10, n=0) : grkGFP_st8-9_0041.tab.txt	6	2	34	NA	183	0.957	172	0.804	1.06395	177.5	NA
MS2/MCP	grkGFP_st8-9	2015-08-06	Profiler (radius=10, n=0) : grkGFP_st8-9_0041.tab.txt	6	2	36	NA	257	0.804	186	0.84	1.38172	221.5	NA
MS2/MCP	grkGFP_st8-9	2015-08-06	Profiler (radius=10, n=0) : grkGFP_st8-9_0041.tab.txt	6	2	49	NA	93	0.858	111	0.949	0.837838	102	NA
MS2/MCP	grkGFP_st8-9	2015-08-06	Profiler (radius=10, n=0) : grkGFP_st8-9_0041.tab.txt	6	2	56	NA	95	0.934	106	0.966	0.896226	100.5	NA
MS2/MCP	grkGFP_st8-9	2015-08-06	Profiler (radius=10, n=0) : grkGFP_st8-9_0041.tab.txt	6	2	156	NA	131	0.846	114	0.874	1.14912	122.5	NA
MS2/MCP	grkGFP_st8-9	2015-08-06	Profiler (radius=10, n=0) : grkGFP_st8-9_0041.tab.txt	6	2	212	NA	65	0.924	82	0.849	0.792683	73.5	NA
MS2/MCP	grkGFP_st8-9	2015-08-06	Profiler (radius=10, n=0) : grkGFP_st8-9_0047.tab.txt	7	2	68	NA	127	0.844	122	0.979	1.04098	124.5	NA
MS2/MCP	grkGFP_st8-9	2015-08-06	Profiler (radius=10, n=0) : grkGFP_st8-9_0047.tab.txt	7	2	72	NA	80	0.931	136	0.978	0.588235	108	NA
MS2/MCP	grkGFP_st8-9	2015-08-06	Profiler (radius=10, n=0) : grkGFP_st8-9_0047.tab.txt	7	2	113	NA	134	0.883	256	0.94	0.523438	195	NA
MS2/MCP	grkGFP_st8-9	2015-08-06	Profiler (radius=10, n=0) : grkGFP_st8-9_0047.tab.txt	7	2	267	NA	99	0.874	90	0.874	1.1	94.5	NA
MS2/MCP	grkGFP_st8-9	2015-08-06	Profiler (radius=10, n=0) : grkGFP_st8-9_0047.tab.txt	7	2	497	NA	104	0.801	53	0.883	1.96226	78.5	NA
MS2/MCP	grkGFP_st8-9	2015-08-06	Profiler (radius=10, n=0) : grkGFP_st8-9_0050.tab.txt	8	1	49	NA	112	0.906	165	0.98	0.678788	138.5	NA
MS2/MCP	grkGFP_st8-9	2015-08-06	Profiler (radius=10, n=0) : grkGFP_st8-9_0050.tab.txt	8	1	63	NA	128	0.958	87	0.958	1.47126	107.5	NA
MS2/MCP	grkGFP_st8-9	2015-08-06	Profiler (radius=10, n=0) : grkGFP_st8-9_0050.tab.txt	8	1	104	NA	105	0.956	86	0.945	1.22093	95.5	NA
MS2/MCP	grkGFP_st8-9	2015-08-06	Profiler (radius=10, n=0) : grkGFP_st8-9_0050.tab.txt	8	1	144	NA	270	0.837	231	0.851	1.16883	250.5	NA
MS2/MCP	grkGFP_st8-9	2015-08-06	Profiler (radius=10, n=0) : grkGFP_st8-9_0050.tab.txt	8	1	167	NA	94	0.954	132	0.923	0.712121	113	NA
MS2/MCP	grkGFP_st8-9	2015-08-06	Profiler (radius=10, n=0) : grkGFP_st8-9_0050.tab.txt	8	1	224	NA	269	0.888	140	0.823	1.92143	204.5	NA
MS2/MCP	grkGFP_st8-9	2015-08-06	Profiler (radius=10, n=0) : grkGFP_st8-9_0050.tab.txt	8	1	226	NA	180	0.838	263	0.813	0.684411	221.5	NA
MS2/MCP	grkGFP_st8-9	2015-08-06	Profiler (radius=10, n=0) : grkGFP_st8-9_0050.tab.txt	8	1	303	NA	70	0.866	131	0.853	0.534351	100.5	NA
MS2/MCP	grkGFP_st8-9	2015-08-06	Profiler (radius=10, n=0) : grkGFP_st8-9_0050.tab.txt	8	1	313	NA	167	0.856	162	0.821	1.03086	164.5	NA
MS2/MCP	grkGFP_st8-9	2015-08-06	Profiler (radius=10, n=0) : grkGFP_st8-9_0050.tab.txt	8	1	321	NA	156	0.915	238	0.906	0.655462	197	NA
MS2/MCP	grkGFP_st8-9	2015-08-06	Profiler (radius=10, n=0) : grkGFP_st8-9_0050.tab.txt	8	1	341	NA	79	0.878	81	0.93	0.975309	80	NA
MS2/MCP	grkGFP_st8-9	2015-08-06	Profiler (radius=10, n=0) : grkGFP_st8-9_0050.tab.txt	8	1	343	NA	140	0.883	150	0.94	0.933333	145	NA
MS2/MCP	grkGFP_st8-9	2015-08-06	Profiler (radius=10, n=0) : grkGFP_st8-9_0050.tab.txt	8	1	444	NA	91	0.887	177	0.944	0.514124	134	NA
MS2/MCP	grkGFP_st8-9	2015-08-06	Profiler (radius=10, n=0) : grkGFP_st8-9_0050.tab.txt	8	1	550	NA	48	0.871	88	0.819	0.545455	68	NA
MS2/MCP	grkGFP_st8-9	2015-08-06	Profiler (radius=10, n=0) : grkGFP_st8-9_0050.tab.txt	8	1	564	NA	78	0.819	89	0.808	0.876404	83.5	NA
MS2/MCP	grkGFP_st8-9	2015-08-06	Profiler (radius=10, n=0) : grkGFP_st8-9_0050.tab.txt	8	1	598	NA	108	0.831	187	0.911	0.57754	147.5	NA
MS2/MCP	grkGFP_st8-9	2015-08-06	Profiler (radius=10, n=0) : grkGFP_st8-9_0050.tab.txt	8	1	657	NA	105	0.865	130	0.848	0.807692	117.5	NA
MS2/MCP	grkGFP_st8-9	2015-08-06	Profiler (radius=10, n=0) : grkGFP_st8-9_0053.tab.txt	8	2	5	NA	159	0.904	107	0.94	1.48598	133	NA
MS2/MCP	grkGFP_st8-9	2015-08-06	Profiler (radius=10, n=0) : grkGFP_st8-9_0053.tab.txt	8	2	28	NA	85	0.96	108	0.962	0.787037	96.5	NA
MS2/MCP	grkGFP_st8-9	2015-08-06	Profiler (radius=10, n=0) : grkGFP_st8-9_0053.tab.txt	8	2	30	NA	131	0.848	177	0.957	0.740113	154	NA
MS2/MCP	grkGFP_st8-9	2015-08-06	Profiler (radius=10, n=0) : grkGFP_st8-9_0053.tab.txt	8	2	74	NA	82	0.917	138	0.911	0.594203	110	NA
MS2/MCP	grkGFP_st8-9	2015-08-06	Profiler (radius=10, n=0) : grkGFP_st8-9_0053.tab.txt	8	2	91	NA	100	0.947	73	0.969	1.36986	86.5	NA
MS2/MCP	grkGFP_st8-9	2015-08-06	Profiler (radius=10, n=0) : grkGFP_st8-9_0053.tab.txt	8	2	119	NA	142	0.957	120	0.845	1.18333	131	NA
MS2/MCP	grkGFP_st8-9	2015-08-06	Profiler (radius=10, n=0) : grkGFP_st8-9_0053.tab.txt	8	2	137	NA	76	0.915	101	0.928	0.752475	88.5	NA
MS2/MCP	grkGFP_st8-9	2015-08-06	Profiler (radius=10, n=0) : grkGFP_st8-9_0053.tab.txt	8	2	254	NA	104	0.964	142	0.96	0.732394	123	NA
MS2/MCP	grkGFP_st8-9	2015-08-06	Profiler (radius=10, n=0) : grkGFP_st8-9_0053.tab.txt	8	2	257	NA	271	0.915	232	0.868	1.1681	251.5	NA
MS2/MCP	grkGFP_st8-9	2015-08-06	Profiler (radius=10, n=0) : grkGFP_st8-9_0053.tab.txt	8	2	297	NA	101	0.931	143	0.874	0.706294	122	NA
MS2/MCP	grkGFP_st8-9	2015-08-06	Profiler (radius=10, n=0) : grkGFP_st8-9_0053.tab.txt	8	2	324	NA	62	0.832	111	0.839	0.558559	86.5	NA
MS2/MCP	grkGFP_st8-9	2015-08-06	Profiler (radius=10, n=0) : grkGFP_st8-9_0053.tab.txt	8	2	373	NA	72	0.868	97	0.927	0.742268	84.5	NA
MS2/MCP	grkGFP_st8-9	2015-08-06	Profiler (radius=10, n=0) : grkGFP_st8-9_0053.tab.txt	8	2	383	NA	114	0.862	121	0.856	0.942149	117.5	NA
MS2/MCP	grkGFP_st8-9	2015-08-06	Profiler (radius=10, n=0) : grkGFP_st8-9_0053.tab.txt	8	2	407	NA	175	0.933	180	0.822	0.972222	177.5	NA
MS2/MCP	grkGFP_st8-9	2015-08-06	Profiler (radius=10, n=0) : grkGFP_st8-9_0053.tab.txt	8	2	432	NA	126	0.86	141	0.872	0.893617	133.5	NA
MS2/MCP	grkGFP_st8-9	2015-08-06	Profiler (radius=10, n=0) : grkGFP_st8-9_0060.tab.txt	8	3	7	NA	74	0.966	97	0.908	0.762887	85.5	NA
MS2/MCP	grkGFP_st8-9	2015-08-06	Profiler (radius=10, n=0) : grkGFP_st8-9_0060.tab.txt	8	3	9	NA	133	0.937	72	0.956	1.84722	102.5	NA
MS2/MCP	grkGFP_st8-9	2015-08-06	Profiler (radius=10, n=0) : grkGFP_st8-9_0060.tab.txt	8	3	17	NA	119	0.943	86	0.843	1.38372	102.5	NA
MS2/MCP	grkGFP_st8-9	2015-08-06	Profiler (radius=10, n=0) : grkGFP_st8-9_0060.tab.txt	8	3	18	NA	93	0.91	85	0.804	1.09412	89	NA
MS2/MCP	grkGFP_st8-9	2015-08-06	Profiler (radius=10, n=0) : grkGFP_st8-9_0060.tab.txt	8	3	20	NA	90	0.945	110	0.93	0.818182	100	NA
MS2/MCP	grkGFP_st8-9	2015-08-06	Profiler (radius=10, n=0) : grkGFP_st8-9_0060.tab.txt	8	3	29	NA	61	0.935	97	0.932	0.628866	79	NA
MS2/MCP	grkGFP_st8-9	2015-08-06	Profiler (radius=10, n=0) : grkGFP_st8-9_0060.tab.txt	8	3	37	NA	75	0.961	72	0.925	1.04167	73.5	NA
MS2/MCP	grkGFP_st8-9	2015-08-06	Profiler (radius=10, n=0) : grkGFP_st8-9_0060.tab.txt	8	3	43	NA	78	0.982	88	0.923	0.886364	83	NA
MS2/MCP	grkGFP_st8-9	2015-08-06	Profiler (radius=10, n=0) : grkGFP_st8-9_0060.tab.txt	8	3	48	NA	73	0.861	45	0.823	1.62222	59	NA
MS2/MCP	grkGFP_st8-9	2015-08-06	Profiler (radius=10, n=0) : grkGFP_st8-9_0060.tab.txt	8	3	89	NA	74	0.877	106	0.894	0.698113	90	NA
MS2/MCP	grkGFP_st8-9	2015-08-06	Profiler (radius=10, n=0) : grkGFP_st8-9_0060.tab.txt	8	3	109	NA	107	0.876	88	0.889	1.21591	97.5	NA
MS2/MCP	grkGFP_st8-9	2015-08-06	Profiler (radius=10, n=0) : grkGFP_st8-9_0065.tab.txt	x7	2	5	NA	131	0.891	90	0.962	1.45556	110.5	NA
MS2/MCP	grkGFP_st8-9	2015-08-06	Profiler (radius=10, n=0) : grkGFP_st8-9_0065.tab.txt	x7	2	24	NA	90	0.842	79	0.939	1.13924	84.5	NA
MS2/MCP	grkGFP_st8-9	2015-08-06	Profiler (radius=10, n=0) : grkGFP_st8-9_0065.tab.txt	x7	2	29	NA	108	0.892	166	0.871	0.650602	137	NA
MS2/MCP	grkGFP_st8-9	2015-08-06	Profiler (radius=10, n=0) : grkGFP_st8-9_0065.tab.txt	x7	2	48	NA	88	0.976	119	0.939	0.739496	103.5	NA
MS2/MCP	grkGFP_st8-9	2015-08-06	Profiler (radius=10, n=0) : grkGFP_st8-9_0065.tab.txt	x7	2	65	NA	90	0.955	124	0.936	0.725806	107	NA
MS2/MCP	grkGFP_st8-9	2015-08-06	Profiler (radius=10, n=0) : grkGFP_st8-9_0065.tab.txt	x7	2	87	NA	57	0.814	85	0.857	0.670588	71	NA
MS2/MCP	grkGFP_st8-9	2015-08-06	Profiler (radius=10, n=0) : grkGFP_st8-9_0065.tab.txt	x7	2	93	NA	94	0.838	71	0.806	1.32394	82.5	NA
MS2/MCP	grkGFP_st8-9	2015-08-06	Profiler (radius=10, n=0) : grkGFP_st8-9_0065.tab.txt	x7	2	102	NA	130	0.851	180	0.843	0.722222	155	NA
MS2/MCP	grkGFP_st8-9	2015-08-06	Profiler (radius=10, n=0) : grkGFP_st8-9_0065.tab.txt	x7	2	116	NA	55	0.82	99	0.874	0.555556	77	NA
MS2/MCP	grkGFP_st8-9	2015-08-06	Profiler (radius=10, n=0) : grkGFP_st8-9_0065.tab.txt	x7	2	127	NA	56	0.874	73	0.959	0.767123	64.5	NA
MS2/MCP	grkGFP_st8-9	2015-08-06	Profiler (radius=10, n=0) : grkGFP_st8-9_0069.tab.txt	x8	1	26	NA	77	0.952	58	0.916	1.32759	67.5	NA
MS2/MCP	grkGFP_st8-9	2015-08-06	Profiler (radius=10, n=0) : grkGFP_st8-9_0073.tab.txt	9	1	6	NA	67	0.973	76	0.947	0.881579	71.5	NA
MS2/MCP	grkGFP_st8-9	2015-08-06	Profiler (radius=10, n=0) : grkGFP_st8-9_0073.tab.txt	9	1	13	NA	91	0.853	61	0.806	1.4918	76	NA
MS2/MCP	grkGFP_st8-9	2015-08-06	Profiler (radius=10, n=0) : grkGFP_st8-9_0073.tab.txt	9	1	19	NA	108	0.975	106	0.963	1.01887	107	NA
MS2/MCP	grkGFP_st8-9	2015-08-06	Profiler (radius=10, n=0) : grkGFP_st8-9_0073.tab.txt	9	1	28	NA	89	0.977	109	0.898	0.816514	99	NA
MS2/MCP	grkGFP_st8-9	2015-08-06	Profiler (radius=10, n=0) : grkGFP_st8-9_0073.tab.txt	9	1	50	NA	69	0.88	56	0.8	1.23214	62.5	NA
MS2/MCP	grkGFP_st8-9	2015-08-06	Profiler (radius=10, n=0) : grkGFP_st8-9_0073.tab.txt	9	1	62	NA	68	0.985	134	0.957	0.507463	101	NA
MS2/MCP	grkGFP_st8-9	2015-08-06	Profiler (radius=10, n=0) : grkGFP_st8-9_0073.tab.txt	9	1	68	NA	74	0.919	92	0.941	0.804348	83	NA
MS2/MCP	grkGFP_st8-9	2015-08-06	Profiler (radius=10, n=0) : grkGFP_st8-9_0073.tab.txt	9	1	71	NA	78	0.939	149	0.963	0.52349	113.5	NA
MS2/MCP	grkGFP_st8-9	2015-08-06	Profiler (radius=10, n=0) : grkGFP_st8-9_0073.tab.txt	9	1	74	NA	99	0.995	92	0.929	1.07609	95.5	NA
MS2/MCP	grkGFP_st8-9	2015-08-06	Profiler (radius=10, n=0) : grkGFP_st8-9_0073.tab.txt	9	1	83	NA	93	0.863	99	0.966	0.939394	96	NA
MS2/MCP	grkGFP_st8-9	2015-08-06	Profiler (radius=10, n=0) : grkGFP_st8-9_0073.tab.txt	9	1	85	NA	77	0.965	108	0.97	0.712963	92.5	NA
MS2/MCP	grkGFP_st8-9	2015-08-06	Profiler (radius=10, n=0) : grkGFP_st8-9_0073.tab.txt	9	1	91	NA	65	0.896	108	0.952	0.601852	86.5	NA
MS2/MCP	grkGFP_st8-9	2015-08-06	Profiler (radius=10, n=0) : grkGFP_st8-9_0073.tab.txt	9	1	106	NA	73	0.928	101	0.823	0.722772	87	NA
MS2/MCP	grkGFP_st8-9	2015-08-06	Profiler (radius=10, n=0) : grkGFP_st8-9_0073.tab.txt	9	1	119	NA	71	0.965	100	0.969	0.71	85.5	NA
MS2/MCP	grkGFP_st8-9	2015-08-06	Profiler (radius=10, n=0) : grkGFP_st8-9_0073.tab.txt	9	1	122	NA	85	0.831	85	0.856	1	85	NA
MS2/MCP	grkGFP_st8-9	2015-08-06	Profiler (radius=10, n=0) : grkGFP_st8-9_0073.tab.txt	9	1	131	NA	98	0.94	81	0.918	1.20988	89.5	NA
MS2/MCP	grkGFP_st8-9	2015-08-06	Profiler (radius=10, n=0) : grkGFP_st8-9_0073.tab.txt	9	1	168	NA	73	0.856	88	0.956	0.829545	80.5	NA
MS2/MCP	grkGFP_st8-9	2015-08-06	Profiler (radius=10, n=0) : grkGFP_st8-9_0073.tab.txt	9	1	195	NA	86	0.874	133	0.876	0.646617	109.5	NA
MS2/MCP	grkGFP_st8-9	2015-08-06	Profiler (radius=10, n=0) : grkGFP_st8-9_0073.tab.txt	9	1	202	NA	57	0.81	74	0.967	0.77027	65.5	NA
MS2/MCP	grkGFP_st8-9	2015-08-06	Profiler (radius=10, n=0) : grkGFP_st8-9_0073.tab.txt	9	1	205	NA	69	0.919	128	0.898	0.539062	98.5	NA
MS2/MCP	grkGFP_st8-9	2015-08-06	Profiler (radius=10, n=0) : grkGFP_st8-9_0073.tab.txt	9	1	215	NA	90	0.979	138	0.893	0.652174	114	NA
MS2/MCP	grkGFP_st8-9	2015-08-06	Profiler (radius=10, n=0) : grkGFP_st8-9_0073.tab.txt	9	1	223	NA	118	0.969	189	0.928	0.624339	153.5	NA
MS2/MCP	grkGFP_st8-9	2015-08-06	Profiler (radius=10, n=0) : grkGFP_st8-9_0073.tab.txt	9	1	243	NA	87	0.911	111	0.946	0.783784	99	NA
MS2/MCP	grkGFP_st8-9	2015-08-06	Profiler (radius=10, n=0) : grkGFP_st8-9_0073.tab.txt	9	1	248	NA	88	0.98	164	0.899	0.536585	126	NA
MS2/MCP	grkGFP_st8-9	2015-08-06	Profiler (radius=10, n=0) : grkGFP_st8-9_0073.tab.txt	9	1	255	NA	79	0.862	101	0.871	0.782178	90	NA
MS2/MCP	grkGFP_st8-9	2015-08-06	Profiler (radius=10, n=0) : grkGFP_st8-9_0073.tab.txt	9	1	269	NA	61	0.845	59	0.832	1.0339	60	NA
MS2/MCP	grkGFP_st8-9	2015-08-06	Profiler (radius=10, n=0) : grkGFP_st8-9_0073.tab.txt	9	1	279	NA	58	0.918	97	0.865	0.597938	77.5	NA
MS2/MCP	grkGFP_st8-9	2015-08-06	Profiler (radius=10, n=0) : grkGFP_st8-9_0073.tab.txt	9	1	283	NA	79	0.945	84	0.869	0.940476	81.5	NA
MS2/MCP	grkGFP_st8-9	2015-08-06	Profiler (radius=10, n=0) : grkGFP_st8-9_0073.tab.txt	9	1	296	NA	90	0.935	115	0.918	0.782609	102.5	NA
MS2/MCP	grkGFP_st8-9	2015-08-06	Profiler (radius=10, n=0) : grkGFP_st8-9_0073.tab.txt	9	1	303	NA	76	0.898	98	0.863	0.77551	87	NA
MS2/MCP	grkGFP_st8-9	2015-08-06	Profiler (radius=10, n=0) : grkGFP_st8-9_0073.tab.txt	9	1	332	NA	81	0.942	86	0.943	0.94186	83.5	NA
MS2/MCP	grkGFP_st8-9	2015-08-06	Profiler (radius=10, n=0) : grkGFP_st8-9_0073.tab.txt	9	1	335	NA	115	0.936	110	0.977	1.04545	112.5	NA
MS2/MCP	grkGFP_st8-9	2015-08-06	Profiler (radius=10, n=0) : grkGFP_st8-9_0073.tab.txt	9	1	348	NA	53	0.8	62	0.894	0.854839	57.5	NA
MS2/MCP	grkGFP_st8-9	2015-08-06	Profiler (radius=10, n=0) : grkGFP_st8-9_0073.tab.txt	9	1	424	NA	83	0.917	85	0.942	0.976471	84	NA
MS2/MCP	grkGFP_st8-9	2015-08-06	Profiler (radius=10, n=0) : grkGFP_st8-9_0073.tab.txt	9	1	452	NA	58	0.815	73	0.879	0.794521	65.5	NA
MS2/MCP	grkGFP_st8-9	2015-08-06	Profiler (radius=10, n=0) : grkGFP_st8-9_0073.tab.txt	9	1	462	NA	105	0.897	64	0.839	1.64062	84.5	NA
MS2/MCP	grkGFP_st8-9	2015-08-06	Profiler (radius=10, n=0) : grkGFP_st8-9_0073.tab.txt	9	1	502	NA	64	0.876	88	0.973	0.727273	76	NA
MS2/MCP	grkGFP_st8-9	2015-08-06	Profiler (radius=10, n=0) : grkGFP_st8-9_0073.tab.txt	9	1	518	NA	105	0.974	128	0.906	0.820312	116.5	NA
MS2/MCP	grkGFP_st8-9	2015-08-06	Profiler (radius=10, n=0) : grkGFP_st8-9_0081.tab.txt	10	1	3	NA	180	0.879	111	0.947	1.62162	145.5	NA
MS2/MCP	grkGFP_st8-9	2015-08-06	Profiler (radius=10, n=0) : grkGFP_st8-9_0081.tab.txt	10	1	14	NA	81	0.821	118	0.927	0.686441	99.5	NA
MS2/MCP	grkGFP_st8-9	2015-08-06	Profiler (radius=10, n=0) : grkGFP_st8-9_0081.tab.txt	10	1	25	NA	83	0.972	162	0.938	0.512346	122.5	NA
MS2/MCP	grkGFP_st8-9	2015-08-06	Profiler (radius=10, n=0) : grkGFP_st8-9_0081.tab.txt	10	1	32	NA	83	0.927	102	0.941	0.813725	92.5	NA
MS2/MCP	grkGFP_st8-9	2015-08-06	Profiler (radius=10, n=0) : grkGFP_st8-9_0081.tab.txt	10	1	54	NA	134	0.882	220	0.917	0.609091	177	NA
MS2/MCP	grkGFP_st8-9	2015-08-06	Profiler (radius=10, n=0) : grkGFP_st8-9_0081.tab.txt	10	1	65	NA	97	0.925	84	0.967	1.15476	90.5	NA
MS2/MCP	grkGFP_st8-9	2015-08-06	Profiler (radius=10, n=0) : grkGFP_st8-9_0081.tab.txt	10	1	76	NA	92	0.909	73	0.937	1.26027	82.5	NA
MS2/MCP	grkGFP_st8-9	2015-08-06	Profiler (radius=10, n=0) : grkGFP_st8-9_0081.tab.txt	10	1	77	NA	112	0.979	92	0.931	1.21739	102	NA
MS2/MCP	grkGFP_st8-9	2015-08-06	Profiler (radius=10, n=0) : grkGFP_st8-9_0081.tab.txt	10	1	100	NA	99	0.953	89	0.863	1.11236	94	NA
MS2/MCP	grkGFP_st8-9	2015-08-06	Profiler (radius=10, n=0) : grkGFP_st8-9_0081.tab.txt	10	1	114	NA	65	0.953	94	0.972	0.691489	79.5	NA
MS2/MCP	grkGFP_st8-9	2015-08-06	Profiler (radius=10, n=0) : grkGFP_st8-9_0081.tab.txt	10	1	137	NA	72	0.956	97	0.959	0.742268	84.5	NA
MS2/MCP	grkGFP_st8-9	2015-08-06	Profiler (radius=10, n=0) : grkGFP_st8-9_0081.tab.txt	10	1	143	NA	98	0.972	155	0.828	0.632258	126.5	NA
MS2/MCP	grkGFP_st8-9	2015-08-06	Profiler (radius=10, n=0) : grkGFP_st8-9_0081.tab.txt	10	1	146	NA	116	0.811	60	0.82	1.93333	88	NA
MS2/MCP	grkGFP_st8-9	2015-08-06	Profiler (radius=10, n=0) : grkGFP_st8-9_0081.tab.txt	10	1	149	NA	127	0.897	94	0.906	1.35106	110.5	NA
MS2/MCP	grkGFP_st8-9	2015-08-06	Profiler (radius=10, n=0) : grkGFP_st8-9_0081.tab.txt	10	1	158	NA	155	0.911	175	0.963	0.885714	165	NA
MS2/MCP	grkGFP_st8-9	2015-08-06	Profiler (radius=10, n=0) : grkGFP_st8-9_0081.tab.txt	10	1	164	NA	101	0.978	64	0.887	1.57812	82.5	NA
MS2/MCP	grkGFP_st8-9	2015-08-06	Profiler (radius=10, n=0) : grkGFP_st8-9_0081.tab.txt	10	1	197	NA	97	0.952	76	0.812	1.27632	86.5	NA
MS2/MCP	grkGFP_st8-9	2015-08-06	Profiler (radius=10, n=0) : grkGFP_st8-9_0081.tab.txt	10	1	217	NA	111	0.901	132	0.861	0.840909	121.5	NA
MS2/MCP	grkGFP_st8-9	2015-08-06	Profiler (radius=10, n=0) : grkGFP_st8-9_0081.tab.txt	10	1	218	NA	93	0.972	64	0.92	1.45312	78.5	NA
MS2/MCP	grkGFP_st8-9	2015-08-06	Profiler (radius=10, n=0) : grkGFP_st8-9_0081.tab.txt	10	1	233	NA	106	0.825	119	0.911	0.890756	112.5	NA
MS2/MCP	grkGFP_st8-9	2015-08-06	Profiler (radius=10, n=0) : grkGFP_st8-9_0081.tab.txt	10	1	235	NA	67	0.871	121	0.958	0.553719	94	NA
MS2/MCP	grkGFP_st8-9	2015-08-06	Profiler (radius=10, n=0) : grkGFP_st8-9_0081.tab.txt	10	1	237	NA	77	0.852	140	0.906	0.55	108.5	NA
MS2/MCP	grkGFP_st8-9	2015-08-06	Profiler (radius=10, n=0) : grkGFP_st8-9_0081.tab.txt	10	1	239	NA	97	0.986	111	0.844	0.873874	104	NA
MS2/MCP	grkGFP_st8-9	2015-08-06	Profiler (radius=10, n=0) : grkGFP_st8-9_0081.tab.txt	10	1	243	NA	118	0.884	84	0.958	1.40476	101	NA
MS2/MCP	grkGFP_st8-9	2015-08-06	Profiler (radius=10, n=0) : grkGFP_st8-9_0081.tab.txt	10	1	244	NA	74	0.886	124	0.89	0.596774	99	NA
MS2/MCP	grkGFP_st8-9	2015-08-06	Profiler (radius=10, n=0) : grkGFP_st8-9_0081.tab.txt	10	1	248	NA	98	0.892	113	0.971	0.867257	105.5	NA
MS2/MCP	grkGFP_st8-9	2015-08-06	Profiler (radius=10, n=0) : grkGFP_st8-9_0081.tab.txt	10	1	259	NA	88	0.917	95	0.849	0.926316	91.5	NA
MS2/MCP	grkGFP_st8-9	2015-08-06	Profiler (radius=10, n=0) : grkGFP_st8-9_0081.tab.txt	10	1	260	NA	141	0.951	83	0.944	1.6988	112	NA
MS2/MCP	grkGFP_st8-9	2015-08-06	Profiler (radius=10, n=0) : grkGFP_st8-9_0081.tab.txt	10	1	262	NA	74	0.971	72	0.822	1.02778	73	NA
MS2/MCP	grkGFP_st8-9	2015-08-06	Profiler (radius=10, n=0) : grkGFP_st8-9_0081.tab.txt	10	1	294	NA	100	0.897	72	0.828	1.38889	86	NA
MS2/MCP	grkGFP_st8-9	2015-08-06	Profiler (radius=10, n=0) : grkGFP_st8-9_0081.tab.txt	10	1	302	NA	96	0.928	82	0.96	1.17073	89	NA
MS2/MCP	grkGFP_st8-9	2015-08-06	Profiler (radius=10, n=0) : grkGFP_st8-9_0081.tab.txt	10	1	329	NA	75	0.933	113	0.949	0.663717	94	NA
MS2/MCP	grkGFP_st8-9	2015-08-06	Profiler (radius=10, n=0) : grkGFP_st8-9_0081.tab.txt	10	1	333	NA	119	0.949	92	0.889	1.29348	105.5	NA
MS2/MCP	grkGFP_st8-9	2015-08-06	Profiler (radius=10, n=0) : grkGFP_st8-9_0081.tab.txt	10	1	342	NA	58	0.849	94	0.831	0.617021	76	NA
MS2/MCP	grkGFP_st8-9	2015-08-06	Profiler (radius=10, n=0) : grkGFP_st8-9_0081.tab.txt	10	1	344	NA	61	0.901	77	0.929	0.792208	69	NA
MS2/MCP	grkGFP_st8-9	2015-08-06	Profiler (radius=10, n=0) : grkGFP_st8-9_0081.tab.txt	10	1	363	NA	106	0.878	107	0.821	0.990654	106.5	NA
MS2/MCP	grkGFP_st8-9	2015-08-06	Profiler (radius=10, n=0) : grkGFP_st8-9_0081.tab.txt	10	1	403	NA	75	0.899	81	0.977	0.925926	78	NA
MS2/MCP	grkGFP_st8-9	2015-08-06	Profiler (radius=10, n=0) : grkGFP_st8-9_0081.tab.txt	10	1	411	NA	178	0.869	93	0.883	1.91398	135.5	NA
MS2/MCP	grkGFP_st8-9	2015-08-06	Profiler (radius=10, n=0) : grkGFP_st8-9_0081.tab.txt	10	1	439	NA	91	0.89	93	0.847	0.978495	92	NA
MS2/MCP	grkGFP_st8-9	2015-08-06	Profiler (radius=10, n=0) : grkGFP_st8-9_0081.tab.txt	10	1	448	NA	98	0.937	82	0.81	1.19512	90	NA
MS2/MCP	grkGFP_st8-9	2015-08-06	Profiler (radius=10, n=0) : grkGFP_st8-9_0081.tab.txt	10	1	467	NA	51	0.86	69	0.931	0.73913	60	NA
MS2/MCP	grkGFP_st8-9	2015-08-06	Profiler (radius=10, n=0) : grkGFP_st8-9_0081.tab.txt	10	1	482	NA	107	0.89	83	0.98	1.28916	95	NA
MS2/MCP	grkGFP_st8-9	2015-08-06	Profiler (radius=10, n=0) : grkGFP_st8-9_0081.tab.txt	10	1	570	NA	80	0.969	112	0.931	0.714286	96	NA
MS2/MCP	grkGFP_st8-9	2015-08-06	Profiler (radius=10, n=0) : grkGFP_st8-9_0085.tab.txt	10	2	4	NA	118	0.983	110	0.918	1.07273	114	NA
MS2/MCP	grkGFP_st8-9	2015-08-06	Profiler (radius=10, n=0) : grkGFP_st8-9_0085.tab.txt	10	2	5	NA	109	0.879	95	0.995	1.14737	102	NA
MS2/MCP	grkGFP_st8-9	2015-08-06	Profiler (radius=10, n=0) : grkGFP_st8-9_0085.tab.txt	10	2	20	NA	96	0.948	83	0.948	1.15663	89.5	NA
MS2/MCP	grkGFP_st8-9	2015-08-06	Profiler (radius=10, n=0) : grkGFP_st8-9_0085.tab.txt	10	2	41	NA	138	0.839	77	0.958	1.79221	107.5	NA
MS2/MCP	grkGFP_st8-9	2015-08-06	Profiler (radius=10, n=0) : grkGFP_st8-9_0085.tab.txt	10	2	50	NA	181	0.957	199	0.928	0.909548	190	NA
MS2/MCP	grkGFP_st8-9	2015-08-06	Profiler (radius=10, n=0) : grkGFP_st8-9_0085.tab.txt	10	2	51	NA	87	0.851	128	0.837	0.679688	107.5	NA
MS2/MCP	grkGFP_st8-9	2015-08-06	Profiler (radius=10, n=0) : grkGFP_st8-9_0085.tab.txt	10	2	64	NA	115	0.912	138	0.908	0.833333	126.5	NA
MS2/MCP	grkGFP_st8-9	2015-08-06	Profiler (radius=10, n=0) : grkGFP_st8-9_0085.tab.txt	10	2	70	NA	109	0.957	99	0.897	1.10101	104	NA
MS2/MCP	grkGFP_st8-9	2015-08-06	Profiler (radius=10, n=0) : grkGFP_st8-9_0085.tab.txt	10	2	74	NA	176	0.954	215	0.932	0.818605	195.5	NA
MS2/MCP	grkGFP_st8-9	2015-08-06	Profiler (radius=10, n=0) : grkGFP_st8-9_0085.tab.txt	10	2	77	NA	87	0.812	81	0.899	1.07407	84	NA
MS2/MCP	grkGFP_st8-9	2015-08-06	Profiler (radius=10, n=0) : grkGFP_st8-9_0085.tab.txt	10	2	88	NA	83	0.939	109	0.833	0.761468	96	NA
MS2/MCP	grkGFP_st8-9	2015-08-06	Profiler (radius=10, n=0) : grkGFP_st8-9_0085.tab.txt	10	2	92	NA	129	0.866	247	0.833	0.522267	188	NA
MS2/MCP	grkGFP_st8-9	2015-08-06	Profiler (radius=10, n=0) : grkGFP_st8-9_0085.tab.txt	10	2	95	NA	88	0.835	98	0.94	0.897959	93	NA
MS2/MCP	grkGFP_st8-9	2015-08-06	Profiler (radius=10, n=0) : grkGFP_st8-9_0085.tab.txt	10	2	97	NA	66	0.922	68	0.862	0.970588	67	NA
MS2/MCP	grkGFP_st8-9	2015-08-06	Profiler (radius=10, n=0) : grkGFP_st8-9_0085.tab.txt	10	2	106	NA	90	0.903	55	0.887	1.63636	72.5	NA
MS2/MCP	grkGFP_st8-9	2015-08-06	Profiler (radius=10, n=0) : grkGFP_st8-9_0085.tab.txt	10	2	135	NA	119	0.932	76	0.966	1.56579	97.5	NA
MS2/MCP	grkGFP_st8-9	2015-08-06	Profiler (radius=10, n=0) : grkGFP_st8-9_0085.tab.txt	10	2	140	NA	68	0.903	86	0.938	0.790698	77	NA
MS2/MCP	grkGFP_st8-9	2015-08-06	Profiler (radius=10, n=0) : grkGFP_st8-9_0085.tab.txt	10	2	173	NA	156	0.941	100	0.921	1.56	128	NA
MS2/MCP	grkGFP_st8-9	2015-08-06	Profiler (radius=10, n=0) : grkGFP_st8-9_0085.tab.txt	10	2	182	NA	118	0.94	99	0.875	1.19192	108.5	NA
MS2/MCP	grkGFP_st8-9	2015-08-06	Profiler (radius=10, n=0) : grkGFP_st8-9_0085.tab.txt	10	2	247	NA	98	0.808	73	0.918	1.34247	85.5	NA
MS2/MCP	grkGFP_st8-9	2015-08-06	Profiler (radius=10, n=0) : grkGFP_st8-9_0085.tab.txt	10	2	297	NA	51	0.894	66	0.912	0.772727	58.5	NA
MS2/MCP	grkGFP_st8-9	2015-08-06	Profiler (radius=10, n=0) : grkGFP_st8-9_0088.tab.txt	11	1	1	NA	69	0.836	92	0.923	0.75	80.5	NA
MS2/MCP	grkGFP_st8-9	2015-08-06	Profiler (radius=10, n=0) : grkGFP_st8-9_0088.tab.txt	11	1	11	NA	96	0.982	118	0.874	0.813559	107	NA
MS2/MCP	grkGFP_st8-9	2015-08-06	Profiler (radius=10, n=0) : grkGFP_st8-9_0088.tab.txt	11	1	40	NA	74	0.882	101	0.861	0.732673	87.5	NA
MS2/MCP	grkGFP_st8-9	2015-08-06	Profiler (radius=10, n=0) : grkGFP_st8-9_0088.tab.txt	11	1	49	NA	58	0.937	96	0.831	0.604167	77	NA
MS2/MCP	grkGFP_st8-9	2015-08-06	Profiler (radius=10, n=0) : grkGFP_st8-9_0088.tab.txt	11	1	52	NA	135	0.897	86	0.922	1.56977	110.5	NA
MS2/MCP	grkGFP_st8-9	2015-08-06	Profiler (radius=10, n=0) : grkGFP_st8-9_0088.tab.txt	11	1	53	NA	80	0.915	87	0.828	0.91954	83.5	NA
MS2/MCP	grkGFP_st8-9	2015-08-06	Profiler (radius=10, n=0) : grkGFP_st8-9_0088.tab.txt	11	1	54	NA	88	0.949	131	0.957	0.671756	109.5	NA
MS2/MCP	grkGFP_st8-9	2015-08-06	Profiler (radius=10, n=0) : grkGFP_st8-9_0088.tab.txt	11	1	55	NA	99	0.904	69	0.968	1.43478	84	NA
MS2/MCP	grkGFP_st8-9	2015-08-06	Profiler (radius=10, n=0) : grkGFP_st8-9_0088.tab.txt	11	1	60	NA	80	0.972	159	0.904	0.503145	119.5	NA
MS2/MCP	grkGFP_st8-9	2015-08-06	Profiler (radius=10, n=0) : grkGFP_st8-9_0088.tab.txt	11	1	63	NA	72	0.985	91	0.92	0.791209	81.5	NA
MS2/MCP	grkGFP_st8-9	2015-08-06	Profiler (radius=10, n=0) : grkGFP_st8-9_0088.tab.txt	11	1	81	NA	69	0.873	85	0.979	0.811765	77	NA
MS2/MCP	grkGFP_st8-9	2015-08-06	Profiler (radius=10, n=0) : grkGFP_st8-9_0088.tab.txt	11	1	83	NA	56	0.833	105	0.923	0.533333	80.5	NA
MS2/MCP	grkGFP_st8-9	2015-08-06	Profiler (radius=10, n=0) : grkGFP_st8-9_0088.tab.txt	11	1	84	NA	109	0.91	97	0.902	1.12371	103	NA
MS2/MCP	grkGFP_st8-9	2015-08-06	Profiler (radius=10, n=0) : grkGFP_st8-9_0088.tab.txt	11	1	104	NA	116	0.9	121	0.981	0.958678	118.5	NA
MS2/MCP	grkGFP_st8-9	2015-08-06	Profiler (radius=10, n=0) : grkGFP_st8-9_0088.tab.txt	11	1	128	NA	65	0.884	110	0.826	0.590909	87.5	NA
MS2/MCP	grkGFP_st8-9	2015-08-06	Profiler (radius=10, n=0) : grkGFP_st8-9_0088.tab.txt	11	1	137	NA	101	0.962	127	0.934	0.795276	114	NA
MS2/MCP	grkGFP_st8-9	2015-08-06	Profiler (radius=10, n=0) : grkGFP_st8-9_0088.tab.txt	11	1	140	NA	70	0.908	73	0.949	0.958904	71.5	NA
MS2/MCP	grkGFP_st8-9	2015-08-06	Profiler (radius=10, n=0) : grkGFP_st8-9_0088.tab.txt	11	1	147	NA	126	0.911	102	0.967	1.23529	114	NA
MS2/MCP	grkGFP_st8-9	2015-08-06	Profiler (radius=10, n=0) : grkGFP_st8-9_0088.tab.txt	11	1	150	NA	95	0.876	102	0.849	0.931373	98.5	NA
MS2/MCP	grkGFP_st8-9	2015-08-06	Profiler (radius=10, n=0) : grkGFP_st8-9_0088.tab.txt	11	1	161	NA	88	0.947	93	0.971	0.946237	90.5	NA
MS2/MCP	grkGFP_st8-9	2015-08-06	Profiler (radius=10, n=0) : grkGFP_st8-9_0088.tab.txt	11	1	175	NA	60	0.857	76	0.898	0.789474	68	NA
MS2/MCP	grkGFP_st8-9	2015-08-06	Profiler (radius=10, n=0) : grkGFP_st8-9_0088.tab.txt	11	1	185	NA	79	0.952	68	0.876	1.16176	73.5	NA
MS2/MCP	grkGFP_st8-9	2015-08-06	Profiler (radius=10, n=0) : grkGFP_st8-9_0088.tab.txt	11	1	187	NA	109	0.921	90	0.891	1.21111	99.5	NA
MS2/MCP	grkGFP_st8-9	2015-08-06	Profiler (radius=10, n=0) : grkGFP_st8-9_0088.tab.txt	11	1	201	NA	78	0.9	81	0.803	0.962963	79.5	NA
MS2/MCP	grkGFP_st8-9	2015-08-06	Profiler (radius=10, n=0) : grkGFP_st8-9_0088.tab.txt	11	1	242	NA	75	0.971	69	0.878	1.08696	72	NA
MS2/MCP	grkGFP_st8-9	2015-08-06	Profiler (radius=10, n=0) : grkGFP_st8-9_0088.tab.txt	11	1	254	NA	104	0.805	87	0.908	1.1954	95.5	NA
MS2/MCP	grkGFP_st8-9	2015-08-06	Profiler (radius=10, n=0) : grkGFP_st8-9_0088.tab.txt	11	1	272	NA	79	0.845	79	0.873	1	79	NA
MS2/MCP	grkGFP_st8-9	2015-08-06	Profiler (radius=10, n=0) : grkGFP_st8-9_0088.tab.txt	11	1	287	NA	103	0.911	173	0.887	0.595376	138	NA
MS2/MCP	grkGFP_st8-9	2015-08-06	Profiler (radius=10, n=0) : grkGFP_st8-9_0088.tab.txt	11	1	298	NA	110	0.926	105	0.83	1.04762	107.5	NA
MS2/MCP	grkGFP_st8-9	2015-08-06	Profiler (radius=10, n=0) : grkGFP_st8-9_0088.tab.txt	11	1	315	NA	64	0.876	77	0.936	0.831169	70.5	NA
MS2/MCP	grkGFP_st8-9	2015-08-06	Profiler (radius=10, n=0) : grkGFP_st8-9_0088.tab.txt	11	1	332	NA	71	0.846	116	0.93	0.612069	93.5	NA
MS2/MCP	grkGFP_st8-9	2015-08-06	Profiler (radius=10, n=0) : grkGFP_st8-9_0088.tab.txt	11	1	351	NA	108	0.926	71	0.922	1.52113	89.5	NA
MS2/MCP	grkGFP_st8-9	2015-08-06	Profiler (radius=10, n=0) : grkGFP_st8-9_0088.tab.txt	11	1	362	NA	69	0.8	73	0.928	0.945205	71	NA
MS2/MCP	grkGFP_st8-9	2015-08-06	Profiler (radius=10, n=0) : grkGFP_st8-9_0088.tab.txt	11	1	399	NA	145	0.873	130	0.928	1.11538	137.5	NA
MS2/MCP	grkGFP_st8-9	2015-08-06	Profiler (radius=10, n=0) : grkGFP_st8-9_0092.tab.txt	11	2	4	NA	103	0.972	66	0.906	1.56061	84.5	NA
MS2/MCP	grkGFP_st8-9	2015-08-06	Profiler (radius=10, n=0) : grkGFP_st8-9_0092.tab.txt	11	2	14	NA	113	0.94	87	0.924	1.29885	100	NA
MS2/MCP	grkGFP_st8-9	2015-08-06	Profiler (radius=10, n=0) : grkGFP_st8-9_0092.tab.txt	11	2	25	NA	119	0.919	90	0.913	1.32222	104.5	NA
MS2/MCP	grkGFP_st8-9	2015-08-06	Profiler (radius=10, n=0) : grkGFP_st8-9_0092.tab.txt	11	2	26	NA	156	0.86	95	0.968	1.64211	125.5	NA
MS2/MCP	grkGFP_st8-9	2015-08-06	Profiler (radius=10, n=0) : grkGFP_st8-9_0092.tab.txt	11	2	38	NA	87	0.911	150	0.949	0.58	118.5	NA
MS2/MCP	grkGFP_st8-9	2015-08-06	Profiler (radius=10, n=0) : grkGFP_st8-9_0092.tab.txt	11	2	54	NA	95	0.942	98	0.848	0.969388	96.5	NA
MS2/MCP	grkGFP_st8-9	2015-08-06	Profiler (radius=10, n=0) : grkGFP_st8-9_0092.tab.txt	11	2	67	NA	79	0.822	104	0.928	0.759615	91.5	NA
MS2/MCP	grkGFP_st8-9	2015-08-06	Profiler (radius=10, n=0) : grkGFP_st8-9_0092.tab.txt	11	2	80	NA	103	0.966	131	0.93	0.78626	117	NA
MS2/MCP	grkGFP_st8-9	2015-08-06	Profiler (radius=10, n=0) : grkGFP_st8-9_0092.tab.txt	11	2	92	NA	98	0.918	141	0.857	0.695035	119.5	NA
MS2/MCP	grkGFP_st8-9	2015-08-06	Profiler (radius=10, n=0) : grkGFP_st8-9_0096.tab.txt	x3	1	0	NA	67	0.918	101	0.926	0.663366	84	NA
MS2/MCP	grkGFP_st8-9	2015-08-06	Profiler (radius=10, n=0) : grkGFP_st8-9_0096.tab.txt	x3	1	1	NA	101	0.971	101	0.876	1	101	NA
MS2/MCP	grkGFP_st8-9	2015-08-06	Profiler (radius=10, n=0) : grkGFP_st8-9_0096.tab.txt	x3	1	6	NA	77	0.963	73	0.81	1.05479	75	NA
MS2/MCP	grkGFP_st8-9	2015-08-06	Profiler (radius=10, n=0) : grkGFP_st8-9_0096.tab.txt	x3	1	7	NA	142	0.903	95	0.943	1.49474	118.5	NA
MS2/MCP	grkGFP_st8-9	2015-08-06	Profiler (radius=10, n=0) : grkGFP_st8-9_0096.tab.txt	x3	1	11	NA	85	0.829	117	0.942	0.726496	101	NA
MS2/MCP	grkGFP_st8-9	2015-08-06	Profiler (radius=10, n=0) : grkGFP_st8-9_0096.tab.txt	x3	1	12	NA	84	0.941	143	0.947	0.587413	113.5	NA
MS2/MCP	grkGFP_st8-9	2015-08-06	Profiler (radius=10, n=0) : grkGFP_st8-9_0096.tab.txt	x3	1	13	NA	105	0.885	134	0.933	0.783582	119.5	NA
MS2/MCP	grkGFP_st8-9	2015-08-06	Profiler (radius=10, n=0) : grkGFP_st8-9_0096.tab.txt	x3	1	18	NA	89	0.826	83	0.981	1.07229	86	NA
MS2/MCP	grkGFP_st8-9	2015-08-06	Profiler (radius=10, n=0) : grkGFP_st8-9_0096.tab.txt	x3	1	19	NA	94	0.959	70	0.911	1.34286	82	NA
MS2/MCP	grkGFP_st8-9	2015-08-06	Profiler (radius=10, n=0) : grkGFP_st8-9_0096.tab.txt	x3	1	21	NA	117	0.918	77	0.965	1.51948	97	NA
MS2/MCP	grkGFP_st8-9	2015-08-06	Profiler (radius=10, n=0) : grkGFP_st8-9_0096.tab.txt	x3	1	24	NA	77	0.953	74	0.867	1.04054	75.5	NA
MS2/MCP	grkGFP_st8-9	2015-08-06	Profiler (radius=10, n=0) : grkGFP_st8-9_0096.tab.txt	x3	1	28	NA	70	0.867	74	0.908	0.945946	72	NA
MS2/MCP	grkGFP_st8-9	2015-08-06	Profiler (radius=10, n=0) : grkGFP_st8-9_0096.tab.txt	x3	1	37	NA	101	0.852	152	0.924	0.664474	126.5	NA
MS2/MCP	grkGFP_st8-9	2015-08-06	Profiler (radius=10, n=0) : grkGFP_st8-9_0096.tab.txt	x3	1	58	NA	67	0.878	121	0.974	0.553719	94	NA
MS2/MCP	grkGFP_st8-9	2015-08-06	Profiler (radius=10, n=0) : grkGFP_st8-9_0096.tab.txt	x3	1	60	NA	112	0.834	56	0.804	2	84	NA
MS2/MCP	grkGFP_st8-9	2015-08-06	Profiler (radius=10, n=0) : grkGFP_st8-9_0096.tab.txt	x3	1	80	NA	71	0.943	99	0.842	0.717172	85	NA
MS2/MCP	grkGFP_st8-9	2015-08-06	Profiler (radius=10, n=0) : grkGFP_st8-9_0096.tab.txt	x3	1	89	NA	98	0.98	80	0.957	1.225	89	NA
MS2/MCP	grkGFP_st8-9	2015-08-06	Profiler (radius=10, n=0) : grkGFP_st8-9_0096.tab.txt	x3	1	98	NA	102	0.825	108	0.854	0.944444	105	NA
MS2/MCP	grkGFP_st8-9	2015-08-06	Profiler (radius=10, n=0) : grkGFP_st8-9_0096.tab.txt	x3	1	100	NA	70	0.944	94	0.933	0.744681	82	NA
MS2/MCP	grkGFP_st8-9	2015-08-06	Profiler (radius=10, n=0) : grkGFP_st8-9_0096.tab.txt	x3	1	101	NA	63	0.827	106	0.95	0.59434	84.5	NA
MS2/MCP	grkGFP_st8-9	2015-08-06	Profiler (radius=10, n=0) : grkGFP_st8-9_0096.tab.txt	x3	1	126	NA	86	0.977	81	0.972	1.06173	83.5	NA
MS2/MCP	grkGFP_st8-9	2015-08-06	Profiler (radius=10, n=0) : grkGFP_st8-9_0096.tab.txt	x3	1	150	NA	66	0.81	111	0.803	0.594595	88.5	NA
MS2/MCP	grkGFP_st8-9	2015-08-06	Profiler (radius=10, n=0) : grkGFP_st8-9_0096.tab.txt	x3	1	158	NA	122	0.855	76	0.961	1.60526	99	NA
MS2/MCP	grkGFP_st8-9	2015-08-06	Profiler (radius=10, n=0) : grkGFP_st8-9_0096.tab.txt	x3	1	179	NA	80	0.969	97	0.899	0.824742	88.5	NA
MS2/MCP	grkGFP_st8-9	2015-08-06	Profiler (radius=10, n=0) : grkGFP_st8-9_0096.tab.txt	x3	1	187	NA	66	0.852	65	0.943	1.01538	65.5	NA
MS2/MCP	htsGFP_st9	2015-07-30	Profiler (radius=10, n=0) : htsGFP_st9_0014.tab.txt	3	1	1	3.309	63	0.9	91	0.853	0.692308	77	NA
MS2/MCP	htsGFP_st9	2015-07-30	Profiler (radius=10, n=0) : htsGFP_st9_0014.tab.txt	3	1	6	1.882	83	0.892	82	0.87	1.0122	82.5	NA
MS2/MCP	htsGFP_st9	2015-07-30	Profiler (radius=10, n=0) : htsGFP_st9_0014.tab.txt	3	1	11	0.406	101	0.897	90	0.939	1.12222	95.5	NA
MS2/MCP	htsGFP_st9	2015-07-30	Profiler (radius=10, n=0) : htsGFP_st9_0014.tab.txt	3	1	15	3.019	107	0.941	89	0.961	1.20225	98	NA
MS2/MCP	htsGFP_st9	2015-07-30	Profiler (radius=10, n=0) : htsGFP_st9_0014.tab.txt	3	1	26	1.804	69	0.886	48	0.865	1.4375	58.5	NA
MS2/MCP	htsGFP_st9	2015-07-30	Profiler (radius=10, n=0) : htsGFP_st9_0014.tab.txt	3	1	36	1.584	86	0.928	68	0.871	1.26471	77	NA
MS2/MCP	htsGFP_st9	2015-07-30	Profiler (radius=10, n=0) : htsGFP_st9_0014.tab.txt	3	1	47	3.464	87	0.82	75	0.885	1.16	81	NA
MS2/MCP	htsGFP_st9	2015-07-30	Profiler (radius=10, n=0) : htsGFP_st9_0014.tab.txt	3	1	48	5.638	78	0.934	109	0.937	0.715596	93.5	NA
MS2/MCP	htsGFP_st9	2015-07-30	Profiler (radius=10, n=0) : htsGFP_st9_0014.tab.txt	3	1	55	1.647	68	0.844	89	0.884	0.764045	78.5	NA
MS2/MCP	htsGFP_st9	2015-07-30	Profiler (radius=10, n=0) : htsGFP_st9_0014.tab.txt	3	1	67	4.447	111	0.932	80	0.974	1.3875	95.5	NA
MS2/MCP	htsGFP_st9	2015-07-30	Profiler (radius=10, n=0) : htsGFP_st9_0014.tab.txt	3	1	74	6.672	73	0.952	72	0.848	1.01389	72.5	NA
MS2/MCP	htsGFP_st9	2015-07-30	Profiler (radius=10, n=0) : htsGFP_st9_0014.tab.txt	3	1	77	0.49	52	0.906	45	0.847	1.15556	48.5	NA
MS2/MCP	htsGFP_st9	2015-07-30	Profiler (radius=10, n=0) : htsGFP_st9_0014.tab.txt	3	1	78	5.526	96	0.916	135	0.915	0.711111	115.5	NA
MS2/MCP	htsGFP_st9	2015-07-30	Profiler (radius=10, n=0) : htsGFP_st9_0014.tab.txt	3	1	99	5.124	88	0.893	51	0.836	1.72549	69.5	NA
MS2/MCP	htsGFP_st9	2015-07-30	Profiler (radius=10, n=0) : htsGFP_st9_0017.tab.txt	3	2	2	0.845	85	0.96	83	0.879	1.0241	84	NA
MS2/MCP	htsGFP_st9	2015-07-30	Profiler (radius=10, n=0) : htsGFP_st9_0017.tab.txt	3	2	32	1.85	73	0.857	57	0.879	1.2807	65	NA
MS2/MCP	htsGFP_st9	2015-07-30	Profiler (radius=10, n=0) : htsGFP_st9_0017.tab.txt	3	2	36	0.314	127	0.934	64	0.895	1.98438	95.5	NA
MS2/MCP	htsGFP_st9	2015-07-30	Profiler (radius=10, n=0) : htsGFP_st9_0017.tab.txt	3	2	76	1.742	55	0.928	82	0.942	0.670732	68.5	NA
MS2/MCP	htsGFP_st9	2015-07-30	Profiler (radius=10, n=0) : htsGFP_st9_0017.tab.txt	3	2	97	4.983	99	0.822	51	0.867	1.94118	75	NA
MS2/MCP	htsGFP_st9	2015-07-30	Profiler (radius=10, n=0) : htsGFP_st9_0017.tab.txt	3	2	121	6.645	108	0.94	150	0.83	0.72	129	NA
MS2/MCP	htsGFP_st9	2015-07-30	Profiler (radius=10, n=0) : htsGFP_st9_0017.tab.txt	3	2	158	0.587	60	0.96	110	0.871	0.545455	85	NA
MS2/MCP	htsGFP_st9	2015-07-30	Profiler (radius=10, n=0) : htsGFP_st9_0017.tab.txt	3	2	181	8.001	68	0.856	60	0.908	1.13333	64	NA
MS2/MCP	htsGFP_st9	2015-07-30	Profiler (radius=10, n=0) : htsGFP_st9_0017.tab.txt	3	2	216	8.204	92	0.919	60	0.914	1.53333	76	NA
MS2/MCP	htsGFP_st9	2015-07-30	Profiler (radius=10, n=0) : htsGFP_st9_0017.tab.txt	3	2	218	2.203	112	0.835	66	0.88	1.69697	89	NA
MS2/MCP	htsGFP_st9	2015-07-30	Profiler (radius=10, n=0) : htsGFP_st9_0017.tab.txt	3	2	222	4.77	87	0.8	69	0.941	1.26087	78	NA
MS2/MCP	htsGFP_st9	2015-07-30	Profiler (radius=10, n=0) : htsGFP_st9_0017.tab.txt	3	2	227	6.868	67	0.885	101	0.882	0.663366	84	NA
MS2/MCP	htsGFP_st9	2015-07-30	Profiler (radius=10, n=0) : htsGFP_st9_0017.tab.txt	3	2	230	6.486	111	0.924	88	0.894	1.26136	99.5	NA
MS2/MCP	htsGFP_st9	2015-07-30	Profiler (radius=10, n=0) : htsGFP_st9_0017.tab.txt	3	2	253	0.712	67	0.937	121	0.946	0.553719	94	NA
MS2/MCP	htsGFP_st9	2015-07-30	Profiler (radius=10, n=0) : htsGFP_st9_0017.tab.txt	3	2	254	0.253	55	0.847	84	0.92	0.654762	69.5	NA
MS2/MCP	htsGFP_st9	2015-07-30	Profiler (radius=10, n=0) : htsGFP_st9_0017.tab.txt	3	2	300	7.241	74	0.904	67	0.862	1.10448	70.5	NA
MS2/MCP	htsGFP_st9	2015-07-30	Profiler (radius=10, n=0) : htsGFP_st9_0017.tab.txt	3	2	301	9.738	104	0.835	72	0.81	1.44444	88	NA
MS2/MCP	htsGFP_st9	2015-07-30	Profiler (radius=10, n=0) : htsGFP_st9_0017.tab.txt	3	2	309	9.008	76	0.824	99	0.839	0.767677	87.5	NA
MS2/MCP	htsGFP_st9	2015-07-30	Profiler (radius=10, n=0) : htsGFP_st9_0017.tab.txt	3	2	310	6.639	61	0.952	62	0.851	0.983871	61.5	NA
MS2/MCP	htsGFP_st9	2015-07-30	Profiler (radius=10, n=0) : htsGFP_st9_0017.tab.txt	3	2	312	11.17	136	0.952	73	0.943	1.86301	104.5	NA
MS2/MCP	htsGFP_st9	2015-07-30	Profiler (radius=10, n=0) : htsGFP_st9_0017.tab.txt	3	2	315	8.669	56	0.86	80	0.896	0.7	68	NA
MS2/MCP	htsGFP_st9	2015-07-30	Profiler (radius=10, n=0) : htsGFP_st9_0017.tab.txt	3	2	316	7.077	65	0.961	87	0.809	0.747126	76	NA
MS2/MCP	htsGFP_st9	2015-07-30	Profiler (radius=10, n=0) : htsGFP_st9_0017.tab.txt	3	2	318	7.717	55	0.869	79	0.882	0.696203	67	NA
MS2/MCP	htsGFP_st9	2015-07-30	Profiler (radius=10, n=0) : htsGFP_st9_0017.tab.txt	3	2	331	9.331	88	0.966	53	0.916	1.66038	70.5	NA
MS2/MCP	htsGFP_st9	2015-07-30	Profiler (radius=10, n=0) : htsGFP_st9_0017.tab.txt	3	2	332	10.741	66	0.839	51	0.906	1.29412	58.5	NA
MS2/MCP	htsGFP_st9	2015-07-30	Profiler (radius=10, n=0) : htsGFP_st9_0017.tab.txt	3	2	335	11.303	50	0.854	55	0.86	0.909091	52.5	NA
MS2/MCP	htsGFP_st9	2015-07-30	Profiler (radius=10, n=0) : htsGFP_st9_0022.tab.txt	3	3	1	4.172	87	0.959	75	0.92	1.16	81	NA
MS2/MCP	htsGFP_st9	2015-07-30	Profiler (radius=10, n=0) : htsGFP_st9_0022.tab.txt	3	3	6	2.452	66	0.9	89	0.896	0.741573	77.5	NA
MS2/MCP	htsGFP_st9	2015-07-30	Profiler (radius=10, n=0) : htsGFP_st9_0022.tab.txt	3	3	8	2.415	94	0.957	115	0.866	0.817391	104.5	NA
MS2/MCP	htsGFP_st9	2015-07-30	Profiler (radius=10, n=0) : htsGFP_st9_0022.tab.txt	3	3	14	1.612	59	0.916	95	0.886	0.621053	77	NA
MS2/MCP	htsGFP_st9	2015-07-30	Profiler (radius=10, n=0) : htsGFP_st9_0022.tab.txt	3	3	18	1.558	88	0.836	73	0.975	1.20548	80.5	NA
MS2/MCP	htsGFP_st9	2015-07-30	Profiler (radius=10, n=0) : htsGFP_st9_0022.tab.txt	3	3	30	5.602	64	0.824	47	0.892	1.3617	55.5	NA
MS2/MCP	htsGFP_st9	2015-07-30	Profiler (radius=10, n=0) : htsGFP_st9_0022.tab.txt	3	3	36	4.915	67	0.916	72	0.909	0.930556	69.5	NA
MS2/MCP	htsGFP_st9	2015-07-30	Profiler (radius=10, n=0) : htsGFP_st9_0022.tab.txt	3	3	41	5.156	62	0.938	65	0.943	0.953846	63.5	NA
MS2/MCP	htsGFP_st9	2015-07-30	Profiler (radius=10, n=0) : htsGFP_st9_0022.tab.txt	3	3	58	4.293	106	0.843	102	0.972	1.03922	104	NA
MS2/MCP	htsGFP_st9	2015-07-30	Profiler (radius=10, n=0) : htsGFP_st9_0022.tab.txt	3	3	59	3.137	49	0.8	60	0.943	0.816667	54.5	NA
MS2/MCP	htsGFP_st9	2015-07-30	Profiler (radius=10, n=0) : htsGFP_st9_0022.tab.txt	3	3	60	6.535	64	0.975	77	0.941	0.831169	70.5	NA
MS2/MCP	htsGFP_st9	2015-07-30	Profiler (radius=10, n=0) : htsGFP_st9_0022.tab.txt	3	3	62	0.844	61	0.868	64	0.953	0.953125	62.5	NA
MS2/MCP	htsGFP_st9	2015-07-30	Profiler (radius=10, n=0) : htsGFP_st9_0022.tab.txt	3	3	74	1.861	139	0.938	70	0.886	1.98571	104.5	NA
MS2/MCP	htsGFP_st9	2015-07-30	Profiler (radius=10, n=0) : htsGFP_st9_0022.tab.txt	3	3	79	5.22	68	0.809	46	0.823	1.47826	57	NA
MS2/MCP	htsGFP_st9	2015-07-30	Profiler (radius=10, n=0) : htsGFP_st9_0022.tab.txt	3	3	81	3.488	99	0.885	68	0.949	1.45588	83.5	NA
MS2/MCP	htsGFP_st9	2015-07-30	Profiler (radius=10, n=0) : htsGFP_st9_0022.tab.txt	3	3	86	1.447	56	0.877	78	0.934	0.717949	67	NA
MS2/MCP	htsGFP_st9	2015-07-30	Profiler (radius=10, n=0) : htsGFP_st9_0022.tab.txt	3	3	104	2.222	51	0.933	73	0.869	0.69863	62	NA
MS2/MCP	htsGFP_st9	2015-07-30	Profiler (radius=10, n=0) : htsGFP_st9_0022.tab.txt	3	3	115	5.295	67	0.96	108	0.968	0.62037	87.5	NA
MS2/MCP	htsGFP_st9	2015-07-30	Profiler (radius=10, n=0) : htsGFP_st9_0022.tab.txt	3	3	126	4.025	80	0.952	84	0.84	0.952381	82	NA
MS2/MCP	htsGFP_st9	2015-07-30	Profiler (radius=10, n=0) : htsGFP_st9_0022.tab.txt	3	3	129	7.667	86	0.875	116	0.899	0.741379	101	NA
MS2/MCP	htsGFP_st9	2015-07-30	Profiler (radius=10, n=0) : htsGFP_st9_0022.tab.txt	3	3	147	3.658	55	0.87	72	0.899	0.763889	63.5	NA
MS2/MCP	htsGFP_st9	2015-07-30	Profiler (radius=10, n=0) : htsGFP_st9_0022.tab.txt	3	3	149	0.401	102	0.85	144	0.832	0.708333	123	NA
MS2/MCP	htsGFP_st9	2015-07-30	Profiler (radius=10, n=0) : htsGFP_st9_0022.tab.txt	3	3	154	1.86	59	0.895	80	0.916	0.7375	69.5	NA
MS2/MCP	htsGFP_st9	2015-07-30	Profiler (radius=10, n=0) : htsGFP_st9_0022.tab.txt	3	3	175	1.394	48	0.955	60	0.884	0.8	54	NA
MS2/MCP	htsGFP_st9	2015-07-30	Profiler (radius=10, n=0) : htsGFP_st9_0022.tab.txt	3	3	178	2.998	48	0.928	68	0.947	0.705882	58	NA
MS2/MCP	htsGFP_st9	2015-07-30	Profiler (radius=10, n=0) : htsGFP_st9_0022.tab.txt	3	3	184	7.825	60	0.818	58	0.878	1.03448	59	NA
MS2/MCP	htsGFP_st9	2015-07-30	Profiler (radius=10, n=0) : htsGFP_st9_0022.tab.txt	3	3	186	8.905	92	0.863	82	0.886	1.12195	87	NA
MS2/MCP	htsGFP_st9	2015-07-30	Profiler (radius=10, n=0) : htsGFP_st9_0022.tab.txt	3	3	187	1.7	41	0.802	53	0.807	0.773585	47	NA
MS2/MCP	htsGFP_st9	2015-07-30	Profiler (radius=10, n=0) : htsGFP_st9_0022.tab.txt	3	3	189	5.233	56	0.845	59	0.89	0.949153	57.5	NA
MS2/MCP	htsGFP_st9	2015-07-30	Profiler (radius=10, n=0) : htsGFP_st9_0022.tab.txt	3	3	194	7.522	79	0.88	61	0.887	1.29508	70	NA
MS2/MCP	htsGFP_st9	2015-07-30	Profiler (radius=10, n=0) : htsGFP_st9_0022.tab.txt	3	3	199	8.783	146	0.883	82	0.945	1.78049	114	NA
MS2/MCP	htsGFP_st9	2015-07-30	Profiler (radius=10, n=0) : htsGFP_st9_0022.tab.txt	3	3	204	6.492	57	0.985	69	0.864	0.826087	63	NA
MS2/MCP	htsGFP_st9	2015-07-30	Profiler (radius=10, n=0) : htsGFP_st9_0022.tab.txt	3	3	206	11.09	48	0.823	73	0.935	0.657534	60.5	NA
MS2/MCP	htsGFP_st9	2015-07-30	Profiler (radius=10, n=0) : htsGFP_st9_0022.tab.txt	3	3	210	0.099	41	0.83	48	0.946	0.854167	44.5	NA
MS2/MCP	htsGFP_st9	2015-07-30	Profiler (radius=10, n=0) : htsGFP_st9_0024.tab.txt	4	1	15	1.758	77	0.954	71	0.97	1.08451	74	NA
MS2/MCP	htsGFP_st9	2015-07-30	Profiler (radius=10, n=0) : htsGFP_st9_0024.tab.txt	4	1	28	6.931	91	0.988	108	0.881	0.842593	99.5	NA
MS2/MCP	htsGFP_st9	2015-07-30	Profiler (radius=10, n=0) : htsGFP_st9_0024.tab.txt	4	1	32	9.72	59	0.837	59	0.904	1	59	NA
MS2/MCP	htsGFP_st9	2015-07-30	Profiler (radius=10, n=0) : htsGFP_st9_0024.tab.txt	4	1	38	5.23	80	0.983	86	0.983	0.930233	83	NA
MS2/MCP	htsGFP_st9	2015-07-30	Profiler (radius=10, n=0) : htsGFP_st9_0024.tab.txt	4	1	56	1.254	71	0.869	70	0.933	1.01429	70.5	NA
MS2/MCP	htsGFP_st9	2015-07-30	Profiler (radius=10, n=0) : htsGFP_st9_0024.tab.txt	4	1	63	5.803	88	0.94	57	0.854	1.54386	72.5	NA
MS2/MCP	htsGFP_st9	2015-07-30	Profiler (radius=10, n=0) : htsGFP_st9_0024.tab.txt	4	1	64	10.665	73	0.972	66	0.92	1.10606	69.5	NA
MS2/MCP	htsGFP_st9	2015-07-30	Profiler (radius=10, n=0) : htsGFP_st9_0024.tab.txt	4	1	76	11.238	118	0.837	84	0.9	1.40476	101	NA
MS2/MCP	htsGFP_st9	2015-07-30	Profiler (radius=10, n=0) : htsGFP_st9_0024.tab.txt	4	1	84	3.55	54	0.901	85	0.9	0.635294	69.5	NA
MS2/MCP	htsGFP_st9	2015-07-30	Profiler (radius=10, n=0) : htsGFP_st9_0024.tab.txt	4	1	89	2.805	67	0.909	58	0.912	1.15517	62.5	NA
MS2/MCP	htsGFP_st9	2015-07-30	Profiler (radius=10, n=0) : htsGFP_st9_0024.tab.txt	4	1	98	4.83	91	0.897	87	0.968	1.04598	89	NA
MS2/MCP	htsGFP_st9	2015-07-30	Profiler (radius=10, n=0) : htsGFP_st9_0024.tab.txt	4	1	100	5.835	97	0.919	53	0.91	1.83019	75	NA
MS2/MCP	htsGFP_st9	2015-07-30	Profiler (radius=10, n=0) : htsGFP_st9_0024.tab.txt	4	1	107	10.107	79	0.951	104	0.831	0.759615	91.5	NA
MS2/MCP	htsGFP_st9	2015-07-30	Profiler (radius=10, n=0) : htsGFP_st9_0024.tab.txt	4	1	111	10.663	94	0.977	71	0.979	1.32394	82.5	NA
MS2/MCP	htsGFP_st9	2015-07-30	Profiler (radius=10, n=0) : htsGFP_st9_0024.tab.txt	4	1	112	6.116	71	0.905	72	0.814	0.986111	71.5	NA
MS2/MCP	htsGFP_st9	2015-07-30	Profiler (radius=10, n=0) : htsGFP_st9_0024.tab.txt	4	1	115	6.753	53	0.951	67	0.988	0.791045	60	NA
MS2/MCP	htsGFP_st9	2015-07-30	Profiler (radius=10, n=0) : htsGFP_st9_0024.tab.txt	4	1	120	10.368	66	0.962	54	0.925	1.22222	60	NA
MS2/MCP	htsGFP_st9	2015-07-30	Profiler (radius=10, n=0) : htsGFP_st9_0024.tab.txt	4	1	123	8.899	68	0.953	75	0.926	0.906667	71.5	NA
MS2/MCP	htsGFP_st9	2015-07-30	Profiler (radius=10, n=0) : htsGFP_st9_0024.tab.txt	4	1	128	3.463	89	0.932	83	0.875	1.07229	86	NA
MS2/MCP	htsGFP_st9	2015-07-30	Profiler (radius=10, n=0) : htsGFP_st9_0024.tab.txt	4	1	131	7.38	73	0.857	72	0.868	1.01389	72.5	NA
MS2/MCP	htsGFP_st9	2015-07-30	Profiler (radius=10, n=0) : htsGFP_st9_0024.tab.txt	4	1	134	4.635	83	0.837	81	0.838	1.02469	82	NA
MS2/MCP	htsGFP_st9	2015-07-30	Profiler (radius=10, n=0) : htsGFP_st9_0024.tab.txt	4	1	151	4.1	68	0.846	57	0.921	1.19298	62.5	NA
MS2/MCP	htsGFP_st9	2015-07-30	Profiler (radius=10, n=0) : htsGFP_st9_0024.tab.txt	4	1	163	8.958	66	0.964	104	0.846	0.634615	85	NA
MS2/MCP	htsGFP_st9	2015-07-30	Profiler (radius=10, n=0) : htsGFP_st9_0024.tab.txt	4	1	167	3.763	74	0.922	63	0.946	1.1746	68.5	NA
MS2/MCP	htsGFP_st9	2015-07-30	Profiler (radius=10, n=0) : htsGFP_st9_0024.tab.txt	4	1	178	7.811	66	0.971	73	0.935	0.90411	69.5	NA
MS2/MCP	htsGFP_st9	2015-07-30	Profiler (radius=10, n=0) : htsGFP_st9_0024.tab.txt	4	1	186	6.947	71	0.959	119	0.823	0.596639	95	NA
MS2/MCP	htsGFP_st9	2015-07-30	Profiler (radius=10, n=0) : htsGFP_st9_0024.tab.txt	4	1	202	11.297	53	0.914	56	0.869	0.946429	54.5	NA
MS2/MCP	htsGFP_st9	2015-07-30	Profiler (radius=10, n=0) : htsGFP_st9_0024.tab.txt	4	1	208	9.695	79	0.907	115	0.955	0.686957	97	NA
MS2/MCP	htsGFP_st9	2015-07-30	Profiler (radius=10, n=0) : htsGFP_st9_0024.tab.txt	4	1	231	3.087	72	0.971	73	0.904	0.986301	72.5	NA
MS2/MCP	htsGFP_st9	2015-07-30	Profiler (radius=10, n=0) : htsGFP_st9_0024.tab.txt	4	1	233	5.465	103	0.924	82	0.806	1.2561	92.5	NA
MS2/MCP	htsGFP_st9	2015-07-30	Profiler (radius=10, n=0) : htsGFP_st9_0024.tab.txt	4	1	239	5.169	90	0.939	74	0.814	1.21622	82	NA
MS2/MCP	htsGFP_st9	2015-07-30	Profiler (radius=10, n=0) : htsGFP_st9_0024.tab.txt	4	1	240	11.079	58	0.86	55	0.92	1.05455	56.5	NA
MS2/MCP	htsGFP_st9	2015-07-30	Profiler (radius=10, n=0) : htsGFP_st9_0024.tab.txt	4	1	246	4.927	101	0.888	78	0.956	1.29487	89.5	NA
MS2/MCP	htsGFP_st9	2015-07-30	Profiler (radius=10, n=0) : htsGFP_st9_0024.tab.txt	4	1	256	8.992	101	0.915	64	0.962	1.57812	82.5	NA
MS2/MCP	htsGFP_st9	2015-07-30	Profiler (radius=10, n=0) : htsGFP_st9_0024.tab.txt	4	1	257	5.815	61	0.882	78	0.908	0.782051	69.5	NA
MS2/MCP	htsGFP_st9	2015-07-30	Profiler (radius=10, n=0) : htsGFP_st9_0024.tab.txt	4	1	275	9.924	72	0.966	109	0.865	0.66055	90.5	NA
MS2/MCP	htsGFP_st9	2015-07-30	Profiler (radius=10, n=0) : htsGFP_st9_0024.tab.txt	4	1	286	8.735	103	0.962	75	0.896	1.37333	89	NA
MS2/MCP	htsGFP_st9	2015-07-30	Profiler (radius=10, n=0) : htsGFP_st9_0024.tab.txt	4	1	297	9.863	110	0.894	115	0.864	0.956522	112.5	NA
MS2/MCP	htsGFP_st9	2015-07-30	Profiler (radius=10, n=0) : htsGFP_st9_0024.tab.txt	4	1	299	6.731	103	0.908	83	0.926	1.24096	93	NA
MS2/MCP	htsGFP_st9	2015-07-30	Profiler (radius=10, n=0) : htsGFP_st9_0024.tab.txt	4	1	302	5.078	114	0.911	92	0.855	1.23913	103	NA
MS2/MCP	htsGFP_st9	2015-07-30	Profiler (radius=10, n=0) : htsGFP_st9_0024.tab.txt	4	1	334	5.754	70	0.974	77	0.923	0.909091	73.5	NA
MS2/MCP	htsGFP_st9	2015-07-30	Profiler (radius=10, n=0) : htsGFP_st9_0024.tab.txt	4	1	341	3.883	81	0.963	75	0.805	1.08	78	NA
MS2/MCP	htsGFP_st9	2015-07-30	Profiler (radius=10, n=0) : htsGFP_st9_0024.tab.txt	4	1	342	5.199	69	0.915	59	0.825	1.16949	64	NA
MS2/MCP	htsGFP_st9	2015-07-30	Profiler (radius=10, n=0) : htsGFP_st9_0024.tab.txt	4	1	355	9.022	71	0.957	78	0.937	0.910256	74.5	NA
MS2/MCP	htsGFP_st9	2015-07-30	Profiler (radius=10, n=0) : htsGFP_st9_0024.tab.txt	4	1	357	5.197	59	0.839	72	0.856	0.819444	65.5	NA
MS2/MCP	htsGFP_st9	2015-07-30	Profiler (radius=10, n=0) : htsGFP_st9_0024.tab.txt	4	1	358	6.158	54	0.866	62	0.896	0.870968	58	NA
MS2/MCP	htsGFP_st9	2015-07-30	Profiler (radius=10, n=0) : htsGFP_st9_0024.tab.txt	4	1	372	7.392	89	0.92	93	0.832	0.956989	91	NA
MS2/MCP	htsGFP_st9	2015-07-30	Profiler (radius=10, n=0) : htsGFP_st9_0024.tab.txt	4	1	373	4.699	76	0.825	73	0.919	1.0411	74.5	NA
MS2/MCP	htsGFP_st9	2015-07-30	Profiler (radius=10, n=0) : htsGFP_st9_0024.tab.txt	4	1	386	7.404	58	0.806	49	0.855	1.18367	53.5	NA
MS2/MCP	htsGFP_st9	2015-07-30	Profiler (radius=10, n=0) : htsGFP_st9_0024.tab.txt	4	1	396	6.056	61	0.9	76	0.862	0.802632	68.5	NA
MS2/MCP	htsGFP_st9	2015-07-30	Profiler (radius=10, n=0) : htsGFP_st9_0024.tab.txt	4	1	397	6.75	65	0.924	85	0.924	0.764706	75	NA
MS2/MCP	htsGFP_st9	2015-07-30	Profiler (radius=10, n=0) : htsGFP_st9_0024.tab.txt	4	1	411	8.09	69	0.827	102	0.99	0.676471	85.5	NA
MS2/MCP	htsGFP_st9	2015-07-30	Profiler (radius=10, n=0) : htsGFP_st9_0024.tab.txt	4	1	433	4.036	75	0.932	74	0.958	1.01351	74.5	NA
MS2/MCP	htsGFP_st9	2015-07-30	Profiler (radius=10, n=0) : htsGFP_st9_0024.tab.txt	4	1	434	10.447	87	0.939	65	0.938	1.33846	76	NA
MS2/MCP	htsGFP_st9	2015-07-30	Profiler (radius=10, n=0) : htsGFP_st9_0024.tab.txt	4	1	439	9.698	135	0.961	69	0.896	1.95652	102	NA
MS2/MCP	htsGFP_st9	2015-07-30	Profiler (radius=10, n=0) : htsGFP_st9_0024.tab.txt	4	1	476	10.569	61	0.879	77	0.906	0.792208	69	NA
MS2/MCP	htsGFP_st9	2015-07-30	Profiler (radius=10, n=0) : htsGFP_st9_0024.tab.txt	4	1	484	5.723	104	0.922	75	0.942	1.38667	89.5	NA
MS2/MCP	htsGFP_st9	2015-07-30	Profiler (radius=10, n=0) : htsGFP_st9_0024.tab.txt	4	1	496	4.581	82	0.961	71	0.886	1.15493	76.5	NA
MS2/MCP	htsGFP_st9	2015-07-30	Profiler (radius=10, n=0) : htsGFP_st9_0024.tab.txt	4	1	513	3.192	61	0.933	88	0.827	0.693182	74.5	NA
MS2/MCP	htsGFP_st9	2015-07-30	Profiler (radius=10, n=0) : htsGFP_st9_0024.tab.txt	4	1	517	12.115	68	0.923	53	0.891	1.28302	60.5	NA
MS2/MCP	htsGFP_st9	2015-07-30	Profiler (radius=10, n=0) : htsGFP_st9_0024.tab.txt	4	1	530	5.26	58	0.839	53	0.856	1.09434	55.5	NA
MS2/MCP	htsGFP_st9	2015-07-30	Profiler (radius=10, n=0) : htsGFP_st9_0024.tab.txt	4	1	537	6.187	57	0.912	55	0.888	1.03636	56	NA
MS2/MCP	htsGFP_st9	2015-07-30	Profiler (radius=10, n=0) : htsGFP_st9_0024.tab.txt	4	1	549	11.865	46	0.894	54	0.94	0.851852	50	NA
MS2/MCP	htsGFP_st9	2015-07-30	Profiler (radius=10, n=0) : htsGFP_st9_0024.tab.txt	4	1	565	5.051	71	0.944	72	0.91	0.986111	71.5	NA
MS2/MCP	htsGFP_st9	2015-07-30	Profiler (radius=10, n=0) : htsGFP_st9_0024.tab.txt	4	1	572	0.463	62	0.938	64	0.957	0.96875	63	NA
MS2/MCP	htsGFP_st9	2015-07-30	Profiler (radius=10, n=0) : htsGFP_st9_0024.tab.txt	4	1	584	8.179	58	0.857	55	0.934	1.05455	56.5	NA
MS2/MCP	htsGFP_st9	2015-07-30	Profiler (radius=10, n=0) : htsGFP_st9_0024.tab.txt	4	1	590	4.166	107	0.894	70	0.865	1.52857	88.5	NA
MS2/MCP	htsGFP_st9	2015-07-30	Profiler (radius=10, n=0) : htsGFP_st9_0024.tab.txt	4	1	594	7.785	80	0.891	88	0.961	0.909091	84	NA
MS2/MCP	htsGFP_st9	2015-07-30	Profiler (radius=10, n=0) : htsGFP_st9_0024.tab.txt	4	1	595	9.235	69	0.896	74	0.865	0.932432	71.5	NA
MS2/MCP	htsGFP_st9	2015-07-30	Profiler (radius=10, n=0) : htsGFP_st9_0024.tab.txt	4	1	598	10.52	92	0.974	91	0.925	1.01099	91.5	NA
MS2/MCP	htsGFP_st9	2015-07-30	Profiler (radius=10, n=0) : htsGFP_st9_0024.tab.txt	4	1	616	5.115	94	0.96	125	0.853	0.752	109.5	NA
MS2/MCP	htsGFP_st9	2015-07-30	Profiler (radius=10, n=0) : htsGFP_st9_0024.tab.txt	4	1	654	10.204	45	0.919	57	0.962	0.789474	51	NA
MS2/MCP	htsGFP_st9	2015-07-30	Profiler (radius=10, n=0) : htsGFP_st9_0024.tab.txt	4	1	665	8.543	62	0.967	53	0.868	1.16981	57.5	NA
MS2/MCP	htsGFP_st9	2015-07-30	Profiler (radius=10, n=0) : htsGFP_st9_0024.tab.txt	4	1	674	9.075	72	0.91	74	0.986	0.972973	73	NA
MS2/MCP	htsGFP_st9	2015-07-30	Profiler (radius=10, n=0) : htsGFP_st9_0024.tab.txt	4	1	687	7.438	66	0.98	59	0.948	1.11864	62.5	NA
MS2/MCP	htsGFP_st9	2015-07-30	Profiler (radius=10, n=0) : htsGFP_st9_0024.tab.txt	4	1	698	8.39	96	0.936	116	0.918	0.827586	106	NA
MS2/MCP	htsGFP_st9	2015-07-30	Profiler (radius=10, n=0) : htsGFP_st9_0024.tab.txt	4	1	719	4.996	87	0.966	59	0.88	1.47458	73	NA
MS2/MCP	htsGFP_st9	2015-07-30	Profiler (radius=10, n=0) : htsGFP_st9_0024.tab.txt	4	1	721	7.3	48	0.867	59	0.972	0.813559	53.5	NA
MS2/MCP	htsGFP_st9	2015-07-30	Profiler (radius=10, n=0) : htsGFP_st9_0024.tab.txt	4	1	736	7.402	69	0.829	52	0.854	1.32692	60.5	NA
MS2/MCP	htsGFP_st9	2015-07-30	Profiler (radius=10, n=0) : htsGFP_st9_0024.tab.txt	4	1	744	11.04	63	0.904	58	0.938	1.08621	60.5	NA
MS2/MCP	htsGFP_st9	2015-07-30	Profiler (radius=10, n=0) : htsGFP_st9_0024.tab.txt	4	1	787	10.409	59	0.926	64	0.857	0.921875	61.5	NA
MS2/MCP	htsGFP_st9	2015-07-30	Profiler (radius=10, n=0) : htsGFP_st9_0024.tab.txt	4	1	791	5.501	65	0.893	60	0.959	1.08333	62.5	NA
MS2/MCP	htsGFP_st9	2015-07-30	Profiler (radius=10, n=0) : htsGFP_st9_0024.tab.txt	4	1	795	9.759	50	0.828	49	0.861	1.02041	49.5	NA
MS2/MCP	htsGFP_st9	2015-07-30	Profiler (radius=10, n=0) : htsGFP_st9_0024.tab.txt	4	1	804	10.55	113	0.807	62	0.926	1.82258	87.5	NA
MS2/MCP	htsGFP_st9	2015-07-30	Profiler (radius=10, n=0) : htsGFP_st9_0024.tab.txt	4	1	821	7.749	101	0.957	55	0.934	1.83636	78	NA
MS2/MCP	htsGFP_st9	2015-07-30	Profiler (radius=10, n=0) : htsGFP_st9_0024.tab.txt	4	1	857	9.522	65	0.867	53	0.855	1.22642	59	NA
MS2/MCP	htsGFP_st9	2015-07-30	Profiler (radius=10, n=0) : htsGFP_st9_0024.tab.txt	4	1	860	10.77	93	0.833	73	0.854	1.27397	83	NA
MS2/MCP	htsGFP_st9	2015-07-30	Profiler (radius=10, n=0) : htsGFP_st9_0024.tab.txt	4	1	876	4.197	116	0.898	69	0.953	1.68116	92.5	NA
MS2/MCP	htsGFP_st9	2015-07-30	Profiler (radius=10, n=0) : htsGFP_st9_0024.tab.txt	4	1	897	3.737	47	0.839	53	0.801	0.886792	50	NA
MS2/MCP	htsGFP_st9	2015-07-30	Profiler (radius=10, n=0) : htsGFP_st9_0024.tab.txt	4	1	921	7.164	41	0.829	41	0.802	1	41	NA
MS2/MCP	htsGFP_st9	2015-07-30	Profiler (radius=10, n=0) : htsGFP_st9_0024.tab.txt	4	1	922	4.324	114	0.934	57	0.912	2	85.5	NA
MS2/MCP	htsGFP_st9	2015-07-30	Profiler (radius=10, n=0) : htsGFP_st9_0024.tab.txt	4	1	940	5.882	94	0.856	54	0.94	1.74074	74	NA
MS2/MCP	htsGFP_st9	2015-07-30	Profiler (radius=10, n=0) : htsGFP_st9_0028.tab.txt	4	2	49	1.963	102	0.884	86	0.951	1.18605	94	NA
MS2/MCP	htsGFP_st9	2015-07-30	Profiler (radius=10, n=0) : htsGFP_st9_0028.tab.txt	4	2	64	2.659	89	0.871	148	0.899	0.601351	118.5	NA
MS2/MCP	htsGFP_st9	2015-07-30	Profiler (radius=10, n=0) : htsGFP_st9_0028.tab.txt	4	2	65	1.338	61	0.829	76	0.866	0.802632	68.5	NA
MS2/MCP	htsGFP_st9	2015-07-30	Profiler (radius=10, n=0) : htsGFP_st9_0028.tab.txt	4	2	75	6.634	70	0.928	91	0.962	0.769231	80.5	NA
MS2/MCP	htsGFP_st9	2015-07-30	Profiler (radius=10, n=0) : htsGFP_st9_0028.tab.txt	4	2	85	1.001	64	0.863	72	0.913	0.888889	68	NA
MS2/MCP	htsGFP_st9	2015-07-30	Profiler (radius=10, n=0) : htsGFP_st9_0028.tab.txt	4	2	93	3.555	56	0.884	87	0.85	0.643678	71.5	NA
MS2/MCP	htsGFP_st9	2015-07-30	Profiler (radius=10, n=0) : htsGFP_st9_0028.tab.txt	4	2	95	5.483	51	0.872	76	0.977	0.671053	63.5	NA
MS2/MCP	htsGFP_st9	2015-07-30	Profiler (radius=10, n=0) : htsGFP_st9_0028.tab.txt	4	2	102	12.224	87	0.959	67	0.841	1.29851	77	NA
MS2/MCP	htsGFP_st9	2015-07-30	Profiler (radius=10, n=0) : htsGFP_st9_0028.tab.txt	4	2	107	11.73	74	0.912	66	0.906	1.12121	70	NA
MS2/MCP	htsGFP_st9	2015-07-30	Profiler (radius=10, n=0) : htsGFP_st9_0028.tab.txt	4	2	112	4.022	58	0.896	59	0.891	0.983051	58.5	NA
MS2/MCP	htsGFP_st9	2015-07-30	Profiler (radius=10, n=0) : htsGFP_st9_0028.tab.txt	4	2	117	2.632	91	0.887	149	0.913	0.610738	120	NA
MS2/MCP	htsGFP_st9	2015-07-30	Profiler (radius=10, n=0) : htsGFP_st9_0028.tab.txt	4	2	144	4.87	109	0.872	64	0.903	1.70312	86.5	NA
MS2/MCP	htsGFP_st9	2015-07-30	Profiler (radius=10, n=0) : htsGFP_st9_0028.tab.txt	4	2	172	4.562	53	0.967	57	0.848	0.929825	55	NA
MS2/MCP	htsGFP_st9	2015-07-30	Profiler (radius=10, n=0) : htsGFP_st9_0028.tab.txt	4	2	180	2.656	69	0.818	86	0.907	0.802326	77.5	NA
MS2/MCP	htsGFP_st9	2015-07-30	Profiler (radius=10, n=0) : htsGFP_st9_0028.tab.txt	4	2	184	6.931	87	0.885	163	0.928	0.533742	125	NA
MS2/MCP	htsGFP_st9	2015-07-30	Profiler (radius=10, n=0) : htsGFP_st9_0028.tab.txt	4	2	210	4.29	64	0.875	92	0.964	0.695652	78	NA
MS2/MCP	htsGFP_st9	2015-07-30	Profiler (radius=10, n=0) : htsGFP_st9_0028.tab.txt	4	2	216	8.257	55	0.904	95	0.801	0.578947	75	NA
MS2/MCP	htsGFP_st9	2015-07-30	Profiler (radius=10, n=0) : htsGFP_st9_0028.tab.txt	4	2	220	3.506	57	0.87	70	0.919	0.814286	63.5	NA
MS2/MCP	htsGFP_st9	2015-07-30	Profiler (radius=10, n=0) : htsGFP_st9_0028.tab.txt	4	2	221	0.135	53	0.856	106	0.887	0.5	79.5	NA
MS2/MCP	htsGFP_st9	2015-07-30	Profiler (radius=10, n=0) : htsGFP_st9_0028.tab.txt	4	2	225	2.652	79	0.931	71	0.962	1.11268	75	NA
MS2/MCP	htsGFP_st9	2015-07-30	Profiler (radius=10, n=0) : htsGFP_st9_0028.tab.txt	4	2	235	5.109	64	0.816	64	0.947	1	64	NA
MS2/MCP	htsGFP_st9	2015-07-30	Profiler (radius=10, n=0) : htsGFP_st9_0028.tab.txt	4	2	246	6.981	62	0.801	111	0.978	0.558559	86.5	NA
MS2/MCP	htsGFP_st9	2015-07-30	Profiler (radius=10, n=0) : htsGFP_st9_0028.tab.txt	4	2	248	4.2	60	0.944	59	0.961	1.01695	59.5	NA
MS2/MCP	htsGFP_st9	2015-07-30	Profiler (radius=10, n=0) : htsGFP_st9_0028.tab.txt	4	2	253	5.316	107	0.91	82	0.939	1.30488	94.5	NA
MS2/MCP	htsGFP_st9	2015-07-30	Profiler (radius=10, n=0) : htsGFP_st9_0028.tab.txt	4	2	254	1.707	110	0.921	78	0.852	1.41026	94	NA
MS2/MCP	htsGFP_st9	2015-07-30	Profiler (radius=10, n=0) : htsGFP_st9_0028.tab.txt	4	2	264	6.097	63	0.887	60	0.908	1.05	61.5	NA
MS2/MCP	htsGFP_st9	2015-07-30	Profiler (radius=10, n=0) : htsGFP_st9_0028.tab.txt	4	2	281	8.918	78	0.955	59	0.877	1.32203	68.5	NA
MS2/MCP	htsGFP_st9	2015-07-30	Profiler (radius=10, n=0) : htsGFP_st9_0028.tab.txt	4	2	285	2.615	85	0.896	68	0.842	1.25	76.5	NA
MS2/MCP	htsGFP_st9	2015-07-30	Profiler (radius=10, n=0) : htsGFP_st9_0028.tab.txt	4	2	286	8.527	72	0.974	74	0.904	0.972973	73	NA
MS2/MCP	htsGFP_st9	2015-07-30	Profiler (radius=10, n=0) : htsGFP_st9_0028.tab.txt	4	2	291	5.788	128	0.859	67	0.942	1.91045	97.5	NA
MS2/MCP	htsGFP_st9	2015-07-30	Profiler (radius=10, n=0) : htsGFP_st9_0028.tab.txt	4	2	292	6.051	85	0.943	87	0.811	0.977011	86	NA
MS2/MCP	htsGFP_st9	2015-07-30	Profiler (radius=10, n=0) : htsGFP_st9_0028.tab.txt	4	2	293	4.695	75	0.918	61	0.912	1.22951	68	NA
MS2/MCP	htsGFP_st9	2015-07-30	Profiler (radius=10, n=0) : htsGFP_st9_0028.tab.txt	4	2	298	10.246	107	0.953	105	0.984	1.01905	106	NA
MS2/MCP	htsGFP_st9	2015-07-30	Profiler (radius=10, n=0) : htsGFP_st9_0028.tab.txt	4	2	300	5.412	80	0.895	109	0.96	0.733945	94.5	NA
MS2/MCP	htsGFP_st9	2015-07-30	Profiler (radius=10, n=0) : htsGFP_st9_0028.tab.txt	4	2	303	6.028	72	0.923	70	0.88	1.02857	71	NA
MS2/MCP	htsGFP_st9	2015-07-30	Profiler (radius=10, n=0) : htsGFP_st9_0028.tab.txt	4	2	307	6.792	99	0.929	82	0.915	1.20732	90.5	NA
MS2/MCP	htsGFP_st9	2015-07-30	Profiler (radius=10, n=0) : htsGFP_st9_0028.tab.txt	4	2	310	8.289	113	0.926	84	0.907	1.34524	98.5	NA
MS2/MCP	htsGFP_st9	2015-07-30	Profiler (radius=10, n=0) : htsGFP_st9_0028.tab.txt	4	2	318	2.755	91	0.889	100	0.882	0.91	95.5	NA
MS2/MCP	htsGFP_st9	2015-07-30	Profiler (radius=10, n=0) : htsGFP_st9_0028.tab.txt	4	2	324	8.117	116	0.967	95	0.976	1.22105	105.5	NA
MS2/MCP	htsGFP_st9	2015-07-30	Profiler (radius=10, n=0) : htsGFP_st9_0028.tab.txt	4	2	325	6.656	50	0.856	91	0.967	0.549451	70.5	NA
MS2/MCP	htsGFP_st9	2015-07-30	Profiler (radius=10, n=0) : htsGFP_st9_0028.tab.txt	4	2	326	3.707	150	0.898	125	0.957	1.2	137.5	NA
MS2/MCP	htsGFP_st9	2015-07-30	Profiler (radius=10, n=0) : htsGFP_st9_0028.tab.txt	4	2	327	6.493	67	0.923	91	0.929	0.736264	79	NA
MS2/MCP	htsGFP_st9	2015-07-30	Profiler (radius=10, n=0) : htsGFP_st9_0028.tab.txt	4	2	352	5.745	84	0.968	64	0.905	1.3125	74	NA
MS2/MCP	htsGFP_st9	2015-07-30	Profiler (radius=10, n=0) : htsGFP_st9_0028.tab.txt	4	2	354	8.58	85	0.983	63	0.958	1.34921	74	NA
MS2/MCP	htsGFP_st9	2015-07-30	Profiler (radius=10, n=0) : htsGFP_st9_0028.tab.txt	4	2	367	4.976	74	0.818	63	0.83	1.1746	68.5	NA
MS2/MCP	htsGFP_st9	2015-07-30	Profiler (radius=10, n=0) : htsGFP_st9_0028.tab.txt	4	2	379	4.057	57	0.92	82	0.975	0.695122	69.5	NA
MS2/MCP	htsGFP_st9	2015-07-30	Profiler (radius=10, n=0) : htsGFP_st9_0028.tab.txt	4	2	387	5.846	64	0.96	77	0.897	0.831169	70.5	NA
MS2/MCP	htsGFP_st9	2015-07-30	Profiler (radius=10, n=0) : htsGFP_st9_0028.tab.txt	4	2	399	7.144	78	0.93	67	0.901	1.16418	72.5	NA
MS2/MCP	htsGFP_st9	2015-07-30	Profiler (radius=10, n=0) : htsGFP_st9_0028.tab.txt	4	2	400	5.698	85	0.806	81	0.932	1.04938	83	NA
MS2/MCP	htsGFP_st9	2015-07-30	Profiler (radius=10, n=0) : htsGFP_st9_0028.tab.txt	4	2	412	5.506	95	0.959	66	0.869	1.43939	80.5	NA
MS2/MCP	htsGFP_st9	2015-07-30	Profiler (radius=10, n=0) : htsGFP_st9_0028.tab.txt	4	2	416	5.39	65	0.838	89	0.907	0.730337	77	NA
MS2/MCP	htsGFP_st9	2015-07-30	Profiler (radius=10, n=0) : htsGFP_st9_0028.tab.txt	4	2	429	10.593	45	0.902	56	0.863	0.803571	50.5	NA
MS2/MCP	htsGFP_st9	2015-07-30	Profiler (radius=10, n=0) : htsGFP_st9_0028.tab.txt	4	2	430	12.216	48	0.848	52	0.913	0.923077	50	NA
MS2/MCP	htsGFP_st9	2015-07-30	Profiler (radius=10, n=0) : htsGFP_st9_0028.tab.txt	4	2	439	6.405	68	0.852	56	0.87	1.21429	62	NA
MS2/MCP	htsGFP_st9	2015-07-30	Profiler (radius=10, n=0) : htsGFP_st9_0028.tab.txt	4	2	442	6.725	90	0.807	96	0.902	0.9375	93	NA
MS2/MCP	htsGFP_st9	2015-07-30	Profiler (radius=10, n=0) : htsGFP_st9_0028.tab.txt	4	2	443	4.635	97	0.94	138	0.965	0.702899	117.5	NA
MS2/MCP	htsGFP_st9	2015-07-30	Profiler (radius=10, n=0) : htsGFP_st9_0028.tab.txt	4	2	450	11.91	70	0.978	70	0.934	1	70	NA
MS2/MCP	htsGFP_st9	2015-07-30	Profiler (radius=10, n=0) : htsGFP_st9_0028.tab.txt	4	2	453	12.212	97	0.913	85	0.974	1.14118	91	NA
MS2/MCP	htsGFP_st9	2015-07-30	Profiler (radius=10, n=0) : htsGFP_st9_0028.tab.txt	4	2	456	8.205	68	0.898	85	0.927	0.8	76.5	NA
MS2/MCP	htsGFP_st9	2015-07-30	Profiler (radius=10, n=0) : htsGFP_st9_0028.tab.txt	4	2	457	13.516	113	0.931	62	0.834	1.82258	87.5	NA
MS2/MCP	htsGFP_st9	2015-07-30	Profiler (radius=10, n=0) : htsGFP_st9_0028.tab.txt	4	2	474	5.523	92	0.888	55	0.842	1.67273	73.5	NA
MS2/MCP	htsGFP_st9	2015-07-30	Profiler (radius=10, n=0) : htsGFP_st9_0028.tab.txt	4	2	477	8.112	66	0.97	68	0.893	0.970588	67	NA
MS2/MCP	htsGFP_st9	2015-07-30	Profiler (radius=10, n=0) : htsGFP_st9_0028.tab.txt	4	2	479	5.068	80	0.946	60	0.935	1.33333	70	NA
MS2/MCP	htsGFP_st9	2015-07-30	Profiler (radius=10, n=0) : htsGFP_st9_0028.tab.txt	4	2	482	5.565	55	0.876	98	0.881	0.561224	76.5	NA
MS2/MCP	htsGFP_st9	2015-07-30	Profiler (radius=10, n=0) : htsGFP_st9_0028.tab.txt	4	2	504	9.166	102	0.949	117	0.855	0.871795	109.5	NA
MS2/MCP	htsGFP_st9	2015-07-30	Profiler (radius=10, n=0) : htsGFP_st9_0028.tab.txt	4	2	520	10.384	64	0.926	62	0.95	1.03226	63	NA
MS2/MCP	htsGFP_st9	2015-07-30	Profiler (radius=10, n=0) : htsGFP_st9_0028.tab.txt	4	2	535	3.041	52	0.894	45	0.893	1.15556	48.5	NA
MS2/MCP	htsGFP_st9	2015-07-30	Profiler (radius=10, n=0) : htsGFP_st9_0028.tab.txt	4	2	544	6.693	47	0.895	77	0.947	0.61039	62	NA
MS2/MCP	htsGFP_st9	2015-07-30	Profiler (radius=10, n=0) : htsGFP_st9_0028.tab.txt	4	2	545	10.468	85	0.938	116	0.946	0.732759	100.5	NA
MS2/MCP	htsGFP_st9	2015-07-30	Profiler (radius=10, n=0) : htsGFP_st9_0028.tab.txt	4	2	551	4.063	81	0.905	79	0.905	1.02532	80	NA
MS2/MCP	htsGFP_st9	2015-07-30	Profiler (radius=10, n=0) : htsGFP_st9_0028.tab.txt	4	2	553	5.916	84	0.943	64	0.947	1.3125	74	NA
MS2/MCP	htsGFP_st9	2015-07-30	Profiler (radius=10, n=0) : htsGFP_st9_0028.tab.txt	4	2	557	11.082	95	0.816	64	0.823	1.48438	79.5	NA
MS2/MCP	htsGFP_st9	2015-07-30	Profiler (radius=10, n=0) : htsGFP_st9_0028.tab.txt	4	2	570	8.604	137	0.97	78	0.826	1.75641	107.5	NA
MS2/MCP	htsGFP_st9	2015-07-30	Profiler (radius=10, n=0) : htsGFP_st9_0028.tab.txt	4	2	586	9.386	71	0.954	66	0.895	1.07576	68.5	NA
MS2/MCP	htsGFP_st9	2015-07-30	Profiler (radius=10, n=0) : htsGFP_st9_0028.tab.txt	4	2	594	7.833	85	0.854	63	0.975	1.34921	74	NA
MS2/MCP	htsGFP_st9	2015-07-30	Profiler (radius=10, n=0) : htsGFP_st9_0028.tab.txt	4	2	601	7.478	56	0.879	64	0.945	0.875	60	NA
MS2/MCP	htsGFP_st9	2015-07-30	Profiler (radius=10, n=0) : htsGFP_st9_0028.tab.txt	4	2	605	10.626	65	0.855	98	0.947	0.663265	81.5	NA
MS2/MCP	htsGFP_st9	2015-07-30	Profiler (radius=10, n=0) : htsGFP_st9_0028.tab.txt	4	2	611	6.681	55	0.888	58	0.896	0.948276	56.5	NA
MS2/MCP	htsGFP_st9	2015-07-30	Profiler (radius=10, n=0) : htsGFP_st9_0028.tab.txt	4	2	620	3.119	64	0.953	126	0.86	0.507937	95	NA
MS2/MCP	htsGFP_st9	2015-07-30	Profiler (radius=10, n=0) : htsGFP_st9_0028.tab.txt	4	2	626	7.311	72	0.95	78	0.915	0.923077	75	NA
MS2/MCP	htsGFP_st9	2015-07-30	Profiler (radius=10, n=0) : htsGFP_st9_0028.tab.txt	4	2	642	7.6	60	0.925	82	0.925	0.731707	71	NA
MS2/MCP	htsGFP_st9	2015-07-30	Profiler (radius=10, n=0) : htsGFP_st9_0028.tab.txt	4	2	645	8.575	56	0.854	58	0.912	0.965517	57	NA
MS2/MCP	htsGFP_st9	2015-07-30	Profiler (radius=10, n=0) : htsGFP_st9_0028.tab.txt	4	2	654	8.261	118	0.917	78	0.859	1.51282	98	NA
MS2/MCP	htsGFP_st9	2015-07-30	Profiler (radius=10, n=0) : htsGFP_st9_0028.tab.txt	4	2	658	7.552	62	0.954	89	0.922	0.696629	75.5	NA
MS2/MCP	htsGFP_st9	2015-07-30	Profiler (radius=10, n=0) : htsGFP_st9_0028.tab.txt	4	2	659	4.15	143	0.95	74	0.947	1.93243	108.5	NA
MS2/MCP	htsGFP_st9	2015-07-30	Profiler (radius=10, n=0) : htsGFP_st9_0028.tab.txt	4	2	674	11.995	72	0.946	68	0.867	1.05882	70	NA
MS2/MCP	htsGFP_st9	2015-07-30	Profiler (radius=10, n=0) : htsGFP_st9_0028.tab.txt	4	2	677	13.744	72	0.947	67	0.927	1.07463	69.5	NA
MS2/MCP	htsGFP_st9	2015-07-30	Profiler (radius=10, n=0) : htsGFP_st9_0028.tab.txt	4	2	693	15.429	79	0.944	59	0.908	1.33898	69	NA
MS2/MCP	htsGFP_st9	2015-07-30	Profiler (radius=10, n=0) : htsGFP_st9_0028.tab.txt	4	2	695	7.325	96	0.904	141	0.852	0.680851	118.5	NA
MS2/MCP	htsGFP_st9	2015-07-30	Profiler (radius=10, n=0) : htsGFP_st9_0028.tab.txt	4	2	730	4.797	39	0.818	52	0.866	0.75	45.5	NA
MS2/MCP	htsGFP_st9	2015-07-30	Profiler (radius=10, n=0) : htsGFP_st9_0028.tab.txt	4	2	734	9.015	65	0.894	56	0.857	1.16071	60.5	NA
MS2/MCP	htsGFP_st9	2015-07-30	Profiler (radius=10, n=0) : htsGFP_st9_0028.tab.txt	4	2	737	14.147	87	0.952	51	0.84	1.70588	69	NA
MS2/MCP	htsGFP_st9	2015-07-30	Profiler (radius=10, n=0) : htsGFP_st9_0028.tab.txt	4	2	740	7.875	76	0.911	83	0.84	0.915663	79.5	NA
MS2/MCP	htsGFP_st9	2015-07-30	Profiler (radius=10, n=0) : htsGFP_st9_0028.tab.txt	4	2	742	5.173	57	0.882	100	0.875	0.57	78.5	NA
MS2/MCP	htsGFP_st9	2015-07-30	Profiler (radius=10, n=0) : htsGFP_st9_0028.tab.txt	4	2	758	6.003	98	0.876	81	0.892	1.20988	89.5	NA
MS2/MCP	htsGFP_st9	2015-07-30	Profiler (radius=10, n=0) : htsGFP_st9_0028.tab.txt	4	2	760	13.509	85	0.908	59	0.94	1.44068	72	NA
MS2/MCP	htsGFP_st9	2015-07-30	Profiler (radius=10, n=0) : htsGFP_st9_0028.tab.txt	4	2	767	7.083	48	0.94	78	0.893	0.615385	63	NA
MS2/MCP	htsGFP_st9	2015-07-30	Profiler (radius=10, n=0) : htsGFP_st9_0028.tab.txt	4	2	770	7.818	54	0.898	42	0.902	1.28571	48	NA
MS2/MCP	htsGFP_st9	2015-07-30	Profiler (radius=10, n=0) : htsGFP_st9_0028.tab.txt	4	2	799	13.206	85	0.897	110	0.939	0.772727	97.5	NA
MS2/MCP	htsGFP_st9	2015-07-30	Profiler (radius=10, n=0) : htsGFP_st9_0028.tab.txt	4	2	814	6.033	66	0.863	45	0.92	1.46667	55.5	NA
MS2/MCP	htsGFP_st9	2015-07-30	Profiler (radius=10, n=0) : htsGFP_st9_0028.tab.txt	4	2	819	3.726	74	0.904	66	0.863	1.12121	70	NA
MS2/MCP	htsGFP_st9	2015-07-30	Profiler (radius=10, n=0) : htsGFP_st9_0028.tab.txt	4	2	838	11.685	58	0.917	73	0.911	0.794521	65.5	NA
MS2/MCP	htsGFP_st9	2015-07-30	Profiler (radius=10, n=0) : htsGFP_st9_0028.tab.txt	4	2	847	12.92	86	0.816	45	0.87	1.91111	65.5	NA
MS2/MCP	htsGFP_st9	2015-07-30	Profiler (radius=10, n=0) : htsGFP_st9_0028.tab.txt	4	2	848	5.317	53	0.87	99	0.909	0.535354	76	NA
MS2/MCP	htsGFP_st9	2015-07-30	Profiler (radius=10, n=0) : htsGFP_st9_0028.tab.txt	4	2	851	0.527	52	0.904	50	0.829	1.04	51	NA
MS2/MCP	htsGFP_st9	2015-07-30	Profiler (radius=10, n=0) : htsGFP_st9_0028.tab.txt	4	2	858	8.017	100	0.869	65	0.962	1.53846	82.5	NA
MS2/MCP	htsGFP_st9	2015-07-30	Profiler (radius=10, n=0) : htsGFP_st9_0028.tab.txt	4	2	862	9.832	58	0.9	59	0.923	0.983051	58.5	NA
MS2/MCP	htsGFP_st9	2015-07-30	Profiler (radius=10, n=0) : htsGFP_st9_0028.tab.txt	4	2	878	6.907	87	0.812	66	0.889	1.31818	76.5	NA
MS2/MCP	htsGFP_st9	2015-07-30	Profiler (radius=10, n=0) : htsGFP_st9_0028.tab.txt	4	2	881	6.06	54	0.82	61	0.843	0.885246	57.5	NA
MS2/MCP	htsGFP_st9	2015-07-30	Profiler (radius=10, n=0) : htsGFP_st9_0028.tab.txt	4	2	894	8.903	101	0.856	78	0.846	1.29487	89.5	NA
MS2/MCP	htsGFP_st9	2015-07-30	Profiler (radius=10, n=0) : htsGFP_st9_0028.tab.txt	4	2	900	11.408	102	0.911	65	0.958	1.56923	83.5	NA
MS2/MCP	htsGFP_st9	2015-07-30	Profiler (radius=10, n=0) : htsGFP_st9_0028.tab.txt	4	2	903	9.957	75	0.958	59	0.802	1.27119	67	NA
MS2/MCP	htsGFP_st9	2015-07-30	Profiler (radius=10, n=0) : htsGFP_st9_0028.tab.txt	4	2	906	11.267	117	0.909	87	0.934	1.34483	102	NA
MS2/MCP	htsGFP_st9	2015-07-30	Profiler (radius=10, n=0) : htsGFP_st9_0028.tab.txt	4	2	925	7.667	53	0.824	43	0.837	1.23256	48	NA
MS2/MCP	htsGFP_st9	2015-07-30	Profiler (radius=10, n=0) : htsGFP_st9_0028.tab.txt	4	2	927	5.265	71	0.878	71	0.927	1	71	NA
MS2/MCP	htsGFP_st9	2015-07-30	Profiler (radius=10, n=0) : htsGFP_st9_0028.tab.txt	4	2	930	5.678	76	0.846	61	0.869	1.2459	68.5	NA
MS2/MCP	htsGFP_st9	2015-07-30	Profiler (radius=10, n=0) : htsGFP_st9_0028.tab.txt	4	2	948	6.795	86	0.969	91	0.832	0.945055	88.5	NA
MS2/MCP	htsGFP_st9	2015-07-30	Profiler (radius=10, n=0) : htsGFP_st9_0028.tab.txt	4	2	964	12.353	113	0.889	64	0.863	1.76562	88.5	NA
MS2/MCP	bcdGFP-exu1_st9	2015-06-26	Profiler (radius=10) : bcdGFP_exu1_0003.tab.txt	1	2	10	NA	86	0.854	171	0.841	0.502924	128.5	NA
MS2/MCP	bcdGFP-exu1_st9	2015-06-26	Profiler (radius=10) : bcdGFP_exu1_0006.tab.txt	1	3	38	NA	109	0.944	215	0.858	0.506977	162	NA
MS2/MCP	bcdGFP-exu1_st9	2015-06-26	Profiler (radius=10) : bcdGFP_exu1_0008.tab.txt	1	4	3	NA	141	0.89	108	0.987	1.30556	124.5	NA
MS2/MCP	bcdGFP-exu1_st9	2015-06-26	Profiler (radius=10) : bcdGFP_exu1_0008.tab.txt	1	4	4	NA	126	0.966	79	0.899	1.59494	102.5	NA
MS2/MCP	bcdGFP-exu1_st9	2015-06-26	Profiler (radius=10) : bcdGFP_exu1_0010.tab.txt	1	4	5	NA	131	0.961	72	0.852	1.81944	101.5	NA
MS2/MCP	bcdGFP-exu1_st9	2015-06-26	Profiler (radius=10) : bcdGFP_exu1_0010.tab.txt	1	4	9	NA	75	0.857	98	0.922	0.765306	86.5	NA
MS2/MCP	bcdGFP-exu1_st9	2015-06-26	Profiler (radius=10) : bcdGFP_exu1_0010.tab.txt	1	4	11	NA	153	0.953	151	0.994	1.01325	152	NA
MS2/MCP	bcdGFP-exu1_st9	2015-06-26	Profiler (radius=10) : bcdGFP_exu1_0010.tab.txt	1	4	19	NA	164	0.985	113	0.869	1.45133	138.5	NA
MS2/MCP	bcdGFP-exu1_st9	2015-06-26	Profiler (radius=10) : bcdGFP_exu1_0010.tab.txt	1	4	21	NA	131	0.97	85	0.882	1.54118	108	NA
MS2/MCP	bcdGFP-exu1_st9	2015-06-26	Profiler (radius=10) : bcdGFP_exu1_0010.tab.txt	1	4	22	NA	120	0.907	81	0.95	1.48148	100.5	NA
MS2/MCP	bcdGFP-exu1_st9	2015-06-26	Profiler (radius=10) : bcdGFP_exu1_0010.tab.txt	1	4	24	NA	160	0.902	146	0.817	1.09589	153	NA
MS2/MCP	bcdGFP-exu1_st9	2015-06-26	Profiler (radius=10) : bcdGFP_exu1_0010.tab.txt	1	4	27	NA	70	0.812	111	0.962	0.630631	90.5	NA
MS2/MCP	bcdGFP-exu1_st9	2015-06-26	Profiler (radius=10) : bcdGFP_exu1_0010.tab.txt	1	4	35	NA	155	0.92	111	0.963	1.3964	133	NA
MS2/MCP	bcdGFP-exu1_st9	2015-06-26	Profiler (radius=10) : bcdGFP_exu1_0010.tab.txt	1	4	40	NA	134	0.982	86	0.911	1.55814	110	NA
MS2/MCP	bcdGFP-exu1_st9	2015-06-26	Profiler (radius=10) : bcdGFP_exu1_0011.tab.txt	1	1	4	NA	90	0.978	172	0.858	0.523256	131	NA
MS2/MCP	bcdGFP-exu1_st9	2015-06-26	Profiler (radius=10) : bcdGFP_exu1_0011.tab.txt	1	1	7	NA	101	0.958	78	0.88	1.29487	89.5	NA
MS2/MCP	bcdGFP-exu1_st9	2015-06-26	Profiler (radius=10) : bcdGFP_exu1_0011.tab.txt	1	1	10	NA	116	0.983	98	0.827	1.18367	107	NA
MS2/MCP	bcdGFP-exu1_st9	2015-06-26	Profiler (radius=10) : bcdGFP_exu1_0011.tab.txt	1	1	18	NA	102	0.978	105	0.924	0.971429	103.5	NA
MS2/MCP	bcdGFP-exu1_st9	2015-06-26	Profiler (radius=10) : bcdGFP_exu1_0011.tab.txt	1	1	21	NA	101	0.964	99	0.849	1.0202	100	NA
MS2/MCP	bcdGFP-exu1_st9	2015-06-26	Profiler (radius=10) : bcdGFP_exu1_0011.tab.txt	1	1	26	NA	90	0.943	81	0.928	1.11111	85.5	NA
MS2/MCP	bcdGFP-exu1_st9	2015-06-26	Profiler (radius=10) : bcdGFP_exu1_0011.tab.txt	1	1	27	NA	79	0.823	83	0.961	0.951807	81	NA
MS2/MCP	bcdGFP-exu1_st9	2015-06-26	Profiler (radius=10) : bcdGFP_exu1_0011.tab.txt	1	1	33	NA	156	0.961	122	0.949	1.27869	139	NA
MS2/MCP	bcdGFP-exu1_st9	2015-06-26	Profiler (radius=10) : bcdGFP_exu1_0011.tab.txt	1	1	40	NA	81	0.955	117	0.935	0.692308	99	NA
MS2/MCP	bcdGFP-exu1_st9	2015-06-26	Profiler (radius=10) : bcdGFP_exu1_0011.tab.txt	1	1	42	NA	54	0.843	106	0.835	0.509434	80	NA
MS2/MCP	bcdGFP-exu1_st9	2015-06-26	Profiler (radius=10) : bcdGFP_exu1_0011.tab.txt	1	1	44	NA	77	0.914	62	0.804	1.24194	69.5	NA
MS2/MCP	bcdGFP-exu1_st9	2015-06-26	Profiler (radius=10) : bcdGFP_exu1_0011.tab.txt	1	1	45	NA	38	0.85	45	0.823	0.844444	41.5	NA
MS2/MCP	bcdGFP-exu1_st9	2015-06-26	Profiler (radius=10) : bcdGFP_exu1_0011.tab.txt	1	1	52	NA	107	0.851	135	0.812	0.792593	121	NA
MS2/MCP	bcdGFP-exu1_st9	2015-06-26	Profiler (radius=10) : bcdGFP_exu1_0011.tab.txt	1	1	54	NA	60	0.939	78	0.891	0.769231	69	NA
MS2/MCP	bcdGFP-exu1_st9	2015-06-26	Profiler (radius=10) : bcdGFP_exu1_0011.tab.txt	1	1	56	NA	86	0.834	55	0.904	1.56364	70.5	NA
MS2/MCP	bcdGFP-exu1_st9	2015-06-26	Profiler (radius=10) : bcdGFP_exu1_0013.tab.txt	2	1	8	NA	110	0.829	72	0.809	1.52778	91	NA
MS2/MCP	bcdGFP-exu1_st9	2015-06-26	Profiler (radius=10) : bcdGFP_exu1_0013.tab.txt	2	1	9	NA	79	0.963	131	0.809	0.603053	105	NA
MS2/MCP	bcdGFP-exu1_st9	2015-06-26	Profiler (radius=10) : bcdGFP_exu1_0013.tab.txt	2	1	11	NA	77	0.961	87	0.908	0.885057	82	NA
MS2/MCP	bcdGFP-exu1_st9	2015-06-26	Profiler (radius=10) : bcdGFP_exu1_0013.tab.txt	2	1	13	NA	107	0.85	86	0.853	1.24419	96.5	NA
MS2/MCP	bcdGFP-exu1_st9	2015-06-26	Profiler (radius=10) : bcdGFP_exu1_0013.tab.txt	2	1	14	NA	79	0.938	88	0.928	0.897727	83.5	NA
MS2/MCP	bcdGFP-exu1_st9	2015-06-26	Profiler (radius=10) : bcdGFP_exu1_0013.tab.txt	2	1	19	NA	82	0.874	156	0.927	0.525641	119	NA
MS2/MCP	bcdGFP-exu1_st9	2015-06-26	Profiler (radius=10) : bcdGFP_exu1_0013.tab.txt	2	1	33	NA	57	0.869	72	0.964	0.791667	64.5	NA
MS2/MCP	bcdGFP-exu1_st9	2015-06-26	Profiler (radius=10) : bcdGFP_exu1_0013.tab.txt	2	1	37	NA	56	0.951	82	0.858	0.682927	69	NA
MS2/MCP	bcdGFP-exu1_st9	2015-06-26	Profiler (radius=10) : bcdGFP_exu1_0013.tab.txt	2	1	43	NA	77	0.831	55	0.82	1.4	66	NA
MS2/MCP	bcdGFP-exu1_st9	2015-06-26	Profiler (radius=10) : bcdGFP_exu1_0013.tab.txt	2	1	57	NA	83	0.944	46	0.889	1.80435	64.5	NA
MS2/MCP	bcdGFP-exu1_st9	2015-06-26	Profiler (radius=10) : bcdGFP_exu1_0013.tab.txt	2	1	59	NA	83	0.898	61	0.837	1.36066	72	NA
MS2/MCP	bcdGFP-exu1_st9	2015-06-26	Profiler (radius=10) : bcdGFP_exu1_0013.tab.txt	2	1	67	NA	159	0.865	89	0.808	1.78652	124	NA
MS2/MCP	bcdGFP-exu1_st9	2015-06-26	Profiler (radius=10) : bcdGFP_exu1_0015.tab.txt	2	2	7	NA	148	0.858	81	0.9	1.82716	114.5	NA
MS2/MCP	bcdGFP-exu1_st9	2015-06-26	Profiler (radius=10) : bcdGFP_exu1_0015.tab.txt	2	2	8	NA	75	0.875	91	0.96	0.824176	83	NA
MS2/MCP	bcdGFP-exu1_st9	2015-06-26	Profiler (radius=10) : bcdGFP_exu1_0015.tab.txt	2	2	9	NA	46	0.817	63	0.906	0.730159	54.5	NA
MS2/MCP	bcdGFP-exu1_st9	2015-06-26	Profiler (radius=10) : bcdGFP_exu1_0015.tab.txt	2	2	10	NA	68	0.967	98	0.971	0.693878	83	NA
MS2/MCP	bcdGFP-exu1_st9	2015-06-26	Profiler (radius=10) : bcdGFP_exu1_0015.tab.txt	2	2	12	NA	95	0.876	159	0.816	0.597484	127	NA
MS2/MCP	bcdGFP-exu1_st9	2015-06-26	Profiler (radius=10) : bcdGFP_exu1_0015.tab.txt	2	2	14	NA	130	0.896	89	0.962	1.46067	109.5	NA
MS2/MCP	bcdGFP-exu1_st9	2015-06-26	Profiler (radius=10) : bcdGFP_exu1_0015.tab.txt	2	2	18	NA	59	0.86	91	0.95	0.648352	75	NA
MS2/MCP	bcdGFP-exu1_st9	2015-06-26	Profiler (radius=10) : bcdGFP_exu1_0015.tab.txt	2	2	24	NA	63	0.903	102	0.845	0.617647	82.5	NA
MS2/MCP	bcdGFP-exu1_st9	2015-06-26	Profiler (radius=10) : bcdGFP_exu1_0015.tab.txt	2	2	29	NA	70	0.943	91	0.921	0.769231	80.5	NA
MS2/MCP	bcdGFP-exu1_st9	2015-06-26	Profiler (radius=10) : bcdGFP_exu1_0015.tab.txt	2	2	38	NA	87	0.943	118	0.883	0.737288	102.5	NA
MS2/MCP	bcdGFP-exu1_st9	2015-06-26	Profiler (radius=10) : bcdGFP_exu1_0016.tab.txt	2	2	3	NA	83	0.943	113	0.957	0.734513	98	NA
MS2/MCP	bcdGFP-exu1_st9	2015-06-26	Profiler (radius=10) : bcdGFP_exu1_0016.tab.txt	2	2	6	NA	68	0.952	85	0.968	0.8	76.5	NA
MS2/MCP	bcdGFP-exu1_st9	2015-06-26	Profiler (radius=10) : bcdGFP_exu1_0016.tab.txt	2	2	8	NA	112	0.923	82	0.941	1.36585	97	NA
MS2/MCP	bcdGFP-exu1_st9	2015-06-26	Profiler (radius=10) : bcdGFP_exu1_0016.tab.txt	2	2	18	NA	88	0.941	133	0.823	0.661654	110.5	NA
MS2/MCP	bcdGFP-exu1_st9	2015-06-26	Profiler (radius=10) : bcdGFP_exu1_0016.tab.txt	2	2	22	NA	126	0.909	85	0.962	1.48235	105.5	NA
MS2/MCP	bcdGFP-exu1_st9	2015-06-26	Profiler (radius=10) : bcdGFP_exu1_0016.tab.txt	2	2	26	NA	54	0.911	56	0.851	0.964286	55	NA
MS2/MCP	bcdGFP-exu1_st9	2015-06-26	Profiler (radius=10) : bcdGFP_exu1_0016.tab.txt	2	2	29	NA	56	0.878	90	0.919	0.622222	73	NA
MS2/MCP	bcdGFP-exu1_st9	2015-06-26	Profiler (radius=10) : bcdGFP_exu1_0016.tab.txt	2	2	32	NA	60	0.877	73	0.867	0.821918	66.5	NA
MS2/MCP	bcdGFP-exu1_st9	2015-06-26	Profiler (radius=10) : bcdGFP_exu1_0018.tab.txt	2	3	12	NA	97	0.959	92	0.943	1.05435	94.5	NA
MS2/MCP	bcdGFP-exu1_st9	2015-06-26	Profiler (radius=10) : bcdGFP_exu1_0018.tab.txt	2	3	14	NA	116	0.819	114	0.962	1.01754	115	NA
MS2/MCP	bcdGFP-exu1_st9	2015-06-26	Profiler (radius=10) : bcdGFP_exu1_0018.tab.txt	2	3	26	NA	57	0.901	75	0.979	0.76	66	NA
MS2/MCP	bcdGFP-exu1_st9	2015-06-26	Profiler (radius=10) : bcdGFP_exu1_0018.tab.txt	2	3	28	NA	122	0.842	82	0.949	1.4878	102	NA
MS2/MCP	bcdGFP-exu1_st9	2015-06-26	Profiler (radius=10) : bcdGFP_exu1_0020.tab.txt	2	4	3	NA	109	0.92	110	0.863	0.990909	109.5	NA
MS2/MCP	bcdGFP-exu1_st9	2015-06-26	Profiler (radius=10) : bcdGFP_exu1_0020.tab.txt	2	4	10	NA	48	0.929	73	0.848	0.657534	60.5	NA
MS2/MCP	bcdGFP-exu1_st9	2015-06-26	Profiler (radius=10) : bcdGFP_exu1_0022.tab.txt	2	4	2	NA	89	0.911	95	0.985	0.936842	92	NA
MS2/MCP	bcdGFP-exu1_st9	2015-06-26	Profiler (radius=10) : bcdGFP_exu1_0022.tab.txt	2	4	3	NA	87	0.933	74	0.971	1.17568	80.5	NA
MS2/MCP	bcdGFP-exu1_st9	2015-06-26	Profiler (radius=10) : bcdGFP_exu1_0022.tab.txt	2	4	6	NA	71	0.851	87	0.926	0.816092	79	NA
MS2/MCP	bcdGFP-exu1_st9	2015-06-26	Profiler (radius=10) : bcdGFP_exu1_0022.tab.txt	2	4	11	NA	128	0.937	124	0.833	1.03226	126	NA
MS2/MCP	bcdGFP-exu1_st9	2015-06-26	Profiler (radius=10) : bcdGFP_exu1_0022.tab.txt	2	4	19	NA	49	0.868	50	0.934	0.98	49.5	NA
MS2/MCP	bcdGFP-exu1_st9	2015-06-26	Profiler (radius=10) : bcdGFP_exu1_0022.tab.txt	2	4	24	NA	67	0.931	54	0.95	1.24074	60.5	NA
MS2/MCP	bcdGFP-exu1_st9	2015-06-26	Profiler (radius=10) : bcdGFP_exu1_0022.tab.txt	2	4	26	NA	61	0.969	55	0.927	1.10909	58	NA
MS2/MCP	bcdGFP-exu1_st9	2015-06-26	Profiler (radius=10) : bcdGFP_exu1_0022.tab.txt	2	4	34	NA	75	0.948	74	0.891	1.01351	74.5	NA
MS2/MCP	bcdGFP-exu1_st9	2015-06-26	Profiler (radius=10) : bcdGFP_exu1_0024.tab.txt	2	4	4	NA	92	0.896	104	0.876	0.884615	98	NA
MS2/MCP	bcdGFP-exu1_st9	2015-06-26	Profiler (radius=10) : bcdGFP_exu1_0024.tab.txt	2	4	8	NA	51	0.814	70	0.834	0.728571	60.5	NA
MS2/MCP	bcdGFP-exu1_st9	2015-06-26	Profiler (radius=10) : bcdGFP_exu1_0024.tab.txt	2	4	26	NA	66	0.893	55	0.815	1.2	60.5	NA
MS2/MCP	bcdGFP-exu1_st9	2015-06-26	Profiler (radius=10) : bcdGFP_exu1_0024.tab.txt	2	4	65	NA	76	0.927	69	0.85	1.10145	72.5	NA
MS2/MCP	bcdGFP-exu1_st9	2015-07-30	Profiler (radius=10) : bcdGFP_exu1_st9_0000.tab.txt	1	1	12	NA	85	0.98	95	0.93	0.894737	90	NA
MS2/MCP	bcdGFP-exu1_st9	2015-07-30	Profiler (radius=10) : bcdGFP_exu1_st9_0000.tab.txt	1	1	13	NA	161	0.851	89	0.951	1.80899	125	NA
MS2/MCP	bcdGFP-exu1_st9	2015-07-30	Profiler (radius=10) : bcdGFP_exu1_st9_0000.tab.txt	1	1	20	NA	99	0.889	81	0.862	1.22222	90	NA
MS2/MCP	bcdGFP-exu1_st9	2015-07-30	Profiler (radius=10) : bcdGFP_exu1_st9_0000.tab.txt	1	1	23	NA	52	0.843	53	0.802	0.981132	52.5	NA
MS2/MCP	bcdGFP-exu1_st9	2015-07-30	Profiler (radius=10) : bcdGFP_exu1_st9_0000.tab.txt	1	1	31	NA	104	0.809	79	0.898	1.31646	91.5	NA
MS2/MCP	bcdGFP-exu1_st9	2015-07-30	Profiler (radius=10) : bcdGFP_exu1_st9_0000.tab.txt	1	1	32	NA	70	0.889	80	0.912	0.875	75	NA
MS2/MCP	bcdGFP-exu1_st9	2015-07-30	Profiler (radius=10) : bcdGFP_exu1_st9_0000.tab.txt	1	1	43	NA	78	0.833	88	0.919	0.886364	83	NA
MS2/MCP	bcdGFP-exu1_st9	2015-07-30	Profiler (radius=10) : bcdGFP_exu1_st9_0004.tab.txt	1	2	16	NA	70	0.889	114	0.911	0.614035	92	NA
MS2/MCP	bcdGFP-exu1_st9	2015-07-30	Profiler (radius=10) : bcdGFP_exu1_st9_0004.tab.txt	1	2	27	NA	120	0.945	81	0.907	1.48148	100.5	NA
MS2/MCP	bcdGFP-exu1_st9	2015-07-30	Profiler (radius=10) : bcdGFP_exu1_st9_0004.tab.txt	1	2	29	NA	113	0.911	106	0.963	1.06604	109.5	NA
MS2/MCP	bcdGFP-exu1_st9	2015-07-30	Profiler (radius=10) : bcdGFP_exu1_st9_0004.tab.txt	1	2	39	NA	117	0.961	93	0.958	1.25806	105	NA
MS2/MCP	bcdGFP-exu1_st9	2015-07-30	Profiler (radius=10) : bcdGFP_exu1_st9_0004.tab.txt	1	2	43	NA	67	0.941	123	0.86	0.544715	95	NA
MS2/MCP	bcdGFP-exu1_st9	2015-07-30	Profiler (radius=10) : bcdGFP_exu1_st9_0004.tab.txt	1	2	45	NA	76	0.833	103	0.929	0.737864	89.5	NA
MS2/MCP	bcdGFP-exu1_st9	2015-07-30	Profiler (radius=10) : bcdGFP_exu1_st9_0004.tab.txt	1	2	52	NA	107	0.969	79	0.975	1.35443	93	NA
MS2/MCP	bcdGFP-exu1_st9	2015-07-30	Profiler (radius=10) : bcdGFP_exu1_st9_0004.tab.txt	1	2	53	NA	50	0.925	73	0.985	0.684932	61.5	NA
MS2/MCP	bcdGFP-exu1_st9	2015-07-30	Profiler (radius=10) : bcdGFP_exu1_st9_0004.tab.txt	1	2	57	NA	76	0.869	97	0.841	0.783505	86.5	NA
MS2/MCP	bcdGFP-exu1_st9	2015-07-30	Profiler (radius=10) : bcdGFP_exu1_st9_0004.tab.txt	1	2	60	NA	81	0.952	76	0.916	1.06579	78.5	NA
MS2/MCP	bcdGFP-exu1_st9	2015-07-30	Profiler (radius=10) : bcdGFP_exu1_st9_0004.tab.txt	1	2	61	NA	88	0.945	114	0.955	0.77193	101	NA
MS2/MCP	bcdGFP-exu1_st9	2015-07-30	Profiler (radius=10) : bcdGFP_exu1_st9_0004.tab.txt	1	2	67	NA	75	0.971	99	0.977	0.757576	87	NA
MS2/MCP	bcdGFP-exu1_st9	2015-07-30	Profiler (radius=10) : bcdGFP_exu1_st9_0004.tab.txt	1	2	68	NA	72	0.958	62	0.902	1.16129	67	NA
MS2/MCP	bcdGFP-exu1_st9	2015-07-30	Profiler (radius=10) : bcdGFP_exu1_st9_0004.tab.txt	1	2	75	NA	81	0.895	52	0.819	1.55769	66.5	NA
MS2/MCP	bcdGFP-exu1_st9	2015-07-30	Profiler (radius=10) : bcdGFP_exu1_st9_0004.tab.txt	1	2	80	NA	77	0.814	141	0.885	0.546099	109	NA
MS2/MCP	bcdGFP-exu1_st9	2015-07-30	Profiler (radius=10) : bcdGFP_exu1_st9_0004.tab.txt	1	2	84	NA	67	0.905	94	0.932	0.712766	80.5	NA
MS2/MCP	bcdGFP-exu1_st9	2015-07-30	Profiler (radius=10) : bcdGFP_exu1_st9_0004.tab.txt	1	2	90	NA	51	0.814	92	0.905	0.554348	71.5	NA
MS2/MCP	bcdGFP-exu1_st9	2015-07-30	Profiler (radius=10) : bcdGFP_exu1_st9_0004.tab.txt	1	2	102	NA	84	0.885	61	0.924	1.37705	72.5	NA
MS2/MCP	bcdGFP-exu1_st9	2015-07-30	Profiler (radius=10) : bcdGFP_exu1_st9_0004.tab.txt	1	2	104	NA	119	0.951	194	0.951	0.613402	156.5	NA
MS2/MCP	bcdGFP-exu1_st9	2015-07-30	Profiler (radius=10) : bcdGFP_exu1_st9_0004.tab.txt	1	2	105	NA	88	0.881	47	0.877	1.87234	67.5	NA
MS2/MCP	bcdGFP-exu1_st9	2015-07-30	Profiler (radius=10) : bcdGFP_exu1_st9_0007.tab.txt	1	3	4	NA	87	0.941	117	0.942	0.74359	102	NA
MS2/MCP	bcdGFP-exu1_st9	2015-07-30	Profiler (radius=10) : bcdGFP_exu1_st9_0007.tab.txt	1	3	14	NA	111	0.879	97	0.949	1.14433	104	NA
MS2/MCP	bcdGFP-exu1_st9	2015-07-30	Profiler (radius=10) : bcdGFP_exu1_st9_0007.tab.txt	1	3	16	NA	126	0.956	96	0.895	1.3125	111	NA
MS2/MCP	bcdGFP-exu1_st9	2015-07-30	Profiler (radius=10) : bcdGFP_exu1_st9_0007.tab.txt	1	3	29	NA	83	0.97	98	0.957	0.846939	90.5	NA
MS2/MCP	bcdGFP-exu1_st9	2015-07-30	Profiler (radius=10) : bcdGFP_exu1_st9_0007.tab.txt	1	3	30	NA	97	0.93	119	0.82	0.815126	108	NA
MS2/MCP	bcdGFP-exu1_st9	2015-07-30	Profiler (radius=10) : bcdGFP_exu1_st9_0007.tab.txt	1	3	31	NA	80	0.885	89	0.909	0.898876	84.5	NA
MS2/MCP	bcdGFP-exu1_st9	2015-07-30	Profiler (radius=10) : bcdGFP_exu1_st9_0007.tab.txt	1	3	37	NA	48	0.938	86	0.856	0.55814	67	NA
MS2/MCP	bcdGFP-exu1_st9	2015-07-30	Profiler (radius=10) : bcdGFP_exu1_st9_0007.tab.txt	1	3	40	NA	65	0.861	91	0.951	0.714286	78	NA
MS2/MCP	bcdGFP-exu1_st9	2015-07-30	Profiler (radius=10) : bcdGFP_exu1_st9_0007.tab.txt	1	3	43	NA	67	0.856	55	0.934	1.21818	61	NA
MS2/MCP	bcdGFP-exu1_st9	2015-07-30	Profiler (radius=10) : bcdGFP_exu1_st9_0007.tab.txt	1	3	44	NA	57	0.9	78	0.93	0.730769	67.5	NA
MS2/MCP	bcdGFP-exu1_st9	2015-07-30	Profiler (radius=10) : bcdGFP_exu1_st9_0007.tab.txt	1	3	61	NA	42	0.809	50	0.926	0.84	46	NA
MS2/MCP	bcdGFP-exu1_st9	2015-07-30	Profiler (radius=10) : bcdGFP_exu1_st9_0013.tab.txt	2	1	11	NA	144	0.95	156	0.907	0.923077	150	NA
MS2/MCP	bcdGFP-exu1_st9	2015-07-30	Profiler (radius=10) : bcdGFP_exu1_st9_0013.tab.txt	2	1	14	NA	127	0.848	121	0.884	1.04959	124	NA
MS2/MCP	bcdGFP-exu1_st9	2015-07-30	Profiler (radius=10) : bcdGFP_exu1_st9_0013.tab.txt	2	1	20	NA	115	0.96	84	0.926	1.36905	99.5	NA
MS2/MCP	bcdGFP-exu1_st9	2015-07-30	Profiler (radius=10) : bcdGFP_exu1_st9_0013.tab.txt	2	1	22	NA	92	0.953	99	0.956	0.929293	95.5	NA
MS2/MCP	bcdGFP-exu1_st9	2015-07-30	Profiler (radius=10) : bcdGFP_exu1_st9_0013.tab.txt	2	1	31	NA	160	0.949	97	0.842	1.64948	128.5	NA
MS2/MCP	bcdGFP-exu1_st9	2015-07-30	Profiler (radius=10) : bcdGFP_exu1_st9_0013.tab.txt	2	1	32	NA	101	0.949	116	0.988	0.87069	108.5	NA
MS2/MCP	bcdGFP-exu1_st9	2015-07-30	Profiler (radius=10) : bcdGFP_exu1_st9_0013.tab.txt	2	1	35	NA	89	0.954	94	0.98	0.946809	91.5	NA
MS2/MCP	bcdGFP-exu1_st9	2015-07-30	Profiler (radius=10) : bcdGFP_exu1_st9_0013.tab.txt	2	1	46	NA	111	0.906	145	0.955	0.765517	128	NA
MS2/MCP	bcdGFP-exu1_st9	2015-07-30	Profiler (radius=10) : bcdGFP_exu1_st9_0013.tab.txt	2	1	53	NA	112	0.834	94	0.922	1.19149	103	NA
MS2/MCP	bcdGFP-exu1_st9	2015-07-30	Profiler (radius=10) : bcdGFP_exu1_st9_0013.tab.txt	2	1	64	NA	62	0.874	74	0.97	0.837838	68	NA
MS2/MCP	bcdGFP-exu1_st9	2015-07-30	Profiler (radius=10) : bcdGFP_exu1_st9_0016.tab.txt	2	2	7	NA	102	0.898	130	0.884	0.784615	116	NA
MS2/MCP	bcdGFP-exu1_st9	2015-07-30	Profiler (radius=10) : bcdGFP_exu1_st9_0016.tab.txt	2	2	11	NA	112	0.938	90	0.978	1.24444	101	NA
MS2/MCP	bcdGFP-exu1_st9	2015-07-30	Profiler (radius=10) : bcdGFP_exu1_st9_0016.tab.txt	2	2	17	NA	88	0.962	147	0.96	0.598639	117.5	NA
MS2/MCP	bcdGFP-exu1_st9	2015-07-30	Profiler (radius=10) : bcdGFP_exu1_st9_0016.tab.txt	2	2	20	NA	90	0.95	107	0.975	0.841121	98.5	NA
MS2/MCP	bcdGFP-exu1_st9	2015-07-30	Profiler (radius=10) : bcdGFP_exu1_st9_0016.tab.txt	2	2	21	NA	184	0.974	167	0.957	1.1018	175.5	NA
MS2/MCP	bcdGFP-exu1_st9	2015-07-30	Profiler (radius=10) : bcdGFP_exu1_st9_0016.tab.txt	2	2	24	NA	132	0.961	114	0.947	1.15789	123	NA
MS2/MCP	bcdGFP-exu1_st9	2015-07-30	Profiler (radius=10) : bcdGFP_exu1_st9_0016.tab.txt	2	2	27	NA	100	0.933	62	0.953	1.6129	81	NA
MS2/MCP	bcdGFP-exu1_st9	2015-07-30	Profiler (radius=10) : bcdGFP_exu1_st9_0016.tab.txt	2	2	28	NA	94	0.97	156	0.979	0.602564	125	NA
MS2/MCP	bcdGFP-exu1_st9	2015-07-30	Profiler (radius=10) : bcdGFP_exu1_st9_0016.tab.txt	2	2	32	NA	64	0.946	125	0.968	0.512	94.5	NA
MS2/MCP	bcdGFP-exu1_st9	2015-07-30	Profiler (radius=10) : bcdGFP_exu1_st9_0016.tab.txt	2	2	38	NA	100	0.929	90	0.919	1.11111	95	NA
MS2/MCP	bcdGFP-exu1_st9	2015-07-30	Profiler (radius=10) : bcdGFP_exu1_st9_0016.tab.txt	2	2	45	NA	92	0.971	101	0.88	0.910891	96.5	NA
MS2/MCP	bcdGFP-exu1_st9	2015-07-30	Profiler (radius=10) : bcdGFP_exu1_st9_0016.tab.txt	2	2	66	NA	102	0.847	89	0.908	1.14607	95.5	NA
MS2/MCP	bcdGFP-exu1_st9	2015-07-30	Profiler (radius=10) : bcdGFP_exu1_st9_0016.tab.txt	2	2	72	NA	71	0.945	66	0.845	1.07576	68.5	NA
MS2/MCP	bcdGFP-exu1_st9	2015-07-30	Profiler (radius=10) : bcdGFP_exu1_st9_0016.tab.txt	2	2	81	NA	38	0.854	72	0.832	0.527778	55	NA
MS2/MCP	bcdGFP-exu1_st9	2015-07-30	Profiler (radius=10) : bcdGFP_exu1_st9_0016.tab.txt	2	2	84	NA	98	0.957	88	0.922	1.11364	93	NA
MS2/MCP	bcdGFP-exu1_st9	2015-07-30	Profiler (radius=10) : bcdGFP_exu1_st9_0018.tab.txt	2	3	3	NA	147	0.801	94	0.973	1.56383	120.5	NA
MS2/MCP	bcdGFP-exu1_st9	2015-07-30	Profiler (radius=10) : bcdGFP_exu1_st9_0018.tab.txt	2	3	5	NA	138	0.971	147	0.961	0.938776	142.5	NA
MS2/MCP	bcdGFP-exu1_st9	2015-07-30	Profiler (radius=10) : bcdGFP_exu1_st9_0018.tab.txt	2	3	10	NA	114	0.858	74	0.814	1.54054	94	NA
MS2/MCP	bcdGFP-exu1_st9	2015-07-30	Profiler (radius=10) : bcdGFP_exu1_st9_0018.tab.txt	2	3	18	NA	84	0.946	113	0.961	0.743363	98.5	NA
MS2/MCP	bcdGFP-exu1_st9	2015-07-30	Profiler (radius=10) : bcdGFP_exu1_st9_0018.tab.txt	2	3	28	NA	122	0.968	72	0.938	1.69444	97	NA
MS2/MCP	bcdGFP-exu1_st9	2015-07-30	Profiler (radius=10) : bcdGFP_exu1_st9_0018.tab.txt	2	3	29	NA	123	0.877	83	0.943	1.48193	103	NA
MS2/MCP	bcdGFP-exu1_st9	2015-07-30	Profiler (radius=10) : bcdGFP_exu1_st9_0018.tab.txt	2	3	38	NA	150	0.893	85	0.948	1.76471	117.5	NA
MS2/MCP	bcdGFP-exu1_st9	2015-07-30	Profiler (radius=10) : bcdGFP_exu1_st9_0018.tab.txt	2	3	39	NA	79	0.924	116	0.824	0.681034	97.5	NA
MS2/MCP	bcdGFP-exu1_st9	2015-07-30	Profiler (radius=10) : bcdGFP_exu1_st9_0018.tab.txt	2	3	42	NA	97	0.911	52	0.831	1.86538	74.5	NA
MS2/MCP	bcdGFP-exu1_st9	2015-07-30	Profiler (radius=10) : bcdGFP_exu1_st9_0018.tab.txt	2	3	45	NA	112	0.934	102	0.945	1.09804	107	NA
MS2/MCP	bcdGFP-exu1_st9	2015-07-30	Profiler (radius=10) : bcdGFP_exu1_st9_0018.tab.txt	2	3	47	NA	95	0.817	88	0.941	1.07955	91.5	NA
MS2/MCP	bcdGFP-exu1_st9	2015-07-30	Profiler (radius=10) : bcdGFP_exu1_st9_0018.tab.txt	2	3	48	NA	77	0.91	57	0.933	1.35088	67	NA
MS2/MCP	bcdGFP-exu1_st9	2015-07-30	Profiler (radius=10) : bcdGFP_exu1_st9_0018.tab.txt	2	3	54	NA	41	0.842	65	0.8	0.630769	53	NA
MS2/MCP	bcdGFP-exu1_st9	2015-07-30	Profiler (radius=10) : bcdGFP_exu1_st9_0018.tab.txt	2	3	55	NA	128	0.909	112	0.861	1.14286	120	NA
MS2/MCP	bcdGFP-exu1_st9	2015-07-30	Profiler (radius=10) : bcdGFP_exu1_st9_0018.tab.txt	2	3	58	NA	90	0.885	110	0.942	0.818182	100	NA
MS2/MCP	bcdGFP-exu1_st9	2015-07-30	Profiler (radius=10) : bcdGFP_exu1_st9_0018.tab.txt	2	3	61	NA	94	0.823	85	0.944	1.10588	89.5	NA
MS2/MCP	bcdGFP-exu1_st9	2015-07-30	Profiler (radius=10) : bcdGFP_exu1_st9_0021.tab.txt	3	1	1	NA	161	0.934	117	0.952	1.37607	139	NA
MS2/MCP	bcdGFP-exu1_st9	2015-07-30	Profiler (radius=10) : bcdGFP_exu1_st9_0021.tab.txt	3	1	3	NA	128	0.968	92	0.986	1.3913	110	NA
MS2/MCP	bcdGFP-exu1_st9	2015-07-30	Profiler (radius=10) : bcdGFP_exu1_st9_0021.tab.txt	3	1	5	NA	125	0.848	153	0.981	0.816993	139	NA
MS2/MCP	bcdGFP-exu1_st9	2015-07-30	Profiler (radius=10) : bcdGFP_exu1_st9_0021.tab.txt	3	1	8	NA	118	0.989	119	0.948	0.991597	118.5	NA
MS2/MCP	bcdGFP-exu1_st9	2015-07-30	Profiler (radius=10) : bcdGFP_exu1_st9_0021.tab.txt	3	1	10	NA	133	0.932	159	0.936	0.836478	146	NA
MS2/MCP	bcdGFP-exu1_st9	2015-07-30	Profiler (radius=10) : bcdGFP_exu1_st9_0021.tab.txt	3	1	11	NA	144	0.978	127	0.98	1.13386	135.5	NA
MS2/MCP	bcdGFP-exu1_st9	2015-07-30	Profiler (radius=10) : bcdGFP_exu1_st9_0021.tab.txt	3	1	17	NA	200	0.984	110	0.983	1.81818	155	NA
MS2/MCP	bcdGFP-exu1_st9	2015-07-30	Profiler (radius=10) : bcdGFP_exu1_st9_0021.tab.txt	3	1	19	NA	104	0.984	98	0.831	1.06122	101	NA
MS2/MCP	bcdGFP-exu1_st9	2015-07-30	Profiler (radius=10) : bcdGFP_exu1_st9_0021.tab.txt	3	1	21	NA	125	0.987	95	0.922	1.31579	110	NA
MS2/MCP	bcdGFP-exu1_st9	2015-07-30	Profiler (radius=10) : bcdGFP_exu1_st9_0021.tab.txt	3	1	24	NA	129	0.955	107	0.965	1.20561	118	NA
MS2/MCP	bcdGFP-exu1_st9	2015-07-30	Profiler (radius=10) : bcdGFP_exu1_st9_0021.tab.txt	3	1	27	NA	78	0.932	82	0.904	0.95122	80	NA
MS2/MCP	bcdGFP-exu1_st9	2015-07-30	Profiler (radius=10) : bcdGFP_exu1_st9_0021.tab.txt	3	1	28	NA	86	0.977	111	0.878	0.774775	98.5	NA
MS2/MCP	bcdGFP-exu1_st9	2015-07-30	Profiler (radius=10) : bcdGFP_exu1_st9_0021.tab.txt	3	1	30	NA	139	0.978	96	0.889	1.44792	117.5	NA
MS2/MCP	bcdGFP-exu1_st9	2015-07-30	Profiler (radius=10) : bcdGFP_exu1_st9_0021.tab.txt	3	1	33	NA	75	0.893	114	0.843	0.657895	94.5	NA
MS2/MCP	bcdGFP-exu1_st9	2015-07-30	Profiler (radius=10) : bcdGFP_exu1_st9_0021.tab.txt	3	1	35	NA	120	0.892	131	0.933	0.916031	125.5	NA
MS2/MCP	bcdGFP-exu1_st9	2015-07-30	Profiler (radius=10) : bcdGFP_exu1_st9_0021.tab.txt	3	1	36	NA	84	0.984	90	0.887	0.933333	87	NA
MS2/MCP	bcdGFP-exu1_st9	2015-07-30	Profiler (radius=10) : bcdGFP_exu1_st9_0021.tab.txt	3	1	39	NA	92	0.961	135	0.934	0.681481	113.5	NA
MS2/MCP	bcdGFP-exu1_st9	2015-07-30	Profiler (radius=10) : bcdGFP_exu1_st9_0021.tab.txt	3	1	42	NA	66	0.967	73	0.97	0.90411	69.5	NA
MS2/MCP	bcdGFP-exu1_st9	2015-07-30	Profiler (radius=10) : bcdGFP_exu1_st9_0021.tab.txt	3	1	45	NA	114	0.92	65	0.908	1.75385	89.5	NA
MS2/MCP	bcdGFP-exu1_st9	2015-07-30	Profiler (radius=10) : bcdGFP_exu1_st9_0021.tab.txt	3	1	46	NA	110	0.864	104	0.954	1.05769	107	NA
MS2/MCP	bcdGFP-exu1_st9	2015-07-30	Profiler (radius=10) : bcdGFP_exu1_st9_0021.tab.txt	3	1	52	NA	83	0.892	107	0.963	0.775701	95	NA
MS2/MCP	bcdGFP-exu1_st9	2015-07-30	Profiler (radius=10) : bcdGFP_exu1_st9_0021.tab.txt	3	1	53	NA	179	0.906	140	0.908	1.27857	159.5	NA
MS2/MCP	bcdGFP-exu1_st9	2015-07-30	Profiler (radius=10) : bcdGFP_exu1_st9_0021.tab.txt	3	1	55	NA	121	0.985	157	0.911	0.770701	139	NA
MS2/MCP	bcdGFP-exu1_st9	2015-07-30	Profiler (radius=10) : bcdGFP_exu1_st9_0021.tab.txt	3	1	56	NA	65	0.857	87	0.819	0.747126	76	NA
MS2/MCP	bcdGFP-exu1_st9	2015-07-30	Profiler (radius=10) : bcdGFP_exu1_st9_0021.tab.txt	3	1	60	NA	86	0.815	87	0.964	0.988506	86.5	NA
MS2/MCP	bcdGFP-exu1_st9	2015-07-30	Profiler (radius=10) : bcdGFP_exu1_st9_0021.tab.txt	3	1	62	NA	118	0.843	83	0.957	1.42169	100.5	NA
MS2/MCP	bcdGFP-exu1_st9	2015-07-30	Profiler (radius=10) : bcdGFP_exu1_st9_0021.tab.txt	3	1	75	NA	71	0.934	50	0.841	1.42	60.5	NA
MS2/MCP	bcdGFP-exu1_st9	2015-07-30	Profiler (radius=10) : bcdGFP_exu1_st9_0021.tab.txt	3	1	82	NA	84	0.881	66	0.876	1.27273	75	NA
MS2/MCP	bcdGFP-exu1_st9	2015-07-30	Profiler (radius=10) : bcdGFP_exu1_st9_0021.tab.txt	3	1	83	NA	139	0.952	119	0.906	1.16807	129	NA
MS2/MCP	bcdGFP-exu1_st9	2015-07-30	Profiler (radius=10) : bcdGFP_exu1_st9_0021.tab.txt	3	1	91	NA	89	0.938	88	0.924	1.01136	88.5	NA
MS2/MCP	bcdGFP-exu1_st9	2015-07-30	Profiler (radius=10) : bcdGFP_exu1_st9_0021.tab.txt	3	1	93	NA	46	0.868	81	0.924	0.567901	63.5	NA
MS2/MCP	bcdGFP-exu1_st9	2015-07-30	Profiler (radius=10) : bcdGFP_exu1_st9_0021.tab.txt	3	1	94	NA	77	0.968	127	0.846	0.606299	102	NA
MS2/MCP	bcdGFP-exu1_st9	2015-07-30	Profiler (radius=10) : bcdGFP_exu1_st9_0021.tab.txt	3	1	95	NA	111	0.913	154	0.954	0.720779	132.5	NA
MS2/MCP	bcdGFP-exu1_st9	2015-07-30	Profiler (radius=10) : bcdGFP_exu1_st9_0021.tab.txt	3	1	100	NA	76	0.869	61	0.952	1.2459	68.5	NA
MS2/MCP	bcdGFP-exu1_st9	2015-07-30	Profiler (radius=10) : bcdGFP_exu1_st9_0021.tab.txt	3	1	102	NA	118	0.947	206	0.922	0.572816	162	NA
MS2/MCP	bcdGFP-exu1_st9	2015-07-30	Profiler (radius=10) : bcdGFP_exu1_st9_0021.tab.txt	3	1	104	NA	66	0.828	98	0.808	0.673469	82	NA
MS2/MCP	bcdGFP-exu1_st9	2015-07-30	Profiler (radius=10) : bcdGFP_exu1_st9_0021.tab.txt	3	1	105	NA	82	0.867	87	0.952	0.942529	84.5	NA
MS2/MCP	bcdGFP-exu1_st9	2015-07-30	Profiler (radius=10) : bcdGFP_exu1_st9_0021.tab.txt	3	1	107	NA	50	0.887	82	0.904	0.609756	66	NA
MS2/MCP	bcdGFP-exu1_st9	2015-07-30	Profiler (radius=10) : bcdGFP_exu1_st9_0021.tab.txt	3	1	114	NA	151	0.891	193	0.932	0.782383	172	NA
MS2/MCP	bcdGFP-exu1_st9	2015-07-30	Profiler (radius=10) : bcdGFP_exu1_st9_0021.tab.txt	3	1	115	NA	112	0.832	192	0.972	0.583333	152	NA
MS2/MCP	bcdGFP-exu1_st9	2015-07-30	Profiler (radius=10) : bcdGFP_exu1_st9_0021.tab.txt	3	1	117	NA	66	0.825	64	0.941	1.03125	65	NA
MS2/MCP	bcdGFP-exu1_st9	2015-07-30	Profiler (radius=10) : bcdGFP_exu1_st9_0021.tab.txt	3	1	136	NA	91	0.875	93	0.883	0.978495	92	NA
MS2/MCP	bcdGFP-exu1_st9	2015-07-30	Profiler (radius=10) : bcdGFP_exu1_st9_0024.tab.txt	3	2	1	NA	143	0.884	119	0.924	1.20168	131	NA
MS2/MCP	bcdGFP-exu1_st9	2015-07-30	Profiler (radius=10) : bcdGFP_exu1_st9_0024.tab.txt	3	2	4	NA	127	0.94	155	0.904	0.819355	141	NA
MS2/MCP	bcdGFP-exu1_st9	2015-07-30	Profiler (radius=10) : bcdGFP_exu1_st9_0024.tab.txt	3	2	5	NA	180	0.889	120	0.939	1.5	150	NA
MS2/MCP	bcdGFP-exu1_st9	2015-07-30	Profiler (radius=10) : bcdGFP_exu1_st9_0024.tab.txt	3	2	20	NA	118	0.912	60	0.872	1.96667	89	NA
MS2/MCP	bcdGFP-exu1_st9	2015-07-30	Profiler (radius=10) : bcdGFP_exu1_st9_0024.tab.txt	3	2	23	NA	80	0.89	131	0.822	0.610687	105.5	NA
MS2/MCP	bcdGFP-exu1_st9	2015-07-30	Profiler (radius=10) : bcdGFP_exu1_st9_0024.tab.txt	3	2	25	NA	123	0.953	74	0.906	1.66216	98.5	NA
MS2/MCP	bcdGFP-exu1_st9	2015-07-30	Profiler (radius=10) : bcdGFP_exu1_st9_0024.tab.txt	3	2	41	NA	103	0.894	87	0.875	1.18391	95	NA
MS2/MCP	bcdGFP-exu1_st9	2015-07-30	Profiler (radius=10) : bcdGFP_exu1_st9_0024.tab.txt	3	2	51	NA	78	0.964	112	0.944	0.696429	95	NA
MS2/MCP	bcdGFP-exu1_st9	2015-07-30	Profiler (radius=10) : bcdGFP_exu1_st9_0024.tab.txt	3	2	55	NA	150	0.936	100	0.878	1.5	125	NA
MS2/MCP	bcdGFP-exu1_st9	2015-07-30	Profiler (radius=10) : bcdGFP_exu1_st9_0024.tab.txt	3	2	59	NA	135	0.918	87	0.846	1.55172	111	NA
MS2/MCP	bcdGFP-exu1_st9	2015-07-30	Profiler (radius=10) : bcdGFP_exu1_st9_0024.tab.txt	3	2	62	NA	101	0.832	109	0.94	0.926606	105	NA
MS2/MCP	bcdGFP-exu1_st9	2015-07-30	Profiler (radius=10) : bcdGFP_exu1_st9_0024.tab.txt	3	2	65	NA	56	0.922	60	0.832	0.933333	58	NA
MS2/MCP	bcdGFP-exu1_st9	2015-07-30	Profiler (radius=10) : bcdGFP_exu1_st9_0024.tab.txt	3	2	73	NA	72	0.938	104	0.952	0.692308	88	NA
MS2/MCP	bcdGFP-exu1_st9	2015-07-30	Profiler (radius=10) : bcdGFP_exu1_st9_0024.tab.txt	3	2	77	NA	158	0.902	116	0.859	1.36207	137	NA
MS2/MCP	bcdGFP-exu1_st9	2015-07-30	Profiler (radius=10) : bcdGFP_exu1_st9_0027.tab.txt	3	3	3	NA	127	0.812	99	0.971	1.28283	113	NA
MS2/MCP	bcdGFP-exu1_st9	2015-07-30	Profiler (radius=10) : bcdGFP_exu1_st9_0027.tab.txt	3	3	4	NA	89	0.834	90	0.965	0.988889	89.5	NA
MS2/MCP	bcdGFP-exu1_st9	2015-07-30	Profiler (radius=10) : bcdGFP_exu1_st9_0027.tab.txt	3	3	5	NA	122	0.945	114	0.945	1.07018	118	NA
MS2/MCP	bcdGFP-exu1_st9	2015-07-30	Profiler (radius=10) : bcdGFP_exu1_st9_0027.tab.txt	3	3	6	NA	121	0.811	120	0.937	1.00833	120.5	NA
MS2/MCP	bcdGFP-exu1_st9	2015-07-30	Profiler (radius=10) : bcdGFP_exu1_st9_0027.tab.txt	3	3	8	NA	78	0.833	81	0.814	0.962963	79.5	NA
MS2/MCP	bcdGFP-exu1_st9	2015-07-30	Profiler (radius=10) : bcdGFP_exu1_st9_0027.tab.txt	3	3	17	NA	101	0.919	88	0.978	1.14773	94.5	NA
MS2/MCP	bcdGFP-exu1_st9	2015-07-30	Profiler (radius=10) : bcdGFP_exu1_st9_0027.tab.txt	3	3	22	NA	121	0.884	147	0.893	0.823129	134	NA
MS2/MCP	bcdGFP-exu1_st9	2015-07-30	Profiler (radius=10) : bcdGFP_exu1_st9_0027.tab.txt	3	3	26	NA	127	0.876	138	0.906	0.92029	132.5	NA
MS2/MCP	bcdGFP-exu1_st9	2015-07-30	Profiler (radius=10) : bcdGFP_exu1_st9_0027.tab.txt	3	3	28	NA	85	0.863	66	0.848	1.28788	75.5	NA
MS2/MCP	bcdGFP-exu1_st9	2015-07-30	Profiler (radius=10) : bcdGFP_exu1_st9_0027.tab.txt	3	3	31	NA	70	0.862	89	0.943	0.786517	79.5	NA
MS2/MCP	bcdGFP-exu1_st9	2015-07-30	Profiler (radius=10) : bcdGFP_exu1_st9_0027.tab.txt	3	3	33	NA	51	0.89	84	0.955	0.607143	67.5	NA
MS2/MCP	bcdGFP-exu1_st9	2015-07-30	Profiler (radius=10) : bcdGFP_exu1_st9_0027.tab.txt	3	3	34	NA	110	0.831	80	0.895	1.375	95	NA
MS2/MCP	bcdGFP_st14_isolate	2015-06-29	Profiler (radius=10, n=0) : bcdGFP_St14_0012.tab.txt	2	1	9	1.526	146	0.968	108	0.8	1.35185	127	NA
MS2/MCP	bcdGFP_st14_isolate	2015-06-29	Profiler (radius=10, n=0) : bcdGFP_St14_0012.tab.txt	2	1	56	1.718	103	0.967	148	0.913	0.695946	125.5	NA
MS2/MCP	bcdGFP_st14_isolate	2015-06-29	Profiler (radius=10, n=0) : bcdGFP_St14_0012.tab.txt	2	1	61	1.545	108	0.842	102	0.843	1.05882	105	NA
MS2/MCP	bcdGFP_st14_isolate	2015-06-29	Profiler (radius=10, n=0) : bcdGFP_St14_0012.tab.txt	2	1	71	1.711	206	0.985	146	0.968	1.41096	176	NA
MS2/MCP	bcdGFP_st14_isolate	2015-06-29	Profiler (radius=10, n=0) : bcdGFP_St14_0012.tab.txt	2	1	100	4.248	126	0.966	85	0.933	1.48235	105.5	NA
MS2/MCP	bcdGFP_st14_isolate	2015-06-29	Profiler (radius=10, n=0) : bcdGFP_St14_0012.tab.txt	2	1	105	2.637	135	0.988	174	0.925	0.775862	154.5	NA
MS2/MCP	bcdGFP_st14_isolate	2015-06-29	Profiler (radius=10, n=0) : bcdGFP_St14_0012.tab.txt	2	1	194	5.111	94	0.865	113	0.911	0.831858	103.5	NA
MS2/MCP	bcdGFP_st14_isolate	2015-06-29	Profiler (radius=10, n=0) : bcdGFP_St14_0012.tab.txt	2	1	204	0.563	103	0.92	127	0.898	0.811024	115	NA
MS2/MCP	bcdGFP_st14_isolate	2015-06-29	Profiler (radius=10, n=0) : bcdGFP_St14_0012.tab.txt	2	1	249	6.49	60	0.802	69	0.844	0.869565	64.5	NA
MS2/MCP	bcdGFP_st14_isolate	2015-06-29	Profiler (radius=10, n=0) : bcdGFP_St14_0012.tab.txt	2	1	261	8.075	105	0.85	67	0.892	1.56716	86	NA
MS2/MCP	bcdGFP_st14_isolate	2015-06-29	Profiler (radius=10, n=0) : bcdGFP_St14_0012.tab.txt	2	1	278	7.406	185	0.92	120	0.941	1.54167	152.5	NA
MS2/MCP	bcdGFP_st14_isolate	2015-06-29	Profiler (radius=10, n=0) : bcdGFP_St14_0016.tab.txt	2	2	17	NA	103	0.902	128	0.974	0.804688	115.5	NA
MS2/MCP	bcdGFP_st14_isolate	2015-06-29	Profiler (radius=10, n=0) : bcdGFP_St14_0016.tab.txt	2	2	19	NA	116	0.978	77	0.927	1.50649	96.5	NA
MS2/MCP	bcdGFP_st14_isolate	2015-06-29	Profiler (radius=10, n=0) : bcdGFP_St14_0016.tab.txt	2	2	25	NA	126	0.924	191	0.975	0.659686	158.5	NA
MS2/MCP	bcdGFP_st14_isolate	2015-06-29	Profiler (radius=10, n=0) : bcdGFP_St14_0016.tab.txt	2	2	32	NA	188	0.859	104	0.9	1.80769	146	NA
MS2/MCP	bcdGFP_st14_isolate	2015-06-29	Profiler (radius=10, n=0) : bcdGFP_St14_0016.tab.txt	2	2	37	NA	161	0.955	122	0.979	1.31967	141.5	NA
MS2/MCP	bcdGFP_st14_isolate	2015-06-29	Profiler (radius=10, n=0) : bcdGFP_St14_0016.tab.txt	2	2	69	NA	94	0.9	112	0.99	0.839286	103	NA
MS2/MCP	bcdGFP_st14_isolate	2015-06-29	Profiler (radius=10, n=0) : bcdGFP_St14_0016.tab.txt	2	2	77	NA	110	0.952	89	0.954	1.23596	99.5	NA
MS2/MCP	bcdGFP_st14_isolate	2015-06-29	Profiler (radius=10, n=0) : bcdGFP_St14_0016.tab.txt	2	2	102	NA	98	0.975	159	0.956	0.616352	128.5	NA
MS2/MCP	bcdGFP_st14_isolate	2015-06-29	Profiler (radius=10, n=0) : bcdGFP_St14_0016.tab.txt	2	2	106	NA	109	0.923	147	0.913	0.741497	128	NA
MS2/MCP	bcdGFP_st14_isolate	2015-06-29	Profiler (radius=10, n=0) : bcdGFP_St14_0016.tab.txt	2	2	119	NA	135	0.803	122	0.975	1.10656	128.5	NA
MS2/MCP	bcdGFP_st14_isolate	2015-06-29	Profiler (radius=10, n=0) : bcdGFP_St14_0016.tab.txt	2	2	148	NA	80	0.894	84	0.83	0.952381	82	NA
MS2/MCP	bcdGFP_st14_isolate	2015-06-29	Profiler (radius=10, n=0) : bcdGFP_St14_0016.tab.txt	2	2	156	NA	57	0.874	112	0.84	0.508929	84.5	NA
MS2/MCP	bcdGFP_st14_isolate	2015-06-29	Profiler (radius=10, n=0) : bcdGFP_St14_0016.tab.txt	2	2	195	NA	128	0.882	102	0.903	1.2549	115	NA
MS2/MCP	bcdGFP_st14_isolate	2015-06-29	Profiler (radius=10, n=0) : bcdGFP_St14_0016.tab.txt	2	2	220	NA	76	0.854	74	0.95	1.02703	75	NA
MS2/MCP	bcdGFP_st14_isolate	2015-06-29	Profiler (radius=10, n=0) : bcdGFP_St14_0016.tab.txt	2	2	227	NA	61	0.889	75	0.929	0.813333	68	NA
MS2/MCP	bcdGFP_st14_isolate	2015-06-29	Profiler (radius=10, n=0) : bcdGFP_St14_0016.tab.txt	2	2	245	NA	112	0.949	64	0.88	1.75	88	NA
MS2/MCP	bcdGFP_st14_isolate	2015-06-29	Profiler (radius=10, n=0) : bcdGFP_St14_0016.tab.txt	2	2	267	NA	64	0.868	59	0.906	1.08475	61.5	NA
MS2/MCP	bcdGFP_st14_isolate	2015-06-29	Profiler (radius=10, n=0) : bcdGFP_St14_0016.tab.txt	2	2	268	NA	63	0.864	40	0.818	1.575	51.5	NA
MS2/MCP	bcdGFP_st14_isolate	2015-06-29	Profiler (radius=10, n=0) : bcdGFP_St14_0016.tab.txt	2	2	269	NA	50	0.899	54	0.845	0.925926	52	NA
MS2/MCP	bcdGFP_st14_isolate	2015-06-29	Profiler (radius=10, n=0) : bcdGFP_St14_0016.tab.txt	2	2	275	NA	126	0.954	93	0.923	1.35484	109.5	NA
MS2/MCP	bcdGFP_st14_isolate	2015-06-29	Profiler (radius=10, n=0) : bcdGFP_St14_0016.tab.txt	2	2	276	NA	85	0.915	54	0.882	1.57407	69.5	NA
MS2/MCP	bcdGFP_st14_isolate	2015-06-29	Profiler (radius=10, n=0) : bcdGFP_St14_0016.tab.txt	2	2	283	NA	105	0.957	153	0.876	0.686275	129	NA
MS2/MCP	bcdGFP_st14_isolate	2015-06-29	Profiler (radius=10, n=0) : bcdGFP_St14_0016.tab.txt	2	2	297	NA	59	0.859	86	0.935	0.686047	72.5	NA
MS2/MCP	bcdGFP_st14_isolate	2015-06-29	Profiler (radius=10, n=0) : bcdGFP_St14_0016.tab.txt	2	2	299	NA	132	0.897	71	0.949	1.85915	101.5	NA
MS2/MCP	bcdGFP_st14_isolate	2015-06-29	Profiler (radius=10, n=0) : bcdGFP_St14_0016.tab.txt	2	2	307	NA	72	0.882	82	0.936	0.878049	77	NA
MS2/MCP	bcdGFP_st14_isolate	2015-06-29	Profiler (radius=10, n=0) : bcdGFP_St14_0016.tab.txt	2	2	322	NA	49	0.846	51	0.893	0.960784	50	NA
MS2/MCP	bcdGFP_st14_isolate	2015-06-29	Profiler (radius=10, n=0) : bcdGFP_St14_0018.tab.txt	2	3	2	3.673	113	0.867	91	0.963	1.24176	102	NA
MS2/MCP	bcdGFP_st14_isolate	2015-06-29	Profiler (radius=10, n=0) : bcdGFP_St14_0018.tab.txt	2	3	9	3.665	107	0.947	99	0.868	1.08081	103	NA
MS2/MCP	bcdGFP_st14_isolate	2015-06-29	Profiler (radius=10, n=0) : bcdGFP_St14_0018.tab.txt	2	3	13	1.351	127	0.912	123	0.917	1.03252	125	NA
MS2/MCP	bcdGFP_st14_isolate	2015-06-29	Profiler (radius=10, n=0) : bcdGFP_St14_0018.tab.txt	2	3	15	4.045	91	0.924	126	0.922	0.722222	108.5	NA
MS2/MCP	bcdGFP_st14_isolate	2015-06-29	Profiler (radius=10, n=0) : bcdGFP_St14_0018.tab.txt	2	3	17	4.543	67	0.97	64	0.952	1.04688	65.5	NA
MS2/MCP	bcdGFP_st14_isolate	2015-06-29	Profiler (radius=10, n=0) : bcdGFP_St14_0018.tab.txt	2	3	30	4.401	74	0.959	55	0.968	1.34545	64.5	NA
MS2/MCP	bcdGFP_st14_isolate	2015-06-29	Profiler (radius=10, n=0) : bcdGFP_St14_0018.tab.txt	2	3	79	4.739	124	0.85	115	0.827	1.07826	119.5	NA
MS2/MCP	bcdGFP_st14_isolate	2015-06-29	Profiler (radius=10, n=0) : bcdGFP_St14_0018.tab.txt	2	3	196	6.899	53	0.893	85	0.936	0.623529	69	NA
MS2/MCP	bcdGFP_st14_isolate	2015-06-29	Profiler (radius=10, n=0) : bcdGFP_St14_0018.tab.txt	2	3	199	6.916	43	0.8	45	0.886	0.955556	44	NA
MS2/MCP	bcdGFP_st14_isolate	2015-06-29	Profiler (radius=10, n=0) : bcdGFP_St14_0018.tab.txt	2	3	202	5.972	73	0.908	62	0.84	1.17742	67.5	NA
MS2/MCP	bcdGFP_st14_isolate	2015-06-29	Profiler (radius=10, n=0) : bcdGFP_St14_0027.tab.txt	3	1	21	NA	151	0.968	115	0.811	1.31304	133	NA
MS2/MCP	bcdGFP_st14_isolate	2015-06-29	Profiler (radius=10, n=0) : bcdGFP_St14_0027.tab.txt	3	1	31	NA	69	0.854	64	0.969	1.07812	66.5	NA
MS2/MCP	bcdGFP_st14_isolate	2015-06-29	Profiler (radius=10, n=0) : bcdGFP_St14_0027.tab.txt	3	1	33	NA	78	0.926	71	0.884	1.09859	74.5	NA
MS2/MCP	bcdGFP_st14_isolate	2015-06-29	Profiler (radius=10, n=0) : bcdGFP_St14_0027.tab.txt	3	1	69	NA	154	0.958	113	0.947	1.36283	133.5	NA
MS2/MCP	bcdGFP_st14_isolate	2015-06-29	Profiler (radius=10, n=0) : bcdGFP_St14_0027.tab.txt	3	1	86	NA	66	0.865	84	0.822	0.785714	75	NA
MS2/MCP	bcdGFP_st14_isolate	2015-06-29	Profiler (radius=10, n=0) : bcdGFP_St14_0027.tab.txt	3	1	125	NA	48	0.843	71	0.846	0.676056	59.5	NA
MS2/MCP	bcdGFP_st14_isolate	2015-06-29	Profiler (radius=10, n=0) : bcdGFP_St14_0031.tab.txt	3	2	18	NA	84	0.888	99	0.959	0.848485	91.5	NA
MS2/MCP	bcdGFP_st14_isolate	2015-06-29	Profiler (radius=10, n=0) : bcdGFP_St14_0031.tab.txt	3	2	29	NA	109	0.968	84	0.985	1.29762	96.5	NA
MS2/MCP	bcdGFP_st14_isolate	2015-06-29	Profiler (radius=10, n=0) : bcdGFP_St14_0035.tab.txt	3	2	5	NA	110	0.958	152	0.943	0.723684	131	NA
MS2/MCP	bcdGFP_st14_isolate	2015-06-29	Profiler (radius=10, n=0) : bcdGFP_St14_0035.tab.txt	3	2	10	NA	83	0.93	122	0.978	0.680328	102.5	NA
MS2/MCP	bcdGFP_st14_isolate	2015-06-29	Profiler (radius=10, n=0) : bcdGFP_St14_0035.tab.txt	3	2	18	NA	146	0.853	100	0.975	1.46	123	NA
MS2/MCP	bcdGFP_st14_isolate	2015-06-29	Profiler (radius=10, n=0) : bcdGFP_St14_0035.tab.txt	3	2	24	NA	146	0.982	130	0.941	1.12308	138	NA
MS2/MCP	bcdGFP_st14_isolate	2015-06-29	Profiler (radius=10, n=0) : bcdGFP_St14_0035.tab.txt	3	2	25	NA	88	0.976	127	0.88	0.692913	107.5	NA
MS2/MCP	bcdGFP_st14_isolate	2015-06-29	Profiler (radius=10, n=0) : bcdGFP_St14_0035.tab.txt	3	2	34	NA	64	0.959	119	0.876	0.537815	91.5	NA
MS2/MCP	bcdGFP_st14_isolate	2015-06-29	Profiler (radius=10, n=0) : bcdGFP_St14_0038.tab.txt	3	3	11	NA	137	0.96	144	0.984	0.951389	140.5	NA
MS2/MCP	bcdGFP_st14_isolate	2015-06-29	Profiler (radius=10, n=0) : bcdGFP_St14_0038.tab.txt	3	3	27	NA	136	0.991	119	0.927	1.14286	127.5	NA
MS2/MCP	bcdGFP_st14_isolate	2015-06-29	Profiler (radius=10, n=0) : bcdGFP_St14_0038.tab.txt	3	3	72	NA	85	0.869	164	0.897	0.518293	124.5	NA
MS2/MCP	bcdGFP_st14_isolate	2015-06-29	Profiler (radius=10, n=0) : bcdGFP_St14_0038.tab.txt	3	3	79	NA	84	0.808	78	0.925	1.07692	81	NA
MS2/MCP	bcdGFP_st14_isolate	2015-06-24	Profiler (radius=10, n=0) : bcdGFP_st14_cacofix_0001.tab.txt	1	1	0	NA	151	0.992	208	0.969	0.725962	179.5	NA
MS2/MCP	bcdGFP_st14_isolate	2015-06-24	Profiler (radius=10, n=0) : bcdGFP_st14_cacofix_0001.tab.txt	1	1	1	NA	124	0.97	154	0.908	0.805195	139	NA
MS2/MCP	bcdGFP_st14_isolate	2015-06-24	Profiler (radius=10, n=0) : bcdGFP_st14_cacofix_0001.tab.txt	1	1	2	NA	136	0.995	123	0.822	1.10569	129.5	NA
MS2/MCP	bcdGFP_st14_isolate	2015-06-24	Profiler (radius=10, n=0) : bcdGFP_st14_cacofix_0001.tab.txt	1	1	4	NA	138	0.98	143	0.984	0.965035	140.5	NA
MS2/MCP	bcdGFP_st14_isolate	2015-06-24	Profiler (radius=10, n=0) : bcdGFP_st14_cacofix_0001.tab.txt	1	1	5	NA	149	0.982	129	0.968	1.15504	139	NA
MS2/MCP	bcdGFP_st14_isolate	2015-06-24	Profiler (radius=10, n=0) : bcdGFP_st14_cacofix_0001.tab.txt	1	1	6	NA	143	0.976	176	0.984	0.8125	159.5	NA
MS2/MCP	bcdGFP_st14_isolate	2015-06-24	Profiler (radius=10, n=0) : bcdGFP_st14_cacofix_0001.tab.txt	1	1	7	NA	115	0.974	121	0.987	0.950413	118	NA
MS2/MCP	bcdGFP_st14_isolate	2015-06-24	Profiler (radius=10, n=0) : bcdGFP_st14_cacofix_0001.tab.txt	1	1	8	NA	108	0.987	124	0.974	0.870968	116	NA
MS2/MCP	bcdGFP_st14_isolate	2015-06-24	Profiler (radius=10, n=0) : bcdGFP_st14_cacofix_0001.tab.txt	1	1	10	NA	156	0.966	153	0.911	1.01961	154.5	NA
MS2/MCP	bcdGFP_st14_isolate	2015-06-24	Profiler (radius=10, n=0) : bcdGFP_st14_cacofix_0001.tab.txt	1	1	11	NA	114	0.953	132	0.978	0.863636	123	NA
MS2/MCP	bcdGFP_st14_isolate	2015-06-24	Profiler (radius=10, n=0) : bcdGFP_st14_cacofix_0001.tab.txt	1	1	14	NA	112	0.969	94	0.846	1.19149	103	NA
MS2/MCP	bcdGFP_st14_isolate	2015-06-24	Profiler (radius=10, n=0) : bcdGFP_st14_cacofix_0001.tab.txt	1	1	16	NA	149	0.974	131	0.915	1.1374	140	NA
MS2/MCP	bcdGFP_st14_isolate	2015-06-24	Profiler (radius=10, n=0) : bcdGFP_st14_cacofix_0001.tab.txt	1	1	17	NA	89	0.852	123	0.934	0.723577	106	NA
MS2/MCP	bcdGFP_st14_isolate	2015-06-24	Profiler (radius=10, n=0) : bcdGFP_st14_cacofix_0001.tab.txt	1	1	19	NA	145	0.905	142	0.93	1.02113	143.5	NA
MS2/MCP	bcdGFP_st14_isolate	2015-06-24	Profiler (radius=10, n=0) : bcdGFP_st14_cacofix_0001.tab.txt	1	1	23	NA	135	0.995	114	0.905	1.18421	124.5	NA
MS2/MCP	bcdGFP_st14_isolate	2015-06-24	Profiler (radius=10, n=0) : bcdGFP_st14_cacofix_0001.tab.txt	1	1	25	NA	86	0.817	100	0.97	0.86	93	NA
MS2/MCP	bcdGFP_st14_isolate	2015-06-24	Profiler (radius=10, n=0) : bcdGFP_st14_cacofix_0001.tab.txt	1	1	27	NA	112	0.911	109	0.987	1.02752	110.5	NA
MS2/MCP	bcdGFP_st14_isolate	2015-06-24	Profiler (radius=10, n=0) : bcdGFP_st14_cacofix_0001.tab.txt	1	1	31	NA	107	0.963	102	0.979	1.04902	104.5	NA
MS2/MCP	bcdGFP_st14_isolate	2015-06-24	Profiler (radius=10, n=0) : bcdGFP_st14_cacofix_0001.tab.txt	1	1	33	NA	98	0.98	172	0.955	0.569767	135	NA
MS2/MCP	bcdGFP_st14_isolate	2015-06-24	Profiler (radius=10, n=0) : bcdGFP_st14_cacofix_0001.tab.txt	1	1	34	NA	183	0.973	170	0.828	1.07647	176.5	NA
MS2/MCP	bcdGFP_st14_isolate	2015-06-24	Profiler (radius=10, n=0) : bcdGFP_st14_cacofix_0001.tab.txt	1	1	35	NA	170	0.892	114	0.983	1.49123	142	NA
MS2/MCP	bcdGFP_st14_isolate	2015-06-24	Profiler (radius=10, n=0) : bcdGFP_st14_cacofix_0001.tab.txt	1	1	36	NA	117	0.984	135	0.982	0.866667	126	NA
MS2/MCP	bcdGFP_st14_isolate	2015-06-24	Profiler (radius=10, n=0) : bcdGFP_st14_cacofix_0001.tab.txt	1	1	39	NA	107	0.948	126	0.992	0.849206	116.5	NA
MS2/MCP	bcdGFP_st14_isolate	2015-06-24	Profiler (radius=10, n=0) : bcdGFP_st14_cacofix_0001.tab.txt	1	1	41	NA	120	0.966	145	0.933	0.827586	132.5	NA
MS2/MCP	bcdGFP_st14_isolate	2015-06-24	Profiler (radius=10, n=0) : bcdGFP_st14_cacofix_0001.tab.txt	1	1	44	NA	151	0.983	142	0.972	1.06338	146.5	NA
MS2/MCP	bcdGFP_st14_isolate	2015-06-24	Profiler (radius=10, n=0) : bcdGFP_st14_cacofix_0001.tab.txt	1	1	45	NA	134	0.964	111	0.952	1.20721	122.5	NA
MS2/MCP	bcdGFP_st14_isolate	2015-06-24	Profiler (radius=10, n=0) : bcdGFP_st14_cacofix_0001.tab.txt	1	1	48	NA	264	0.864	160	0.983	1.65	212	NA
MS2/MCP	bcdGFP_st14_isolate	2015-06-24	Profiler (radius=10, n=0) : bcdGFP_st14_cacofix_0001.tab.txt	1	1	51	NA	129	0.953	97	0.957	1.3299	113	NA
MS2/MCP	bcdGFP_st14_isolate	2015-06-24	Profiler (radius=10, n=0) : bcdGFP_st14_cacofix_0001.tab.txt	1	1	54	NA	185	0.981	167	0.936	1.10778	176	NA
MS2/MCP	bcdGFP_st14_isolate	2015-06-24	Profiler (radius=10, n=0) : bcdGFP_st14_cacofix_0001.tab.txt	1	1	57	NA	142	0.932	106	0.923	1.33962	124	NA
MS2/MCP	bcdGFP_st14_isolate	2015-06-24	Profiler (radius=10, n=0) : bcdGFP_st14_cacofix_0001.tab.txt	1	1	59	NA	141	0.973	114	0.982	1.23684	127.5	NA
MS2/MCP	bcdGFP_st14_isolate	2015-06-24	Profiler (radius=10, n=0) : bcdGFP_st14_cacofix_0001.tab.txt	1	1	60	NA	105	0.986	127	0.952	0.826772	116	NA
MS2/MCP	bcdGFP_st14_isolate	2015-06-24	Profiler (radius=10, n=0) : bcdGFP_st14_cacofix_0001.tab.txt	1	1	63	NA	165	0.888	136	0.932	1.21324	150.5	NA
MS2/MCP	bcdGFP_st14_isolate	2015-06-24	Profiler (radius=10, n=0) : bcdGFP_st14_cacofix_0001.tab.txt	1	1	64	NA	158	0.856	92	0.812	1.71739	125	NA
MS2/MCP	bcdGFP_st14_isolate	2015-06-24	Profiler (radius=10, n=0) : bcdGFP_st14_cacofix_0001.tab.txt	1	1	68	NA	111	0.868	127	0.923	0.874016	119	NA
MS2/MCP	bcdGFP_st14_isolate	2015-06-24	Profiler (radius=10, n=0) : bcdGFP_st14_cacofix_0001.tab.txt	1	1	70	NA	86	0.983	105	0.93	0.819048	95.5	NA
MS2/MCP	bcdGFP_st14_isolate	2015-06-24	Profiler (radius=10, n=0) : bcdGFP_st14_cacofix_0001.tab.txt	1	1	71	NA	90	0.948	141	0.886	0.638298	115.5	NA
MS2/MCP	bcdGFP_st14_isolate	2015-06-24	Profiler (radius=10, n=0) : bcdGFP_st14_cacofix_0001.tab.txt	1	1	75	NA	87	0.967	80	0.926	1.0875	83.5	NA
MS2/MCP	bcdGFP_st14_isolate	2015-06-24	Profiler (radius=10, n=0) : bcdGFP_st14_cacofix_0001.tab.txt	1	1	79	NA	80	0.909	141	0.97	0.567376	110.5	NA
MS2/MCP	bcdGFP_st14_isolate	2015-06-24	Profiler (radius=10, n=0) : bcdGFP_st14_cacofix_0001.tab.txt	1	1	98	NA	69	0.867	80	0.877	0.8625	74.5	NA
MS2/MCP	bcdGFP_st14_isolate	2015-06-24	Profiler (radius=10, n=0) : bcdGFP_st14_cacofix_0001.tab.txt	1	1	116	NA	126	0.928	68	0.856	1.85294	97	NA
MS2/MCP	bcdGFP_st14_isolate	2015-06-24	Profiler (radius=10, n=0) : bcdGFP_st14_cacofix_0006.tab.txt	2	1	0	NA	136	0.987	142	0.966	0.957746	139	NA
MS2/MCP	bcdGFP_st14_isolate	2015-06-24	Profiler (radius=10, n=0) : bcdGFP_st14_cacofix_0006.tab.txt	2	1	1	NA	172	0.867	158	0.952	1.08861	165	NA
MS2/MCP	bcdGFP_st14_isolate	2015-06-24	Profiler (radius=10, n=0) : bcdGFP_st14_cacofix_0006.tab.txt	2	1	11	NA	96	0.901	82	0.878	1.17073	89	NA
MS2/MCP	bcdGFP_st14_isolate	2015-06-24	Profiler (radius=10, n=0) : bcdGFP_st14_cacofix_0006.tab.txt	2	1	13	NA	122	0.959	101	0.971	1.20792	111.5	NA
MS2/MCP	bcdGFP_st14_isolate	2015-06-24	Profiler (radius=10, n=0) : bcdGFP_st14_cacofix_0006.tab.txt	2	1	21	NA	69	0.926	67	0.874	1.02985	68	NA
MS2/MCP	bcdGFP_st14_isolate	2015-06-03	Profiler (radius=10, n=0) : bcd_St14_0009.tab.txt	8	1	15	NA	146	0.813	89	0.927	1.64045	117.5	NA
MS2/MCP	bcdGFP_st14_isolate	2015-06-03	Profiler (radius=10, n=0) : bcd_St14_0017.tab.txt	8	2	0	NA	191	0.918	166	0.86	1.1506	178.5	NA
MS2/MCP	bcdGFP_st14_isolate	2015-06-03	Profiler (radius=10, n=0) : bcd_St14_0017.tab.txt	8	2	10	NA	149	0.883	188	0.848	0.792553	168.5	NA
MS2/MCP	bcdGFP_st14_isolate	2015-06-03	Profiler (radius=10, n=0) : bcd_St14_0021.tab.txt	8	3	0	NA	123	0.957	109	0.862	1.12844	116	NA
MS2/MCP	bcdGFP_st14_isolate	2015-06-03	Profiler (radius=10, n=0) : bcd_St14_0021.tab.txt	8	3	4	NA	196	0.954	110	0.932	1.78182	153	NA
MS2/MCP	bcdGFP_st14_isolate	2015-06-03	Profiler (radius=10, n=0) : bcd_St14_0021.tab.txt	8	3	5	NA	102	0.932	60	0.962	1.7	81	NA
MS2/MCP	bcdGFP_st14_isolate	2015-06-03	Profiler (radius=10, n=0) : bcd_St14_0021.tab.txt	8	3	8	NA	62	0.872	68	0.861	0.911765	65	NA
MS2/MCP	bcdGFP_st14_isolate	2015-06-03	Profiler (radius=10, n=0) : bcd_St14_0021.tab.txt	8	3	12	NA	78	0.837	46	0.835	1.69565	62	NA
MS2/MCP	bcdGFP_st14_isolate	2015-06-03	Profiler (radius=10, n=0) : bcd_St14_0021.tab.txt	8	3	18	NA	48	0.891	81	0.866	0.592593	64.5	NA
MS2/MCP	bcdGFP_st14_isolate	2015-06-03	Profiler (radius=10, n=0) : bcd_St14_0023.tab.txt	7	1	9	NA	81	0.973	132	0.943	0.613636	106.5	NA
MS2/MCP	bcdGFP_st14_isolate	2015-06-03	Profiler (radius=10, n=0) : bcd_St14_0023.tab.txt	7	1	15	NA	66	0.91	98	0.877	0.673469	82	NA
MS2/MCP	bcdGFP_st14_isolate	2015-06-03	Profiler (radius=10, n=0) : bcd_St14_0023.tab.txt	7	1	17	NA	99	0.969	96	0.99	1.03125	97.5	NA
MS2/MCP	bcdGFP_st14_isolate	2015-06-03	Profiler (radius=10, n=0) : bcd_St14_0023.tab.txt	7	1	20	NA	113	0.889	93	0.934	1.21505	103	NA
MS2/MCP	bcdGFP_st14_isolate	2015-06-03	Profiler (radius=10, n=0) : bcd_St14_0026.tab.txt	6	1	3	NA	92	0.923	137	0.987	0.671533	114.5	NA
MS2/MCP	bcdGFP_st14_isolate	2015-06-03	Profiler (radius=10, n=0) : bcd_St14_0026.tab.txt	6	1	9	NA	81	0.914	77	0.928	1.05195	79	NA
MS2/MCP	bcdGFP_st14_isolate	2015-06-03	Profiler (radius=10, n=0) : bcd_St14_0026.tab.txt	6	1	13	NA	103	0.909	68	0.835	1.51471	85.5	NA
MS2/MCP	bcdGFP_st14_isolate	2015-06-03	Profiler (radius=10, n=0) : bcd_St14_0026.tab.txt	6	1	14	NA	78	0.955	115	0.939	0.678261	96.5	NA
MS2/MCP	bcdGFP_st14_isolate	2015-06-03	Profiler (radius=10, n=0) : bcd_St14_0026.tab.txt	6	1	23	NA	84	0.892	105	0.919	0.8	94.5	NA
MS2/MCP	bcdGFP_st14_isolate	2015-06-03	Profiler (radius=10, n=0) : bcd_St14_0026.tab.txt	6	1	24	NA	76	0.84	118	0.905	0.644068	97	NA
MS2/MCP	bcdGFP_st14_isolate	2015-06-03	Profiler (radius=10, n=0) : bcd_St14_0026.tab.txt	6	1	27	NA	52	0.914	87	0.972	0.597701	69.5	NA
MS2/MCP	bcdGFP_st14_isolate	2015-06-03	Profiler (radius=10, n=0) : bcd_St14_0026.tab.txt	6	1	28	NA	115	0.932	104	0.928	1.10577	109.5	NA
MS2/MCP	bcdGFP_st14_isolate	2015-06-03	Profiler (radius=10, n=0) : bcd_St14_0026.tab.txt	6	1	33	NA	56	0.853	67	0.818	0.835821	61.5	NA
MS2/MCP	bcdGFP_st14_isolate	2015-06-03	Profiler (radius=10, n=0) : bcd_St14_0026.tab.txt	6	1	34	NA	87	0.906	70	0.911	1.24286	78.5	NA
MS2/MCP	bcdGFP_st14_isolate	2015-06-03	Profiler (radius=10, n=0) : bcd_St14_0026.tab.txt	6	1	36	NA	58	0.918	49	0.932	1.18367	53.5	NA
MS2/MCP	bcdGFP_st14_isolate	2015-06-03	Profiler (radius=10, n=0) : bcd_St14_0026.tab.txt	6	1	38	NA	58	0.835	75	0.845	0.773333	66.5	NA
MS2/MCP	bcdGFP_st14_isolate	2015-06-03	Profiler (radius=10, n=0) : bcd_St14_0026.tab.txt	6	1	42	NA	106	0.908	66	0.912	1.60606	86	NA
MS2/MCP	bcdGFP_st14_isolate	2015-06-03	Profiler (radius=10, n=0) : bcd_St14_0030.tab.txt	6	2	28	NA	94	0.941	158	0.955	0.594937	126	NA
MS2/MCP	bcdGFP_st14_isolate	2015-06-03	Profiler (radius=10, n=0) : bcd_St14_0030.tab.txt	6	2	49	NA	99	0.985	129	0.836	0.767442	114	NA
MS2/MCP	bcdGFP_st14_isolate	2015-06-03	Profiler (radius=10, n=0) : bcd_St14_0030.tab.txt	6	2	54	NA	77	0.846	93	0.939	0.827957	85	NA
MS2/MCP	bcdGFP_st14_isolate	2015-06-03	Profiler (radius=10, n=0) : bcd_St14_0030.tab.txt	6	2	56	NA	156	0.83	161	0.909	0.968944	158.5	NA
MS2/MCP	bcdGFP_st14_isolate	2015-06-03	Profiler (radius=10, n=0) : bcd_St14_0030.tab.txt	6	2	58	NA	122	0.985	172	0.95	0.709302	147	NA
MS2/MCP	bcdGFP_st14_isolate	2015-06-03	Profiler (radius=10, n=0) : bcd_St14_0030.tab.txt	6	2	72	NA	67	0.899	82	0.882	0.817073	74.5	NA
MS2/MCP	bcdGFP_st14_isolate	2015-06-03	Profiler (radius=10, n=0) : bcd_St14_0030.tab.txt	6	2	103	NA	113	0.928	82	0.818	1.37805	97.5	NA
MS2/MCP	bcdGFP_st14_isolate	2015-06-03	Profiler (radius=10, n=0) : bcd_St14_0034.tab.txt	6	3	6	NA	143	0.906	162	0.97	0.882716	152.5	NA
MS2/MCP	bcdGFP_st14_isolate	2015-06-03	Profiler (radius=10, n=0) : bcd_St14_0034.tab.txt	6	3	33	NA	223	0.994	114	0.984	1.95614	168.5	NA
MS2/MCP	bcdGFP_st14_isolate	2015-06-03	Profiler (radius=10, n=0) : bcd_St14_0034.tab.txt	6	3	46	NA	98	0.992	105	0.984	0.933333	101.5	NA
MS2/MCP	bcdGFP_st14_isolate	2015-06-03	Profiler (radius=10, n=0) : bcd_St14_0034.tab.txt	6	3	52	NA	132	0.902	101	0.941	1.30693	116.5	NA
MS2/MCP	bcdGFP_st14_isolate	2015-06-03	Profiler (radius=10, n=0) : bcd_St14_0034.tab.txt	6	3	64	NA	147	0.814	132	0.905	1.11364	139.5	NA
MS2/MCP	bcdGFP_st14_isolate	2015-06-03	Profiler (radius=10, n=0) : bcd_St14_0034.tab.txt	6	3	75	NA	77	0.81	81	0.858	0.950617	79	NA
MS2/MCP	bcdGFP_st14_isolate	2015-06-03	Profiler (radius=10, n=0) : bcd_St14_0034.tab.txt	6	3	77	NA	111	0.953	87	0.965	1.27586	99	NA
MS2/MCP	bcdGFP_st14_isolate	2015-06-03	Profiler (radius=10, n=0) : bcd_St14_0034.tab.txt	6	3	94	NA	93	0.901	108	0.946	0.861111	100.5	NA
MS2/MCP	bcdGFP_st14_isolate	2015-06-03	Profiler (radius=10, n=0) : bcd_St14_0034.tab.txt	6	3	96	NA	63	0.947	119	0.949	0.529412	91	NA
MS2/MCP	bcdGFP_st14_isolate	2015-06-03	Profiler (radius=10, n=0) : bcd_St14_0034.tab.txt	6	3	97	NA	113	0.918	62	0.94	1.82258	87.5	NA
MS2/MCP	bcdGFP_st14_isolate	2015-06-03	Profiler (radius=10, n=0) : bcd_St14_0034.tab.txt	6	3	105	NA	109	0.867	91	0.974	1.1978	100	NA
MS2/MCP	bcdGFP_st14_isolate	2015-06-03	Profiler (radius=10, n=0) : bcd_St14_0034.tab.txt	6	3	120	NA	81	0.95	57	0.942	1.42105	69	NA
MS2/MCP	bcdGFP_st14_isolate	2015-06-03	Profiler (radius=10, n=0) : bcd_St14_0043.tab.txt	6	4	2	NA	115	0.96	115	0.974	1	115	NA
MS2/MCP	bcdGFP_st14_isolate	2015-06-03	Profiler (radius=10, n=0) : bcd_St14_0043.tab.txt	6	4	3	NA	94	0.957	108	0.911	0.87037	101	NA
MS2/MCP	bcdGFP_st14_isolate	2015-06-03	Profiler (radius=10, n=0) : bcd_St14_0043.tab.txt	6	4	8	NA	93	0.972	163	0.833	0.570552	128	NA
MS2/MCP	bcdGFP_st14_isolate	2015-06-03	Profiler (radius=10, n=0) : bcd_St14_0043.tab.txt	6	4	10	NA	182	0.944	102	0.969	1.78431	142	NA
MS2/MCP	bcdGFP_st14_isolate	2015-06-03	Profiler (radius=10, n=0) : bcd_St14_0043.tab.txt	6	4	12	NA	124	0.997	90	0.892	1.37778	107	NA
MS2/MCP	bcdGFP_st14_isolate	2015-06-03	Profiler (radius=10, n=0) : bcd_St14_0043.tab.txt	6	4	13	NA	102	0.979	118	0.992	0.864407	110	NA
MS2/MCP	bcdGFP_st14_isolate	2015-06-03	Profiler (radius=10, n=0) : bcd_St14_0043.tab.txt	6	4	20	NA	106	0.928	133	0.887	0.796992	119.5	NA
MS2/MCP	bcdGFP_st14_isolate	2015-06-03	Profiler (radius=10, n=0) : bcd_St14_0043.tab.txt	6	4	21	NA	79	0.845	81	0.918	0.975309	80	NA
MS2/MCP	bcdGFP_st14_isolate	2015-06-03	Profiler (radius=10, n=0) : bcd_St14_0043.tab.txt	6	4	24	NA	128	0.906	142	0.848	0.901408	135	NA
MS2/MCP	bcd*GFP st9 1x bcdMS2	2015-09-02	bcdGFP_onecopy_st9_0000.tab.txt	1	1	6	0.98	80	0.92	130	0.97	0.615385	105	220.35
MS2/MCP	bcd*GFP st9 1x bcdMS2	2015-09-02	bcdGFP_onecopy_st9_0000.tab.txt	1	1	7	3.32	80	0.86	80	0.87	1	80	178.33
MS2/MCP	bcd*GFP st9 1x bcdMS2	2015-09-02	bcdGFP_onecopy_st9_0000.tab.txt	1	1	14	5.75	80	0.89	110	0.84	0.727273	95	121.67
MS2/MCP	bcd*GFP st9 1x bcdMS2	2015-09-02	bcdGFP_onecopy_st9_0000.tab.txt	1	1	23	1.45	100	0.98	140	0.97	0.714286	120	206.01
MS2/MCP	bcd*GFP st9 1x bcdMS2	2015-09-02	bcdGFP_onecopy_st9_0000.tab.txt	1	1	45	0.33	90	0.96	120	0.87	0.75	105	181.49
MS2/MCP	bcd*GFP st9 1x bcdMS2	2015-09-02	bcdGFP_onecopy_st9_0000.tab.txt	1	1	117	0.57	80	0.91	120	0.84	0.666667	100	99.06
MS2/MCP	bcd*GFP st9 1x bcdMS2	2015-09-02	bcdGFP_onecopy_st9_0000.tab.txt	1	1	119	12.22	110	0.96	130	0.9	0.846154	120	150.19
MS2/MCP	bcd*GFP st9 1x bcdMS2	2015-09-02	bcdGFP_onecopy_st9_0000.tab.txt	1	1	132	0.74	80	0.88	90	0.97	0.888889	85	66.31
MS2/MCP	bcd*GFP st9 1x bcdMS2	2015-09-02	bcdGFP_onecopy_st9_0000.tab.txt	1	1	138	0.84	60	0.92	80	0.91	0.75	70	42.6
MS2/MCP	bcd*GFP st9 1x bcdMS2	2015-09-02	bcdGFP_onecopy_st9_0000.tab.txt	1	1	149	4.5	90	0.94	130	0.87	0.692308	110	105.14
MS2/MCP	bcd*GFP st9 1x bcdMS2	2015-09-02	bcdGFP_onecopy_st9_0004.tab.txt	1	2	2	5	90	0.95	90	0.88	1	90	174.51
MS2/MCP	bcd*GFP st9 1x bcdMS2	2015-09-02	bcdGFP_onecopy_st9_0004.tab.txt	1	2	32	2.53	130	0.83	140	0.93	0.928571	135	179.47
MS2/MCP	bcd*GFP st9 1x bcdMS2	2015-09-02	bcdGFP_onecopy_st9_0008.tab.txt	1	3	5	0.67	70	0.86	140	0.96	0.5	105	208.55
MS2/MCP	bcd*GFP st9 1x bcdMS2	2015-09-02	bcdGFP_onecopy_st9_0008.tab.txt	1	3	11	2.92	100	0.99	140	0.9	0.714286	120	260.19
MS2/MCP	bcd*GFP st9 1x bcdMS2	2015-09-02	bcdGFP_onecopy_st9_0008.tab.txt	1	3	12	0.61	140	0.9	80	0.97	1.75	110	216.57
MS2/MCP	bcd*GFP st9 1x bcdMS2	2015-09-02	bcdGFP_onecopy_st9_0008.tab.txt	1	3	38	2.84	140	0.89	130	0.91	1.07692	135	180.57
MS2/MCP	bcd*GFP st9 1x bcdMS2	2015-09-02	bcdGFP_onecopy_st9_0008.tab.txt	1	3	69	2.37	120	0.98	120	0.88	1	120	149.57
MS2/MCP	bcd*GFP st9 1x bcdMS2	2015-09-02	bcdGFP_onecopy_st9_0008.tab.txt	1	3	70	1.15	80	0.96	160	0.95	0.5	120	125.53
MS2/MCP	bcd*GFP st9 1x bcdMS2	2015-09-02	bcdGFP_onecopy_st9_0011.tab.txt	1	4	6	0.92	120	0.97	110	0.87	1.09091	115	281.87
MS2/MCP	bcd*GFP st9 1x bcdMS2	2015-09-02	bcdGFP_onecopy_st9_0011.tab.txt	1	4	10	1.12	100	0.99	140	0.85	0.714286	120	316.15
MS2/MCP	bcd*GFP st9 1x bcdMS2	2015-09-02	bcdGFP_onecopy_st9_0011.tab.txt	1	4	38	5.78	160	0.98	90	0.98	1.77778	125	201.58
MS2/MCP	bcd*GFP st9 1x bcdMS2	2015-09-02	bcdGFP_onecopy_st9_0011.tab.txt	1	4	54	3.2	180	0.95	100	0.97	1.8	140	298.28
MS2/MCP	bcd*GFP st9 1x bcdMS2	2015-09-02	bcdGFP_onecopy_st9_0011.tab.txt	1	4	162	2.42	120	0.92	90	0.95	1.33333	105	73.37
MS2/MCP	bcd*GFP st9 1x bcdMS2	2015-09-02	bcdGFP_onecopy_st9_0014.tab.txt	1	5	2	1.03	90	0.9	110	0.95	0.818182	100	149.27
MS2/MCP	bcd*GFP st9 1x bcdMS2	2015-09-02	bcdGFP_onecopy_st9_0014.tab.txt	1	5	11	0.14	110	0.97	120	0.96	0.916667	115	148.07
MS2/MCP	bcd*GFP st9 1x bcdMS2	2015-09-02	bcdGFP_onecopy_st9_0014.tab.txt	1	5	29	2	70	0.86	90	0.92	0.777778	80	61.13
MS2/MCP	bcd*GFP st9 1x bcdMS2	2015-09-02	bcdGFP_onecopy_st9_0014.tab.txt	1	5	39	2.31	100	0.87	90	0.96	1.11111	95	56.26
MS2/MCP	bcd*GFP st9 1x bcdMS2	2015-09-02	bcdGFP_onecopy_st9_0017.tab.txt	2	1	1	1.23	80	0.83	90	0.94	0.888889	85	235.94
MS2/MCP	bcd*GFP st9 1x bcdMS2	2015-09-02	bcdGFP_onecopy_st9_0017.tab.txt	2	1	3	0.96	90	0.86	80	0.89	1.125	85	223.59
MS2/MCP	bcd*GFP st9 1x bcdMS2	2015-09-02	bcdGFP_onecopy_st9_0017.tab.txt	2	1	7	1.39	110	0.9	90	0.81	1.22222	100	272.92
MS2/MCP	bcd*GFP st9 1x bcdMS2	2015-09-02	bcdGFP_onecopy_st9_0017.tab.txt	2	1	12	2	80	0.93	60	0.8	1.33333	70	159.71
MS2/MCP	bcd*GFP st9 1x bcdMS2	2015-09-02	bcdGFP_onecopy_st9_0017.tab.txt	2	1	16	1.15	90	0.88	80	0.9	1.125	85	168.67
MS2/MCP	bcd*GFP st9 1x bcdMS2	2015-09-02	bcdGFP_onecopy_st9_0017.tab.txt	2	1	20	0.72	120	0.95	110	0.95	1.09091	115	305.2
MS2/MCP	bcd*GFP st9 1x bcdMS2	2015-09-02	bcdGFP_onecopy_st9_0017.tab.txt	2	1	41	0.86	70	0.9	110	0.95	0.636364	90	163.03
MS2/MCP	bcd*GFP st9 1x bcdMS2	2015-09-02	bcdGFP_onecopy_st9_0017.tab.txt	2	1	63	2.82	120	0.93	60	0.91	2	90	114.17
MS2/MCP	bcd*GFP st9 1x bcdMS2	2015-09-02	bcdGFP_onecopy_st9_0017.tab.txt	2	1	75	1.56	90	0.83	110	0.81	0.818182	100	124.41
MS2/MCP	bcd*GFP st9 1x bcdMS2	2015-09-02	bcdGFP_onecopy_st9_0017.tab.txt	2	1	76	1.43	70	0.84	80	0.94	0.875	75	106.35
MS2/MCP	bcd*GFP st9 1x bcdMS2	2015-09-02	bcdGFP_onecopy_st9_0017.tab.txt	2	1	79	1.16	70	0.92	70	0.94	1	70	94.68
MS2/MCP	bcd*GFP st9 1x bcdMS2	2015-09-02	bcdGFP_onecopy_st9_0017.tab.txt	2	1	83	1.81	80	0.91	80	0.86	1	80	128.92
MS2/MCP	bcd*GFP st9 1x bcdMS2	2015-09-02	bcdGFP_onecopy_st9_0017.tab.txt	2	1	90	2.23	130	0.96	100	0.89	1.3	115	215.28
MS2/MCP	bcd*GFP st9 1x bcdMS2	2015-09-02	bcdGFP_onecopy_st9_0017.tab.txt	2	1	102	2.38	100	0.94	90	0.97	1.11111	95	131.76
MS2/MCP	bcd*GFP st9 1x bcdMS2	2015-09-02	bcdGFP_onecopy_st9_0017.tab.txt	2	1	108	0.66	90	0.96	90	0.96	1	90	106.33
MS2/MCP	bcd*GFP st9 1x bcdMS2	2015-09-02	bcdGFP_onecopy_st9_0017.tab.txt	2	1	111	1.05	110	0.95	80	0.91	1.375	95	125.41
MS2/MCP	bcd*GFP st9 1x bcdMS2	2015-09-02	bcdGFP_onecopy_st9_0017.tab.txt	2	1	127	2.98	100	0.96	100	0.89	1	100	103.42
MS2/MCP	bcd*GFP st9 1x bcdMS2	2015-09-02	bcdGFP_onecopy_st9_0017.tab.txt	2	1	141	0.63	120	0.92	200	0.95	0.6	160	216.43
MS2/MCP	bcd*GFP st9 1x bcdMS2	2015-09-02	bcdGFP_onecopy_st9_0017.tab.txt	2	1	147	1.42	110	0.87	60	0.89	1.83333	85	87.51
MS2/MCP	bcd*GFP st9 1x bcdMS2	2015-09-02	bcdGFP_onecopy_st9_0017.tab.txt	2	1	155	1.93	90	0.87	80	0.85	1.125	85	84.93
MS2/MCP	bcd*GFP st9 1x bcdMS2	2015-09-02	bcdGFP_onecopy_st9_0017.tab.txt	2	1	161	0.59	100	0.97	70	0.91	1.42857	85	77.85
MS2/MCP	bcd*GFP st9 1x bcdMS2	2015-09-02	bcdGFP_onecopy_st9_0017.tab.txt	2	1	167	0.71	70	0.83	80	0.91	0.875	75	64.9
MS2/MCP	bcd*GFP st9 1x bcdMS2	2015-09-02	bcdGFP_onecopy_st9_0017.tab.txt	2	1	169	1.36	100	0.96	50	0.82	2	75	44.79
MS2/MCP	bcd*GFP st9 1x bcdMS2	2015-09-02	bcdGFP_onecopy_st9_0021.tab.txt	2	2	1	1.85	140	0.89	80	0.98	1.75	110	274.49
MS2/MCP	bcd*GFP st9 1x bcdMS2	2015-09-02	bcdGFP_onecopy_st9_0021.tab.txt	2	2	8	1.62	90	0.87	140	0.97	0.642857	115	274.39
MS2/MCP	bcd*GFP st9 1x bcdMS2	2015-09-02	bcdGFP_onecopy_st9_0021.tab.txt	2	2	15	2.24	170	0.92	170	0.8	1	170	352.36
MS2/MCP	bcd*GFP st9 1x bcdMS2	2015-09-02	bcdGFP_onecopy_st9_0021.tab.txt	2	2	35	1.59	80	0.94	80	0.82	1	80	104.21
MS2/MCP	bcd*GFP st9 1x bcdMS2	2015-09-02	bcdGFP_onecopy_st9_0021.tab.txt	2	2	45	0.47	160	0.83	210	0.85	0.761905	185	275.17
MS2/MCP	bcd*GFP st9 1x bcdMS2	2015-09-02	bcdGFP_onecopy_st9_0021.tab.txt	2	2	48	0.92	80	0.9	100	0.93	0.8	90	113.68
MS2/MCP	bcd*GFP st9 1x bcdMS2	2015-09-02	bcdGFP_onecopy_st9_0021.tab.txt	2	2	60	0.72	120	0.91	80	0.92	1.5	100	97.26
MS2/MCP	bcd*GFP st9 1x bcdMS2	2015-09-02	bcdGFP_onecopy_st9_0021.tab.txt	2	2	63	0.59	120	0.91	90	0.91	1.33333	105	129.99
MS2/MCP	bcd*GFP st9 1x bcdMS2	2015-09-02	bcdGFP_onecopy_st9_0021.tab.txt	2	2	64	0.45	60	0.8	60	0.84	1	60	66.58
MS2/MCP	bcd*GFP st9 1x bcdMS2	2015-09-02	bcdGFP_onecopy_st9_0021.tab.txt	2	2	82	1.55	160	0.82	80	0.96	2	120	114.14
MS2/MCP	bcd*GFP st9 1x bcdMS2	2015-09-02	bcdGFP_onecopy_st9_0021.tab.txt	2	2	83	0.96	70	0.89	70	0.96	1	70	65.67
MS2/MCP	bcd*GFP st9 1x bcdMS2	2015-09-02	bcdGFP_onecopy_st9_0021.tab.txt	2	2	86	1.19	130	0.87	90	0.95	1.44444	110	97.38
MS2/MCP	bcd*GFP st9 1x bcdMS2	2015-09-02	bcdGFP_onecopy_st9_0021.tab.txt	2	2	87	0.6	60	0.89	70	0.93	0.857143	65	56.82
MS2/MCP	bcd*GFP st9 1x bcdMS2	2015-09-02	bcdGFP_onecopy_st9_0021.tab.txt	2	2	100	2.49	100	0.9	100	0.85	1	100	74.91
MS2/MCP	bcd*GFP st9 1x bcdMS2	2015-09-02	bcdGFP_onecopy_st9_0025.tab.txt	2	3	4	2.65	90	0.91	60	0.92	1.5	75	108.36
MS2/MCP	bcd*GFP st9 1x bcdMS2	2015-09-02	bcdGFP_onecopy_st9_0025.tab.txt	2	3	5	2.75	180	0.96	90	0.96	2	135	256.73
MS2/MCP	bcd*GFP st9 1x bcdMS2	2015-09-02	bcdGFP_onecopy_st9_0025.tab.txt	2	3	8	3.56	100	0.86	90	0.95	1.11111	95	135.49
MS2/MCP	bcd*GFP st9 1x bcdMS2	2015-09-02	bcdGFP_onecopy_st9_0025.tab.txt	2	3	13	1.32	120	0.97	170	0.89	0.705882	145	250.82
MS2/MCP	bcd*GFP st9 1x bcdMS2	2015-09-02	bcdGFP_onecopy_st9_0025.tab.txt	2	3	14	1.88	140	0.99	120	0.92	1.16667	130	227.65
MS2/MCP	bcd*GFP st9 1x bcdMS2	2015-09-02	bcdGFP_onecopy_st9_0025.tab.txt	2	3	22	1.46	80	0.88	100	0.87	0.8	90	99.14
MS2/MCP	bcd*GFP st9 1x bcdMS2	2015-09-02	bcdGFP_onecopy_st9_0025.tab.txt	2	3	33	2.15	140	0.83	140	0.98	1	140	178.6
MS2/MCP	bcd*GFP st9 1x bcdMS2	2015-09-02	bcdGFP_onecopy_st9_0025.tab.txt	2	3	41	8.16	60	0.86	90	0.95	0.666667	75	84.87
MS2/MCP	bcd*GFP st9 1x bcdMS2	2015-09-02	bcdGFP_onecopy_st9_0025.tab.txt	2	3	57	0.65	70	0.85	70	0.96	1	70	54.84
MS2/MCP	bcd*GFP st9 1x bcdMS2	2015-09-02	bcdGFP_onecopy_st9_0025.tab.txt	2	3	65	4.48	130	0.85	160	0.87	0.8125	145	160.88
MS2/MCP	bcd*GFP st9 1x bcdMS2	2015-09-02	bcdGFP_onecopy_st9_0025.tab.txt	2	3	67	3.44	40	0.87	60	0.89	0.666667	50	22.85
MS2/MCP	bcd*GFP st9 1x bcdMS2	2015-09-02	bcdGFP_onecopy_st9_0025.tab.txt	2	3	83	4.08	80	0.94	120	0.95	0.666667	100	80.4
MS2/MCP	bcd*GFP st9 1x bcdMS2	2015-09-02	bcdGFP_onecopy_st9_0028.tab.txt	2	4	0	1.51	70	0.95	130	0.86	0.538462	100	224
MS2/MCP	bcd*GFP st9 1x bcdMS2	2015-09-02	bcdGFP_onecopy_st9_0028.tab.txt	2	4	4	0.81	80	0.87	140	0.92	0.571429	110	229.41
MS2/MCP	bcd*GFP st9 1x bcdMS2	2015-09-02	bcdGFP_onecopy_st9_0028.tab.txt	2	4	7	1.44	110	0.96	90	0.86	1.22222	100	161.31
MS2/MCP	bcd*GFP st9 1x bcdMS2	2015-09-02	bcdGFP_onecopy_st9_0028.tab.txt	2	4	12	2.14	140	0.91	140	0.89	1	140	262.36
MS2/MCP	bcd*GFP st9 1x bcdMS2	2015-09-02	bcdGFP_onecopy_st9_0028.tab.txt	2	4	13	0.51	160	0.99	140	0.95	1.14286	150	268.63
MS2/MCP	bcd*GFP st9 1x bcdMS2	2015-09-02	bcdGFP_onecopy_st9_0028.tab.txt	2	4	17	1.76	120	0.96	140	0.89	0.857143	130	200.73
MS2/MCP	bcd*GFP st9 1x bcdMS2	2015-09-02	bcdGFP_onecopy_st9_0028.tab.txt	2	4	33	1.3	90	0.97	140	0.93	0.642857	115	160.83
MS2/MCP	bcd*GFP st9 1x bcdMS2	2015-09-02	bcdGFP_onecopy_st9_0028.tab.txt	2	4	36	0.83	130	0.84	70	0.95	1.85714	100	108.21
MS2/MCP	bcd*GFP st9 1x bcdMS2	2015-09-02	bcdGFP_onecopy_st9_0028.tab.txt	2	4	37	1.2	130	0.99	190	0.96	0.684211	160	261.19
MS2/MCP	bcd*GFP st9 1x bcdMS2	2015-09-02	bcdGFP_onecopy_st9_0028.tab.txt	2	4	44	1.82	50	0.85	60	0.8	0.833333	55	57.96
MS2/MCP	bcd*GFP st9 1x bcdMS2	2015-09-02	bcdGFP_onecopy_st9_0028.tab.txt	2	4	45	1.61	80	0.88	110	0.85	0.727273	95	102.75
MS2/MCP	bcd*GFP st9 1x bcdMS2	2015-09-02	bcdGFP_onecopy_st9_0028.tab.txt	2	4	47	2.02	100	0.92	80	0.97	1.25	90	92.11
MS2/MCP	bcd*GFP st9 1x bcdMS2	2015-09-02	bcdGFP_onecopy_st9_0028.tab.txt	2	4	54	1.91	90	0.82	80	0.81	1.125	85	90.38
MS2/MCP	bcd*GFP st9 1x bcdMS2	2015-09-02	bcdGFP_onecopy_st9_0028.tab.txt	2	4	63	1	90	0.81	60	0.89	1.5	75	69.34
MS2/MCP	bcd*GFP st9 1x bcdMS2	2015-09-02	bcdGFP_onecopy_st9_0028.tab.txt	2	4	78	2.6	140	0.95	80	0.94	1.75	110	72.56
MS2/MCP	bcd*GFP st9 1x bcdMS2	2015-09-02	bcdGFP_onecopy_st9_0032.tab.txt	3	1	1	1.33	140	0.94	80	0.84	1.75	110	275.4
MS2/MCP	bcd*GFP st9 1x bcdMS2	2015-09-02	bcdGFP_onecopy_st9_0032.tab.txt	3	1	3	0.63	120	0.96	110	0.94	1.09091	115	280.98
MS2/MCP	bcd*GFP st9 1x bcdMS2	2015-09-02	bcdGFP_onecopy_st9_0032.tab.txt	3	1	7	1.63	90	0.89	120	0.94	0.75	105	214.49
MS2/MCP	bcd*GFP st9 1x bcdMS2	2015-09-02	bcdGFP_onecopy_st9_0032.tab.txt	3	1	10	0.67	220	0.96	130	0.87	1.69231	175	401.67
MS2/MCP	bcd*GFP st9 1x bcdMS2	2015-09-02	bcdGFP_onecopy_st9_0032.tab.txt	3	1	11	0.69	90	0.93	90	0.98	1	90	158.48
MS2/MCP	bcd*GFP st9 1x bcdMS2	2015-09-02	bcdGFP_onecopy_st9_0032.tab.txt	3	1	15	0.25	100	0.85	90	0.9	1.11111	95	134.35
MS2/MCP	bcd*GFP st9 1x bcdMS2	2015-09-02	bcdGFP_onecopy_st9_0032.tab.txt	3	1	23	0.61	110	0.93	120	0.96	0.916667	115	216.25
MS2/MCP	bcd*GFP st9 1x bcdMS2	2015-09-02	bcdGFP_onecopy_st9_0032.tab.txt	3	1	25	0.95	80	0.87	120	0.96	0.666667	100	136
MS2/MCP	bcd*GFP st9 1x bcdMS2	2015-09-02	bcdGFP_onecopy_st9_0032.tab.txt	3	1	27	1.07	80	0.89	90	0.84	0.888889	85	114.29
MS2/MCP	bcd*GFP st9 1x bcdMS2	2015-09-02	bcdGFP_onecopy_st9_0032.tab.txt	3	1	42	1.14	70	0.9	40	0.82	1.75	55	57.58
MS2/MCP	bcd*GFP st9 1x bcdMS2	2015-09-02	bcdGFP_onecopy_st9_0032.tab.txt	3	1	45	1.8	100	0.94	90	0.97	1.11111	95	115.16
MS2/MCP	bcd*GFP st9 1x bcdMS2	2015-09-02	bcdGFP_onecopy_st9_0032.tab.txt	3	1	48	1.41	70	0.88	70	0.9	1	70	76.62
MS2/MCP	bcd*GFP st9 1x bcdMS2	2015-09-02	bcdGFP_onecopy_st9_0032.tab.txt	3	1	51	0.41	100	0.96	60	0.93	1.66667	80	93.24
MS2/MCP	bcd*GFP st9 1x bcdMS2	2015-09-02	bcdGFP_onecopy_st9_0032.tab.txt	3	1	52	0.81	110	0.85	100	0.82	1.1	105	135.53
MS2/MCP	bcd*GFP st9 1x bcdMS2	2015-09-02	bcdGFP_onecopy_st9_0032.tab.txt	3	1	53	3.58	100	0.94	100	0.96	1	100	114.74
MS2/MCP	bcd*GFP st9 1x bcdMS2	2015-09-02	bcdGFP_onecopy_st9_0032.tab.txt	3	1	56	1.04	90	0.91	80	0.9	1.125	85	89.68
MS2/MCP	bcd*GFP st9 1x bcdMS2	2015-09-02	bcdGFP_onecopy_st9_0032.tab.txt	3	1	67	1.7	120	0.83	100	0.83	1.2	110	123.14
MS2/MCP	bcd*GFP st9 1x bcdMS2	2015-09-02	bcdGFP_onecopy_st9_0032.tab.txt	3	1	78	3.85	60	0.85	70	0.94	0.857143	65	43.83
MS2/MCP	bcd*GFP st9 1x bcdMS2	2015-09-02	bcdGFP_onecopy_st9_0035.tab.txt	3	2	4	1.58	110	0.92	140	0.92	0.785714	125	258.64
MS2/MCP	bcd*GFP st9 1x bcdMS2	2015-09-02	bcdGFP_onecopy_st9_0035.tab.txt	3	2	9	0.3	100	0.97	140	0.92	0.714286	120	236.3
MS2/MCP	bcd*GFP st9 1x bcdMS2	2015-09-02	bcdGFP_onecopy_st9_0035.tab.txt	3	2	10	2.2	50	0.91	60	0.85	0.833333	55	76.21
MS2/MCP	bcd*GFP st9 1x bcdMS2	2015-09-02	bcdGFP_onecopy_st9_0035.tab.txt	3	2	12	3.01	130	0.95	120	0.99	1.08333	125	258.92
MS2/MCP	bcd*GFP st9 1x bcdMS2	2015-09-02	bcdGFP_onecopy_st9_0035.tab.txt	3	2	18	2.99	110	0.98	100	0.95	1.1	105	188.04
MS2/MCP	bcd*GFP st9 1x bcdMS2	2015-09-02	bcdGFP_onecopy_st9_0035.tab.txt	3	2	20	0.7	140	0.94	150	0.96	0.933333	145	273.44
MS2/MCP	bcd*GFP st9 1x bcdMS2	2015-09-02	bcdGFP_onecopy_st9_0035.tab.txt	3	2	25	0.82	90	0.98	110	0.97	0.818182	100	146.99
MS2/MCP	bcd*GFP st9 1x bcdMS2	2015-09-02	bcdGFP_onecopy_st9_0035.tab.txt	3	2	27	1.12	120	0.97	170	0.86	0.705882	145	300.64
MS2/MCP	bcd*GFP st9 1x bcdMS2	2015-09-02	bcdGFP_onecopy_st9_0035.tab.txt	3	2	28	3.12	160	0.91	110	0.83	1.45455	135	209.4
MS2/MCP	bcd*GFP st9 1x bcdMS2	2015-09-02	bcdGFP_onecopy_st9_0035.tab.txt	3	2	30	0.44	140	0.97	130	0.97	1.07692	135	261.46
MS2/MCP	bcd*GFP st9 1x bcdMS2	2015-09-02	bcdGFP_onecopy_st9_0035.tab.txt	3	2	35	4.43	130	0.96	110	0.98	1.18182	120	195.34
MS2/MCP	bcd*GFP st9 1x bcdMS2	2015-09-02	bcdGFP_onecopy_st9_0035.tab.txt	3	2	37	0.17	110	0.92	80	0.89	1.375	95	119.78
MS2/MCP	bcd*GFP st9 1x bcdMS2	2015-09-02	bcdGFP_onecopy_st9_0035.tab.txt	3	2	40	1.89	90	0.89	100	0.83	0.9	95	110.51
MS2/MCP	bcd*GFP st9 1x bcdMS2	2015-09-02	bcdGFP_onecopy_st9_0035.tab.txt	3	2	42	2.6	90	0.88	130	0.96	0.692308	110	158.19
MS2/MCP	bcd*GFP st9 1x bcdMS2	2015-09-02	bcdGFP_onecopy_st9_0035.tab.txt	3	2	54	3.48	130	0.96	160	0.81	0.8125	145	262.79
MS2/MCP	bcd*GFP st9 1x bcdMS2	2015-09-02	bcdGFP_onecopy_st9_0035.tab.txt	3	2	57	0.79	90	0.81	120	0.94	0.75	105	145.69
MS2/MCP	bcd*GFP st9 1x bcdMS2	2015-09-02	bcdGFP_onecopy_st9_0035.tab.txt	3	2	61	3.34	80	0.84	80	0.86	1	80	79.13
MS2/MCP	bcd*GFP st9 1x bcdMS2	2015-09-02	bcdGFP_onecopy_st9_0035.tab.txt	3	2	66	2.41	150	0.92	100	0.86	1.5	125	156.23
MS2/MCP	bcd*GFP st9 1x bcdMS2	2015-09-02	bcdGFP_onecopy_st9_0035.tab.txt	3	2	70	2.58	120	0.91	90	0.94	1.33333	105	127.47
MS2/MCP	bcd*GFP st9 1x bcdMS2	2015-09-02	bcdGFP_onecopy_st9_0035.tab.txt	3	2	87	0.39	130	0.97	100	0.9	1.3	115	113.67
MS2/MCP	bcd*GFP st9 1x bcdMS2	2015-09-02	bcdGFP_onecopy_st9_0035.tab.txt	3	2	93	4.96	70	0.89	120	0.98	0.583333	95	71.61
MS2/MCP	bcd*GFP st9 1x bcdMS2	2015-09-02	bcdGFP_onecopy_st9_0038.tab.txt	3	3	1	1.82	110	0.92	130	0.88	0.846154	120	273.14
MS2/MCP	bcd*GFP st9 1x bcdMS2	2015-09-02	bcdGFP_onecopy_st9_0038.tab.txt	3	3	3	6.62	110	0.84	170	0.9	0.647059	140	298.64
MS2/MCP	bcd*GFP st9 1x bcdMS2	2015-09-02	bcdGFP_onecopy_st9_0038.tab.txt	3	3	5	6.84	140	0.9	140	0.95	1	140	294.73
MS2/MCP	bcd*GFP st9 1x bcdMS2	2015-09-02	bcdGFP_onecopy_st9_0038.tab.txt	3	3	20	6.49	90	0.83	90	0.89	1	90	101.19
MS2/MCP	bcd*GFP st9 1x bcdMS2	2015-09-02	bcdGFP_onecopy_st9_0038.tab.txt	3	3	21	0.43	80	0.9	120	0.95	0.666667	100	106.13
MS2/MCP	bcd*GFP st9 1x bcdMS2	2015-09-02	bcdGFP_onecopy_st9_0038.tab.txt	3	3	28	3.29	110	0.81	120	0.94	0.916667	115	166.15
MS2/MCP	bcd*GFP st9 1x bcdMS2	2015-09-02	bcdGFP_onecopy_st9_0038.tab.txt	3	3	29	10.83	80	0.96	100	0.93	0.8	90	100.57
MS2/MCP	bcd*GFP st9 1x bcdMS2	2015-09-02	bcdGFP_onecopy_st9_0038.tab.txt	3	3	48	1.4	100	0.81	120	0.96	0.833333	110	113.23
MS2/MCP	bcd*GFP st9 1x bcdMS2	2015-09-02	bcdGFP_onecopy_st9_0038.tab.txt	3	3	56	1.91	50	0.8	50	0.95	1	50	37.42
MS2/MCP	bcd*GFP st9 1x bcdMS2	2015-09-02	bcdGFP_onecopy_st9_0038.tab.txt	3	3	60	3.31	80	0.95	90	0.93	0.888889	85	69.33
MS2/MCP	bcd*GFP st9 1x bcdMS2	2015-09-02	bcdGFP_onecopy_st9_0038.tab.txt	3	3	84	4.44	80	0.94	70	0.85	1.14286	75	53.28
MS2/MCP	bcd*GFP st9 1x bcdMS2	2015-09-02	bcdGFP_onecopy_st9_0038.tab.txt	3	3	90	0.75	60	0.83	80	0.86	0.75	70	51.69
MS2/MCP	bcd*GFP st9 1x bcdMS2	2015-09-02	bcdGFP_onecopy_st9_0038.tab.txt	3	3	94	11.95	90	0.98	180	0.82	0.5	135	122.99
MS2/MCP	bcd*GFP st9 1x bcdMS2	2015-09-02	bcdGFP_onecopy_st9_0041.tab.txt	3	4	2	2.28	160	0.96	110	0.94	1.45455	135	369.48
MS2/MCP	bcd*GFP st9 1x bcdMS2	2015-09-02	bcdGFP_onecopy_st9_0041.tab.txt	3	4	5	1.45	110	0.97	100	0.82	1.1	105	255.08
MS2/MCP	bcd*GFP st9 1x bcdMS2	2015-09-02	bcdGFP_onecopy_st9_0041.tab.txt	3	4	7	1.74	100	0.84	190	0.96	0.526316	145	373.9
MS2/MCP	bcd*GFP st9 1x bcdMS2	2015-09-02	bcdGFP_onecopy_st9_0041.tab.txt	3	4	11	1.36	50	0.89	70	0.91	0.714286	60	87.35
MS2/MCP	bcd*GFP st9 1x bcdMS2	2015-09-02	bcdGFP_onecopy_st9_0041.tab.txt	3	4	17	1.07	150	0.93	130	0.92	1.15385	140	279.82
MS2/MCP	bcd*GFP st9 1x bcdMS2	2015-09-02	bcdGFP_onecopy_st9_0041.tab.txt	3	4	18	0.19	110	0.88	140	0.8	0.785714	125	194.9
MS2/MCP	bcd*GFP st9 1x bcdMS2	2015-09-02	bcdGFP_onecopy_st9_0041.tab.txt	3	4	31	1.23	90	0.88	100	0.94	0.9	95	119.69
MS2/MCP	bcd*GFP st9 1x bcdMS2	2015-09-02	bcdGFP_onecopy_st9_0041.tab.txt	3	4	33	1.82	120	0.91	100	0.94	1.2	110	175.23
MS2/MCP	bcd*GFP st9 1x bcdMS2	2015-09-02	bcdGFP_onecopy_st9_0041.tab.txt	3	4	34	4	130	0.89	120	0.97	1.08333	125	188.39
MS2/MCP	bcd*GFP st9 1x bcdMS2	2015-09-02	bcdGFP_onecopy_st9_0041.tab.txt	3	4	35	1.24	90	0.95	120	0.98	0.75	105	160.94
MS2/MCP	bcd*GFP st9 1x bcdMS2	2015-09-02	bcdGFP_onecopy_st9_0041.tab.txt	3	4	43	1.06	120	0.96	110	0.89	1.09091	115	163.35
MS2/MCP	bcd*GFP st9 1x bcdMS2	2015-09-02	bcdGFP_onecopy_st9_0041.tab.txt	3	4	44	2.38	110	0.83	100	0.92	1.1	105	129.08
MS2/MCP	bcd*GFP st9 1x bcdMS2	2015-09-02	bcdGFP_onecopy_st9_0041.tab.txt	3	4	73	1.2	80	0.84	120	0.83	0.666667	100	94.43
MS2/MCP	bcd*GFP st9 1x bcdMS2	2015-09-02	bcdGFP_onecopy_st9_0041.tab.txt	3	4	84	3.44	100	0.95	80	0.93	1.25	90	80.1
MS2/MCP	bcd*GFP st9 1x bcdMS2	2015-09-02	bcdGFP_onecopy_st9_0041.tab.txt	3	4	87	1.28	60	0.86	50	0.86	1.2	55	32.49
MS2/MCP	bcd*GFP st9 1x bcdMS2	2015-09-02	bcdGFP_onecopy_st9_0044.tab.txt	4	1	0	1.49	90	0.85	100	0.98	0.9	95	433.19
MS2/MCP	bcd*GFP st9 1x bcdMS2	2015-09-02	bcdGFP_onecopy_st9_0044.tab.txt	4	1	5	2.81	140	0.98	200	0.95	0.7	170	755.65
MS2/MCP	bcd*GFP st9 1x bcdMS2	2015-09-02	bcdGFP_onecopy_st9_0044.tab.txt	4	1	9	2.48	110	0.93	220	0.81	0.5	165	627.07
MS2/MCP	bcd*GFP st9 1x bcdMS2	2015-09-02	bcdGFP_onecopy_st9_0044.tab.txt	4	1	20	1.91	100	0.96	100	0.86	1	100	313.27
MS2/MCP	bcd*GFP st9 1x bcdMS2	2015-09-02	bcdGFP_onecopy_st9_0044.tab.txt	4	1	21	1.7	80	0.81	100	0.95	0.8	90	228.55
MS2/MCP	bcd*GFP st9 1x bcdMS2	2015-09-02	bcdGFP_onecopy_st9_0044.tab.txt	4	1	23	2.12	90	0.96	110	0.96	0.818182	100	246.15
MS2/MCP	bcd*GFP st9 1x bcdMS2	2015-09-02	bcdGFP_onecopy_st9_0044.tab.txt	4	1	25	1.78	70	0.94	100	0.99	0.7	85	206.2
MS2/MCP	bcd*GFP st9 1x bcdMS2	2015-09-02	bcdGFP_onecopy_st9_0044.tab.txt	4	1	33	1	90	0.95	110	0.97	0.818182	100	214.86
MS2/MCP	bcd*GFP st9 1x bcdMS2	2015-09-02	bcdGFP_onecopy_st9_0044.tab.txt	4	1	38	2.31	100	0.85	160	0.92	0.625	130	354.78
MS2/MCP	bcd*GFP st9 1x bcdMS2	2015-09-02	bcdGFP_onecopy_st9_0044.tab.txt	4	1	41	3.04	100	0.95	120	0.95	0.833333	110	276.6
MS2/MCP	bcd*GFP st9 1x bcdMS2	2015-09-02	bcdGFP_onecopy_st9_0044.tab.txt	4	1	43	4.42	120	0.91	120	0.91	1	120	293.09
MS2/MCP	bcd*GFP st9 1x bcdMS2	2015-09-02	bcdGFP_onecopy_st9_0044.tab.txt	4	1	46	2.46	100	0.97	80	0.84	1.25	90	139.7
MS2/MCP	bcd*GFP st9 1x bcdMS2	2015-09-02	bcdGFP_onecopy_st9_0044.tab.txt	4	1	47	2.56	60	0.93	70	0.92	0.857143	65	100.51
MS2/MCP	bcd*GFP st9 1x bcdMS2	2015-09-02	bcdGFP_onecopy_st9_0044.tab.txt	4	1	48	1.54	140	0.94	120	0.9	1.16667	130	287.48
MS2/MCP	bcd*GFP st9 1x bcdMS2	2015-09-02	bcdGFP_onecopy_st9_0044.tab.txt	4	1	52	0.62	70	0.89	70	0.98	1	70	110.07
MS2/MCP	bcd*GFP st9 1x bcdMS2	2015-09-02	bcdGFP_onecopy_st9_0044.tab.txt	4	1	54	1.1	100	0.82	100	0.81	1	100	224.02
MS2/MCP	bcd*GFP st9 1x bcdMS2	2015-09-02	bcdGFP_onecopy_st9_0044.tab.txt	4	1	55	2.37	110	0.96	160	0.96	0.6875	135	274.94
MS2/MCP	bcd*GFP st9 1x bcdMS2	2015-09-02	bcdGFP_onecopy_st9_0044.tab.txt	4	1	57	9.92	170	0.99	100	0.88	1.7	135	267.54
MS2/MCP	bcd*GFP st9 1x bcdMS2	2015-09-02	bcdGFP_onecopy_st9_0044.tab.txt	4	1	59	3.9	90	0.86	110	0.94	0.818182	100	165.19
MS2/MCP	bcd*GFP st9 1x bcdMS2	2015-09-02	bcdGFP_onecopy_st9_0044.tab.txt	4	1	60	1.16	70	0.89	120	0.9	0.583333	95	151.18
MS2/MCP	bcd*GFP st9 1x bcdMS2	2015-09-02	bcdGFP_onecopy_st9_0044.tab.txt	4	1	75	3.07	90	0.94	110	0.91	0.818182	100	175.49
MS2/MCP	bcd*GFP st9 1x bcdMS2	2015-09-02	bcdGFP_onecopy_st9_0044.tab.txt	4	1	80	0.75	100	0.96	100	0.8	1	100	154.85
MS2/MCP	bcd*GFP st9 1x bcdMS2	2015-09-02	bcdGFP_onecopy_st9_0044.tab.txt	4	1	84	4.05	110	0.94	100	0.96	1.1	105	156.87
MS2/MCP	bcd*GFP st9 1x bcdMS2	2015-09-02	bcdGFP_onecopy_st9_0044.tab.txt	4	1	87	2.84	80	0.92	80	0.89	1	80	112.36
MS2/MCP	bcd*GFP st9 1x bcdMS2	2015-09-02	bcdGFP_onecopy_st9_0044.tab.txt	4	1	90	3.42	70	0.95	70	0.95	1	70	87.74
MS2/MCP	bcd*GFP st9 1x bcdMS2	2015-09-02	bcdGFP_onecopy_st9_0044.tab.txt	4	1	91	3.58	110	0.88	90	0.91	1.22222	100	160.04
MS2/MCP	bcd*GFP st9 1x bcdMS2	2015-09-02	bcdGFP_onecopy_st9_0044.tab.txt	4	1	93	3.2	110	0.96	140	0.95	0.785714	125	191.3
MS2/MCP	bcd*GFP st9 1x bcdMS2	2015-09-02	bcdGFP_onecopy_st9_0044.tab.txt	4	1	94	2.45	80	0.95	100	0.95	0.8	90	106.96
MS2/MCP	bcd*GFP st9 1x bcdMS2	2015-09-02	bcdGFP_onecopy_st9_0044.tab.txt	4	1	95	2.67	80	0.96	100	0.96	0.8	90	116.7
MS2/MCP	bcd*GFP st9 1x bcdMS2	2015-09-02	bcdGFP_onecopy_st9_0044.tab.txt	4	1	111	3.25	80	0.95	120	0.92	0.666667	100	133.13
MS2/MCP	bcd*GFP st9 1x bcdMS2	2015-09-02	bcdGFP_onecopy_st9_0044.tab.txt	4	1	112	1.51	80	0.93	140	0.94	0.571429	110	149.97
MS2/MCP	bcd*GFP st9 1x bcdMS2	2015-09-02	bcdGFP_onecopy_st9_0044.tab.txt	4	1	113	2.14	50	0.84	100	0.84	0.5	75	81.77
MS2/MCP	bcd*GFP st9 1x bcdMS2	2015-09-02	bcdGFP_onecopy_st9_0044.tab.txt	4	1	120	4.69	70	0.8	90	0.97	0.777778	80	77.54
MS2/MCP	bcd*GFP st9 1x bcdMS2	2015-09-02	bcdGFP_onecopy_st9_0044.tab.txt	4	1	124	1.25	50	0.85	60	0.93	0.833333	55	55.13
MS2/MCP	bcd*GFP st9 1x bcdMS2	2015-09-02	bcdGFP_onecopy_st9_0044.tab.txt	4	1	127	1.94	90	0.84	120	0.9	0.75	105	124.61
MS2/MCP	bcd*GFP st9 1x bcdMS2	2015-09-02	bcdGFP_onecopy_st9_0044.tab.txt	4	1	131	2.52	80	0.99	80	0.8	1	80	82.48
MS2/MCP	bcd*GFP st9 1x bcdMS2	2015-09-02	bcdGFP_onecopy_st9_0044.tab.txt	4	1	139	0.86	70	0.89	120	0.96	0.583333	95	105.66
MS2/MCP	bcd*GFP st9 1x bcdMS2	2015-09-02	bcdGFP_onecopy_st9_0044.tab.txt	4	1	141	2.96	80	0.82	120	0.86	0.666667	100	101.2
MS2/MCP	bcd*GFP st9 1x bcdMS2	2015-09-02	bcdGFP_onecopy_st9_0044.tab.txt	4	1	147	8.59	140	0.87	80	0.94	1.75	110	111.84
MS2/MCP	bcd*GFP st9 1x bcdMS2	2015-09-02	bcdGFP_onecopy_st9_0044.tab.txt	4	1	148	2.39	80	0.8	110	0.95	0.727273	95	85.88
MS2/MCP	bcd*GFP st9 1x bcdMS2	2015-09-02	bcdGFP_onecopy_st9_0044.tab.txt	4	1	152	1.72	130	0.84	130	0.85	1	130	171.91
MS2/MCP	bcd*GFP st9 1x bcdMS2	2015-09-02	bcdGFP_onecopy_st9_0044.tab.txt	4	1	161	3.79	60	0.87	40	0.81	1.5	50	32.83
MS2/MCP	bcd*GFP st9 1x bcdMS2	2015-09-02	bcdGFP_onecopy_st9_0044.tab.txt	4	1	167	9.39	60	0.85	100	0.84	0.6	80	71.2
MS2/MCP	bcd*GFP st9 1x bcdMS2	2015-09-02	bcdGFP_onecopy_st9_0044.tab.txt	4	1	171	5.9	60	0.82	60	0.81	1	60	42.87
MS2/MCP	bcd*GFP st9 1x bcdMS2	2015-09-02	bcdGFP_onecopy_st9_0044.tab.txt	4	1	180	12.27	130	0.81	90	0.87	1.44444	110	91.24
MS2/MCP	bcd*GFP st9 1x bcdMS2	2015-09-02	bcdGFP_onecopy_st9_0047.tab.txt	4	2	17	1.32	100	0.95	90	0.8	1.11111	95	236.78
MS2/MCP	bcd*GFP st9 1x bcdMS2	2015-09-02	bcdGFP_onecopy_st9_0047.tab.txt	4	2	32	2.25	80	0.97	90	0.93	0.888889	85	208.16
MS2/MCP	bcd*GFP st9 1x bcdMS2	2015-09-02	bcdGFP_onecopy_st9_0047.tab.txt	4	2	35	1.41	100	0.87	120	0.94	0.833333	110	245.62
MS2/MCP	bcd*GFP st9 1x bcdMS2	2015-09-02	bcdGFP_onecopy_st9_0047.tab.txt	4	2	36	2.35	120	0.99	140	0.96	0.857143	130	308.59
MS2/MCP	bcd*GFP st9 1x bcdMS2	2015-09-02	bcdGFP_onecopy_st9_0047.tab.txt	4	2	49	0.44	150	0.98	90	0.96	1.66667	120	267.26
MS2/MCP	bcd*GFP st9 1x bcdMS2	2015-09-02	bcdGFP_onecopy_st9_0047.tab.txt	4	2	50	5.27	110	0.95	100	0.93	1.1	105	186.72
MS2/MCP	bcd*GFP st9 1x bcdMS2	2015-09-02	bcdGFP_onecopy_st9_0047.tab.txt	4	2	60	10.01	110	0.85	100	0.98	1.1	105	175.47
MS2/MCP	bcd*GFP st9 1x bcdMS2	2015-09-02	bcdGFP_onecopy_st9_0047.tab.txt	4	2	61	4.18	70	0.9	80	0.9	0.875	75	108.76
MS2/MCP	bcd*GFP st9 1x bcdMS2	2015-09-02	bcdGFP_onecopy_st9_0047.tab.txt	4	2	67	0.66	80	0.98	100	0.95	0.8	90	126.07
MS2/MCP	bcd*GFP st9 1x bcdMS2	2015-09-02	bcdGFP_onecopy_st9_0047.tab.txt	4	2	68	2.06	100	0.91	80	0.97	1.25	90	128.34
MS2/MCP	bcd*GFP st9 1x bcdMS2	2015-09-02	bcdGFP_onecopy_st9_0047.tab.txt	4	2	73	1.45	100	0.82	80	0.97	1.25	90	131.46
MS2/MCP	bcd*GFP st9 1x bcdMS2	2015-09-02	bcdGFP_onecopy_st9_0047.tab.txt	4	2	88	2.31	140	0.97	80	0.9	1.75	110	108.81
MS2/MCP	bcd*GFP st9 1x bcdMS2	2015-09-02	bcdGFP_onecopy_st9_0047.tab.txt	4	2	89	1.43	150	0.89	120	0.98	1.25	135	193.39
MS2/MCP	bcd*GFP st9 1x bcdMS2	2015-09-02	bcdGFP_onecopy_st9_0047.tab.txt	4	2	90	1.37	80	0.95	80	0.87	1	80	90.76
MS2/MCP	bcd*GFP st9 1x bcdMS2	2015-09-02	bcdGFP_onecopy_st9_0047.tab.txt	4	2	91	7.57	130	0.8	110	0.95	1.18182	120	156.29
[truncated: 4,586 more rows]
